# Supplementary material for: Host growth and defense pathways drive microbiome-mediated maize heterosis
Source: Research Square preprint supplement (doi:10.21203/rs.3.rs-6347267/v1), 2025-05-05
Supplement: Supplementary file 1 [file 0b4df6f5d1a53bab9e70adef.docx]

**Supplementary file**


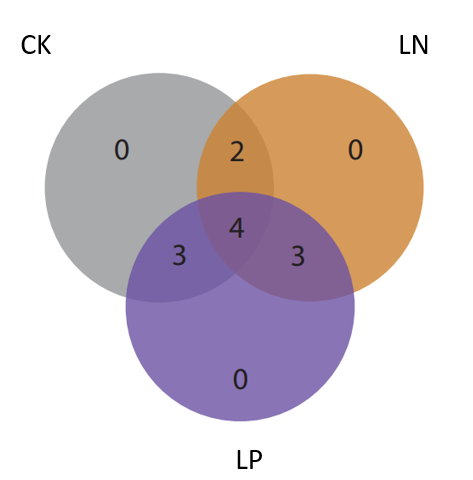


**Fig. S1: Heterosis in primary root length under different soil conditions.** CK: Control soil, LN: Low nitrogen soil, LP: Low phosphorus soil. The numbers indicate the extent of primary root heterosis observed in the crossed hybrids.


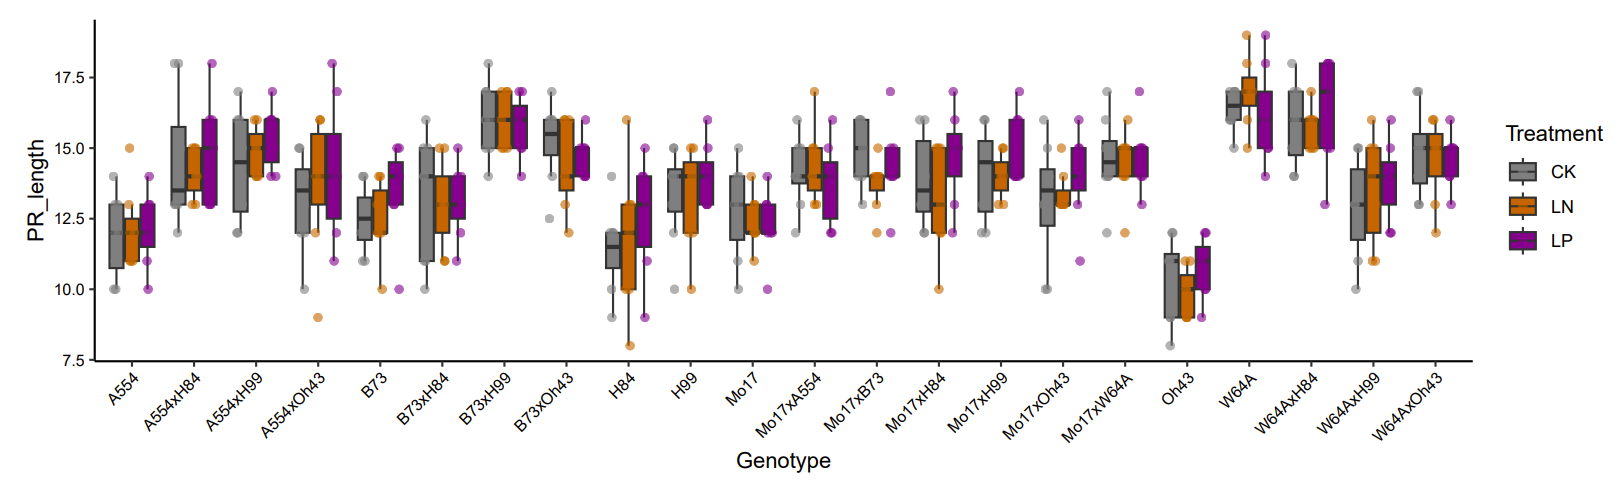


**Fig. S2: Boxplot of primary root (PR) length for each genotype under different soil conditions.** CK: Control soil; LN: Low nitrogen soil; LP: Low phosphorus soil.

a b


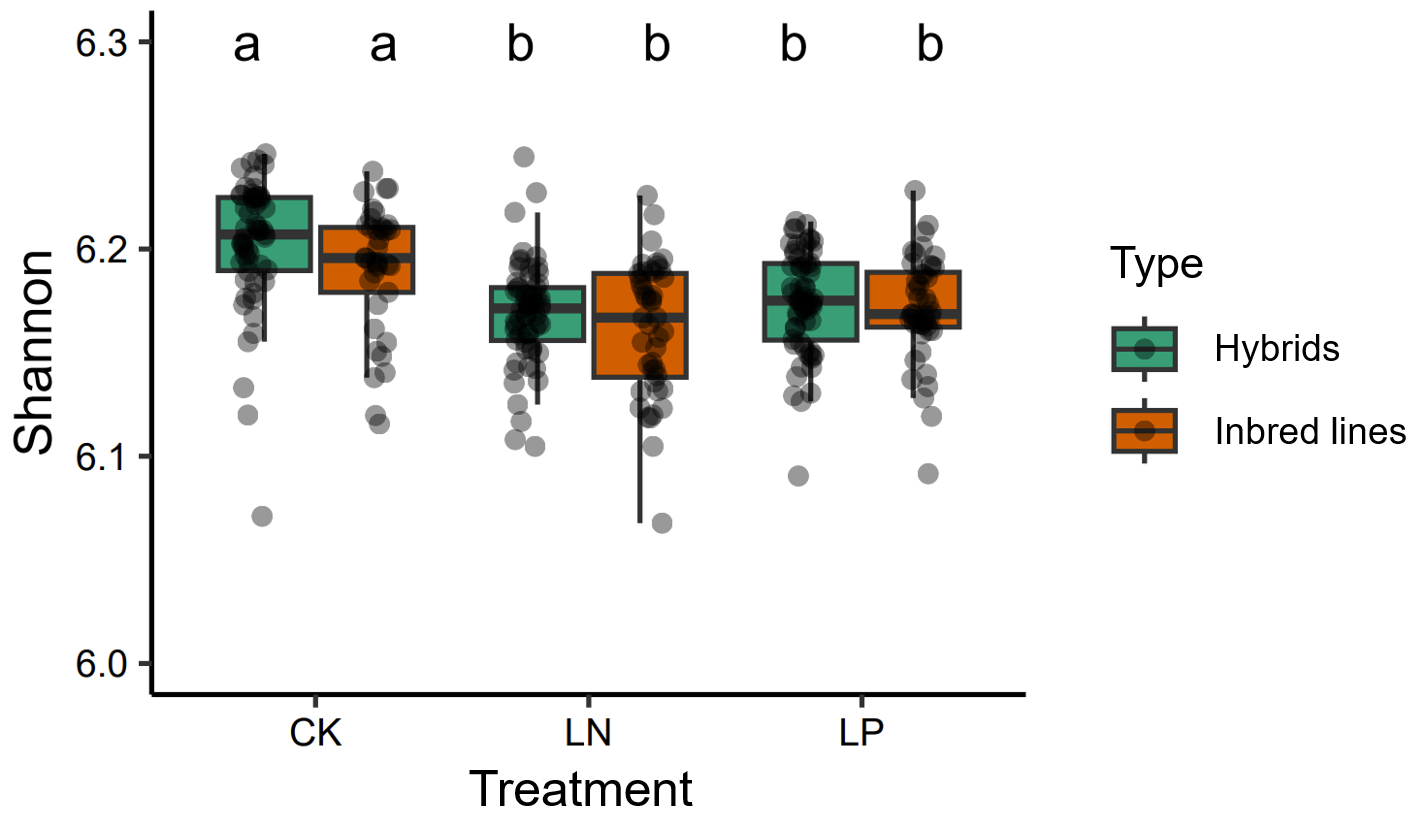

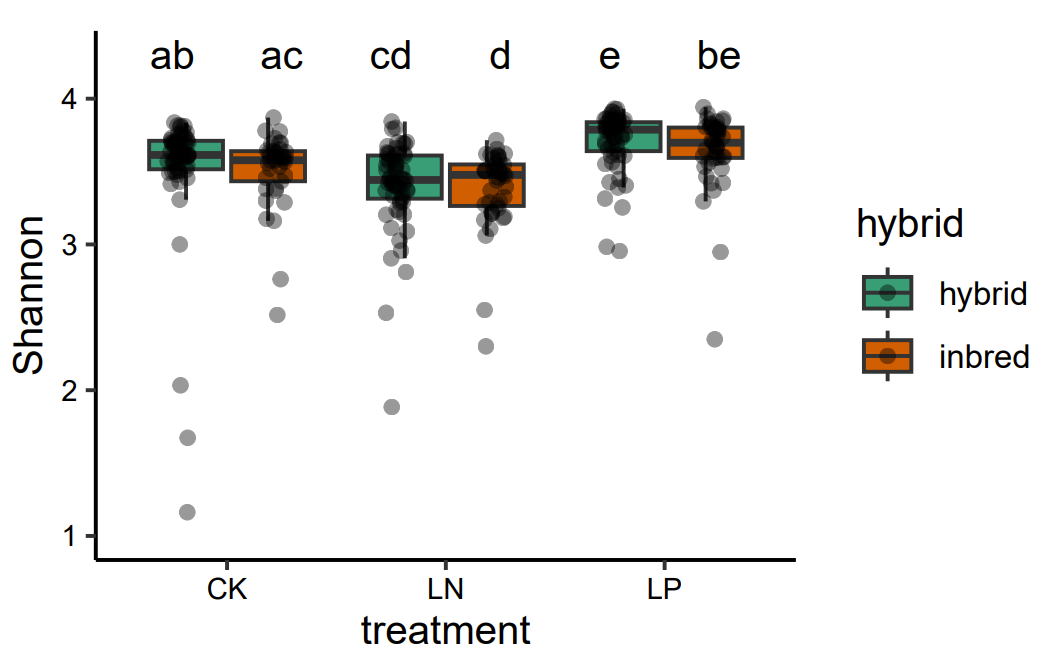

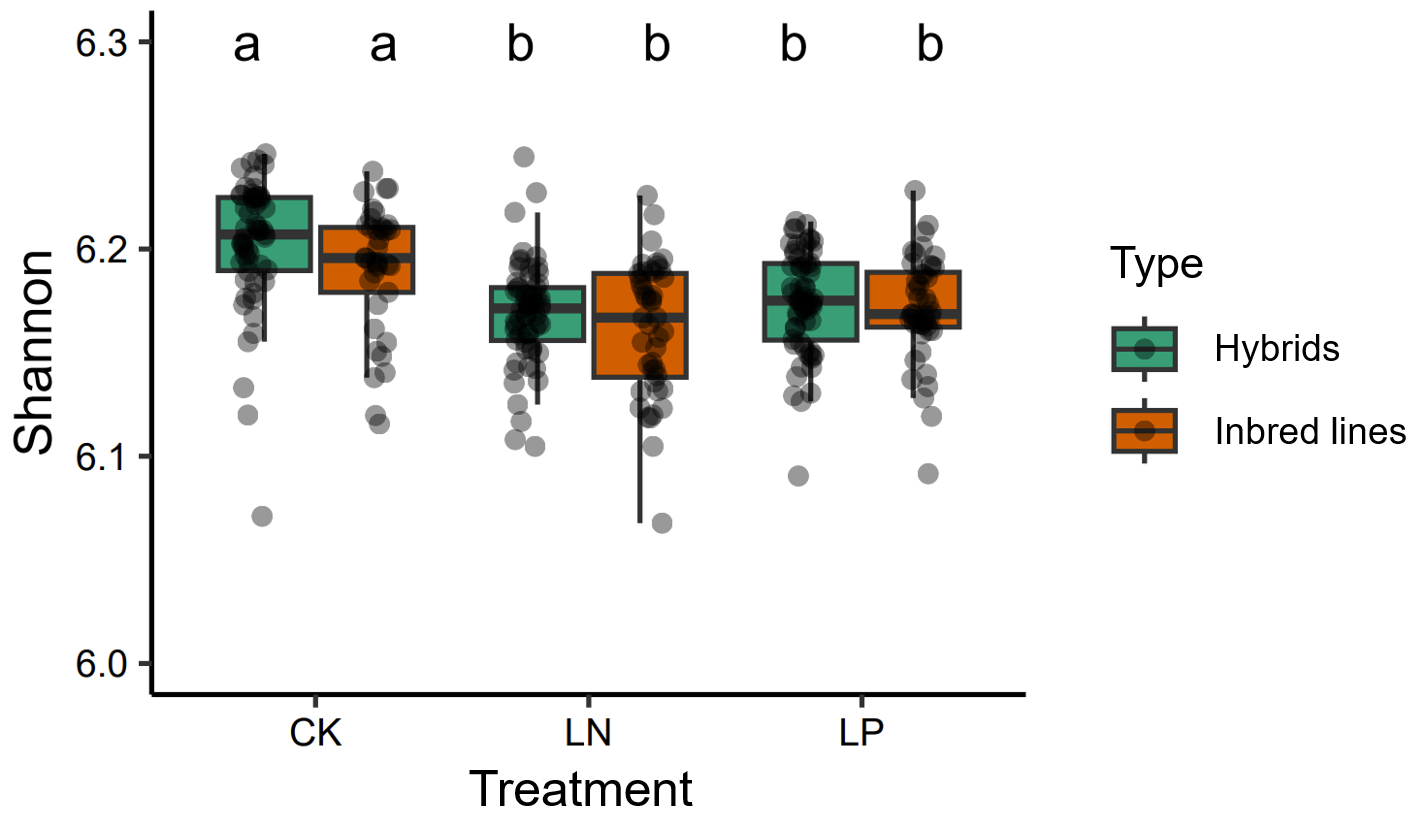


**Fig. S3: Comparison of Shannon alpha diversity for bacteria (a) and fungi (b) between hybrids and inbred lines under different soil conditions.** CK: Control soil; LN: Low nitrogen soil; LP: Low phosphorus soil. Colors distinguish hybrids from inbred lines. Significance levels are indicated by different letters (*P* <0.05).

a b


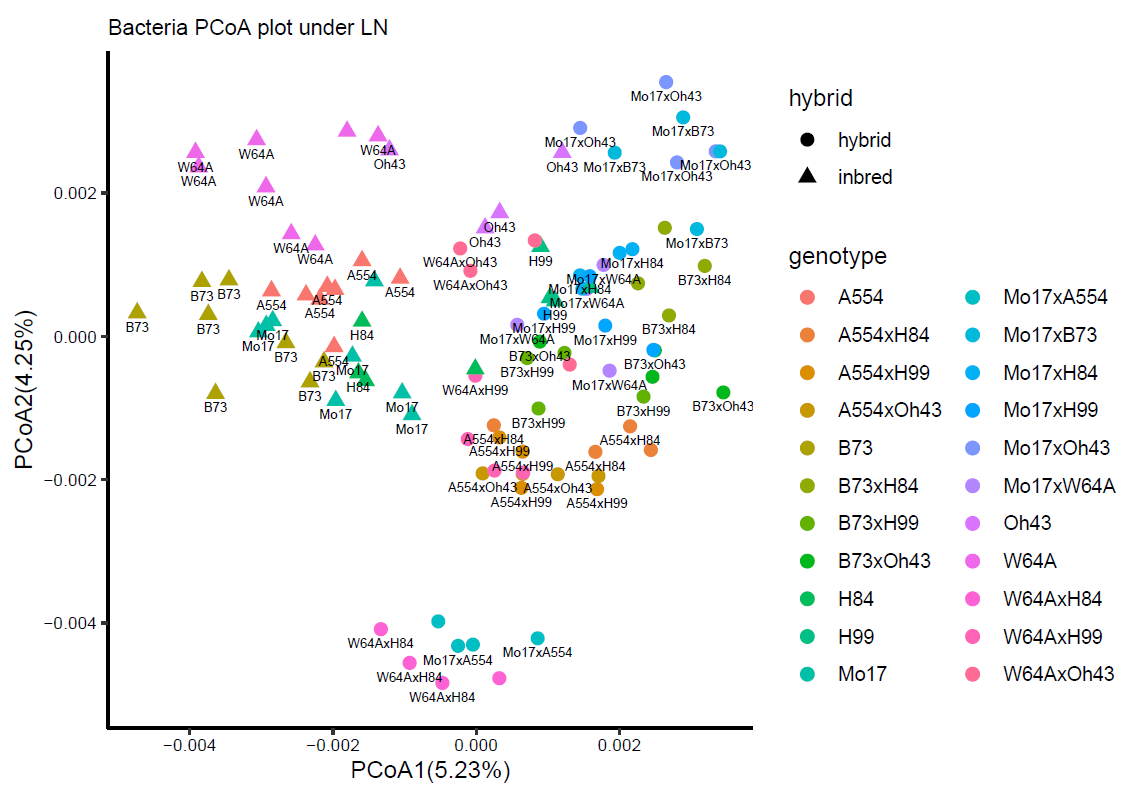

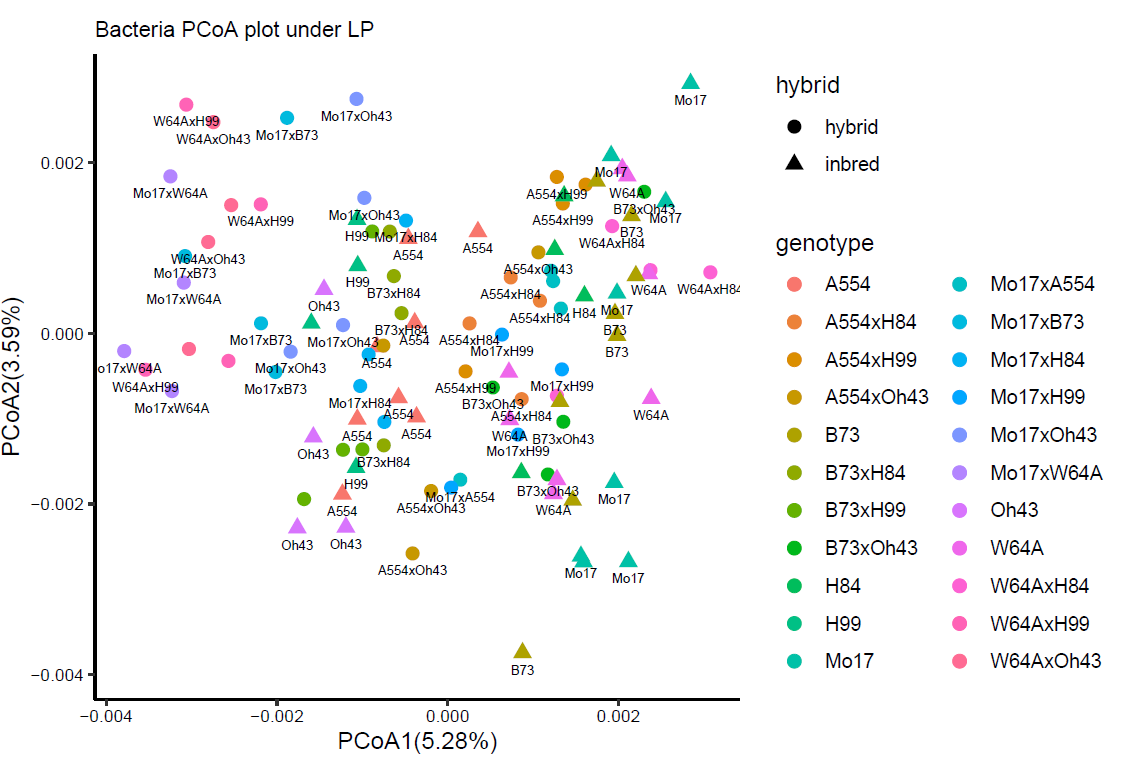


**Fig. S4: PCoA plot of bacterial community composition under low nitrogen (a) and low phosphorus (b) conditions.** Different colors represent different genotypes, with circles indicating hybrids and triangles representing inbred lines.

a b


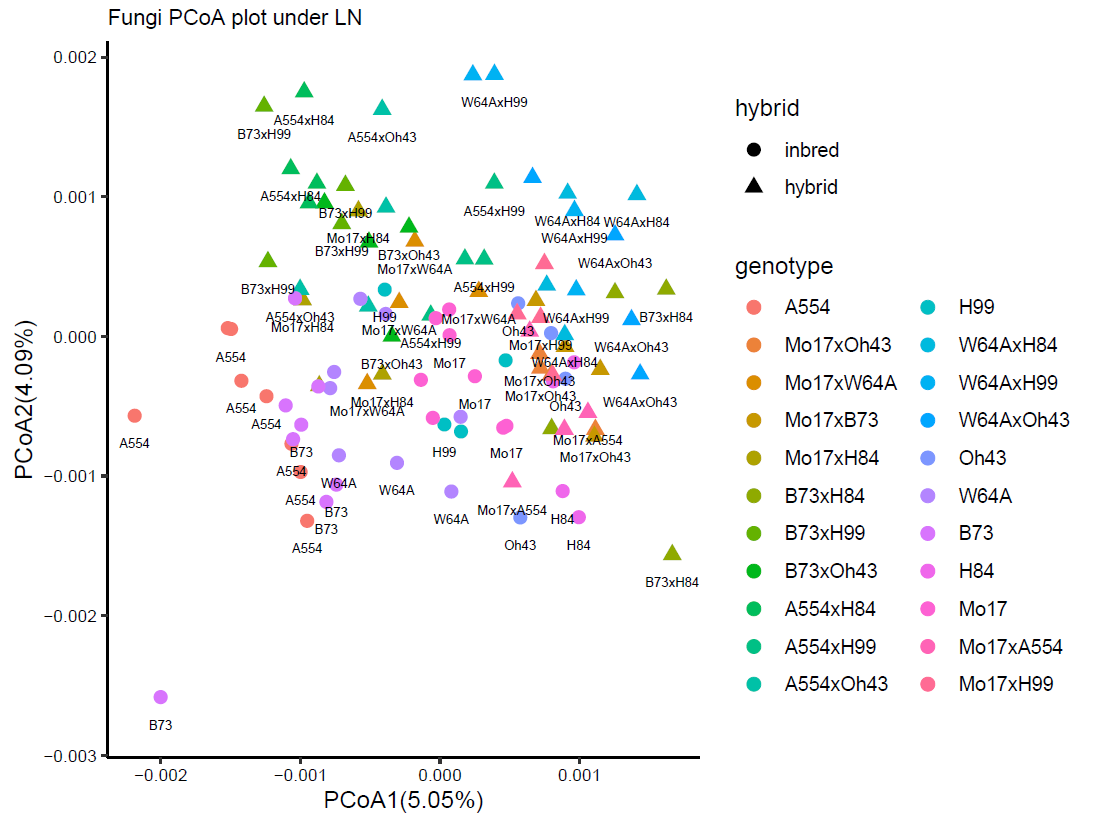

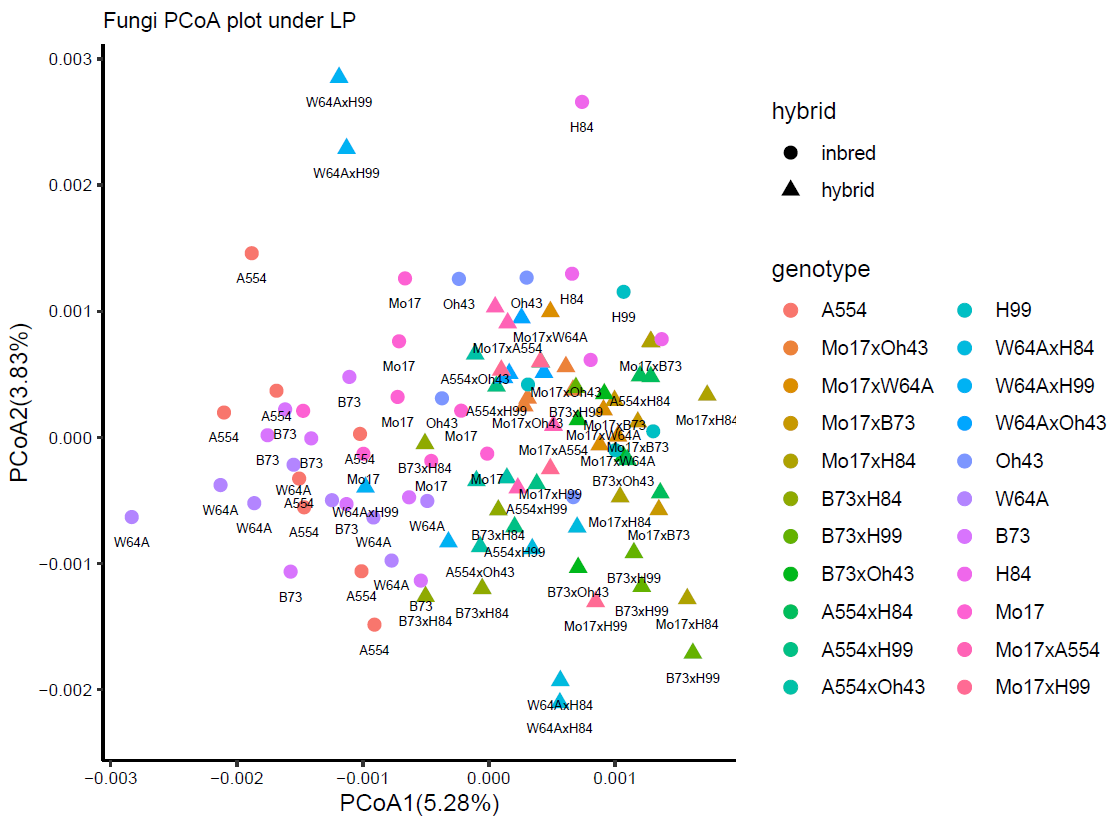


**Fig. S5: PCoA plot of fungal community composition under low nitrogen (a) and low phosphorus (b) conditions.** Different colors represent genotypes, with circles indicating inbred lines and triangles representing hybrids.


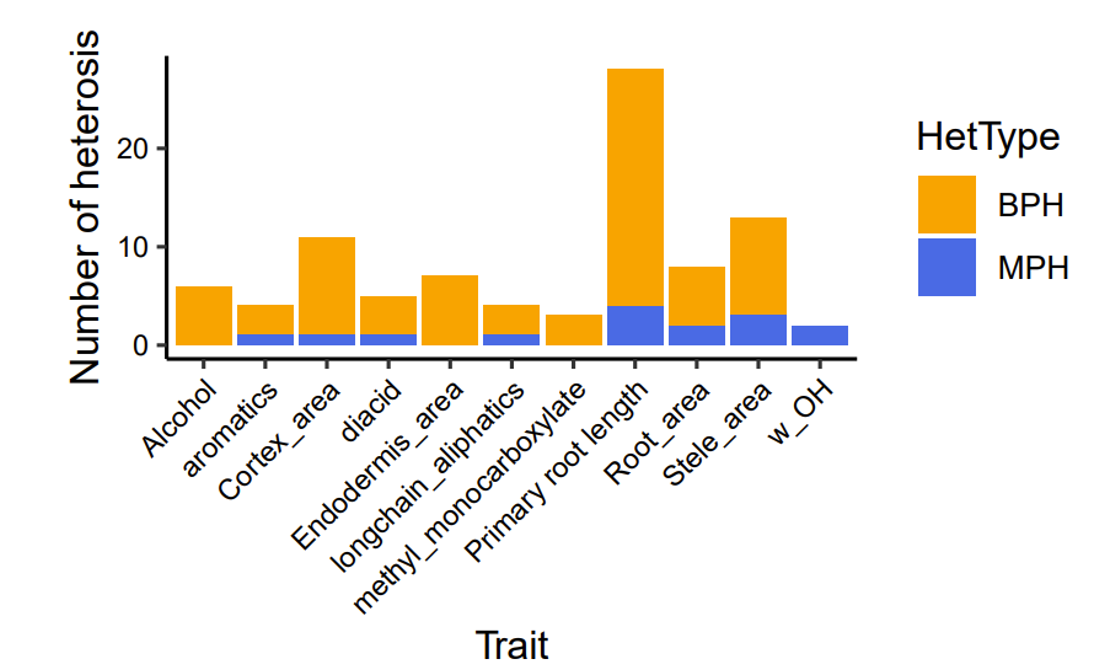


**Fig. S6: Comparison of better-parent heterosis (BPH) and mid-parent heterosis (MPH) for each trait.** BPH: better-parent heterosis; MPH: mid-parent heterosis.

a b


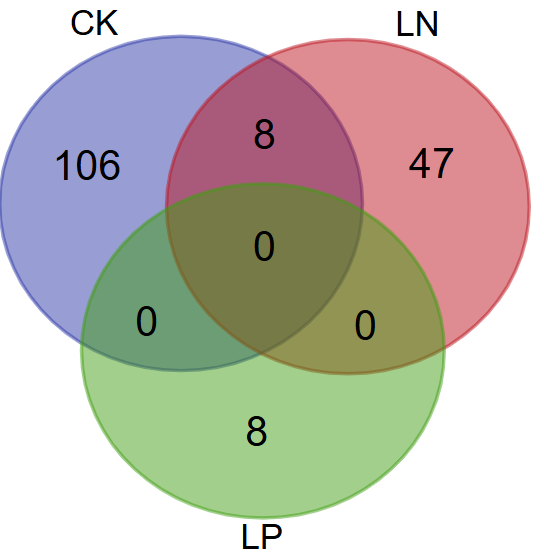

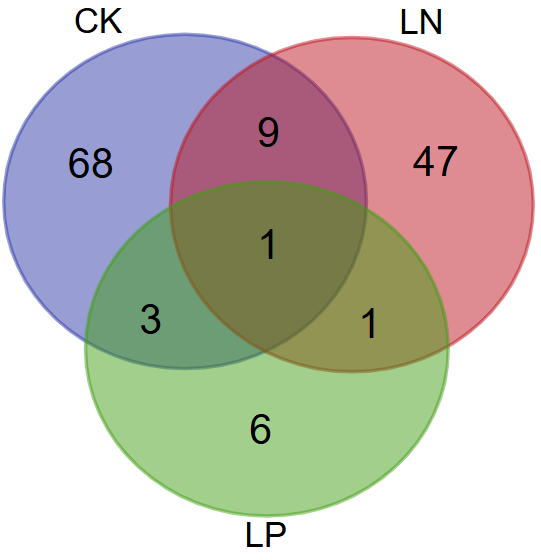


**Fig. S7: Overlap of bacterial ASVs enriched in hybrids (a) and inbred lines (b) across three soil conditions.** CK: control soil; LN: low nitrogen soil; LP: low phosphorus soil.

a b


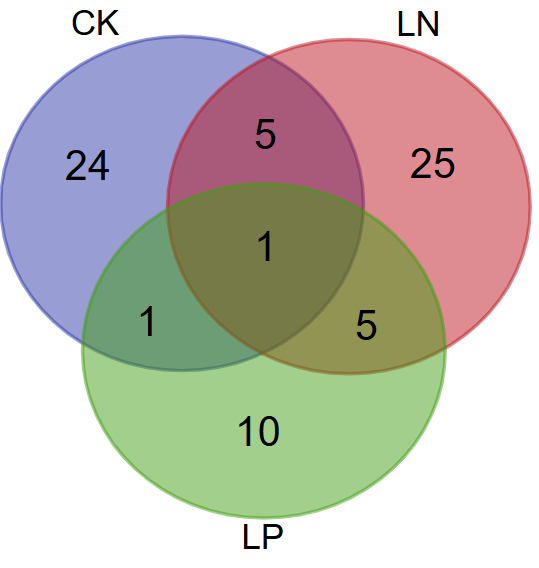

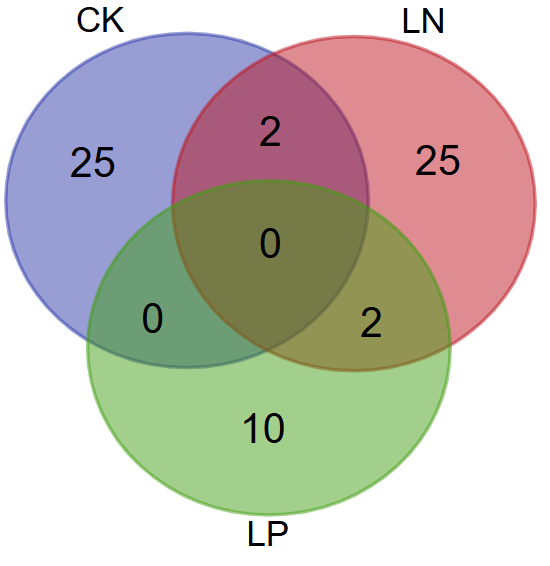


**Fig. S8: Overlap of fungal ASVs enriched in hybrids (a) and inbred lines (b) across three soil conditions.** CK: control soil; LN: low nitrogen soil; LP: low phosphorus soil.

a b c


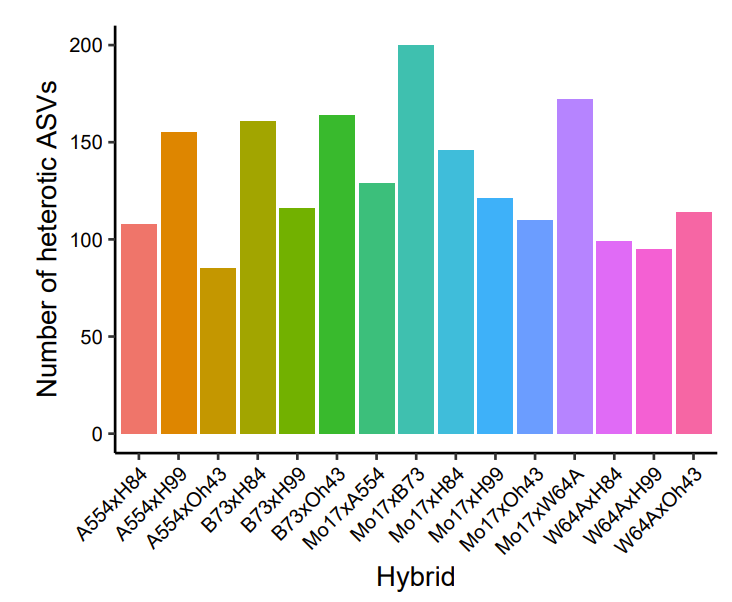

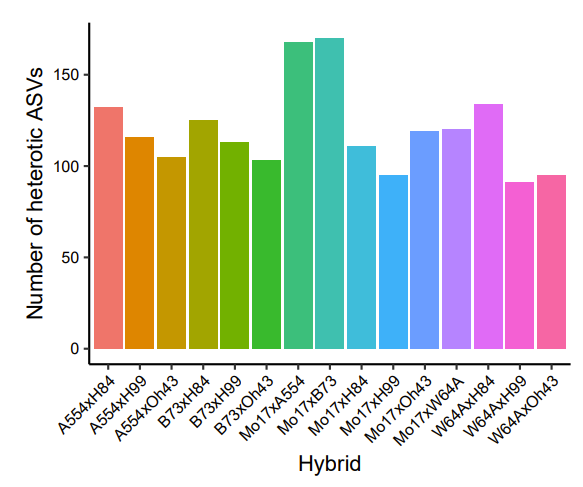

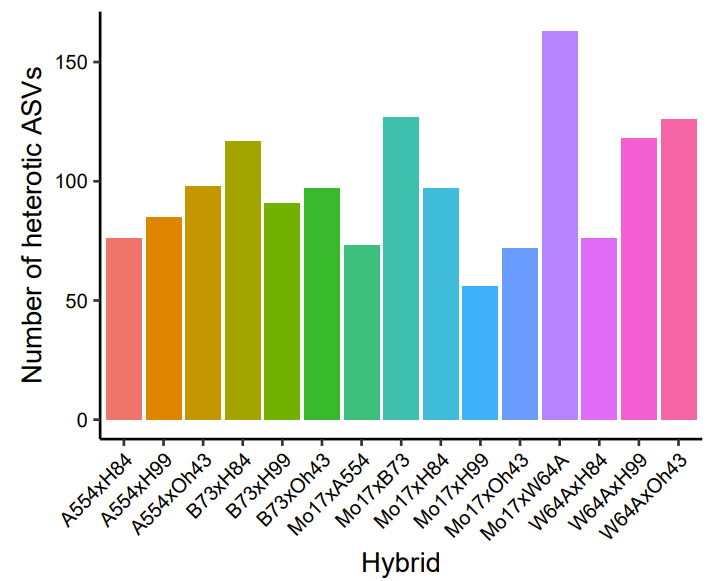


**Fig. S9: Number of heterotic bacterial ASVs in each hybrid-parent triplet under control soil (a), low nitrogen soil (b), and low phosphorus soil (c).** Each bar represents the number of heterotic ASVs in different hybrids relative to their parental lines.

a b c


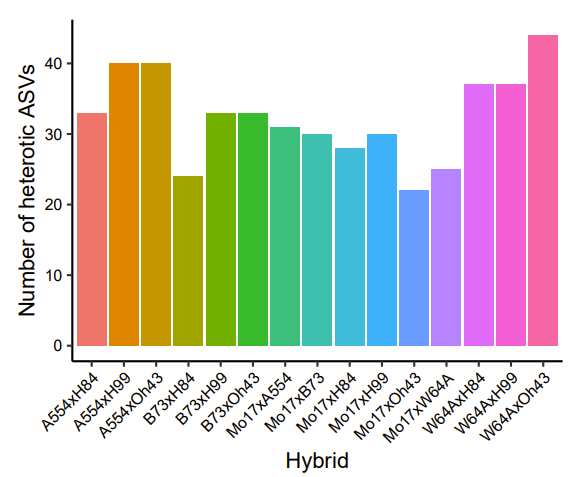

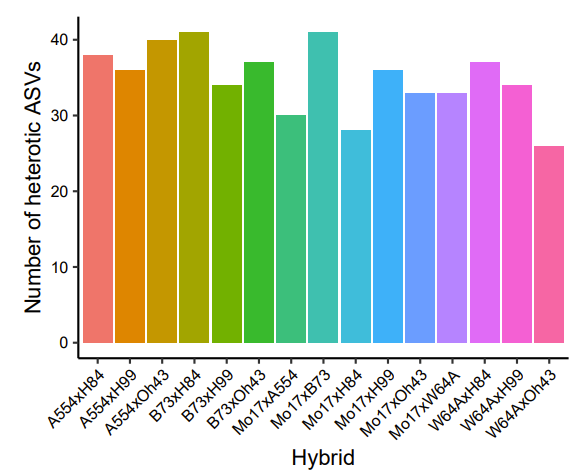

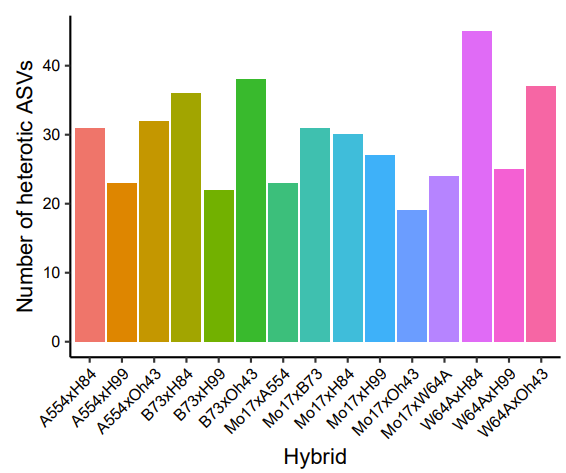


**Fig. S10: Number of heterotic fungal ASVs in each hybrid-parent triplet under control soil (a), low nitrogen soil (b), and low phosphorus soil (c).** Each bar represents the number of heterotic ASVs in different hybrids relative to their parental lines.

a b


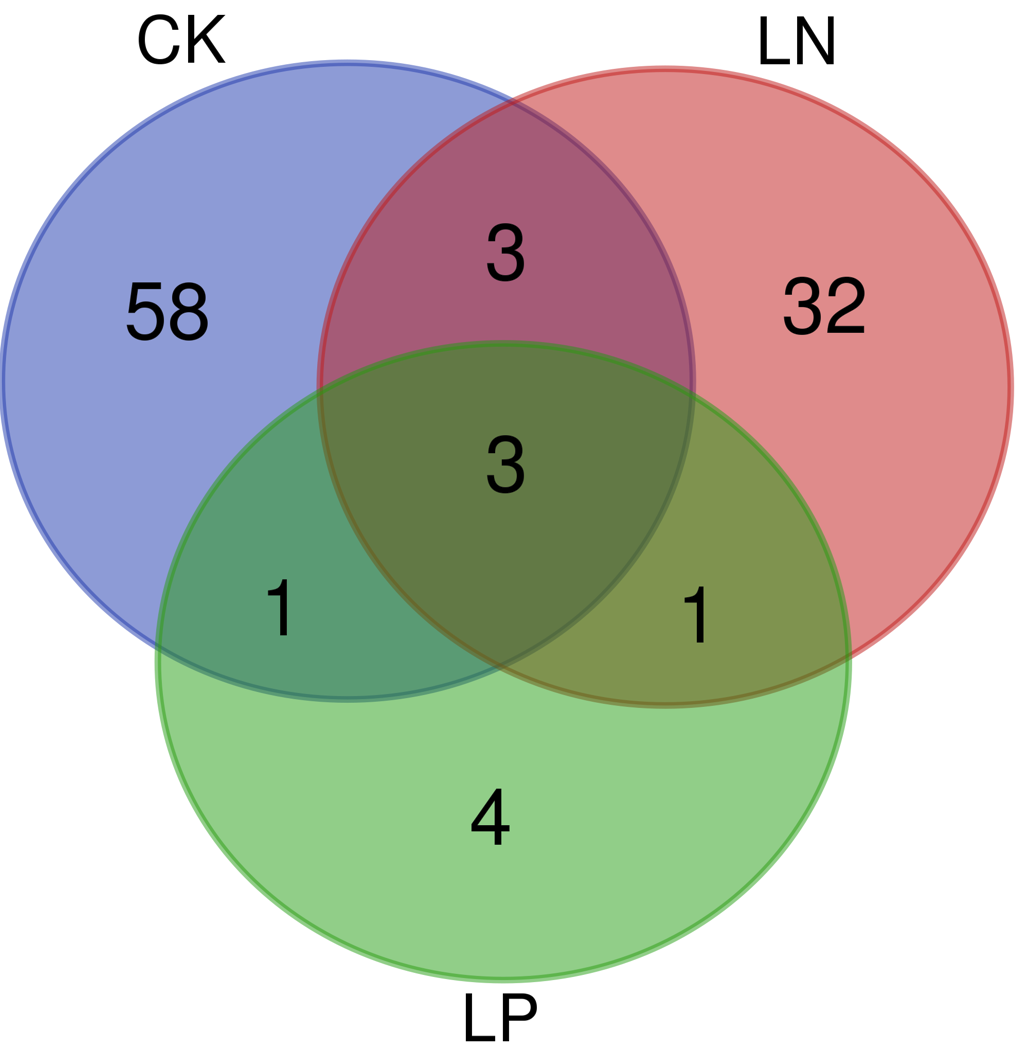

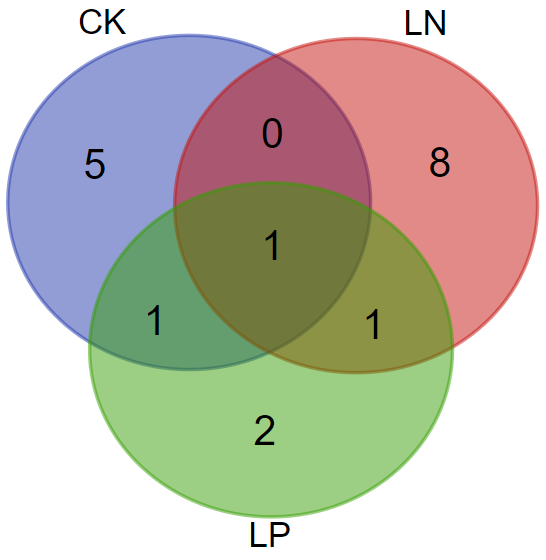


**Fig. S11: Number of ASVs exhibiting heterosis in more than five hybrids for bacteria (a) and fungi (b) under each soil condition.** CK: control soil; LN: low nitrogen soil; LP: low phosphorus soil.

a b c


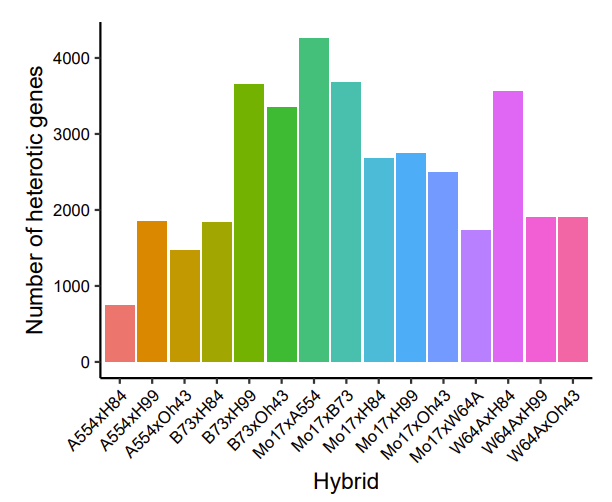

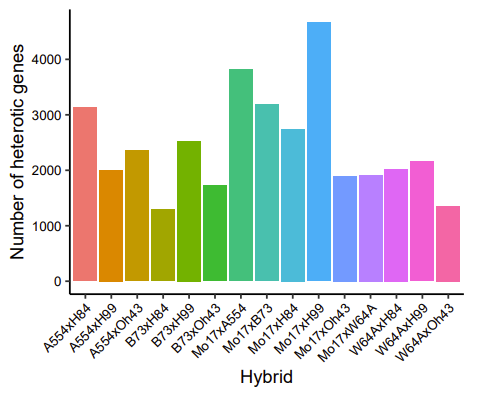

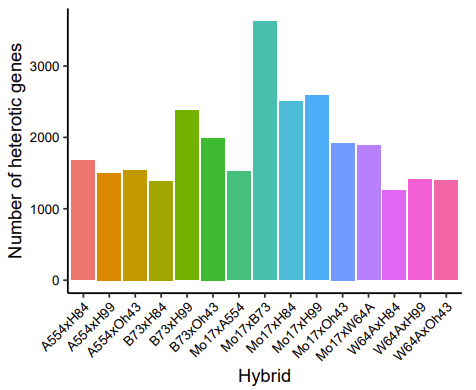


**Fig. S12: Number of heterotic genes in each hybrid-parent triplet under control soil (a), low nitrogen soil (b), and low phosphorus soil (c).** Bars represent the number of heterotic genes in different hybrids compared to their respective parents.
