# Supplementary material for: Host growth and defense pathways drive microbiome-mediated maize heterosis
Source: Research Square preprint supplement (doi:10.21203/rs.3.rs-6347267/v1), 2025-05-05
Supplement: Supplementary file 2 [file c4fbe09a202ad68c9e93529e.xlsx]

## Sheet: Table S1
Table S1 Heterosis levels of primary root length for each hybrid-parents pair under each soil condition. BPH: better-parent heterosis; MPH: mid-parent heterosis. CK: control soil; LN: low nitrogen soil; LP: low phosphorus soil.
Maternal	Paternal	Hybrid	MatMean	PatMean	HybMean	MidParentValue	BetterParentValue	Trait	MPH.percent	BPH.percent	BPH.padj	MPH.padj	HetType	Treatment
Mo17	A554	Mo17xA554	12.4286	12.1429	14.4286	12.2857	12.4286	PR_length		0.16092	0.0045526		BPH	LN
Mo17	H99	Mo17xH99	12.4286	13.1429	14	12.7857	13.1429	PR_length		0.0652174	0.0160522		BPH	LN
Mo17	Oh43	Mo17xOh43	12.4286	9.85714	13.4286	11.1429	12.4286	PR_length		0.0804598	0.0075895		BPH	LN
Mo17	B73	Mo17xB73	12.4286	12.4286	13.7143	12.4286	12.4286	PR_length		0.103448	0.00584798		BPH	LN
B73	H99	B73xH99	12.4286	13.1429	16	12.7857	13.1429	PR_length		0.217391	0.000139129		BPH	LN
B73	Oh43	B73xOh43	12.4286	9.85714	14.4286	11.1429	12.4286	PR_length		0.16092	0.00852036		BPH	LN
A554	H84	A554xH84	12.1429	11.7143	14.1429	11.9286	12.1429	PR_length		0.164706	0.000535495		BPH	LN
A554	H99	A554xH99	12.1429	13.1429	14.8571	12.6429	13.1429	PR_length		0.130435	0.00117725		BPH	LN
W64A	H84	W64AxH84	17	11.7143	15.7143	14.3571	17	PR_length	0.0945274			0.00315872	MPH	LN
Mo17	A554	Mo17xA554	12.75	11.875	14.125	12.3125	12.75	PR_length		0.107843	0.00841953		BPH	CK
Mo17	B73	Mo17xB73	12.75	12.5	14.875	12.625	12.75	PR_length		0.166667	0.000539109		BPH	CK
Mo17	H84	Mo17xH84	12.75	11.375	13.875	12.0625	12.75	PR_length		0.0882353	0.0469211		BPH	CK
B73	H99	B73xH99	12.5	13.375	16	12.9375	13.375	PR_length		0.196262	0.000379023		BPH	CK
B73	Oh43	B73xOh43	12.5	10.375	15.1875	11.4375	12.5	PR_length		0.215	0.000514627		BPH	CK
A554	H84	A554xH84	11.875	11.375	14.5	11.625	11.875	PR_length		0.221053	0.00767422		BPH	CK
A554	Oh43	A554xOh43	11.875	10.375	13.125	11.125	11.875	PR_length		0.105263	0.0399214		BPH	CK
W64A	H84	W64AxH84	16.375	11.375	15.875	13.875	16.375	PR_length	0.144144			0.00604854	MPH	CK
W64A	Oh43	W64AxOh43	16.375	10.375	14.875	13.375	16.375	PR_length	0.11215			0.0292321	MPH	CK
Mo17	A554	Mo17xA554	12.2857	12.1429	13.7143	12.2143	12.2857	PR_length		0.116279	0.022447		BPH	LP
Mo17	H99	Mo17xH99	12.2857	14	15	13.1429	14	PR_length		0.0714286	0.0431574		BPH	LP
Mo17	Oh43	Mo17xOh43	12.2857	10.7143	14	11.5	12.2857	PR_length		0.139535	0.0160522		BPH	LP
Mo17	H84	Mo17xH84	12.2857	12.5714	14.7143	12.4286	12.5714	PR_length		0.170455	0.00793783		BPH	LP
B73	H99	B73xH99	13.4286	14	15.7143	13.7143	14	PR_length		0.122449	0.00326501		BPH	LP
B73	Oh43	B73xOh43	13.4286	10.7143	14.7143	12.0714	13.4286	PR_length		0.0957447	0.00205197		BPH	LP
A554	H84	A554xH84	12.1429	12.5714	14.8571	12.3571	12.5714	PR_length		0.181818	0.01058		BPH	LP
A554	H99	A554xH99	12.1429	14	15.4286	13.0714	14	PR_length		0.102041	0.00787071		BPH	LP
A554	Oh43	A554xOh43	12.1429	10.7143	14.1429	11.4286	12.1429	PR_length		0.164706	0.0414069		BPH	LP
W64A	Oh43	W64AxOh43	16.1429	10.7143	14.5714	13.4286	16.1429	PR_length	0.0851064			0.02116	MPH	LP

## Sheet: Table S2
Table S2 Heterosis levels of anatomical traits for each hybrid-parents pair under control soil condition. BPH: better-parent heterosis; MPH: mid-parent heterosis.
Maternal	Paternal	Hybrid	MatMean	PatMean	HybMean	MidParentValue	BetterParentValue	Trait	MPH.percent	BPH.percent	Zone	BPH.padj	MPH.padj	HetType
Mo17	H84	Mo17xH84	0.730358	0.743433	0.934087	0.736895	0.743433	Root_area		0.256451	Z1	0.0176943		BPH
B73	Oh43	B73xOh43	0.612777	0.638806	0.808504	0.625791	0.638806	Root_area		0.265649	Z1	0.0115423		BPH
Mo17	H84	Mo17xH84	0.0979375	0.0854319	0.117522	0.0916847	0.0979375	Stele_area		0.199974	Z1	0.0176943		BPH
B73	Oh43	B73xOh43	0.0901605	0.108218	0.12478	0.099189	0.108218	Stele_area		0.15305	Z1	0.0209826		BPH
A554	H99	A554xH99	0.090331	0.0618244	0.105229	0.0760777	0.090331	Stele_area		0.164922	Z1	0.0052306		BPH
Mo17	H84	Mo17xH84	0.632421	0.658001	0.816564	0.645211	0.658001	Cortex_area		0.240978	Z1	0.0176943		BPH
B73	Oh43	B73xOh43	0.522616	0.530588	0.683724	0.526602	0.530588	Cortex_area		0.288614	Z1	0.0115423		BPH
B73	H99	B73xH99	0.0225047	0.0213307	0.0365459	0.0219177	0.0225047	Endodermis_area		0.623918	Z1	0.0336122		BPH
Mo17	H84	Mo17xH84	0.904848	0.915431	1.11595	0.910139	0.915431	Root_area		0.219047	Z2	0.00664989		BPH
A554	H84	A554xH84	0.752587	0.915431	0.65325	0.834009	0.752587	Root_area		-0.131993	Z2	0.0175556		BPH
W64A	Oh43	W64AxOh43	0.652526	0.785943	0.606539	0.719235	0.652526	Root_area		-0.070476	Z2	0.0417226		BPH
Mo17	A554	Mo17xA554	0.154435	0.130033	0.179903	0.142234	0.154435	Stele_area		0.164915	Z2	0.0012797		BPH
Mo17	Oh43	Mo17xOh43	0.154435	0.15879	0.174605	0.156612	0.15879	Stele_area		0.0995971	Z2	0.0179493		BPH
Mo17	W64A	Mo17xW64A	0.154435	0.102218	0.162873	0.128326	0.154435	Stele_area		0.0546384	Z2	0.0228647		BPH
Mo17	H84	Mo17xH84	0.154435	0.141462	0.195016	0.147948	0.154435	Stele_area		0.262771	Z2	0.00664989		BPH
B73	H84	B73xH84	0.135162	0.141462	0.117016	0.138312	0.135162	Stele_area		-0.134249	Z2	0.0136899		BPH
B73	Oh43	B73xOh43	0.135162	0.15879	0.156228	0.146976	0.15879	Stele_area	0.062951		Z2		0.0252667	MPH
A554	H84	A554xH84	0.130033	0.141462	0.11485	0.135748	0.130033	Stele_area		-0.116764	Z2	0.0175556		BPH
Mo17	H84	Mo17xH84	0.750413	0.773968	0.920938	0.762191	0.773968	Cortex_area		0.189891	Z2	0.00790684		BPH
B73	H99	B73xH99	0.583009	0.598023	0.634774	0.590516	0.598023	Cortex_area		0.0614549	Z2	0.00828775		BPH
A554	H84	A554xH84	0.622554	0.773968	0.5384	0.698261	0.622554	Cortex_area		-0.135174	Z2	0.0175556		BPH
W64A	Oh43	W64AxOh43	0.547786	0.627153	0.481173	0.58747	0.547786	Cortex_area		-0.121604	Z2	0.0230624		BPH
Mo17	A554	Mo17xA554	0.0361133	0.0216924	0.041119	0.0289028	0.0361133	Endodermis_area		0.138609	Z2	0.0266664		BPH
Mo17	H99	Mo17xH99	0.0361133	0.0298481	0.0670382	0.0329807	0.0361133	Endodermis_area		0.85633	Z2	0.0429309		BPH
B73	H99	B73xH99	0.0255231	0.0298481	0.0461802	0.0276856	0.0298481	Endodermis_area		0.547175	Z2	0.00828775		BPH
Mo17	Oh43	Mo17xOh43	1.29562	1.01941	1.28147	1.15752	1.29562	Root_area	0.107084		Z3		0.014309	MPH
W64A	H84	W64AxH84	0.913785	1.19207	0.98121	1.05293	1.19207	Root_area	-0.0681138		Z3		0.0212906	MPH
W64A	H99	W64AxH99	0.913785	0.961458	1.09682	0.937622	0.961458	Root_area		0.140792	Z3	0.0331241		BPH
Mo17	Oh43	Mo17xOh43	0.30552	0.227064	0.28132	0.266292	0.30552	Stele_area	0.0564339		Z3		0.00226316	MPH
Mo17	H84	Mo17xH84	0.30552	0.234397	0.297839	0.269959	0.30552	Stele_area	0.103277		Z3		0.0283511	MPH
W64A	H99	W64AxH99	0.171059	0.184389	0.221824	0.177724	0.184389	Stele_area		0.203021	Z3	0.0267456		BPH
Mo17	H99	Mo17xH99	0.952212	0.752246	1.02304	0.852229	0.952212	Cortex_area		0.0743858	Z3	0.0397457		BPH
Mo17	H84	Mo17xH84	0.952212	0.931032	1.02581	0.941622	0.952212	Cortex_area		0.0772956	Z3	0.0373533		BPH
W64A	H84	W64AxH84	0.730359	0.931032	0.739277	0.830695	0.931032	Cortex_area	-0.110051		Z3		0.0022901	MPH
W64A	H99	W64AxH99	0.730359	0.752246	0.846033	0.741303	0.752246	Cortex_area		0.124676	Z3	0.0331241		BPH
W64A	Oh43	W64AxOh43	0.730359	0.759044	0.687015	0.744702	0.730359	Cortex_area		-0.0593472	Z3	0.0274744		BPH
Mo17	H99	Mo17xH99	0.0543426	0.0401247	0.0763856	0.0472336	0.0543426	Endodermis_area		0.405629	Z3	0.0397457		BPH
Mo17	Oh43	Mo17xOh43	0.0543426	0.0477248	0.0672839	0.0510337	0.0543426	Endodermis_area		0.238143	Z3	0.0217868		BPH
W64A	H99	W64AxH99	0.0262602	0.0401247	0.0647937	0.0331925	0.0401247	Endodermis_area		0.614811	Z3	0.049839		BPH

## Sheet: Table S3
Table S3 Heterosis levels of suberin traits for each hybrid-parents pair under control soil condition. BPH: better-parent heterosis; MPH: mid-parent heterosis.
Maternal	Paternal	Hybrid	MatMean	PatMean	HybMean	MidParentValue	BetterParentValue	Trait	MPH.percent	BPH.percent	BPH.padj	MPH.padj	HetType
Mo17	W64A	Mo17xW64A	0.263752	0.880385	0.121725	0.572068	0.263752	diacid		-0.538486	0.0425593		BPH
Mo17	H84	Mo17xH84	0.263752	0.239146	0.0968375	0.251449	0.239146	diacid		-0.59507	0.0245281		BPH
A554	H99	A554xH99	0.544965	0.429329	0.207687	0.487147	0.429329	diacid		-0.516253	0.0289474		BPH
W64A	H84	W64AxH84	0.880385	0.239146	0.265806	0.559766	0.880385	diacid	-0.525147			0.0260909	MPH
W64A	Oh43	W64AxOh43	0.880385	0.420161	0.262368	0.650273	0.420161	diacid		-0.375553	0.0101667		BPH
Mo17	H84	Mo17xH84	0.352531	0.630383	0.57188	0.491457	0.630383	w_OH	0.163642			0.00598936	MPH
A554	H99	A554xH99	1.133	0.486634	0.55613	0.809816	1.133	w_OH	-0.313264			0.00719715	MPH
Mo17	W64A	Mo17xW64A	2.08801	3.67746	0.896525	2.88274	2.08801	methyl_monocarboxylate		-0.570632	0.0310657		BPH
Mo17	H84	Mo17xH84	2.08801	17.8665	0.978477	9.97725	2.08801	methyl_monocarboxylate		-0.531384	0.0179271		BPH
A554	H84	A554xH84	3.6161	17.8665	2.84369	10.7413	3.6161	methyl_monocarboxylate		-0.213603	0.0452259		BPH
Mo17	B73	Mo17xB73	0.0861478	0.112411	0.0744646	0.0992792	0.0861478	Alcohol		-0.135618	0.0273506		BPH
Mo17	H84	Mo17xH84	0.0861478	1.93045	0.0419441	1.0083	0.0861478	Alcohol		-0.513115	0.0245281		BPH
A554	H84	A554xH84	0.149956	1.93045	0.115128	1.0402	0.149956	Alcohol		-0.232252	0.0452259		BPH
A554	H99	A554xH99	0.149956	0.145256	0.0653208	0.147606	0.145256	Alcohol		-0.550307	0.0454318		BPH
W64A	H84	W64AxH84	0.364851	1.93045	0.136445	1.14765	0.364851	Alcohol		-0.626026	0.0130595		BPH
W64A	Oh43	W64AxOh43	0.364851	0.129467	0.0783355	0.247159	0.129467	Alcohol		-0.394938	0.0391831		BPH
Mo17	A554	Mo17xA554	22.2308	24.9396	17.9273	23.5852	22.2308	aromatics		-0.193585	0.0182049		BPH
Mo17	W64A	Mo17xW64A	22.2308	24.6394	5.69273	23.4351	22.2308	aromatics		-0.743926	0.0310657		BPH
W64A	H84	W64AxH84	24.6394	0.0783832	22.2823	12.3589	24.6394	aromatics	0.802938			0.0260909	MPH
W64A	H99	W64AxH99	24.6394	18.7523	13.8957	21.6958	18.7523	aromatics		-0.258987	0.0289955		BPH
Mo17	A554	Mo17xA554	2.79044	5.44402	3.13479	4.11723	5.44402	longchain_aliphatics	-0.238616			0.019487	MPH
Mo17	H84	Mo17xH84	2.79044	20.6665	1.68914	11.7285	2.79044	longchain_aliphatics		-0.39467	0.0179271		BPH
A554	H84	A554xH84	5.44402	20.6665	3.94302	13.0552	5.44402	longchain_aliphatics		-0.275716	0.0452259		BPH
W64A	H84	W64AxH84	5.38242	20.6665	3.58469	13.0244	5.38242	longchain_aliphatics		-0.334001	0.0130595		BPH

## Sheet: Table S4
Table S4 Differentally abundant bacterial ASVs between hybrids and inbred lines under each soil condition. CK: control soil; LN: low nitrogen soil; LP: low phosphorus soil
baseMean	log2FoldChange	lfcSE	stat	pvalue	padj	ASVid	Kingdom	Phylum	Class	Order	Family	Genus	Species	Confidence	Treatment
7.4636	-2.64068	0.25307	-10.4346	1.72373e-25	3.66293e-23	bASV240	Bacteria	Proteobacteria	Alphaproteobacteria	Rhizobiales	Devosiaceae	Devosia	Unidentified	0.8441042	CK
6.33373	-2.59847	0.230742	-11.2613	2.03617e-29	1.38569e-26	bASV306	Bacteria	Firmicutes	Bacilli	Paenibacillales	Paenibacillaceae	Paenibacillus	Unidentified	0.9999933	CK
6.20483	-2.57581	0.237442	-10.8481	2.03514e-27	5.76622e-25	bASV316	Bacteria	Proteobacteria	Gammaproteobacteria	Burkholderiales	Sutterellaceae	uncultured	Unidentified	0.9999994	CK
5.8831	-2.46507	0.219707	-11.2198	3.26046e-29	1.38569e-26	bASV369	Bacteria	Proteobacteria	Alphaproteobacteria	Rhizobiales	Beijerinckiaceae	alphaI_cluster	Unidentified	0.9450716	CK
14.8519	-1.41301	0.43393	-3.25631	0.00112871	0.0080522	bASV1228	Bacteria	Bdellovibrionota	Oligoflexia	0319-6G20	0319-6G20	0319-6G20	uncultured_Syntrophobacteraceae	0.7088640	CK
5.34259	-1.07579	0.306414	-3.51089	0.000446616	0.0285696	bASV1871	Bacteria	Myxococcota	Polyangia	Polyangiales	Polyangiaceae	Pajaroellobacter	metagenome	0.8502882	LP
5.58962	-1.27954	0.318191	-4.02127	5.7884e-05	0.000647387	bASV968	Bacteria	Actinobacteriota	Actinobacteria	Corynebacteriales	Mycobacteriaceae	Mycobacterium	Unidentified	0.9999938	CK
32.2906	-1.09115	0.293604	-3.71639	0.000202087	0.00178932	bASV479	Bacteria	Acidobacteriota	Vicinamibacteria	Vicinamibacterales	uncultured	uncultured	Unidentified	0.9999674	CK
6.44168	-1.07242	0.342451	-3.13159	0.00173865	0.0112813	bASV1164	Bacteria	Proteobacteria	Alphaproteobacteria	Rhizobiales	Xanthobacteraceae	Bradyrhizobium	Unidentified	0.7139662	CK
5.76325	-1.00035	0.273022	-3.66398	0.000248325	0.0285696	bASV952	Bacteria	Proteobacteria	Alphaproteobacteria	Sphingomonadales	Sphingomonadaceae	Ellin6055	Unidentified	0.9426752	LP
9.18031	-1.01518	0.371829	-2.73023	0.00632898	0.0310654	bASV1347	Bacteria	Actinobacteriota	Thermoleophilia	uncultured	uncultured	uncultured	uncultured_bacterium	1.0000000	CK
61.833	-0.335169	0.0686355	-4.88332	1.04314e-06	0.000677358	bASV381	Bacteria	Proteobacteria	Alphaproteobacteria	Rhizobiales	Rhizobiaceae	Allorhizobium-Neorhizobium-Pararhizobium-Rhizobium	Unidentified	0.9969594	LP
9.96714	-1.25026	0.311636	-4.01192	6.02271e-05	0.00132345	bASV968	Bacteria	Actinobacteriota	Actinobacteria	Corynebacteriales	Mycobacteriaceae	Mycobacterium	Unidentified	0.9999938	LN
4.25569	-1.21639	0.231705	-5.24974	1.52312e-07	1.45035e-05	bASV943	Bacteria	Proteobacteria	Gammaproteobacteria	Xanthomonadales	Xanthomonadaceae	Unidentified	Unidentified	0.9999919	LN
4.39618	-1.17444	0.306005	-3.83797	0.000124056	0.00231122	bASV2157	Bacteria	Verrucomicrobiota	Verrucomicrobiae	Chthoniobacterales	Xiphinematobacteraceae	Candidatus_Xiphinematobacter	uncultured_bacterium	0.9325617	LN
55.5031	-0.284745	0.0777042	-3.66448	0.000247844	0.0285696	bASV479	Bacteria	Acidobacteriota	Vicinamibacteria	Vicinamibacterales	uncultured	uncultured	Unidentified	0.9999674	LP
5.38695	-0.984844	0.307134	-3.20656	0.00134334	0.0157168	bASV1064	Bacteria	Acidobacteriota	Vicinamibacteria	Vicinamibacterales	uncultured	uncultured	Unidentified	0.9999973	LN
11.7647	-0.714068	0.210688	-3.38923	0.000700898	0.00968822	bASV603	Bacteria	Bacteroidota	Bacteroidia	Chitinophagales	Chitinophagaceae	Flavisolibacter	Unidentified	0.9372460	LN
71.5024	-0.241404	0.0503194	-4.79745	1.60702e-06	0.000677358	bASV188	Bacteria	Proteobacteria	Alphaproteobacteria	Sphingomonadales	Sphingomonadaceae	Sphingomonas	Unidentified	0.9942877	LP
5.34902	-0.665615	0.215363	-3.09066	0.00199714	0.020475	bASV874	Bacteria	Actinobacteriota	Thermoleophilia	Solirubrobacterales	67-14	67-14	uncultured_bacterium	0.7712988	LN
39.1989	-0.646118	0.0877549	-7.36276	1.80147e-13	1.54386e-10	bASV381	Bacteria	Proteobacteria	Alphaproteobacteria	Rhizobiales	Rhizobiaceae	Allorhizobium-Neorhizobium-Pararhizobium-Rhizobium	Unidentified	0.9969594	LN
8.54584	-0.974497	0.367472	-2.65189	0.0080042	0.0373823	bASV1433	Bacteria	Acidobacteriota	Thermoanaerobaculia	Thermoanaerobaculales	Thermoanaerobaculaceae	Subgroup_10	uncultured_bacterium	0.7422608	CK
4.68805	-0.944576	0.238473	-3.96094	7.46558e-05	0.000813557	bASV1121	Bacteria	Proteobacteria	Alphaproteobacteria	Sphingomonadales	Sphingomonadaceae	Ellin6055	Unidentified	0.8499958	CK
12.8025	-0.930606	0.344794	-2.69902	0.00695436	0.0332741	bASV887	Bacteria	Proteobacteria	Gammaproteobacteria	Burkholderiales	Comamonadaceae	Unidentified	Unidentified	0.9999992	CK
11.888	-0.90412	0.346722	-2.60762	0.00911746	0.0410753	bASV1127	Bacteria	Proteobacteria	Gammaproteobacteria	Steroidobacterales	Steroidobacteraceae	uncultured	Unidentified	0.9999991	CK
18.6168	-0.69547	0.227356	-3.05895	0.00222112	0.0137807	bASV786	Bacteria	Actinobacteriota	Actinobacteria	Corynebacteriales	Mycobacteriaceae	Mycobacterium	Unidentified	0.9999950	CK
50.3028	-0.56433	0.0786758	-7.17284	7.34559e-13	6.24375e-11	bASV381	Bacteria	Proteobacteria	Alphaproteobacteria	Rhizobiales	Rhizobiaceae	Allorhizobium-Neorhizobium-Pararhizobium-Rhizobium	Unidentified	0.9969594	CK
118.724	-0.37273	0.0537307	-6.937	4.00503e-12	2.61868e-10	bASV80	Bacteria	Actinobacteriota	MB-A2-108	MB-A2-108	MB-A2-108	MB-A2-108	metagenome	0.7379325	CK
111.656	-0.350353	0.110581	-3.1683	0.00153334	0.0101034	bASV116	Bacteria	Proteobacteria	Alphaproteobacteria	Rhizobiales	Methyloligellaceae	uncultured	metagenome	0.9179796	CK
49.7439	-0.325548	0.077022	-4.22669	2.3715e-05	0.000287967	bASV315	Bacteria	Proteobacteria	Alphaproteobacteria	Rhizobiales	Hyphomicrobiaceae	Hyphomicrobium	Unidentified	0.9825675	CK
34.0513	-0.325369	0.120221	-2.70643	0.00680104	0.0328459	bASV486	Bacteria	Acidobacteriota	Thermoanaerobaculia	Thermoanaerobaculales	Thermoanaerobaculaceae	Subgroup_10	uncultured_bacterium	0.7230550	CK
53.3203	-0.316844	0.0739318	-4.28563	1.82224e-05	0.000238293	bASV367	Bacteria	Proteobacteria	Gammaproteobacteria	Burkholderiales	Oxalobacteraceae	Massilia	Unidentified	0.9996638	CK
279.356	-0.439634	0.0896397	-4.90446	9.36868e-07	4.36882e-05	bASV21	Bacteria	Bacteroidota	Bacteroidia	Chitinophagales	Chitinophagaceae	Flaviaesturariibacter	uncultured_bacterium	0.7073935	LN
153.282	-0.313672	0.0482884	-6.4958	8.25909e-11	4.12955e-09	bASV65	Bacteria	Proteobacteria	Alphaproteobacteria	Rhizobiales	Methyloligellaceae	uncultured	Unidentified	0.9817636	CK
144.157	-0.286335	0.0733095	-3.90583	9.39022e-05	0.00093439	bASV110	Bacteria	Firmicutes	Bacilli	Bacillales	Bacillaceae	Bacillus	Unidentified	0.9868952	CK
87.4837	-0.278176	0.0714685	-3.89229	9.93045e-05	0.000970216	bASV147	Bacteria	Actinobacteriota	Actinobacteria	Corynebacteriales	Mycobacteriaceae	Mycobacterium	Unidentified	0.9999958	CK
65.2078	-0.277004	0.0513967	-5.38952	7.06442e-08	1.71565e-06	bASV216	Bacteria	Proteobacteria	Alphaproteobacteria	Rhizobiales	Methyloligellaceae	uncultured	Unidentified	0.9989962	CK
144.086	-0.271765	0.0418006	-6.50146	7.95461e-11	4.12955e-09	bASV68	Bacteria	Proteobacteria	Alphaproteobacteria	Rhizobiales	Rhizobiaceae	Unidentified	Unidentified	0.9962014	CK
249.595	-0.259966	0.0445619	-5.83382	5.41732e-09	1.64454e-07	bASV30	Bacteria	Proteobacteria	Gammaproteobacteria	Xanthomonadales	Xanthomonadaceae	Luteimonas	Unidentified	0.7968985	CK
149.432	-0.257324	0.0417532	-6.16298	7.13886e-10	2.75819e-08	bASV75	Bacteria	Proteobacteria	Alphaproteobacteria	Sphingomonadales	Sphingomonadaceae	Sphingomonas	Unidentified	0.9999794	CK
44.1629	-0.257191	0.0724278	-3.551	0.00038377	0.00304864	bASV322	Bacteria	Proteobacteria	Alphaproteobacteria	Rhizobiales	Hyphomicrobiaceae	Pedomicrobium	Unidentified	0.9974798	CK
39.7962	-0.25691	0.064238	-3.99935	6.3516e-05	0.000701151	bASV427	Bacteria	Proteobacteria	Alphaproteobacteria	Rhizobiales	Rhizobiaceae	Mesorhizobium	Unidentified	0.9888237	CK
27.6139	-0.428458	0.108489	-3.94932	7.83735e-05	0.00159919	bASV503	Bacteria	Actinobacteriota	Thermoleophilia	Gaiellales	Gaiellaceae	Gaiella	metagenome	0.7869546	LN
826.974	-0.256657	0.0401125	-6.39844	1.56968e-10	7.41238e-09	bASV7	Bacteria	Proteobacteria	Alphaproteobacteria	Rhizobiales	Methyloligellaceae	uncultured	Unidentified	0.9474687	CK
62.6571	-0.253443	0.0648715	-3.90685	9.3509e-05	0.00093439	bASV185	Bacteria	Actinobacteriota	Actinobacteria	Propionibacteriales	Nocardioidaceae	Aeromicrobium	uncultured_bacterium	0.9372836	CK
124.359	-0.242498	0.0545971	-4.4416	8.92926e-06	0.00013086	bASV63	Bacteria	Actinobacteriota	MB-A2-108	MB-A2-108	MB-A2-108	MB-A2-108	metagenome	0.7783268	CK
61.1612	-0.239027	0.0482023	-4.95883	7.09172e-07	1.40185e-05	bASV266	Bacteria	Proteobacteria	Alphaproteobacteria	Rhizobiales	Xanthobacteraceae	uncultured	Unidentified	0.9959241	CK
55.504	-0.402026	0.137584	-2.92203	0.00347756	0.031705	bASV304	Bacteria	Acidobacteriota	Acidobacteriae	Bryobacterales	Bryobacteraceae	Bryobacter	Unidentified	0.9991942	LN
27.3937	-0.23607	0.0723793	-3.26157	0.00110795	0.00798103	bASV628	Bacteria	Proteobacteria	Alphaproteobacteria	Rhizobiales	Beijerinckiaceae	Bosea	Unidentified	0.9999992	CK
40.3669	-0.227877	0.066776	-3.41255	0.00064357	0.00492823	bASV458	Bacteria	Actinobacteriota	Thermoleophilia	Gaiellales	uncultured	uncultured	uncultured_microorganism	0.9630068	CK
22.6818	-0.225312	0.0781453	-2.88324	0.00393605	0.0211749	bASV596	Bacteria	Proteobacteria	Gammaproteobacteria	Nitrosococcales	Nitrosococcaceae	wb1-P19	uncultured_bacterium	0.9995055	CK
67.3198	-0.22059	0.0684935	-3.22059	0.00127925	0.00874982	bASV172	Bacteria	Actinobacteriota	Actinobacteria	Propionibacteriales	Nocardioidaceae	Nocardioides	Unidentified	0.9911986	CK
55.5198	-0.219181	0.0816496	-2.68441	0.00726576	0.0343105	bASV358	Bacteria	Proteobacteria	Alphaproteobacteria	Sphingomonadales	Sphingomonadaceae	Sphingomonas	Unidentified	0.9969935	CK
30.5001	-0.218956	0.0680216	-3.21892	0.00128674	0.00874982	bASV551	Bacteria	Proteobacteria	Gammaproteobacteria	Burkholderiales	SC-I-84	SC-I-84	Unidentified	0.9997214	CK
307.134	-0.217512	0.0330988	-6.5716	4.97779e-11	2.82074e-09	bASV17	Bacteria	Proteobacteria	Alphaproteobacteria	Sphingomonadales	Sphingomonadaceae	Sphingomonas	Unidentified	0.9981729	CK
43.9996	-0.215067	0.0660873	-3.25429	0.00113678	0.0080522	bASV426	Bacteria	Myxococcota	Polyangia	Polyangiales	Sandaracinaceae	uncultured	metagenome	0.9481265	CK
28.006	-0.214145	0.0834642	-2.56571	0.0102964	0.0453466	bASV610	Bacteria	Proteobacteria	Alphaproteobacteria	Rhizobiales	Xanthobacteraceae	uncultured	Unidentified	0.9628129	CK
73.6662	-0.385917	0.0753565	-5.12122	3.03569e-07	2.36508e-05	bASV199	Bacteria	Bacteroidota	Bacteroidia	Sphingobacteriales	Sphingobacteriaceae	Pedobacter	Unidentified	0.7641715	LN
66.2309	-0.207905	0.0474571	-4.3809	1.18189e-05	0.000164689	bASV255	Bacteria	Acidobacteriota	Subgroup_25	Subgroup_25	Subgroup_25	Subgroup_25	uncultured_bacterium	0.9721436	CK
38.433	-0.206095	0.0626187	-3.29128	0.000997335	0.00724559	bASV402	Bacteria	Actinobacteriota	Thermoleophilia	Gaiellales	uncultured	uncultured	Unidentified	0.8278479	CK
37.3999	-0.20454	0.0656816	-3.11412	0.00184496	0.0117031	bASV497	Bacteria	Proteobacteria	Alphaproteobacteria	Rhizobiales	Hyphomicrobiaceae	Hyphomicrobium	Unidentified	0.9851461	CK
27.2319	-0.37317	0.125052	-2.98411	0.00284402	0.0267838	bASV520	Bacteria	Bacteroidota	Bacteroidia	Chitinophagales	Chitinophagaceae	Flavitalea	Unidentified	0.9998572	LN
25.5152	-0.202381	0.0720105	-2.81044	0.00494736	0.0250313	bASV594	Bacteria	Gemmatimonadota	AKAU4049	AKAU4049	AKAU4049	AKAU4049	uncultured_bacterium	0.9999837	CK
90.676	-0.20046	0.0439669	-4.55934	5.13138e-06	7.93031e-05	bASV159	Bacteria	Actinobacteriota	Actinobacteria	Propionibacteriales	Nocardioidaceae	Nocardioides	uncultured_organism	0.8684349	CK
86.2102	-0.194943	0.0483073	-4.03548	5.44918e-05	0.000620371	bASV176	Bacteria	Actinobacteriota	Thermoleophilia	Gaiellales	Gaiellaceae	Gaiella	metagenome	0.9853568	CK
59.093	-0.194276	0.0520265	-3.73418	0.000188327	0.00168503	bASV336	Bacteria	Proteobacteria	Gammaproteobacteria	Steroidobacterales	Steroidobacteraceae	uncultured	Unidentified	0.9999995	CK
20.2226	-0.357726	0.096921	-3.69091	0.000223456	0.00368273	bASV716	Bacteria	Bacteroidota	Bacteroidia	Chitinophagales	Chitinophagaceae	Flavisolibacter	uncultured_bacterium	0.7417909	LN
20.6327	-0.34187	0.0989559	-3.45477	0.000550754	0.00786661	bASV490	Bacteria	Chloroflexi	Chloroflexia	Chloroflexales	Roseiflexaceae	uncultured	Unidentified	1.0000000	LN
27.6273	-0.341241	0.0952418	-3.58289	0.000339812	0.0052949	bASV504	Bacteria	Actinobacteriota	Actinobacteria	Propionibacteriales	Nocardioidaceae	Nocardioides	Unidentified	0.9597208	LN
47.2219	-0.188315	0.0722337	-2.60703	0.00913322	0.0410753	bASV379	Bacteria	Proteobacteria	Alphaproteobacteria	Rhizobiales	Hyphomicrobiaceae	Pedomicrobium	Unidentified	0.9983707	CK
72.0119	-0.185002	0.0539356	-3.43005	0.000603477	0.00466323	bASV188	Bacteria	Proteobacteria	Alphaproteobacteria	Sphingomonadales	Sphingomonadaceae	Sphingomonas	Unidentified	0.9942877	CK
40.3495	-0.340917	0.0945947	-3.60398	0.000313387	0.00497356	bASV417	Bacteria	Actinobacteriota	Actinobacteria	Frankiales	uncultured	uncultured	Unidentified	0.9995522	LN
84.8834	-0.183131	0.0505539	-3.62249	0.00029178	0.0024079	bASV164	Bacteria	Methylomirabilota	Methylomirabilia	Rokubacteriales	Rokubacteriales	Rokubacteriales	uncultured_bacterium	0.9999002	CK
96.3404	-0.179341	0.0627135	-2.85968	0.00424063	0.0225283	bASV145	Bacteria	Actinobacteriota	Thermoleophilia	Solirubrobacterales	67-14	67-14	Unidentified	0.9657260	CK
48.1442	-0.310984	0.0563403	-5.51974	3.39501e-08	5.86387e-06	bASV302	Bacteria	Bacteroidota	Bacteroidia	Chitinophagales	Chitinophagaceae	Unidentified	Unidentified	1.0000000	LN
188.081	-0.177262	0.0454028	-3.9042	9.45383e-05	0.00093439	bASV43	Bacteria	Actinobacteriota	Thermoleophilia	Gaiellales	Gaiellaceae	Gaiella	Unidentified	0.9863302	CK
121.369	-0.175062	0.0444734	-3.93634	8.27322e-05	0.000868178	bASV117	Bacteria	Proteobacteria	Alphaproteobacteria	Sphingomonadales	Sphingomonadaceae	Sphingomonas	Unidentified	0.9937299	CK
30.0392	-0.172945	0.0669801	-2.58204	0.00982171	0.0434815	bASV661	Bacteria	Proteobacteria	Alphaproteobacteria	Rhizobiales	Rhizobiales_Incertae_Sedis	Nordella	Unidentified	0.9999991	CK
230.69	-0.170539	0.0439962	-3.87622	0.00010609	0.00102474	bASV27	Bacteria	Actinobacteriota	Thermoleophilia	Gaiellales	uncultured	uncultured	Unidentified	0.9999334	CK
100.867	-0.16993	0.0488366	-3.47956	0.000502245	0.00391659	bASV167	Bacteria	Actinobacteriota	Actinobacteria	Streptomycetales	Streptomycetaceae	Streptomyces	Unidentified	0.9999485	CK
70.3932	-0.167151	0.0576008	-2.90189	0.00370915	0.0205005	bASV200	Bacteria	Actinobacteriota	Actinobacteria	Propionibacteriales	Nocardioidaceae	Marmoricola	Unidentified	0.8292980	CK
70.4138	-0.305911	0.0509515	-6.00396	1.92565e-09	5.50094e-07	bASV187	Bacteria	Bacteroidota	Bacteroidia	Chitinophagales	Chitinophagaceae	uncultured	Unidentified	0.9987538	LN
50.8355	-0.303857	0.061525	-4.93875	7.86257e-07	4.36882e-05	bASV201	Bacteria	Actinobacteriota	Actinobacteria	Micrococcales	Intrasporangiaceae	Terrabacter	Unidentified	0.9963314	LN
68.5626	-0.270324	0.0971594	-2.78227	0.00539797	0.0433651	bASV257	Bacteria	Actinobacteriota	Actinobacteria	Propionibacteriales	Nocardioidaceae	Nocardioides	Unidentified	0.9862792	LN
61.0761	-0.164012	0.052616	-3.11715	0.00182608	0.0116705	bASV291	Bacteria	Proteobacteria	Alphaproteobacteria	Rhizobiales	uncultured	uncultured	Unidentified	0.9999997	CK
72.1568	-0.266678	0.0596839	-4.46817	7.88918e-06	0.000250408	bASV197	Bacteria	Bacteroidota	Bacteroidia	Chitinophagales	Chitinophagaceae	Flavitalea	Unidentified	0.9999521	LN
259.721	-0.162311	0.0339469	-4.78131	1.74157e-06	3.28962e-05	bASV24	Bacteria	Actinobacteriota	Thermoleophilia	Gaiellales	uncultured	uncultured	Unidentified	0.9986296	CK
102.62	-0.160899	0.0434073	-3.70672	0.000209958	0.00183157	bASV142	Bacteria	Proteobacteria	Gammaproteobacteria	PLTA13	PLTA13	PLTA13	Unidentified	1.0000000	CK
181.452	-0.262022	0.0480921	-5.44835	5.08404e-08	7.26171e-06	bASV30	Bacteria	Proteobacteria	Gammaproteobacteria	Xanthomonadales	Xanthomonadaceae	Luteimonas	Unidentified	0.7968985	LN
53.9762	-0.158459	0.0491183	-3.22607	0.00125505	0.00867308	bASV326	Bacteria	Acidobacteriota	Acidobacteriae	Acidobacteriales	uncultured	uncultured	Unidentified	0.9985884	CK
89.7775	-0.152499	0.054769	-2.78441	0.00536251	0.0266557	bASV161	Bacteria	Actinobacteriota	Actinobacteria	Propionibacteriales	Nocardioidaceae	Marmoricola	Unidentified	0.9716331	CK
103.961	-0.254224	0.0460685	-5.51839	3.42116e-08	5.86387e-06	bASV82	Bacteria	Actinobacteriota	Thermoleophilia	Gaiellales	Gaiellaceae	Gaiella	actinobacterium_WWH12	0.8495998	LN
207.727	-0.151166	0.0391872	-3.85753	0.000114537	0.00106985	bASV39	Bacteria	Proteobacteria	Alphaproteobacteria	Sphingomonadales	Sphingomonadaceae	Sphingomonas	Unidentified	0.9968156	CK
140.045	-0.148238	0.0447227	-3.31459	0.000917764	0.00678348	bASV86	Bacteria	Proteobacteria	Alphaproteobacteria	Dongiales	Dongiaceae	Dongia	uncultured_bacterium	0.7107435	CK
207.777	-0.144181	0.0389125	-3.70527	0.000211169	0.00183157	bASV46	Bacteria	Myxococcota	Myxococcia	Myxococcales	Myxococcaceae	Unidentified	Unidentified	0.9987843	CK
40.3599	-0.143831	0.0547202	-2.62849	0.0085766	0.0396202	bASV411	Bacteria	Actinobacteriota	Acidimicrobiia	IMCC26256	IMCC26256	IMCC26256	Unidentified	0.9999962	CK
74.0624	-0.143193	0.0493561	-2.90121	0.00371719	0.0205005	bASV297	Bacteria	Myxococcota	Polyangia	Polyangiales	Sandaracinaceae	uncultured	Unidentified	0.9999939	CK
407.873	-0.140768	0.0332103	-4.23869	2.24829e-05	0.000281036	bASV15	Bacteria	Proteobacteria	Alphaproteobacteria	Rhizobiales	Xanthobacteraceae	uncultured	Unidentified	0.7502583	CK
179.805	-0.140514	0.0478434	-2.93696	0.00331451	0.0188557	bASV53	Bacteria	Actinobacteriota	Actinobacteria	Propionibacteriales	Nocardioidaceae	Unidentified	Unidentified	0.9999944	CK
38.809	-0.253813	0.0616162	-4.11926	3.80083e-05	0.000904809	bASV364	Bacteria	Acidobacteriota	Blastocatellia	Blastocatellales	Blastocatellaceae	Unidentified	Unidentified	0.9999957	LN
37.7855	-0.253327	0.0551757	-4.59128	4.4054e-06	0.000154754	bASV362	Bacteria	Actinobacteriota	Thermoleophilia	Gaiellales	Gaiellaceae	Gaiella	Unidentified	0.9599046	LN
87.7423	-0.135267	0.0468134	-2.8895	0.00385853	0.021024	bASV189	Bacteria	Proteobacteria	Gammaproteobacteria	Xanthomonadales	Xanthomonadaceae	Arenimonas	Unidentified	0.9999997	CK
143.029	-0.134215	0.0397333	-3.37791	0.000730392	0.0054941	bASV104	Bacteria	Actinobacteriota	Thermoleophilia	Gaiellales	Gaiellaceae	Gaiella	Unidentified	0.9959326	CK
29.9938	-0.250405	0.0889203	-2.81606	0.00486172	0.040848	bASV534	Bacteria	Actinobacteriota	Thermoleophilia	Gaiellales	uncultured	uncultured	uncultured_Rubrobacterales	0.9337787	LN
186.626	-0.132229	0.0416404	-3.1755	0.00149578	0.00993294	bASV56	Bacteria	Firmicutes	Clostridia	Clostridiales	Clostridiaceae	Clostridium_sensu_stricto_13	Unidentified	0.9906933	CK
124.405	-0.127607	0.0469931	-2.71544	0.00661873	0.0321481	bASV97	Bacteria	Proteobacteria	Alphaproteobacteria	Rhizobiales	Rhizobiaceae	Mesorhizobium	Unidentified	0.7039288	CK
425.907	-0.125837	0.0360497	-3.49064	0.000481856	0.00379239	bASV14	Bacteria	Nitrospirota	Nitrospiria	Nitrospirales	Nitrospiraceae	Nitrospira	Unidentified	1.0000000	CK
917.549	-0.121937	0.0315559	-3.86415	0.000111476	0.00105283	bASV6	Bacteria	Proteobacteria	Alphaproteobacteria	Rhizobiales	Xanthobacteraceae	Bradyrhizobium	Unidentified	0.8019381	CK
324.394	-0.119994	0.0327031	-3.66918	0.000243334	0.00206044	bASV19	Bacteria	Proteobacteria	Gammaproteobacteria	Steroidobacterales	Steroidobacteraceae	uncultured	Unidentified	0.9999960	CK
1612.45	-0.11771	0.0439981	-2.67534	0.00746542	0.0350586	bASV3	Bacteria	Actinobacteriota	Actinobacteria	Micrococcales	Micrococcaceae	Unidentified	Unidentified	0.9999996	CK
112.514	-0.108059	0.0381818	-2.83012	0.00465309	0.0242646	bASV152	Bacteria	Actinobacteriota	Actinobacteria	Streptomycetales	Streptomycetaceae	Streptomyces	Unidentified	0.9997969	CK
149.833	-0.248672	0.0479493	-5.18614	2.14693e-07	1.83992e-05	bASV48	Bacteria	Acidobacteriota	Acidobacteriae	Bryobacterales	Bryobacteraceae	Bryobacter	Unidentified	0.9992590	LN
448.245	-0.0938107	0.0332908	-2.81792	0.00483365	0.0250032	bASV13	Bacteria	Proteobacteria	Gammaproteobacteria	Steroidobacterales	Steroidobacteraceae	Steroidobacter	Unidentified	0.9224952	CK
215.818	0.125392	0.0482953	2.59635	0.00942201	0.0419304	bASV47	Bacteria	Acidobacteriota	Vicinamibacteria	Vicinamibacterales	Vicinamibacteraceae	Vicinamibacteraceae	Unidentified	0.9991287	CK
32.2638	-0.243767	0.0682637	-3.57096	0.000355677	0.00544313	bASV418	Bacteria	Proteobacteria	Gammaproteobacteria	Burkholderiales	Oxalobacteraceae	Noviherbaspirillum	Unidentified	0.9465015	LN
154.843	0.149784	0.0396929	3.77358	0.000160924	0.00147081	bASV98	Bacteria	Proteobacteria	Gammaproteobacteria	Burkholderiales	Comamonadaceae	Unidentified	Unidentified	0.9999999	CK
171.341	0.150025	0.0537696	2.79014	0.00526845	0.0263423	bASV66	Bacteria	Actinobacteriota	MB-A2-108	MB-A2-108	MB-A2-108	MB-A2-108	uncultured_bacterium	0.9154968	CK
120.456	0.152138	0.054116	2.81133	0.00493366	0.0250313	bASV153	Bacteria	Proteobacteria	Gammaproteobacteria	Gammaproteobacteria_Incertae_Sedis	Unknown_Family	Acidibacter	Unidentified	0.9996797	CK
88.328	-0.241777	0.0495997	-4.87457	1.09047e-06	4.67267e-05	bASV75	Bacteria	Proteobacteria	Alphaproteobacteria	Sphingomonadales	Sphingomonadaceae	Sphingomonas	Unidentified	0.9999794	LN
227.308	0.155707	0.0594957	2.61712	0.00886758	0.0403677	bASV33	Bacteria	Acidobacteriota	Blastocatellia	Pyrinomonadales	Pyrinomonadaceae	RB41	Unidentified	0.9850726	CK
58.3223	0.156984	0.0559686	2.80487	0.00503373	0.0253176	bASV409	Bacteria	Actinobacteriota	Actinobacteria	Micrococcales	Intrasporangiaceae	Unidentified	Unidentified	0.9999286	CK
93.7223	-0.241028	0.0623248	-3.8673	0.000110048	0.00214344	bASV124	Bacteria	Acidobacteriota	Vicinamibacteria	Vicinamibacterales	Vicinamibacteraceae	Vicinamibacteraceae	Unidentified	0.7796684	LN
71.7993	-0.235209	0.0440541	-5.3391	9.34079e-08	1.14358e-05	bASV176	Bacteria	Actinobacteriota	Thermoleophilia	Gaiellales	Gaiellaceae	Gaiella	metagenome	0.9853568	LN
49.3982	-0.233762	0.0572712	-4.08167	4.4713e-05	0.00103565	bASV308	Bacteria	Proteobacteria	Gammaproteobacteria	Burkholderiales	Oxalobacteraceae	Unidentified	Unidentified	0.9980662	LN
60.5212	0.15735	0.0617464	2.54833	0.010824	0.0472364	bASV418	Bacteria	Proteobacteria	Gammaproteobacteria	Burkholderiales	Oxalobacteraceae	Noviherbaspirillum	Unidentified	0.9465015	CK
80.082	0.158344	0.0535515	2.95685	0.00310795	0.0180675	bASV260	Bacteria	Actinobacteriota	Thermoleophilia	Gaiellales	uncultured	uncultured	Unidentified	0.9930417	CK
94.5153	-0.227643	0.0489971	-4.64605	3.38355e-06	0.000126074	bASV127	Bacteria	Acidobacteriota	Acidobacteriae	Bryobacterales	Bryobacteraceae	Bryobacter	Unidentified	0.9994406	LN
54.2937	-0.225827	0.0513246	-4.39999	1.08258e-05	0.000331345	bASV269	Bacteria	Chloroflexi	Anaerolineae	Anaerolineales	Anaerolineaceae	Anaerolinea	Unidentified	0.9640354	LN
195.787	-0.223998	0.0443218	-5.05389	4.32896e-07	3.0916e-05	bASV44	Bacteria	Actinobacteriota	Actinobacteria	Propionibacteriales	Nocardioidaceae	Nocardioides	Unidentified	0.9685058	LN
59.751	-0.223145	0.0492415	-4.53164	5.85267e-06	0.000192913	bASV217	Bacteria	Actinobacteriota	Actinobacteria	Propionibacteriales	Nocardioidaceae	Nocardioides	Unidentified	0.9974970	LN
46.3908	-0.208794	0.056269	-3.71065	0.00020673	0.00354334	bASV297	Bacteria	Myxococcota	Polyangia	Polyangiales	Sandaracinaceae	uncultured	Unidentified	0.9999939	LN
83.5862	0.159166	0.0556122	2.86208	0.00420873	0.0224995	bASV195	Bacteria	Acidobacteriota	Vicinamibacteria	Vicinamibacterales	Vicinamibacteraceae	Vicinamibacteraceae	Unidentified	0.9998686	CK
88.7373	0.161426	0.0616544	2.61824	0.00883846	0.0403677	bASV222	Bacteria	Acidobacteriota	Blastocatellia	Blastocatellales	Blastocatellaceae	uncultured	uncultured_Acidobacteria	0.7686095	CK
47.9604	-0.207011	0.0472986	-4.37669	1.20495e-05	0.000356083	bASV300	Bacteria	Actinobacteriota	Thermoleophilia	Gaiellales	Gaiellaceae	Gaiella	Unidentified	0.9910236	LN
36.057	0.168662	0.063791	2.64398	0.0081937	0.0380582	bASV562	Bacteria	Gemmatimonadota	Gemmatimonadetes	Gemmatimonadales	Gemmatimonadaceae	uncultured	uncultured_Pseudomonadales	0.8536524	CK
95.1083	-0.202447	0.0467962	-4.32614	1.51745e-05	0.000406391	bASV135	Bacteria	Acidobacteriota	Vicinamibacteria	Vicinamibacterales	uncultured	uncultured	Unidentified	0.9999937	LN
217.069	0.169536	0.0383087	4.42552	9.62112e-06	0.000138609	bASV52	Bacteria	Proteobacteria	Alphaproteobacteria	Azospirillales	uncultured	uncultured	uncultured_bacterium	0.9737621	CK
85.1037	0.175449	0.0623511	2.81388	0.00489469	0.0250313	bASV289	Bacteria	Proteobacteria	Alphaproteobacteria	Azospirillales	Azospirillaceae	Skermanella	Unidentified	0.9998440	CK
62.6704	0.177738	0.0605767	2.9341	0.00334517	0.0188557	bASV350	Bacteria	Actinobacteriota	Rubrobacteria	Rubrobacterales	Rubrobacteriaceae	Rubrobacter	uncultured_bacterium	0.7130881	CK
135.914	0.178223	0.0572868	3.11107	0.00186413	0.0117371	bASV135	Bacteria	Acidobacteriota	Vicinamibacteria	Vicinamibacterales	uncultured	uncultured	Unidentified	0.9999937	CK
85.7335	0.181718	0.0570226	3.18678	0.00143868	0.00962899	bASV236	Bacteria	Myxococcota	bacteriap25	bacteriap25	bacteriap25	bacteriap25	metagenome	1.0000000	CK
63.8996	0.182256	0.0641336	2.84182	0.00448571	0.0236823	bASV371	Bacteria	Bacteroidota	Bacteroidia	Cytophagales	Microscillaceae	uncultured	Unidentified	0.9216678	CK
164.444	0.182527	0.0644748	2.83099	0.00464044	0.0242646	bASV94	Bacteria	Actinobacteriota	MB-A2-108	MB-A2-108	MB-A2-108	MB-A2-108	Unidentified	0.9999996	CK
62.3481	-0.201691	0.0465584	-4.332	1.47758e-05	0.000406391	bASV239	Bacteria	Actinobacteriota	Actinobacteria	Propionibacteriales	Nocardioidaceae	Nocardioides	Marmoricola_sp.	0.7867461	LN
92.2151	0.183336	0.0682778	2.68516	0.00724958	0.0343105	bASV178	Bacteria	Acidobacteriota	Vicinamibacteria	Vicinamibacterales	uncultured	uncultured	uncultured_Acidobacteriaceae	0.7960495	CK
232.336	-0.239374	0.0689278	-3.47282	0.000515019	0.0289441	bASV21	Bacteria	Bacteroidota	Bacteroidia	Chitinophagales	Chitinophagaceae	Flaviaesturariibacter	uncultured_bacterium	0.7073935	LP
91.3276	0.184392	0.0518209	3.55825	0.00037334	0.00302227	bASV209	Bacteria	Verrucomicrobiota	Verrucomicrobiae	Pedosphaerales	Pedosphaeraceae	Unidentified	Unidentified	1.0000000	CK
84.1203	0.184488	0.0603743	3.05574	0.00224508	0.0138284	bASV302	Bacteria	Bacteroidota	Bacteroidia	Chitinophagales	Chitinophagaceae	Unidentified	Unidentified	1.0000000	CK
30.5505	-0.182467	0.0598782	-3.04731	0.00230903	0.0224868	bASV478	Bacteria	Actinobacteriota	Actinobacteria	Micrococcales	Cellulomonadaceae	Cellulomonas	Unidentified	0.9973058	LN
66.0063	0.184684	0.055398	3.33377	0.000856778	0.00638826	bASV346	Bacteria	Verrucomicrobiota	Verrucomicrobiae	Chthoniobacterales	Chthoniobacteraceae	Chthoniobacter	uncultured_bacterium	0.9960898	CK
52.676	0.185169	0.0678607	2.72866	0.00635927	0.0310654	bASV501	Bacteria	Bacteroidota	Bacteroidia	Cytophagales	Hymenobacteraceae	Adhaeribacter	metagenome	0.9747981	CK
122.431	-0.180371	0.0359692	-5.01459	5.31478e-07	3.50366e-05	bASV111	Bacteria	Actinobacteriota	Actinobacteria	Propionibacteriales	Nocardioidaceae	Unidentified	Unidentified	0.9998664	LN
91.859	0.19066	0.0586663	3.2499	0.00115446	0.00810984	bASV206	Bacteria	Acidobacteriota	Vicinamibacteria	Vicinamibacterales	uncultured	uncultured	Unidentified	0.9991585	CK
119.369	-0.165462	0.0416796	-3.96987	7.19132e-05	0.00150316	bASV95	Bacteria	Actinobacteriota	Thermoleophilia	Gaiellales	Gaiellaceae	Gaiella	Unidentified	0.9994041	LN
38.4018	0.192948	0.0611424	3.15572	0.00160103	0.0104683	bASV593	Bacteria	Actinobacteriota	Thermoleophilia	Gaiellales	Gaiellaceae	Gaiella	uncultured_actinobacterium	0.7964573	CK
36.2307	0.21049	0.067507	3.11805	0.00182052	0.0116705	bASV713	Bacteria	Actinobacteriota	Acidimicrobiia	Microtrichales	Ilumatobacteraceae	uncultured	Unidentified	0.9698582	CK
46.7677	-0.165433	0.0520383	-3.17907	0.00147748	0.0166605	bASV293	Bacteria	Myxococcota	bacteriap25	bacteriap25	bacteriap25	bacteriap25	uncultured_soil	0.7431153	LN
43.4747	0.212252	0.0723501	2.93368	0.00334965	0.0188557	bASV502	Bacteria	Chloroflexi	TK10	TK10	TK10	TK10	Unidentified	1.0000000	CK
51.2456	0.219072	0.0581332	3.76846	0.00016426	0.00148533	bASV461	Bacteria	Gemmatimonadota	Gemmatimonadetes	Gemmatimonadales	Gemmatimonadaceae	Gemmatimonas	metagenome	0.7093586	CK
33.1718	0.222374	0.0730864	3.04262	0.00234526	0.0143275	bASV639	Bacteria	Gemmatimonadota	Gemmatimonadetes	Gemmatimonadales	Gemmatimonadaceae	uncultured	Unidentified	0.9999999	CK
1595.05	-0.16024	0.0453784	-3.53119	0.000413689	0.00600901	bASV3	Bacteria	Actinobacteriota	Actinobacteria	Micrococcales	Micrococcaceae	Unidentified	Unidentified	0.9999996	LN
121.582	0.229302	0.0490301	4.67676	2.91445e-06	4.97654e-05	bASV144	Bacteria	Acidobacteriota	Vicinamibacteria	Vicinamibacterales	uncultured	uncultured	uncultured_Acidobacteriaceae	0.7438549	CK
20.1475	0.230697	0.0885702	2.60468	0.00919607	0.0411403	bASV864	Bacteria	Gemmatimonadota	Gemmatimonadetes	Gemmatimonadales	Gemmatimonadaceae	uncultured	uncultured_Alphaproteobacteria	0.9850100	CK
59.5704	0.232965	0.0653305	3.56595	0.000362546	0.00296311	bASV410	Bacteria	Chloroflexi	Chloroflexia	Thermomicrobiales	JG30-KF-CM45	JG30-KF-CM45	uncultured_bacterium	0.9493354	CK
47.1166	-0.159431	0.0503508	-3.16641	0.00154332	0.017177	bASV294	Bacteria	Myxococcota	bacteriap25	bacteriap25	bacteriap25	bacteriap25	Unidentified	0.8011154	LN
189.857	-0.159356	0.0486902	-3.27287	0.00106462	0.0131759	bASV32	Bacteria	Acidobacteriota	Blastocatellia	Pyrinomonadales	Pyrinomonadaceae	RB41	Unidentified	0.9844828	LN
94.4846	-0.153403	0.0450468	-3.40542	0.000660628	0.00928128	bASV104	Bacteria	Actinobacteriota	Thermoleophilia	Gaiellales	Gaiellaceae	Gaiella	Unidentified	0.9959326	LN
48.1427	-0.20711	0.0632417	-3.27489	0.00105703	0.0468989	bASV464	Bacteria	Acidobacteriota	Vicinamibacteria	Vicinamibacterales	Vicinamibacteraceae	Unidentified	Unidentified	0.9923668	LP
68.629	-0.175183	0.0475918	-3.68095	0.000232369	0.0285696	bASV255	Bacteria	Acidobacteriota	Subgroup_25	Subgroup_25	Subgroup_25	Subgroup_25	uncultured_bacterium	0.9721436	LP
67.0291	-0.149308	0.0517599	-2.88464	0.00391865	0.0335828	bASV189	Bacteria	Proteobacteria	Gammaproteobacteria	Xanthomonadales	Xanthomonadaceae	Arenimonas	Unidentified	0.9999997	LN
70.5796	0.238832	0.0610032	3.91506	9.03801e-05	0.00093439	bASV292	Bacteria	Acidobacteriota	Vicinamibacteria	Vicinamibacterales	uncultured	uncultured	Unidentified	0.9991941	CK
56.9468	-0.144245	0.053061	-2.71847	0.00655847	0.0497399	bASV260	Bacteria	Actinobacteriota	Thermoleophilia	Gaiellales	uncultured	uncultured	Unidentified	0.9930417	LN
144.983	-0.141101	0.0439892	-3.20763	0.00133831	0.0157168	bASV73	Bacteria	Firmicutes	Clostridia	Clostridiales	Clostridiaceae	Clostridium_sensu_stricto_1	Unidentified	0.9999423	LN
178.891	-0.134267	0.0420416	-3.19367	0.00140478	0.0160519	bASV43	Bacteria	Actinobacteriota	Thermoleophilia	Gaiellales	Gaiellaceae	Gaiella	Unidentified	0.9863302	LN
138.953	-0.117626	0.0423379	-2.77827	0.00546492	0.0433651	bASV72	Bacteria	Firmicutes	Clostridia	Clostridiales	Clostridiaceae	Clostridium_sensu_stricto_1	Clostridium_vincentii	0.9892718	LN
305.697	-0.117445	0.0357805	-3.28238	0.00102933	0.0131759	bASV18	Bacteria	Actinobacteriota	Thermoleophilia	Gaiellales	Gaiellaceae	Gaiella	uncultured_actinobacterium	0.8941554	LN
103.704	-0.115116	0.04166	-2.76321	0.00572357	0.0450009	bASV139	Bacteria	Proteobacteria	Alphaproteobacteria	Sphingomonadales	Sphingomonadaceae	Sphingomonas	Unidentified	0.9996322	LN
77.4754	0.240634	0.0562276	4.27965	1.87187e-05	0.000241074	bASV252	Bacteria	Chloroflexi	KD4-96	KD4-96	KD4-96	KD4-96	Unidentified	1.0000000	CK
150.205	-0.113129	0.0414698	-2.72799	0.00637225	0.0487591	bASV67	Bacteria	Acidobacteriota	Acidobacteriae	Bryobacterales	Bryobacteraceae	Bryobacter	Unidentified	0.9995112	LN
36.1831	0.242829	0.0669779	3.62551	0.000288392	0.00240327	bASV624	Bacteria	Gemmatimonadota	Gemmatimonadetes	Gemmatimonadales	Gemmatimonadaceae	uncultured	uncultured_Gemmatimonadaceae	0.9141326	CK
222.467	-0.111203	0.0370902	-2.99817	0.00271604	0.0258628	bASV28	Bacteria	Myxococcota	bacteriap25	bacteriap25	bacteriap25	bacteriap25	Unidentified	0.8987431	LN
254.295	-0.0969983	0.0266206	-3.64373	0.00026872	0.00434515	bASV29	Bacteria	Actinobacteriota	Actinobacteria	Frankiales	Geodermatophilaceae	Blastococcus	Unidentified	0.9985356	LN
862.292	0.0833937	0.0304605	2.73777	0.00618574	0.0481925	bASV6	Bacteria	Proteobacteria	Alphaproteobacteria	Rhizobiales	Xanthobacteraceae	Bradyrhizobium	Unidentified	0.8019381	LN
335.373	0.0846018	0.0274042	3.08718	0.00202063	0.020475	bASV19	Bacteria	Proteobacteria	Gammaproteobacteria	Steroidobacterales	Steroidobacteraceae	uncultured	Unidentified	0.9999960	LN
367.28	0.104378	0.033143	3.14931	0.00163657	0.0177537	bASV15	Bacteria	Proteobacteria	Alphaproteobacteria	Rhizobiales	Xanthobacteraceae	uncultured	Unidentified	0.7502583	LN
115.589	0.246553	0.0565757	4.35793	1.31297e-05	0.000177146	bASV187	Bacteria	Bacteroidota	Bacteroidia	Chitinophagales	Chitinophagaceae	uncultured	Unidentified	0.9987538	CK
32.2287	0.248152	0.0767306	3.23407	0.00122039	0.00850269	bASV723	Bacteria	Acidobacteriota	Acidobacteriae	Solibacterales	Solibacteraceae	Candidatus_Solibacter	Unidentified	0.9999902	CK
107.565	0.250712	0.0556763	4.50304	6.69898e-06	0.000101681	bASV157	Bacteria	Gemmatimonadota	Gemmatimonadetes	Gemmatimonadales	Gemmatimonadaceae	uncultured	Unidentified	0.9999986	CK
69.1883	0.251127	0.0844652	2.97314	0.00294769	0.0172796	bASV391	Bacteria	Chloroflexi	Chloroflexia	Chloroflexales	Roseiflexaceae	uncultured	Unidentified	1.0000000	CK
72.8826	0.255957	0.0691627	3.7008	0.000214922	0.00184529	bASV364	Bacteria	Acidobacteriota	Blastocatellia	Blastocatellales	Blastocatellaceae	Unidentified	Unidentified	0.9999957	CK
106.758	0.256064	0.0655574	3.90595	9.38568e-05	0.00093439	bASV197	Bacteria	Bacteroidota	Bacteroidia	Chitinophagales	Chitinophagaceae	Flavitalea	Unidentified	0.9999521	CK
56.2878	0.257221	0.0803699	3.20046	0.00137208	0.00925608	bASV603	Bacteria	Bacteroidota	Bacteroidia	Chitinophagales	Chitinophagaceae	Flavisolibacter	Unidentified	0.9372460	CK
209.358	0.115549	0.0397917	2.90384	0.00368618	0.0329068	bASV42	Bacteria	Acidobacteriota	Subgroup_11	Subgroup_11	Subgroup_11	Subgroup_11	uncultured_bacterium	0.9999998	LN
166.395	0.257615	0.0914633	2.81659	0.00485357	0.0250032	bASV93	Bacteria	Verrucomicrobiota	Verrucomicrobiae	Chthoniobacterales	Chthoniobacteraceae	Candidatus_Udaeobacter	Unidentified	0.9999993	CK
57.5463	0.269081	0.0666964	4.03441	5.47386e-05	0.000620371	bASV382	Bacteria	Chloroflexi	KD4-96	KD4-96	KD4-96	KD4-96	uncultured_Chloroflexi	0.8106454	CK
54.2065	0.270096	0.0617955	4.37079	1.23795e-05	0.000169719	bASV478	Bacteria	Actinobacteriota	Actinobacteria	Micrococcales	Cellulomonadaceae	Cellulomonas	Unidentified	0.9973058	CK
83.7379	0.120022	0.0439551	2.73056	0.00632277	0.0487591	bASV216	Bacteria	Proteobacteria	Alphaproteobacteria	Rhizobiales	Methyloligellaceae	uncultured	Unidentified	0.9989962	LN
77.5985	-0.153976	0.0434611	-3.54285	0.000395824	0.0285696	bASV211	Bacteria	Actinobacteriota	Actinobacteria	Frankiales	Geodermatophilaceae	Blastococcus	Unidentified	0.7377095	LP
41.6986	0.270722	0.0929751	2.91177	0.00359389	0.0200974	bASV592	Bacteria	Acidobacteriota	Blastocatellia	Pyrinomonadales	Pyrinomonadaceae	RB41	Unidentified	0.9958557	CK
38.2685	0.271013	0.0796862	3.40101	0.000671383	0.00509531	bASV716	Bacteria	Bacteroidota	Bacteroidia	Chitinophagales	Chitinophagaceae	Flavisolibacter	uncultured_bacterium	0.7417909	CK
45.9046	0.271715	0.100696	2.69837	0.00696798	0.0332741	bASV550	Bacteria	Chloroflexi	Chloroflexia	Chloroflexales	Roseiflexaceae	uncultured	Unidentified	0.9999999	CK
73.3942	0.124754	0.0430328	2.89905	0.00374298	0.0330526	bASV314	Bacteria	Actinobacteriota	Thermoleophilia	Gaiellales	uncultured	uncultured	Unidentified	0.9999351	LN
62.9265	0.272847	0.0929415	2.93568	0.00332815	0.0188557	bASV386	Bacteria	Proteobacteria	Gammaproteobacteria	Gammaproteobacteria_Incertae_Sedis	Unknown_Family	Acidibacter	Unidentified	0.9966444	CK
62.7993	0.134094	0.0409286	3.27628	0.00105185	0.0131759	bASV282	Bacteria	Actinobacteriota	Acidimicrobiia	uncultured	uncultured	uncultured	Unidentified	0.7024152	LN
144.707	-0.150919	0.0446984	-3.3764	0.00073442	0.0364186	bASV64	Bacteria	Actinobacteriota	Actinobacteria	Micrococcales	Intrasporangiaceae	Unidentified	Unidentified	0.9971403	LP
46.6504	0.27549	0.0751143	3.66761	0.000244828	0.00206044	bASV541	Bacteria	Verrucomicrobiota	Verrucomicrobiae	Chthoniobacterales	Chthoniobacteraceae	Candidatus_Udaeobacter	Unidentified	0.9999976	CK
63.31	0.278594	0.0568202	4.90309	9.43412e-07	1.8225e-05	bASV403	Bacteria	Actinobacteriota	Acidimicrobiia	Microtrichales	Ilumatobacteraceae	Ilumatobacter	Unidentified	0.9958269	CK
158.307	0.141267	0.0453511	3.11496	0.00183972	0.0193976	bASV61	Bacteria	Proteobacteria	Alphaproteobacteria	Rhizobiales	Methyloligellaceae	Methyloligellaceae	uncultured_bacterium	0.9452495	LN
131.747	-0.141307	0.0426642	-3.31207	0.000926087	0.0433718	bASV91	Bacteria	Proteobacteria	Gammaproteobacteria	CCD24	CCD24	CCD24	Unidentified	1.0000000	LP
61.9534	0.280245	0.0652293	4.2963	1.7367e-05	0.000230656	bASV354	Bacteria	Gemmatimonadota	Gemmatimonadetes	Gemmatimonadales	Gemmatimonadaceae	uncultured	Unidentified	0.9897943	CK
119.466	0.141642	0.0397562	3.56277	0.00036696	0.00551728	bASV129	Bacteria	Actinobacteriota	Acidimicrobiia	IMCC26256	IMCC26256	IMCC26256	uncultured_Ferrimicrobium	0.9804588	LN
65.7293	0.142749	0.0494546	2.88647	0.00389594	0.0335828	bASV281	Bacteria	Proteobacteria	Gammaproteobacteria	Burkholderiales	Comamonadaceae	Unidentified	Unidentified	0.9999950	LN
86.5773	0.15434	0.0507107	3.04355	0.00233805	0.0225135	bASV177	Bacteria	Acidobacteriota	Holophagae	Subgroup_7	Subgroup_7	Subgroup_7	uncultured_bacterium	0.8346691	LN
105.732	0.283359	0.0614527	4.61101	4.00724e-06	6.4267e-05	bASV190	Bacteria	Acidobacteriota	Blastocatellia	Blastocatellales	Blastocatellaceae	uncultured	Unidentified	0.9149112	CK
39.7577	0.287575	0.094691	3.03698	0.00238962	0.0144055	bASV559	Bacteria	Firmicutes	Bacilli	Bacillales	Planococcaceae	Unidentified	Unidentified	0.9325248	CK
25.8489	0.289164	0.0978489	2.95521	0.00312461	0.0180675	bASV820	Bacteria	Chloroflexi	Chloroflexia	Chloroflexales	Roseiflexaceae	uncultured	uncultured_Chloroflexaceae	0.9790375	CK
201.969	0.158237	0.034503	4.58617	4.5144e-06	0.000154754	bASV60	Bacteria	Proteobacteria	Alphaproteobacteria	Rhizobiales	Xanthobacteraceae	Unidentified	Unidentified	0.9997959	LN
88.8254	0.161185	0.0485008	3.32336	0.000889411	0.0117265	bASV185	Bacteria	Actinobacteriota	Actinobacteria	Propionibacteriales	Nocardioidaceae	Aeromicrobium	uncultured_bacterium	0.9372836	LN
39.6911	0.300351	0.0709234	4.23487	2.28687e-05	0.000281716	bASV561	Bacteria	Actinobacteriota	Acidimicrobiia	Microtrichales	Iamiaceae	Iamia	Unidentified	0.7606632	CK
94.0815	0.302233	0.0765783	3.94672	7.92306e-05	0.000841825	bASV295	Bacteria	Firmicutes	Bacilli	Alicyclobacillales	Alicyclobacillaceae	Tumebacillus	Tumebacillus_permanentifrigoris	0.9220224	CK
30.7617	0.309957	0.104114	2.97709	0.00290995	0.0171768	bASV800	Bacteria	Chloroflexi	Anaerolineae	RBG-13-54-9	RBG-13-54-9	RBG-13-54-9	uncultured_sludge	0.9984980	CK
20.7243	0.310085	0.087244	3.55423	0.000379086	0.00303984	bASV839	Bacteria	Acidobacteriota	Acidobacteriae	PAUC26f	PAUC26f	PAUC26f	uncultured_bacterium	0.9786977	CK
41.672	0.310625	0.0802996	3.86833	0.000109584	0.00104659	bASV705	Bacteria	Armatimonadota	uncultured	uncultured	uncultured	uncultured	uncultured_soil	0.8976939	CK
118.204	0.140878	0.0400672	3.51604	0.00043803	0.0285696	bASV176	Bacteria	Actinobacteriota	Thermoleophilia	Gaiellales	Gaiellaceae	Gaiella	metagenome	0.9853568	LP
69.9968	0.311529	0.0765159	4.07143	4.67255e-05	0.000544064	bASV343	Bacteria	Planctomycetota	Planctomycetes	Isosphaerales	Isosphaeraceae	Singulisphaera	Unidentified	0.9999999	CK
53.287	0.317398	0.0759328	4.17998	2.91537e-05	0.000349023	bASV397	Bacteria	Proteobacteria	Gammaproteobacteria	Burkholderiales	Nitrosomonadaceae	mle1-7	Unidentified	0.9991696	CK
43.3582	0.16338	0.0529475	3.08569	0.00203078	0.020475	bASV531	Bacteria	Proteobacteria	Alphaproteobacteria	Rhizobiales	Hyphomicrobiaceae	Pedomicrobium	Unidentified	0.9990598	LN
38.6153	0.173466	0.0588451	2.94783	0.00320009	0.0298096	bASV515	Bacteria	Acidobacteriota	Blastocatellia	Pyrinomonadales	Pyrinomonadaceae	RB41	uncultured_Acidobacteriaceae	0.7801744	LN
57.614	0.319511	0.0683322	4.67585	2.92737e-06	4.97654e-05	bASV517	Bacteria	Bacteroidota	Bacteroidia	Cytophagales	Microscillaceae	uncultured	Unidentified	0.9458583	CK
53.7297	0.329831	0.0751106	4.39127	1.12692e-05	0.000159647	bASV485	Bacteria	Chloroflexi	Chloroflexia	Chloroflexales	Roseiflexaceae	uncultured	Unidentified	1.0000000	CK
42.6219	0.344459	0.0910991	3.78115	0.000156107	0.00144229	bASV568	Bacteria	Proteobacteria	Gammaproteobacteria	Burkholderiales	Nitrosomonadaceae	mle1-7	uncultured_bacterium	0.9174816	CK
58.7486	0.352141	0.0863725	4.07701	4.56194e-05	0.000538563	bASV413	Bacteria	Planctomycetota	Planctomycetes	Pirellulales	Pirellulaceae	uncultured	uncultured_Planctomycetaceae	0.8695726	CK
29.9372	0.36177	0.0769335	4.70237	2.57155e-06	4.55379e-05	bASV792	Bacteria	Proteobacteria	Alphaproteobacteria	Rhodobacterales	Rhodobacteraceae	Amaricoccus	uncultured_bacterium	0.8599948	CK
155.328	0.364895	0.0693995	5.2579	1.4571e-07	3.2593e-06	bASV107	Bacteria	Bacteroidota	Bacteroidia	Chitinophagales	Chitinophagaceae	uncultured	Unidentified	0.7784866	CK
184.765	0.181707	0.0624728	2.90857	0.00363083	0.0327539	bASV66	Bacteria	Actinobacteriota	MB-A2-108	MB-A2-108	MB-A2-108	MB-A2-108	uncultured_bacterium	0.9154968	LN
55.7924	0.368696	0.0592335	6.22445	4.8326e-10	1.95605e-08	bASV423	Bacteria	Acidobacteriota	Blastocatellia	11-24	11-24	11-24	uncultured_Acidobacteria	0.9384676	CK
198.484	0.184794	0.0373536	4.94714	7.53105e-07	4.36882e-05	bASV52	Bacteria	Proteobacteria	Alphaproteobacteria	Azospirillales	uncultured	uncultured	uncultured_bacterium	0.9737621	LN
28.5299	0.373	0.0808925	4.61107	4.00611e-06	6.4267e-05	bASV794	Bacteria	Verrucomicrobiota	Verrucomicrobiae	Pedosphaerales	Pedosphaeraceae	Pedosphaeraceae	Unidentified	0.8287389	CK
354.449	0.395964	0.0704974	5.61671	1.94629e-08	5.16983e-07	bASV23	Bacteria	Verrucomicrobiota	Verrucomicrobiae	Chthoniobacterales	Xiphinematobacteraceae	Candidatus_Xiphinematobacter	uncultured_bacterium	0.9740724	CK
53.1534	0.188778	0.0651861	2.89599	0.00377964	0.0330526	bASV354	Bacteria	Gemmatimonadota	Gemmatimonadetes	Gemmatimonadales	Gemmatimonadaceae	uncultured	Unidentified	0.9897943	LN
79.6694	0.141116	0.041399	3.40868	0.00065279	0.0343939	bASV239	Bacteria	Actinobacteriota	Actinobacteria	Propionibacteriales	Nocardioidaceae	Nocardioides	Marmoricola_sp.	0.7867461	LP
145.98	0.412477	0.0823338	5.00981	5.44834e-07	1.10264e-05	bASV130	Bacteria	Verrucomicrobiota	Verrucomicrobiae	Chthoniobacterales	Xiphinematobacteraceae	Candidatus_Xiphinematobacter	uncultured_bacterium	0.9082509	CK
40.7978	0.199518	0.0598186	3.33539	0.0008518	0.0114061	bASV472	Bacteria	Proteobacteria	Alphaproteobacteria	uncultured	uncultured	uncultured	uncultured_Stella	0.9908900	LN
44.968	0.422801	0.0699464	6.04464	1.49742e-09	5.30334e-08	bASV597	Bacteria	Chloroflexi	Chloroflexia	Chloroflexales	Roseiflexaceae	uncultured	Unidentified	1.0000000	CK
152.095	0.427067	0.0934924	4.56793	4.92561e-06	7.75328e-05	bASV128	Bacteria	Verrucomicrobiota	Verrucomicrobiae	Chthoniobacterales	Xiphinematobacteraceae	Candidatus_Xiphinematobacter	uncultured_bacterium	0.8430752	CK
95.1332	0.442164	0.0880989	5.01895	5.19549e-07	1.07711e-05	bASV208	Bacteria	Verrucomicrobiota	Verrucomicrobiae	Chthoniobacterales	Xiphinematobacteraceae	Candidatus_Xiphinematobacter	Unidentified	0.9999899	CK
29.5621	0.455602	0.165854	2.747	0.00601428	0.0297217	bASV936	Bacteria	Cyanobacteria	Cyanobacteriia	Cyanobacteriales	Nostocaceae	Nostoc_PCC-7524	Nostoc_sp.	0.8708820	CK
37.5933	0.458309	0.0806857	5.68018	1.34555e-08	3.6894e-07	bASV744	Bacteria	Chloroflexi	Chloroflexia	Chloroflexales	Roseiflexaceae	uncultured	Unidentified	1.0000000	CK
106.728	0.467301	0.0906029	5.15768	2.50024e-07	5.31301e-06	bASV186	Bacteria	Verrucomicrobiota	Verrucomicrobiae	Chthoniobacterales	Xiphinematobacteraceae	Candidatus_Xiphinematobacter	uncultured_bacterium	0.8201415	CK
64.0407	0.202006	0.0534028	3.78269	0.000155143	0.00282888	bASV318	Bacteria	Proteobacteria	Gammaproteobacteria	Burkholderiales	SC-I-84	SC-I-84	Unidentified	1.0000000	LN
27.7353	0.204366	0.0651872	3.13507	0.00171815	0.0184057	bASV771	Bacteria	Gemmatimonadota	Gemmatimonadetes	Gemmatimonadales	Gemmatimonadaceae	uncultured	Unidentified	0.9681577	LN
101.098	0.467361	0.0670634	6.96894	3.19334e-12	2.26195e-10	bASV228	Bacteria	Gemmatimonadota	Gemmatimonadetes	Gemmatimonadales	Gemmatimonadaceae	Gemmatimonas	Unidentified	1.0000000	CK
47.566	0.204449	0.0623906	3.27693	0.00104943	0.0131759	bASV460	Bacteria	Proteobacteria	Gammaproteobacteria	Burkholderiales	SC-I-84	SC-I-84	Unidentified	0.9999990	LN
28.8139	0.20628	0.0653122	3.15836	0.00158657	0.017432	bASV864	Bacteria	Gemmatimonadota	Gemmatimonadetes	Gemmatimonadales	Gemmatimonadaceae	uncultured	uncultured_Alphaproteobacteria	0.9850100	LN
41.7573	0.467554	0.087549	5.34049	9.26973e-08	2.18869e-06	bASV708	Bacteria	Chloroflexi	Chloroflexia	Chloroflexales	Roseiflexaceae	uncultured	uncultured_bacterium	0.9990498	CK
28.4832	0.213155	0.0760378	2.80327	0.0050587	0.0420903	bASV774	Bacteria	Methylomirabilota	Methylomirabilia	Rokubacteriales	WX65	WX65	uncultured_bacterium	0.9999999	LN
43.1126	0.215271	0.0508263	4.23542	2.28126e-05	0.000575011	bASV564	Bacteria	Proteobacteria	Alphaproteobacteria	Rhizobiales	Xanthobacteraceae	Unidentified	Unidentified	0.9992405	LN
30.777	0.470448	0.162255	2.89944	0.00373833	0.0205005	bASV675	Bacteria	Acidobacteriota	Blastocatellia	11-24	11-24	11-24	uncultured_Acidobacteria	0.9206950	CK
121.649	0.480148	0.0753003	6.37644	1.81249e-10	7.70308e-09	bASV171	Bacteria	Acidobacteriota	Blastocatellia	Pyrinomonadales	Pyrinomonadaceae	RB41	Unidentified	0.9995053	CK
86.2175	0.178018	0.0490204	3.6315	0.000281774	0.0285696	bASV217	Bacteria	Actinobacteriota	Actinobacteria	Propionibacteriales	Nocardioidaceae	Nocardioides	Unidentified	0.9974970	LP
50.1672	0.218862	0.0714054	3.06507	0.00217621	0.0214369	bASV366	Bacteria	Chloroflexi	Gitt-GS-136	Gitt-GS-136	Gitt-GS-136	Gitt-GS-136	Unidentified	1.0000000	LN
17.22	0.981031	0.280714	3.49477	0.000474466	0.0285696	bASV1297	Bacteria	Actinobacteriota	Actinobacteria	Corynebacteriales	Mycobacteriaceae	Mycobacterium	Unidentified	0.9999956	LP
45.4091	0.224601	0.0535097	4.19739	2.70012e-05	0.000661143	bASV428	Bacteria	Proteobacteria	Alphaproteobacteria	Rhizobiales	Rhizobiales_Incertae_Sedis	uncultured	uncultured_Alphaproteobacteria	0.7415346	LN
39.5315	0.497203	0.105652	4.70604	2.52574e-06	4.55379e-05	bASV637	Bacteria	Cyanobacteria	Cyanobacteriia	Cyanobacteriales	Nostocaceae	Desmonostoc_PCC-7422	Unidentified	0.9977918	CK
69.1496	0.237173	0.0849732	2.79116	0.00525201	0.0428664	bASV219	Bacteria	Chloroflexi	Chloroflexia	Thermomicrobiales	JG30-KF-CM45	JG30-KF-CM45	uncultured_Chloroflexi	0.7433490	LN
63.4608	0.241319	0.0518402	4.65506	3.23884e-06	0.000126074	bASV322	Bacteria	Proteobacteria	Alphaproteobacteria	Rhizobiales	Hyphomicrobiaceae	Pedomicrobium	Unidentified	0.9974798	LN
32.5859	0.256835	0.0686163	3.74306	0.000181795	0.00317955	bASV596	Bacteria	Proteobacteria	Gammaproteobacteria	Nitrosococcales	Nitrosococcaceae	wb1-P19	uncultured_bacterium	0.9995055	LN
76.376	0.259338	0.0548995	4.72387	2.31402e-06	9.44341e-05	bASV340	Bacteria	Gemmatimonadota	AKAU4049	AKAU4049	AKAU4049	AKAU4049	uncultured_bacterium	1.0000000	LN
125.58	0.499138	0.10728	4.65267	3.27666e-06	5.46109e-05	bASV182	Bacteria	Cyanobacteria	Cyanobacteriia	Cyanobacteriales	Nostocaceae	Nostoc_PCC-73102	Unidentified	0.9989564	CK
31.6349	0.264704	0.0939873	2.81638	0.00485684	0.040848	bASV707	Bacteria	Acidobacteriota	Subgroup_22	Subgroup_22	Subgroup_22	Subgroup_22	uncultured_Acidobacteria	0.8850328	LN
49.8768	0.277647	0.0566868	4.89792	9.68584e-07	4.36882e-05	bASV430	Bacteria	Chloroflexi	TK10	TK10	TK10	TK10	uncultured_bacterium	0.9832409	LN
62.443	0.509383	0.0798465	6.37953	1.77629e-10	7.70308e-09	bASV490	Bacteria	Chloroflexi	Chloroflexia	Chloroflexales	Roseiflexaceae	uncultured	Unidentified	1.0000000	CK
23.2088	0.520936	0.199088	2.61661	0.00888089	0.0403677	bASV702	Bacteria	Acidobacteriota	Blastocatellia	Pyrinomonadales	Pyrinomonadaceae	RB41	Unidentified	0.9224312	CK
28.7839	0.522633	0.111095	4.70438	2.5464e-06	4.55379e-05	bASV870	Bacteria	Planctomycetota	Planctomycetes	Gemmatales	Gemmataceae	uncultured	uncultured_bacterium	0.9863191	CK
101.779	0.541686	0.090061	6.01466	1.80266e-09	6.12904e-08	bASV287	Bacteria	Chloroflexi	Chloroflexia	Chloroflexales	Roseiflexaceae	uncultured	Unidentified	1.0000000	CK
39.1638	0.547615	0.0779142	7.02843	2.08868e-12	1.61398e-10	bASV727	Bacteria	Chloroflexi	Chloroflexia	Chloroflexales	Roseiflexaceae	uncultured	uncultured_bacterium	0.9992932	CK
34.2004	0.282624	0.0730759	3.86754	0.000109938	0.00214344	bASV693	Bacteria	Latescibacterota	Latescibacterota	Latescibacterota	Latescibacterota	Latescibacterota	Unidentified	0.9999916	LN
31.5472	0.287646	0.0586323	4.90593	9.29879e-07	4.36882e-05	bASV736	Bacteria	Proteobacteria	Alphaproteobacteria	uncultured	uncultured	uncultured	uncultured_bacterium	0.9266252	LN
28.502	0.292639	0.0675015	4.3353	1.45565e-05	0.000406391	bASV611	Bacteria	Gemmatimonadota	Gemmatimonadetes	Gemmatimonadales	Gemmatimonadaceae	Unidentified	Unidentified	1.0000000	LN
131.727	0.551125	0.0982398	5.61	2.02331e-08	5.21155e-07	bASV155	Bacteria	Cyanobacteria	Cyanobacteriia	Cyanobacteriales	Nostocaceae	Nostoc_PCC-73102	Unidentified	0.8946585	CK
58.1303	0.560934	0.0817462	6.86189	6.79562e-12	4.12591e-10	bASV434	Bacteria	Chloroflexi	Anaerolineae	SBR1031	SBR1031	SBR1031	uncultured_Gemmatimonadetes	0.9999908	CK
26.5805	0.563657	0.132887	4.24162	2.21908e-05	0.000281036	bASV910	Bacteria	Planctomycetota	Planctomycetes	Pirellulales	Pirellulaceae	uncultured	Unidentified	0.9996424	CK
22.7606	1.00964	0.280601	3.59814	0.000320507	0.0285696	bASV861	Bacteria	Actinobacteriota	Actinobacteria	Micrococcales	Intrasporangiaceae	Unidentified	Unidentified	0.9857261	LP
51.346	0.566678	0.107716	5.26087	1.43373e-07	3.2593e-06	bASV673	Bacteria	Chloroflexi	Chloroflexia	Chloroflexales	Roseiflexaceae	uncultured	uncultured_bacterium	0.9524251	CK
102.475	0.293093	0.0719835	4.07167	4.66777e-05	0.0010527	bASV194	Bacteria	Gemmatimonadota	AKAU4049	AKAU4049	AKAU4049	AKAU4049	uncultured_bacterium	0.9075290	LN
38.3013	0.294132	0.0598929	4.91097	9.06278e-07	4.36882e-05	bASV560	Bacteria	Proteobacteria	Alphaproteobacteria	Rhizobiales	Xanthobacteraceae	Unidentified	Unidentified	0.9995300	LN
44.0871	0.313226	0.059259	5.28571	1.25216e-07	1.34138e-05	bASV608	Bacteria	Proteobacteria	Gammaproteobacteria	Burkholderiales	Nitrosomonadaceae	MND1	uncultured_Burkholderiales	0.7202428	LN
35.2003	0.581566	0.228251	2.54792	0.0108366	0.0472364	bASV660	Bacteria	Proteobacteria	Gammaproteobacteria	Burkholderiales	Nitrosomonadaceae	Ellin6067	Unidentified	0.9999999	CK
120.174	0.602554	0.100376	6.00296	1.93748e-09	6.33406e-08	bASV173	Bacteria	Chloroflexi	Chloroflexia	Chloroflexales	Roseiflexaceae	uncultured	uncultured_bacterium	0.9999934	CK
42.8317	0.611606	0.196939	3.10556	0.00189917	0.0118698	bASV522	Bacteria	Cyanobacteria	Cyanobacteriia	Cyanobacteriales	Nostocaceae	Tolypothrix	Unidentified	0.8885959	CK
40.3469	0.639353	0.19419	3.29241	0.000993313	0.00724559	bASV704	Bacteria	Myxococcota	bacteriap25	bacteriap25	bacteriap25	bacteriap25	Unidentified	0.9999986	CK
14.7303	1.10405	0.293023	3.7678	0.00016469	0.0285696	bASV1045	Bacteria	Actinobacteriota	Thermoleophilia	Gaiellales	uncultured	uncultured	uncultured_actinobacterium	0.8582237	LP
24.3069	0.32709	0.0820183	3.98801	6.66309e-05	0.00142757	bASV839	Bacteria	Acidobacteriota	Acidobacteriae	PAUC26f	PAUC26f	PAUC26f	uncultured_bacterium	0.9786977	LN
46.1102	0.345553	0.0933521	3.70161	0.000214238	0.00360004	bASV355	Bacteria	Proteobacteria	Alphaproteobacteria	Rhizobiales	Xanthobacteraceae	Unidentified	Unidentified	0.9998876	LN
24.7516	0.347955	0.0903707	3.85031	0.000117969	0.00224665	bASV925	Bacteria	Gemmatimonadota	Gemmatimonadetes	Gemmatimonadales	Gemmatimonadaceae	uncultured	uncultured_Gemmatimonas	0.7615019	LN
31.8529	0.640732	0.105493	6.07368	1.2501e-09	4.61994e-08	bASV855	Bacteria	Chloroflexi	Anaerolineae	SBR1031	SBR1031	SBR1031	uncultured_Gemmatimonadetes	0.9999770	CK
35.0892	0.349292	0.12567	2.77944	0.00544526	0.0433651	bASV702	Bacteria	Acidobacteriota	Blastocatellia	Pyrinomonadales	Pyrinomonadaceae	RB41	Unidentified	0.9224312	LN
92.6415	0.642478	0.112963	5.68753	1.28892e-08	3.65193e-07	bASV272	Bacteria	Cyanobacteria	Cyanobacteriia	Cyanobacteriales	Nostocaceae	Nostoc_PCC-7524	Trichormus_variabilis	0.7022021	CK
38.0056	0.371897	0.0608445	6.11225	9.82354e-10	4.20939e-07	bASV487	Bacteria	Proteobacteria	Gammaproteobacteria	Burkholderiales	A21b	A21b	Unidentified	1.0000000	LN
23.4268	0.417793	0.0972081	4.29792	1.72407e-05	0.000447735	bASV917	Bacteria	Proteobacteria	Gammaproteobacteria	PLTA13	PLTA13	PLTA13	uncultured_bacterium	0.9065263	LN
45.3665	0.476736	0.170272	2.79985	0.00511259	0.0421297	bASV445	Bacteria	Proteobacteria	Alphaproteobacteria	Tistrellales	Geminicoccaceae	Candidatus_Alysiosphaera	metagenome	0.7818237	LN
57.7185	0.511933	0.16684	3.0684	0.00215207	0.0214369	bASV316	Bacteria	Proteobacteria	Gammaproteobacteria	Burkholderiales	Sutterellaceae	uncultured	Unidentified	0.9999994	LN
30.0234	0.600767	0.204703	2.93483	0.00333733	0.0307536	bASV675	Bacteria	Acidobacteriota	Blastocatellia	11-24	11-24	11-24	uncultured_Acidobacteria	0.9206950	LN
31.5656	0.655036	0.119464	5.48311	4.17911e-08	1.04478e-06	bASV966	Bacteria	Chloroflexi	Chloroflexia	Chloroflexales	Roseiflexaceae	uncultured	uncultured_Chloroflexi	0.9996475	CK
17.6722	0.969847	0.273523	3.54576	0.00039149	0.0057846	bASV1371	Bacteria	Proteobacteria	Gammaproteobacteria	Gammaproteobacteria_Incertae_Sedis	Unknown_Family	Acidibacter	Unidentified	0.9996667	LN
5.77471	0.973843	0.299062	3.25632	0.00112866	0.0136234	bASV1871	Bacteria	Myxococcota	Polyangia	Polyangiales	Polyangiaceae	Pajaroellobacter	metagenome	0.8502882	LN
80.2536	0.678006	0.0795425	8.52383	1.54367e-17	2.18687e-15	bASV320	Bacteria	Gemmatimonadota	Gemmatimonadetes	Gemmatimonadales	Gemmatimonadaceae	Gemmatimonas	Unidentified	1.0000000	CK
5.56729	0.988771	0.293668	3.36697	0.000759983	0.0103382	bASV1377	Bacteria	Actinobacteriota	Actinobacteria	Micromonosporales	Micromonosporaceae	Luedemannella	metagenome	0.8616397	LN
61.902	0.784049	0.105911	7.40294	1.33204e-13	1.25804e-11	bASV435	Bacteria	Chloroflexi	Chloroflexia	Chloroflexales	Roseiflexaceae	uncultured	uncultured_bacterium	0.9999876	CK
42.6285	0.850949	0.113737	7.48171	7.33643e-14	7.79496e-12	bASV813	Bacteria	Chloroflexi	Chloroflexia	Thermomicrobiales	AKYG1722	AKYG1722	Unidentified	1.0000000	CK
74.6437	0.85428	0.0983678	8.68455	3.80233e-18	6.46396e-16	bASV431	Bacteria	Chloroflexi	Chloroflexia	Chloroflexales	Roseiflexaceae	uncultured	uncultured_bacterium	0.9856662	CK
16.322	0.892711	0.309599	2.88344	0.0039336	0.0211749	bASV1435	Bacteria	Chloroflexi	Chloroflexia	Chloroflexales	Roseiflexaceae	uncultured	uncultured_soil	0.7403015	CK
13.8529	1.00399	0.267757	3.74963	0.000177097	0.00316191	bASV1104	Bacteria	Proteobacteria	Alphaproteobacteria	Tistrellales	Geminicoccaceae	uncultured	Unidentified	0.9999991	LN
15.0848	1.17031	0.330978	3.53591	0.000406377	0.0285696	bASV1230	Bacteria	Acidobacteriota	Vicinamibacteria	Vicinamibacterales	uncultured	uncultured	Unidentified	0.9999946	LP
9.84553	1.12003	0.374651	2.98953	0.00279408	0.0166082	bASV2157	Bacteria	Verrucomicrobiota	Verrucomicrobiae	Chthoniobacterales	Xiphinematobacteraceae	Candidatus_Xiphinematobacter	uncultured_bacterium	0.9325617	CK
21.1464	1.19687	0.397871	3.00819	0.00262808	0.0157314	bASV50	Bacteria	Chloroflexi	KD4-96	KD4-96	KD4-96	KD4-96	Unidentified	1.0000000	CK
69.8465	1.35636	0.369908	3.66676	0.000245647	0.0285696	bASV58	Bacteria	Chloroflexi	KD4-96	KD4-96	KD4-96	KD4-96	Unidentified	1.0000000	LP
3.63322	1.28955	0.326113	3.9543	7.67586e-05	0.000825884	bASV1809	Bacteria	Acidobacteriota	Vicinamibacteria	Vicinamibacterales	uncultured	uncultured	uncultured_bacterium	0.9703174	CK
174.25	1.03486	0.332499	3.11235	0.00185602	0.0193976	bASV50	Bacteria	Chloroflexi	KD4-96	KD4-96	KD4-96	KD4-96	Unidentified	1.0000000	LN
10.474	1.06311	0.32513	3.26981	0.00107621	0.0131759	bASV921	Bacteria	Gemmatimonadota	Gemmatimonadetes	Gemmatimonadales	Gemmatimonadaceae	uncultured	Unidentified	1.0000000	LN
12.939	1.06767	0.33327	3.20362	0.00135711	0.0157168	bASV1605	Bacteria	Acidobacteriota	Vicinamibacteria	Vicinamibacterales	uncultured	uncultured	Unidentified	0.9999721	LN
8.61461	1.29453	0.425726	3.04076	0.00235983	0.0143275	bASV1826	Bacteria	Bdellovibrionota	Oligoflexia	0319-6G20	0319-6G20	0319-6G20	uncultured_Syntrophobacteraceae	0.7659395	CK
21.2921	1.58078	0.353125	4.47654	7.58607e-06	0.000113126	bASV1456	Bacteria	Bacteroidota	Bacteroidia	Chitinophagales	Chitinophagaceae	Flavisolibacter	Unidentified	0.9753723	CK
31.6826	1.60794	0.306729	5.24221	1.58663e-07	3.45804e-06	bASV1007	Bacteria	Chloroflexi	Chloroflexia	Chloroflexales	Roseiflexaceae	uncultured	uncultured_bacterium	0.9999915	CK
20.0958	1.68491	0.281938	5.97615	2.28476e-09	7.19278e-08	bASV1751	Bacteria	Cyanobacteria	Cyanobacteriia	Cyanobacteriales	Nostocaceae	Unidentified	Unidentified	0.9999972	CK
18.105	1.93164	0.338519	5.70617	1.15546e-08	3.38669e-07	bASV1550	Bacteria	Chloroflexi	Chloroflexia	Thermomicrobiales	JG30-KF-CM45	JG30-KF-CM45	uncultured_Chloroflexi	0.9342685	CK
136.903	2.19773	0.265321	8.2833	1.19811e-16	1.45485e-14	bASV393	Bacteria	Actinobacteriota	Rubrobacteria	Rubrobacterales	Rubrobacteriaceae	Rubrobacter	metagenome	0.9999929	CK

## Sheet: Table S5
Table S5 Differentally abundant fungal ASVs between hybrids and inbred lines under each soil condition. CK: control soil; LN: low nitrogen soil; LP: low phosphorus soil
baseMean	log2FoldChange	lfcSE	stat	pvalue	padj	ASVid	Kingdom	Phylum	Class	Order	Family	Genus	Species	Confidence	Treatment
8.63437	-2.99458	0.259519	-11.539	8.39263e-31	2.30797e-28	fASV183	Fungi	Ascomycota	Eurotiomycetes	Eurotiales	Aspergillaceae	Penicillium	Unidentified	0.9990002	CK
6.59376	-2.55648	0.248161	-10.3017	6.9229e-25	9.51899e-23	fASV307	Fungi	Ascomycota	Sordariomycetes	Hypocreales	Nectriaceae	Fusarium	Fusarium_cuneirostrum	0.9997408	CK
4.54671	-1.70467	0.2972	-5.73574	9.70853e-09	3.33731e-07	fASV84	Fungi	Ascomycota	Sordariomycetes	Xylariales	Microdochiaceae	Microdochium	unidentified	0.7617071	CK
33.014	-1.5811	0.273109	-5.78926	7.06954e-09	2.77732e-07	fASV530	Fungi	Ascomycota	Eurotiomycetes	Eurotiales	Aspergillaceae	Penicillium	Penicillium_bialowiezense	0.9971642	CK
18.5129	-1.5463	0.428694	-3.60701	0.000309749	0.00304218	fASV458	Fungi	Chytridiomycota	Rhizophydiomycetes	Rhizophydiales	Rhizophydiales_fam_Incertae_sedis	Operculomyces	Operculomyces_laminatus	0.9999973	CK
3.45605	-1.36096	0.275416	-4.94148	7.7531e-07	1.4214e-05	fASV622	Fungi	Zoopagomycota	Zoopagomycetes	Zoopagales	Piptocephalidaceae	Syncephalis	unidentified	0.9999556	CK
14.4067	-1.31917	0.382712	-3.44691	0.000567034	0.00472529	fASV368	Fungi	Ascomycota	Sordariomycetes	Unidentified	Unidentified	Unidentified	Unidentified	0.8888861	CK
25.3011	-1.16983	0.420503	-2.78199	0.00540273	0.0291323	fASV207	Fungi	Basidiomycota	Tremellomycetes	Cystofilobasidiales	Mrakiaceae	Tausonia	Tausonia_pullulans	0.9999999	CK
3.26098	-1.15806	0.216893	-5.33933	9.32909e-08	2.33227e-06	fASV1055	Fungi	Ascomycota	Eurotiomycetes	Eurotiales	Aspergillaceae	Penicillium	Unidentified	0.9999959	CK
12.0046	-1.09886	0.347365	-3.16342	0.00155927	0.0106724	fASV650	Fungi	Ascomycota	Leotiomycetes	Helotiales	Dermateaceae	Trichosporiella	Trichosporiella_cerebriformis	0.7134595	CK
16.6639	-1.09634	0.411476	-2.66441	0.00771243	0.0385622	fASV703	Fungi	Basidiomycota	Agaricomycetes	Geastrales	Geastraceae	Geastrum	Geastrum_floriforme	0.9999978	CK
29.6301	-1.03317	0.386765	-2.67131	0.00755556	0.0384774	fASV374	Fungi	Ascomycota	Leotiomycetes	Thelebolales	Pseudeurotiaceae	Pseudogymnoascus	Pseudogymnoascus_destructans	0.7326734	CK
19.3099	-0.9634	0.374499	-2.57251	0.0100965	0.0478713	fASV114	Fungi	Basidiomycota	Malasseziomycetes	Malasseziales	Malasseziaceae	Malassezia	Malassezia_restricta	0.9999767	CK
2.91426	-0.944979	0.260558	-3.62675	0.000287008	0.00292323	fASV927	Fungi	Zoopagomycota	Zoopagomycetes	Zoopagales	Piptocephalidaceae	Syncephalis	unidentified	0.9999989	CK
4.19269	-0.899933	0.312611	-2.87876	0.00399237	0.021958	fASV50	Fungi	Ascomycota	Sordariomycetes	Sordariales	Chaetomiaceae	Chaetomium	Chaetomium_elatum	0.8306366	CK
33.1934	-0.830066	0.239071	-3.47205	0.000516497	0.00443864	fASV365	Fungi	Basidiomycota	Agaricomycetes	Polyporales	Ganodermataceae	Ganoderma	Unidentified	0.8943054	CK
42.497	-0.806342	0.255372	-3.15752	0.00159116	0.0106724	fASV227	Fungi	Ascomycota	Sordariomycetes	Hypocreales	Hypocreaceae	Trichoderma	Unidentified	0.9977232	CK
2.72821	-0.730985	0.233147	-3.1353	0.00171681	0.0109796	fASV536	Fungi	Ascomycota	Dothideomycetes	Pleosporales	Unidentified	Unidentified	Unidentified	0.8801631	CK
225.095	-0.536164	0.184922	-2.8994	0.00373876	0.0213134	fASV152	Fungi	Zoopagomycota	Zoopagomycetes	Zoopagales	Piptocephalidaceae	Syncephalis	unidentified	0.9980132	CK
542.301	-0.501491	0.128733	-3.89558	9.79633e-05	0.0011225	fASV23	Fungi	Ascomycota	Sordariomycetes	Hypocreales	Stachybotryaceae	Paramyrothecium	Unidentified	0.7725154	CK
214.317	-0.42003	0.0993923	-4.22598	2.37903e-05	0.00031154	fASV112	Fungi	Ascomycota	Sordariomycetes	Hypocreales	Unidentified	Unidentified	Unidentified	0.7758983	CK
800.188	-0.386581	0.12305	-3.14166	0.00167993	0.0109796	fASV26	Fungi	Ascomycota	Leotiomycetes	Thelebolales	Pseudeurotiaceae	Pseudeurotium	Pseudeurotium_hygrophilum	0.9947694	CK
116.528	-0.367079	0.107478	-3.41539	0.000636915	0.00515152	fASV150	Fungi	Ascomycota	Leotiomycetes	Helotiales	Helotiaceae	Tetracladium	Tetracladium_furcatum	0.9142370	CK
129.665	-0.29847	0.103024	-2.89708	0.00376652	0.0213134	fASV160	Fungi	Ascomycota	Leotiomycetes	Helotiales	Helotiaceae	Tetracladium	Unidentified	0.9930366	CK
196.605	-0.293075	0.100247	-2.92353	0.00346088	0.02069	fASV104	Fungi	Ascomycota	Sordariomycetes	Hypocreales	Clavicipitaceae	Metacordyceps	Metacordyceps_chlamydosporia	0.9983147	CK
1561.7	-0.290644	0.0824319	-3.52586	0.000422103	0.00386928	fASV14	Fungi	Ascomycota	Eurotiomycetes	Chaetothyriales	Herpotrichiellaceae	Exophiala	Exophiala_radicis	0.9990388	CK
490.051	-0.286097	0.10767	-2.65717	0.00788004	0.0386966	fASV43	Fungi	Ascomycota	Leotiomycetes	Thelebolales	Pseudeurotiaceae	Pseudeurotium	Pseudeurotium_hygrophilum	0.8724162	CK
239.96	0.353288	0.133427	2.6478	0.00810183	0.0390878	fASV204	Fungi	Ascomycota	Sordariomycetes	Microascales	Microascaceae	Mycochlamys	Mycochlamys_macrospora	0.9995412	CK
3158.92	0.372207	0.117202	3.17576	0.00149443	0.0105376	fASV9	Fungi	Ascomycota	Sordariomycetes	Hypocreales	Nectriaceae	Fusarium	Fusarium_hostae	0.8415825	CK
83.9841	0.498723	0.121386	4.10857	3.98121e-05	0.000497651	fASV305	Fungi	Chytridiomycota	unidentified	unidentified	unidentified	unidentified	unidentified	0.7331764	CK
23.4253	0.546373	0.198389	2.75405	0.00588636	0.0311298	fASV631	Fungi	Ascomycota	Sordariomycetes	Xylariales	Unidentified	Unidentified	Unidentified	0.9665749	CK
32.982	0.628175	0.18652	3.36787	0.000757518	0.00595192	fASV713	Fungi	Chytridiomycota	unidentified	unidentified	unidentified	unidentified	unidentified	0.7894388	CK
76.025	0.673098	0.202363	3.3262	0.000880399	0.00654351	fASV435	Fungi	Ascomycota	Sordariomycetes	Hypocreales	Nectriaceae	Fusicolla	Fusicolla_aquaeductuum	0.9869928	CK
42.4637	0.821577	0.245176	3.35096	0.000805312	0.00615169	fASV369	Fungi	Ascomycota	Sordariomycetes	Hypocreales	Hypocreaceae	Trichoderma	Trichoderma_foliicola	0.8775457	CK
3.43624	0.896558	0.293999	3.04952	0.00229204	0.0143253	fASV381	Fungi	Ascomycota	Eurotiomycetes	Eurotiales	Trichocomaceae	Talaromyces	Talaromyces_aculeatus	0.8630787	CK
41.1265	0.926541	0.199645	4.64094	3.46835e-06	5.01998e-05	fASV545	Fungi	Ascomycota	Saccharomycetes	Saccharomycetales	Saccharomycetales_fam_Incertae_sedis	Candida	Candida_sake	0.9843489	CK
34.3565	0.972782	0.33608	2.8945	0.00379765	0.0213134	fASV560	Fungi	Ascomycota	Sordariomycetes	Sordariales	Lasiosphaeriaceae	Unidentified	Unidentified	0.9998975	CK
15.7507	0.994221	0.36186	2.74753	0.0060046	0.0311559	fASV394	Fungi	Ascomycota	Sordariomycetes	Sordariales	Lasiosphaeriaceae	Unidentified	Unidentified	0.9997274	CK
800.37	1.1258	0.313174	3.5948	0.000324636	0.00307845	fASV2	Fungi	Ascomycota	Sordariomycetes	Sordariales	Chaetomiaceae	Chaetomium	Unidentified	0.9913247	CK
6.61122	1.27623	0.362965	3.51612	0.00043791	0.00388468	fASV166	Fungi	Ascomycota	Eurotiomycetes	Eurotiales	Trichocomaceae	Talaromyces	Unidentified	0.9999999	CK
21.0188	1.28487	0.396685	3.23902	0.00119942	0.00868004	fASV212	Fungi	Chytridiomycota	Chytridiomycetes	Chytridiales	Chytridiaceae	Phlyctochytrium	Phlyctochytrium_africanum	0.9999984	CK
13.3482	1.28812	0.431054	2.98829	0.00280541	0.0171441	fASV51	Fungi	Ascomycota	Pezizomycetes	Pezizales	Pezizaceae	unidentified	unidentified	0.9902210	CK
11.3765	1.36704	0.360876	3.78812	0.000151794	0.00160551	fASV280	Fungi	Basidiomycota	Malasseziomycetes	Malasseziales	Malasseziaceae	Malassezia	Malassezia_restricta	0.9999628	CK
11.4364	1.38083	0.347436	3.97433	7.05764e-05	0.000843848	fASV895	Fungi	Basidiomycota	Tremellomycetes	Tremellales	Tremellaceae	Cryptococcus	Unidentified	0.9537117	CK
66.0944	1.40051	0.260421	5.37785	7.5381e-08	2.07298e-06	fASV643	Fungi	Ascomycota	Sordariomycetes	Hypocreales	Hypocreales_fam_Incertae_sedis	Acremonium	Acremonium_biseptum	0.9387453	CK
17.7028	1.46397	0.37766	3.87641	0.000106009	0.0011661	fASV85	Fungi	Ascomycota	Sordariomycetes	Hypocreales	Hypocreales_fam_Incertae_sedis	Acremonium	Acremonium_alternatum	0.9770246	CK
29.2666	1.57995	0.305661	5.16895	2.35411e-07	5.39484e-06	fASV218	Fungi	Ascomycota	Leotiomycetes	Helotiales	Helotiaceae	Scytalidium	Scytalidium_circinatum	0.9323935	CK
56.4788	1.61107	0.230296	6.99564	2.64054e-12	1.81537e-10	fASV637	Fungi	Ascomycota	Unidentified	Unidentified	Unidentified	Unidentified	Unidentified	0.8678364	CK
596.123	1.75624	0.357669	4.91024	9.09638e-07	1.56344e-05	fASV142	Fungi	Zoopagomycota	Zoopagomycetes	Zoopagales	Piptocephalidaceae	Syncephalis	unidentified	0.9998106	CK
5.81639	1.7691	0.36331	4.8694	1.11939e-06	1.81077e-05	fASV723	Fungi	Ascomycota	Sordariomycetes	Sordariales	Lasiosphaeriaceae	Schizothecium	Schizothecium_miniglutinans	0.9237182	CK
34.5281	1.78641	0.377773	4.7288	2.25847e-06	3.45044e-05	fASV237	Fungi	Ascomycota	Sordariomycetes	Hypocreales	Nectriaceae	Gibberella	Gibberella_intricans	0.8101486	CK
45.1619	1.79731	0.264252	6.8015	1.03536e-11	5.69447e-10	fASV776	Fungi	Basidiomycota	Unidentified	Unidentified	Unidentified	Unidentified	Unidentified	0.8790819	CK
371.852	1.87013	0.367384	5.09041	3.57296e-07	7.23724e-06	fASV111	Fungi	Ascomycota	Sordariomycetes	Sordariales	Lasiosphaeriaceae	Apodus	Apodus_deciduus	0.9999761	CK
12.4753	1.9348	0.437516	4.42223	9.76875e-06	0.00013432	fASV891	Fungi	Ascomycota	Sordariomycetes	Sordariales	Lasiosphaeriaceae	Unidentified	Unidentified	0.9870101	CK
30.6397	2.09301	0.411639	5.08458	3.68441e-07	7.23724e-06	fASV58	Fungi	Ascomycota	Unidentified	Unidentified	Unidentified	Unidentified	Unidentified	0.9619988	CK
480.638	2.28727	0.307979	7.4267	1.11341e-13	1.02063e-11	fASV5	Fungi	Ascomycota	Sordariomycetes	Hypocreales	Hypocreales_fam_Incertae_sedis	Sarocladium	Sarocladium_zeae	0.7745448	CK
47.0346	2.28762	0.355881	6.42805	1.29254e-10	5.92416e-09	fASV652	Fungi	Zoopagomycota	Zoopagomycetes	Zoopagales	Piptocephalidaceae	Syncephalis	unidentified	0.9997787	CK
21.1364	2.49256	0.462376	5.39077	7.01564e-08	2.07298e-06	fASV565	Fungi	Ascomycota	Sordariomycetes	Sordariales	Lasiosphaeriaceae	Apodus	Apodus_deciduus	0.9998674	CK
15.15	-1.59181	0.399408	-3.98542	6.73611e-05	0.00115356	fASV395	Fungi	Ascomycota	Sordariomycetes	Sordariales	Lasiosphaeriaceae	Unidentified	Unidentified	0.9839107	LN
5.93144	-1.56954	0.316474	-4.95948	7.06825e-07	3.8734e-05	fASV1585	Fungi	Ascomycota	Sordariomycetes	unidentified	unidentified	unidentified	unidentified	0.7176870	LN
9.95159	-1.53749	0.36224	-4.2444	2.19182e-05	0.000461968	fASV857	Fungi	Ascomycota	Leotiomycetes	Helotiales	Helotiaceae	Tetracladium	Unidentified	0.9671505	LN
25.4962	-1.52679	0.405163	-3.76834	0.000164335	0.00204672	fASV505	Fungi	Ascomycota	Leotiomycetes	Thelebolales	Pseudeurotiaceae	Pseudeurotium	Pseudeurotium_hygrophilum	0.8101728	LN
45.8689	-1.29073	0.301414	-4.28224	1.85019e-05	0.000422459	fASV228	Fungi	Ascomycota	Dothideomycetes	Venturiales	Sympoventuriaceae	Ochroconis	Ochroconis_tshawytschae	1.0000000	LN
15.6247	-1.19272	0.333619	-3.57508	0.000350115	0.00368967	fASV912	Fungi	Chytridiomycota	Spizellomycetes	Spizellomycetales	Powellomycetaceae	unidentified	unidentified	0.9999985	LN
8.93174	-1.17951	0.228189	-5.16903	2.35316e-07	1.61191e-05	fASV482	Fungi	Ascomycota	Sordariomycetes	Hypocreales	Ophiocordycipitaceae	Purpureocillium	Purpureocillium_lilacinum	0.9979205	LN
160.78	-1.16982	0.341368	-3.42685	0.000610623	0.00522846	fASV155	Fungi	Chytridiomycota	Spizellomycetes	Spizellomycetales	Powellomycetaceae	unidentified	unidentified	1.0000000	LN
9.26043	-1.07029	0.353264	-3.02973	0.00244772	0.0158032	fASV547	Fungi	Mortierellomycota	Mortierellomycetes	Mortierellales	Mortierellaceae	Mortierella	Mortierella_alpina	0.9942799	LN
55.9214	-1.02551	0.252867	-4.05552	5.00219e-05	0.000979	fASV66	Fungi	Ascomycota	Dothideomycetes	Capnodiales	Cladosporiaceae	Cladosporium	Unidentified	0.9732333	LN
25.6996	-0.997999	0.327779	-3.04473	0.00232892	0.0156087	fASV100	Fungi	Ascomycota	Sordariomycetes	Microascales	Microascaceae	Mycochlamys	Mycochlamys_macrospora	0.9996817	LN
9.99521	-0.983919	0.326674	-3.01193	0.00259596	0.0161658	fASV248	Fungi	Mucoromycota	Mucoromycetes	Mucorales	Rhizopodaceae	Rhizopus	Rhizopus_arrhizus	1.0000000	LN
23.9338	-0.933156	0.367911	-2.53636	0.0112011	0.0479545	fASV237	Fungi	Ascomycota	Sordariomycetes	Hypocreales	Nectriaceae	Gibberella	Gibberella_intricans	0.8101486	LN
16.6342	-0.919493	0.361547	-2.54322	0.0109836	0.0477699	fASV21	Fungi	Ascomycota	Dothideomycetes	Capnodiales	Mycosphaerellaceae	Mycosphaerella	Mycosphaerella_tassiana	0.9976942	LN
14.3552	-0.902765	0.337353	-2.67602	0.00745013	0.0364524	fASV460	Fungi	Basidiomycota	Cystobasidiomycetes	Cystobasidiales	Cystobasidiaceae	Occultifur	unidentified	0.9288970	LN
4.46755	-0.896135	0.294407	-3.04386	0.00233561	0.0156087	fASV182	Fungi	Ascomycota	Sordariomycetes	Sordariales	Sordariales_fam_Incertae_sedis	Ramophialophora	unidentified	0.9874987	LN
9.84035	-0.895071	0.321352	-2.78533	0.00534741	0.0299018	fASV409	Fungi	Ascomycota	Eurotiomycetes	Eurotiales	Aspergillaceae	Penicillium	Penicillium_brasilianum	0.9818971	LN
6.42094	-0.849843	0.314224	-2.70458	0.00683908	0.0340711	fASV147	Fungi	Ascomycota	Dothideomycetes	Pleosporales	Leptosphaeriaceae	Plenodomus	Plenodomus_biglobosus	1.0000000	LN
14.8946	-0.797166	0.271045	-2.94108	0.00327067	0.0199147	fASV496	Fungi	Ascomycota	Sordariomycetes	Hypocreales	Bionectriaceae	Valsonectria	Valsonectria_pulchella	0.9099971	LN
6.65592	-0.790139	0.234281	-3.37261	0.000744584	0.00600047	fASV1055	Fungi	Ascomycota	Eurotiomycetes	Eurotiales	Aspergillaceae	Penicillium	Unidentified	0.9999959	LN
45.5564	-0.780602	0.171799	-4.54368	5.52799e-06	0.000168297	fASV198	Fungi	Ascomycota	Eurotiomycetes	Onygenales	Onygenales_fam_Incertae_sedis	Chrysosporium	Chrysosporium_merdarium	0.9999472	LN
28.0232	-0.640838	0.218781	-2.92912	0.00339922	0.0202475	fASV553	Fungi	Ascomycota	Eurotiomycetes	Onygenales	Onygenales_fam_Incertae_sedis	Chrysosporium	Chrysosporium_pseudomerdarium	0.9755945	LN
54.2041	-0.628647	0.160279	-3.92221	8.77406e-05	0.00134326	fASV262	Fungi	Ascomycota	Sordariomycetes	Hypocreales	Stachybotryaceae	Striatibotrys	Striatibotrys_eucylindrospora	0.9916520	LN
136.009	-0.519771	0.136197	-3.81632	0.000135457	0.00176739	fASV108	Fungi	Ascomycota	Sordariomycetes	Sordariales	Chaetomiaceae	Dichotomopilus	Dichotomopilus_pratensis	0.9999990	LN
47.0449	-0.519391	0.146372	-3.54842	0.000387546	0.00379241	fASV370	Fungi	Ascomycota	Sordariomycetes	Microascales	Microascales_fam_Incertae_sedis	Seychellomyces	Seychellomyces_hexagonus	0.7090285	LN
266.612	-0.413026	0.0891479	-4.63304	3.60341e-06	0.000141048	fASV96	Fungi	Ascomycota	Leotiomycetes	Helotiales	Helotiaceae	Tetracladium	Unidentified	0.9794732	LN
142.55	-0.380687	0.120218	-3.16663	0.00154218	0.0117377	fASV60	Fungi	Ascomycota	Eurotiomycetes	Eurotiales	Aspergillaceae	Penicillium	Unidentified	0.9999839	LN
67.6037	-0.375002	0.121339	-3.09052	0.00199809	0.0140379	fASV220	Fungi	Ascomycota	Sordariomycetes	Unidentified	Unidentified	Unidentified	Unidentified	0.8133414	LN
256.046	-0.24465	0.0951744	-2.57054	0.0101539	0.044935	fASV112	Fungi	Ascomycota	Sordariomycetes	Hypocreales	Unidentified	Unidentified	Unidentified	0.7758983	LN
86.8109	0.527829	0.201817	2.61539	0.00891268	0.0413911	fASV238	Fungi	Ascomycota	Sordariomycetes	Hypocreales	Hypocreaceae	Trichoderma	Trichoderma_turrialbense	0.9932605	LN
448.561	0.549475	0.147796	3.71779	0.000200974	0.00239421	fASV57	Fungi	Ascomycota	Eurotiomycetes	Eurotiales	Trichocomaceae	Talaromyces	Talaromyces_aculeatus	0.9275961	LN
215.448	0.66234	0.229692	2.8836	0.00393152	0.0224424	fASV2	Fungi	Ascomycota	Sordariomycetes	Sordariales	Chaetomiaceae	Chaetomium	Unidentified	0.9913247	LN
24.0198	0.673074	0.261889	2.57007	0.0101678	0.044935	fASV545	Fungi	Ascomycota	Saccharomycetes	Saccharomycetales	Saccharomycetales_fam_Incertae_sedis	Candida	Candida_sake	0.9843489	LN
5.61896	0.67715	0.261586	2.58864	0.00963571	0.0440031	fASV471	Fungi	Ascomycota	Eurotiomycetes	Eurotiales	Aspergillaceae	Penicillium	Unidentified	0.9997633	LN
112.178	0.810644	0.257759	3.14497	0.00166104	0.0123007	fASV76	Fungi	Ascomycota	Sordariomycetes	Sordariales	Lasiosphaeriaceae	Unidentified	Unidentified	0.9993323	LN
49.8	0.811046	0.306749	2.64401	0.0081931	0.0393844	fASV275	Fungi	Ascomycota	Pezizomycetes	Pezizales	Pyronemataceae	unidentified	unidentified	0.7484433	LN
11.5057	0.81208	0.29779	2.72702	0.00639089	0.0336751	fASV793	Fungi	Ascomycota	Saccharomycetes	Saccharomycetales	Phaffomycetaceae	Cyberlindnera	Cyberlindnera_sargentensis	0.9998774	LN
9.8246	0.843961	0.334485	2.52316	0.0116304	0.0490266	fASV625	Fungi	Chytridiomycota	Rhizophlyctidomycetes	Rhizophlyctidales	Rhizophlyctidaceae	Rhizophlyctis	Unidentified	0.8912213	LN
12.5446	0.854633	0.311173	2.74649	0.00602361	0.0323622	fASV279	Fungi	Ascomycota	Sordariomycetes	Sordariales	Chaetomiaceae	Botryotrichum	Botryotrichum_atrogriseum	0.9590280	LN
42.0467	0.868398	0.320871	2.70638	0.00680209	0.0340711	fASV234	Fungi	Mortierellomycota	Mortierellomycetes	Mortierellales	Mortierellaceae	Mortierella	Mortierella_alpina	0.9957376	LN
25.4998	0.879161	0.316979	2.77356	0.00554464	0.0303846	fASV30	Fungi	Ascomycota	Eurotiomycetes	Eurotiales	Aspergillaceae	Penicillium	Penicillium_astrolabium	0.9996795	LN
4.10414	0.974722	0.296675	3.28548	0.00101807	0.00797006	fASV927	Fungi	Zoopagomycota	Zoopagomycetes	Zoopagales	Piptocephalidaceae	Syncephalis	unidentified	0.9999989	LN
14.9106	1.03093	0.354508	2.90806	0.00363678	0.0212017	fASV771	Fungi	Basidiomycota	Pucciniomycetes	Platygloeales	Unidentified	Unidentified	Unidentified	0.9998458	LN
42.303	1.03999	0.335712	3.09787	0.00194916	0.0140379	fASV257	Fungi	Ascomycota	Sordariomycetes	Hypocreales	Nectriaceae	Gibberella	Gibberella_intricans	0.7264066	LN
5.15417	1.07016	0.297594	3.59603	0.000323116	0.00354136	fASV536	Fungi	Ascomycota	Dothideomycetes	Pleosporales	Unidentified	Unidentified	Unidentified	0.8801631	LN
27.3478	1.07428	0.408493	2.62986	0.00854196	0.0403534	fASV394	Fungi	Ascomycota	Sordariomycetes	Sordariales	Lasiosphaeriaceae	Unidentified	Unidentified	0.9997274	LN
58.9043	1.12206	0.30672	3.65825	0.000253947	0.00289923	fASV265	Fungi	Ascomycota	Sordariomycetes	Sordariales	Lasiosphaeriaceae	Schizothecium	Schizothecium_miniglutinans	0.8162594	LN
40.9689	1.12797	0.317098	3.55718	0.000374857	0.00379241	fASV326	Fungi	Ascomycota	Sordariomycetes	Hypocreales	Unidentified	Unidentified	Unidentified	0.9584118	LN
32.8443	1.13121	0.373858	3.02576	0.00248006	0.0158032	fASV580	Fungi	Ascomycota	Leotiomycetes	Helotiales	Leotiaceae	Neobulgaria	unidentified	0.9991200	LN
11.6659	1.13131	0.288539	3.92083	8.82434e-05	0.00134326	fASV664	Fungi	Ascomycota	Sordariomycetes	Hypocreales	Hypocreaceae	Monocillium	Monocillium_indicum	0.9999989	LN
41.3013	1.13577	0.418726	2.71246	0.00667867	0.0340711	fASV527	Fungi	Basidiomycota	Agaricomycetes	Unidentified	Unidentified	Unidentified	Unidentified	0.7512040	LN
10.4411	1.17227	0.344789	3.39996	0.00067396	0.00559591	fASV280	Fungi	Basidiomycota	Malasseziomycetes	Malasseziales	Malasseziaceae	Malassezia	Malassezia_restricta	0.9999628	LN
21.3238	1.18616	0.342912	3.45908	0.000542024	0.0048479	fASV85	Fungi	Ascomycota	Sordariomycetes	Hypocreales	Hypocreales_fam_Incertae_sedis	Acremonium	Acremonium_alternatum	0.9770246	LN
14.5227	1.25742	0.363849	3.45589	0.000548485	0.0048479	fASV802	Fungi	Ascomycota	Dothideomycetes	Pleosporales	Thyridariaceae	Roussoella	Roussoella_mexicana	0.9935534	LN
8.4927	1.31045	0.336792	3.89098	9.98396e-05	0.0013678	fASV313	Fungi	Ascomycota	Sordariomycetes	Hypocreales	Bionectriaceae	Hydropisphaera	unidentified	0.8973322	LN
9.65417	1.33776	0.333895	4.00653	6.16168e-05	0.00112553	fASV322	Fungi	Ascomycota	Sordariomycetes	Sordariales	Chaetomiaceae	Unidentified	Unidentified	0.9980065	LN
240.819	1.34046	0.254435	5.2684	1.37616e-07	1.25689e-05	fASV65	Fungi	Ascomycota	Sordariomycetes	Sordariales	Sordariales_fam_Incertae_sedis	Ramophialophora	unidentified	0.9945470	LN
4.99126	1.36482	0.305487	4.46767	7.90771e-06	0.000216671	fASV878	Fungi	Ascomycota	Sordariomycetes	Sordariales	Chaetomiaceae	Chaetomium	Chaetomium_elatum	0.8096515	LN
4.96271	1.50955	0.319788	4.72047	2.35301e-06	0.000107454	fASV565	Fungi	Ascomycota	Sordariomycetes	Sordariales	Lasiosphaeriaceae	Apodus	Apodus_deciduus	0.9998674	LN
8.27095	1.53645	0.334303	4.59599	4.30708e-06	0.000147517	fASV938	Fungi	Ascomycota	Sordariomycetes	Coniochaetales	Coniochaetaceae	Lecythophora	unidentified	0.9989392	LN
25.2348	1.59966	0.460992	3.47003	0.000520397	0.0048479	fASV515	Fungi	Ascomycota	Sordariomycetes	Sordariales	Sordariaceae	Neurospora	Neurospora_terricola	0.9897507	LN
87.479	1.61199	0.364081	4.42756	9.53071e-06	0.000237401	fASV13	Fungi	Ascomycota	Eurotiomycetes	Eurotiales	Trichocomaceae	Talaromyces	Unidentified	0.9999337	LN
17.2359	1.66828	0.4272	3.90515	9.41676e-05	0.001358	fASV997	Fungi	Ascomycota	Sordariomycetes	Sordariales	Lasiosphaeriaceae	Schizothecium	Schizothecium_miniglutinans	0.8365138	LN
15.3407	2.1534	0.371875	5.79066	7.01092e-09	9.60497e-07	fASV450	Fungi	Basidiomycota	Agaricomycetes	Cantharellales	Cantharellales_fam_Incertae_sedis	unidentified	unidentified	1.0000000	LN
25.3569	3.19162	0.416915	7.65533	1.92809e-14	5.28298e-12	fASV113	Fungi	Basidiomycota	Agaricomycetes	Cantharellales	Cantharellales_fam_Incertae_sedis	Minimedusa	Minimedusa_polyspora	0.9999999	LN
57.025	-2.17308	0.389511	-5.57899	2.41926e-08	2.20152e-06	fASV12	Fungi	Ascomycota	Dothideomycetes	Unidentified	Unidentified	Unidentified	Unidentified	0.7839983	LP
14.4289	-1.39976	0.388425	-3.60367	0.000313754	0.00611821	fASV303	Fungi	Ascomycota	Sordariomycetes	Microascales	Microascaceae	Mycochlamys	Mycochlamys_macrospora	0.9993316	LP
45.6292	-1.08535	0.326468	-3.32452	0.000885721	0.0134334	fASV580	Fungi	Ascomycota	Leotiomycetes	Helotiales	Leotiaceae	Neobulgaria	unidentified	0.9991200	LP
6.28583	-1.03869	0.325193	-3.19407	0.0014028	0.0191483	fASV515	Fungi	Ascomycota	Sordariomycetes	Sordariales	Sordariaceae	Neurospora	Neurospora_terricola	0.9897507	LP
17.3942	-0.903662	0.246276	-3.6693	0.000243216	0.00513831	fASV644	Fungi	Ascomycota	Sordariomycetes	Unidentified	Unidentified	Unidentified	Unidentified	0.8300801	LP
4.24284	-0.856662	0.29643	-2.88993	0.00385325	0.0437801	fASV1585	Fungi	Ascomycota	Sordariomycetes	unidentified	unidentified	unidentified	unidentified	0.7176870	LP
12.3177	-0.699084	0.206833	-3.37994	0.000725024	0.0123707	fASV545	Fungi	Ascomycota	Saccharomycetes	Saccharomycetales	Saccharomycetales_fam_Incertae_sedis	Candida	Candida_sake	0.9843489	LP
32.8717	-0.49991	0.16957	-2.94811	0.00319727	0.0380393	fASV66	Fungi	Ascomycota	Dothideomycetes	Capnodiales	Cladosporiaceae	Cladosporium	Unidentified	0.9732333	LP
102.591	-0.477445	0.165927	-2.87744	0.00400917	0.0437801	fASV82	Fungi	Ascomycota	Sordariomycetes	Unidentified	Unidentified	Unidentified	Unidentified	0.7011443	LP
337.305	-0.396461	0.0861462	-4.6022	4.18061e-06	0.000285326	fASV105	Fungi	Ascomycota	Leotiomycetes	Helotiales	Helotiaceae	Tetracladium	Unidentified	0.9825131	LP
429.599	-0.290916	0.101984	-2.85256	0.0043369	0.0438508	fASV70	Fungi	Ascomycota	Sordariomycetes	Xylariales	Bartaliniaceae	Truncatella	Unidentified	0.8380336	LP
982.36	-0.284228	0.063336	-4.48762	7.20245e-06	0.000393254	fASV25	Fungi	Ascomycota	Leotiomycetes	Helotiales	Helotiaceae	Tetracladium	unidentified	0.9732388	LP
85.3409	0.487963	0.129465	3.76908	0.000163848	0.00406642	fASV307	Fungi	Ascomycota	Sordariomycetes	Hypocreales	Nectriaceae	Fusarium	Fusarium_cuneirostrum	0.9997408	LP
173.017	0.675066	0.240261	2.80972	0.00495847	0.046678	fASV76	Fungi	Ascomycota	Sordariomycetes	Sordariales	Lasiosphaeriaceae	Unidentified	Unidentified	0.9993323	LP
382.481	0.695824	0.246044	2.82804	0.00468333	0.0456625	fASV63	Fungi	Ascomycota	Sordariomycetes	Sordariales	Lasiosphaeriaceae	Apodus	Apodus_deciduus	0.9999761	LP
3.29098	0.778696	0.260889	2.98478	0.00283781	0.0368915	fASV134	Fungi	Ascomycota	Dothideomycetes	Pleosporales	Didymosphaeriaceae	Pseudopithomyces	Pseudopithomyces_rosae	0.9552036	LP
10.776	0.859358	0.2343	3.66776	0.000244682	0.00513831	fASV1055	Fungi	Ascomycota	Eurotiomycetes	Eurotiales	Aspergillaceae	Penicillium	Unidentified	0.9999959	LP
18.9165	0.899343	0.236699	3.79952	0.000144978	0.00395791	fASV482	Fungi	Ascomycota	Sordariomycetes	Hypocreales	Ophiocordycipitaceae	Purpureocillium	Purpureocillium_lilacinum	0.9979205	LP
4.22613	0.915802	0.319926	2.86254	0.0042026	0.0438508	fASV878	Fungi	Ascomycota	Sordariomycetes	Sordariales	Chaetomiaceae	Chaetomium	Chaetomium_elatum	0.8096515	LP
18.7407	0.933403	0.240432	3.88218	0.000103523	0.00314019	fASV696	Fungi	Ascomycota	Sordariomycetes	Unidentified	Unidentified	Unidentified	Unidentified	0.9302381	LP
9.53055	0.972891	0.330087	2.94738	0.00320478	0.0380393	fASV450	Fungi	Basidiomycota	Agaricomycetes	Cantharellales	Cantharellales_fam_Incertae_sedis	unidentified	unidentified	1.0000000	LP
5.08637	1.10471	0.323525	3.41459	0.000638782	0.0116258	fASV565	Fungi	Ascomycota	Sordariomycetes	Sordariales	Lasiosphaeriaceae	Apodus	Apodus_deciduus	0.9998674	LP
402.563	1.13462	0.339824	3.33885	0.000841268	0.0134334	fASV84	Fungi	Ascomycota	Sordariomycetes	Xylariales	Microdochiaceae	Microdochium	unidentified	0.7617071	LP
14.2339	1.35341	0.411716	3.28724	0.00101176	0.0145373	fASV562	Fungi	Ascomycota	Leotiomycetes	Thelebolales	Pseudeurotiaceae	Pseudeurotium	Pseudeurotium_hygrophilum	0.9963647	LP
541.447	1.41141	0.334102	4.22447	2.39499e-05	0.00108972	fASV5	Fungi	Ascomycota	Sordariomycetes	Hypocreales	Hypocreales_fam_Incertae_sedis	Sarocladium	Sarocladium_zeae	0.7745448	LP
58.0073	1.57428	0.39903	3.94527	7.97113e-05	0.00272015	fASV13	Fungi	Ascomycota	Eurotiomycetes	Eurotiales	Trichocomaceae	Talaromyces	Unidentified	0.9999337	LP
11.3576	1.58012	0.392328	4.02756	5.63581e-05	0.00219797	fASV48	Fungi	Ascomycota	Sordariomycetes	Sordariales	Chaetomiaceae	Chaetomium	Chaetomium_elatum	0.7796598	LP
9.13052	1.672	0.297296	5.624	1.86582e-08	2.20152e-06	fASV625	Fungi	Chytridiomycota	Rhizophlyctidomycetes	Rhizophlyctidales	Rhizophlyctidaceae	Rhizophlyctis	Unidentified	0.8912213	LP
23.2901	1.89648	0.325206	5.83164	5.48857e-09	1.49838e-06	fASV109	Fungi	Basidiomycota	Agaricomycetes	Cantharellales	Cantharellales_fam_Incertae_sedis	Minimedusa	Minimedusa_polyspora	0.9999999	LP

## Sheet: Table S6
Table S6 Differentally expressed genes between hybrids and inbred lines under each soil condition. CK: control soil; LN: low nitrogen soil; LP: low phosphorus soil
geneID	baseMean	log2FoldChange	lfcSE	stat	pvalue	padj	Treatment
Zm00001eb083610	14.9783	-3.44717	0.759626	-4.53798	5.67957e-06	9.6751e-05	CK
Zm00001eb018900	35.3377	-2.82621	0.611364	-4.6228	3.78602e-06	6.8984e-05	CK
Zm00001eb062030	15.1285	-2.48771	0.651724	-3.81713	0.000135013	0.00128	CK
Zm00001eb106090	18.2651	-2.41187	0.692387	-3.48342	0.00049506	0.00364402	CK
Zm00001eb221760	18.3069	-2.39015	0.779279	-3.06712	0.0021613	0.0119531	CK
Zm00001eb142990	14.7974	-2.35944	0.71168	-3.31531	0.00091541	0.00599584	CK
Zm00001eb073090	26.6891	-2.35312	0.644633	-3.65033	0.000261903	0.00220191	CK
Zm00001eb294860	18.0166	-2.19366	0.647392	-3.38845	0.000702881	0.00484789	CK
Zm00001eb365050	21.6757	-2.1081	0.735318	-2.86693	0.00414477	0.0199068	CK
Zm00001eb335210	27.5683	-2.1062	0.69993	-3.00916	0.00261975	0.0138806	CK
Zm00001eb301190	24.7694	-2.06491	0.766103	-2.69534	0.00703176	0.0303559	CK
Zm00001eb003820	29.6136	-1.96236	0.547552	-3.58388	0.00033853	0.00269618	CK
Zm00001eb090260	203.03	-1.9267	0.295942	-6.5104	7.49502e-11	1.29736e-08	CK
Zm00001eb090910	675.848	-1.90316	0.295447	-6.44165	1.18183e-10	1.77495e-08	CK
Zm00001eb111390	537.154	-1.8962	0.358731	-5.28585	1.2512e-07	4.37391e-06	CK
Zm00001eb239700	34.8691	-1.88464	0.507267	-3.71529	0.000202973	0.0017958	CK
Zm00001eb415520	101.455	-1.88007	0.436745	-4.30474	1.67186e-05	0.000234554	CK
Zm00001eb050970	277.059	-1.87045	0.458944	-4.07555	4.59051e-05	0.000535784	CK
Zm00001eb236420	125.849	-1.82239	0.562771	-3.23825	0.00120265	0.00744983	CK
Zm00001eb408900	60.1953	-1.81298	0.470051	-3.857	0.000114789	0.00111688	CK
Zm00001eb166210	35.7472	-1.80852	0.445669	-4.05799	4.9497e-05	0.000569654	CK
Zm00001eb197900	23.7772	-1.79791	0.540193	-3.32827	0.000873862	0.00577125	CK
Zm00001eb043700	27.8331	-1.76778	0.451023	-3.91949	8.87374e-05	0.000907845	CK
Zm00001eb239450	37.1106	-1.74363	0.388487	-4.48827	7.18028e-06	0.000117557	CK
Zm00001eb145880	19.43	-1.74116	0.592404	-2.93914	0.00329124	0.0165518	CK
Zm00001eb166200	80.1868	-1.73603	0.609982	-2.84603	0.00442678	0.0210167	CK
Zm00001eb003470	16.6774	-1.73422	0.649461	-2.67024	0.00757977	0.0322354	CK
Zm00001eb266840	532.647	-1.72786	0.502857	-3.43609	0.00059017	0.00422017	CK
Zm00001eb354370	24.7939	-1.72624	0.543412	-3.17667	0.00148979	0.00887324	CK
Zm00001eb042870	18.29	-1.70677	0.595174	-2.86769	0.00413485	0.019884	CK
Zm00001eb373150	21.7827	-1.70129	0.527916	-3.22265	0.00127011	0.00779947	CK
Zm00001eb347290	86.4018	-1.69122	0.375168	-4.50791	6.5469e-06	0.000108764	CK
Zm00001eb313450	158.703	-1.68035	0.259402	-6.47779	9.30767e-11	1.49415e-08	CK
Zm00001eb123640	34.5609	-1.67432	0.423817	-3.95058	7.79619e-05	0.000819076	CK
Zm00001eb177310	55.0364	-1.66194	0.3903	-4.2581	2.06171e-05	0.000276061	CK
Zm00001eb162650	25.0649	-1.66062	0.511465	-3.2468	0.00116711	0.00728708	CK
Zm00001eb199060	117.335	-1.6486	0.405678	-4.06382	4.82763e-05	0.000557698	CK
Zm00001eb269910	100.542	-1.64777	0.460101	-3.58132	0.00034186	0.00271967	CK
Zm00001eb112660	114.553	-1.64763	0.324527	-5.077	3.83434e-07	1.1047e-05	CK
Zm00001eb306310	177.694	-1.64414	0.383203	-4.29052	1.78253e-05	0.000246999	CK
Zm00001eb014010	35.4637	-1.63458	0.432206	-3.78194	0.000155611	0.00144465	CK
Zm00001eb391360	88.0686	-1.63428	0.398713	-4.09888	4.15147e-05	0.000492577	CK
Zm00001eb087080	31.3977	-1.6284	0.554167	-2.93846	0.00329846	0.0165804	CK
Zm00001eb155610	109.87	-1.62198	0.35497	-4.56934	4.8926e-06	8.46893e-05	CK
Zm00001eb076900	17.6683	-1.62125	0.605569	-2.67723	0.00742333	0.031702	CK
Zm00001eb091360	57.3675	-1.60583	0.536126	-2.99525	0.00274219	0.0143768	CK
Zm00001eb121350	51.8139	-1.60336	0.578184	-2.7731	0.00555246	0.025143	CK
Zm00001eb425050	42.8481	-1.60327	0.448678	-3.57332	0.000352483	0.0027856	CK
Zm00001eb176380	19.4414	-1.59943	0.573714	-2.78785	0.00530586	0.0242566	CK
Zm00001eb079430	50.5593	-1.58709	0.483938	-3.27953	0.00103979	0.00664427	CK
Zm00001eb017030	134.647	-1.58108	0.543635	-2.90836	0.00363333	0.0179072	CK
Zm00001eb362800	17.3041	-1.57732	0.578974	-2.72434	0.00644305	0.0282864	CK
Zm00001eb115210	40.8588	-1.57281	0.439905	-3.57535	0.000349762	0.00277022	CK
Zm00001eb402630	26.5308	-1.57084	0.58717	-2.67527	0.00746702	0.0318126	CK
Zm00001eb225660	21.1396	-1.56999	0.542245	-2.89535	0.00378734	0.0185216	CK
Zm00001eb335540	25.762	-1.56827	0.496764	-3.15698	0.00159415	0.00937961	CK
Zm00001eb328780	20.4002	-1.55498	0.572302	-2.71707	0.00658634	0.0287567	CK
Zm00001eb394210	466.295	-1.55296	0.238882	-6.50094	7.98223e-11	1.34906e-08	CK
Zm00001eb305660	26.2151	-1.54756	0.55167	-2.80522	0.00502817	0.0232096	CK
Zm00001eb381830	32.3991	-1.5473	0.502823	-3.07723	0.00208934	0.0116482	CK
Zm00001eb030030	40.4376	-1.54372	0.453346	-3.40516	0.000661244	0.00461259	CK
Zm00001eb242150	381.543	-1.53392	0.318707	-4.81295	1.4872e-06	3.25394e-05	CK
Zm00001eb423780	108.958	-1.53277	0.50131	-3.05754	0.00223164	0.0122381	CK
Zm00001eb384610	16.8764	-1.52802	0.605993	-2.52151	0.0116853	0.0452568	CK
Zm00001eb081550	17.9617	-1.52528	0.610306	-2.4992	0.0124473	0.0475982	CK
Zm00001eb089360	43.9142	-1.52429	0.443	-3.44084	0.000579921	0.00416441	CK
Zm00001eb147930	85.3862	-1.51534	0.484933	-3.12486	0.00177892	0.010239	CK
Zm00001eb206020	94.3804	-1.50587	0.399805	-3.76652	0.000165541	0.00152112	CK
Zm00001eb426520	69.5462	-1.50232	0.507981	-2.95744	0.00310204	0.0158529	CK
Zm00001eb100220	64.4041	-1.50177	0.380718	-3.94456	7.99469e-05	0.000836782	CK
Zm00001eb054430	28.9328	-1.50127	0.444747	-3.37555	0.000736679	0.00503569	CK
Zm00001eb372230	214.686	-1.49903	0.284481	-5.26936	1.36902e-07	4.68656e-06	CK
Zm00001eb087090	147.399	-1.49789	0.294175	-5.09185	3.54585e-07	1.03973e-05	CK
Zm00001eb279480	43.5805	-1.49692	0.444669	-3.36636	0.000761675	0.0051555	CK
Zm00001eb333560	90.7092	-1.4963	0.529039	-2.82834	0.00467905	0.0219666	CK
Zm00001eb417450	328.562	-1.49627	0.286034	-5.2311	1.685e-07	5.55558e-06	CK
Zm00001eb369770	47.9296	-1.49623	0.387001	-3.86621	0.00011054	0.0010834	CK
Zm00001eb313500	54.3092	-1.49585	0.510187	-2.93197	0.00336815	0.0168635	CK
Zm00001eb235070	78.4461	-1.48876	0.306094	-4.86373	1.15192e-06	2.67584e-05	CK
Zm00001eb183400	102.725	-1.48695	0.320181	-4.64409	3.41571e-06	6.35861e-05	CK
Zm00001eb022360	182.257	-1.48541	0.533147	-2.78611	0.0053344	0.0243508	CK
Zm00001eb179400	30.7179	-1.48527	0.55944	-2.65492	0.00793279	0.0334517	CK
Zm00001eb100200	169.053	-1.47851	0.369258	-4.00401	6.22778e-05	0.000686559	CK
Zm00001eb323330	22.2672	-1.47671	0.526288	-2.8059	0.00501763	0.0231709	CK
Zm00001eb267230	119.185	-1.47669	0.351015	-4.20692	2.58877e-05	0.000332329	CK
Zm00001eb087150	23.509	-1.47309	0.490619	-3.00252	0.00267754	0.014124	CK
Zm00001eb383870	132.8	-1.47262	0.327973	-4.49007	7.12e-06	0.000116748	CK
Zm00001eb245960	22.3331	-1.47234	0.554562	-2.65496	0.00793187	0.0334517	CK
Zm00001eb195210	118.526	-1.46908	0.370798	-3.96193	7.43461e-05	0.000791942	CK
Zm00001eb100930	94.4695	-1.46505	0.337035	-4.34688	1.38091e-05	0.000202182	CK
Zm00001eb133100	64.5241	-1.46243	0.342527	-4.26952	1.95896e-05	0.00026612	CK
Zm00001eb282430	33.3208	-1.46142	0.389432	-3.75268	0.000174951	0.00159049	CK
Zm00001eb074370	14.7272	-1.46132	0.576157	-2.53632	0.0112023	0.0437572	CK
Zm00001eb025420	162.249	-1.45182	0.251092	-5.78204	7.37982e-09	4.40001e-07	CK
Zm00001eb314130	28.2107	-1.44008	0.549142	-2.62242	0.00873071	0.0361071	CK
Zm00001eb157410	195.509	-1.43991	0.295761	-4.86847	1.12465e-06	2.62387e-05	CK
Zm00001eb263730	14.7541	-1.43949	0.388861	-3.70181	0.000214064	0.00187691	CK
Zm00001eb212010	36.0196	-1.43305	0.421591	-3.39915	0.000675951	0.00469572	CK
Zm00001eb042190	48.2991	-1.43012	0.524323	-2.72757	0.00638033	0.0280918	CK
Zm00001eb410910	39.4635	-1.43007	0.54968	-2.60164	0.00927801	0.0378671	CK
Zm00001eb424580	50.4265	-1.42871	0.437144	-3.26828	0.00108202	0.00685089	CK
Zm00001eb313410	92.7872	-1.42732	0.382325	-3.73326	0.00018902	0.00170038	CK
Zm00001eb338860	840.892	-1.41936	0.340077	-4.17365	2.99764e-05	0.00037495	CK
Zm00001eb252530	39.1059	-1.41743	0.39309	-3.60586	0.000311116	0.00252325	CK
Zm00001eb052950	18.3674	-1.41689	0.502708	-2.81851	0.00482471	0.0224686	CK
Zm00001eb141530	37.1018	-1.40927	0.427819	-3.29408	0.00098743	0.00636845	CK
Zm00001eb394220	73.8065	-1.40373	0.417406	-3.363	0.000771017	0.00520903	CK
Zm00001eb129140	16.7684	-1.40262	0.513236	-2.7329	0.00627785	0.0277202	CK
Zm00001eb164410	117.883	-1.40251	0.361159	-3.88335	0.000103026	0.00102282	CK
Zm00001eb378150	148.694	-1.39572	0.303433	-4.59975	4.22994e-06	7.58491e-05	CK
Zm00001eb144930	1939.35	-1.38895	0.379821	-3.65686	0.000255323	0.00215843	CK
Zm00001eb404810	23.0911	-1.38653	0.511717	-2.70958	0.00673694	0.0293131	CK
Zm00001eb422000	24.7316	-1.38625	0.46091	-3.00764	0.00263288	0.0139295	CK
Zm00001eb044960	180.969	-1.38472	0.297325	-4.65724	3.20472e-06	6.05511e-05	CK
Zm00001eb376530	824.967	-1.38345	0.266957	-5.18229	2.19179e-07	6.97514e-06	CK
Zm00001eb015520	23.9339	-1.38233	0.526372	-2.62615	0.00863579	0.0357559	CK
Zm00001eb078860	35.7616	-1.38192	0.413082	-3.34538	0.000821694	0.0055012	CK
Zm00001eb259590	45.5547	-1.38091	0.43138	-3.20116	0.00136878	0.00828523	CK
Zm00001eb330230	49.7327	-1.37838	0.346439	-3.97872	6.92866e-05	0.000747955	CK
Zm00001eb316130	33.8627	-1.37835	0.514057	-2.68133	0.0073331	0.0314042	CK
Zm00001eb218470	20.5729	-1.37661	0.382077	-3.60296	0.00031462	0.0025435	CK
Zm00001eb397110	306.314	-1.37389	0.279566	-4.91437	8.90674e-07	2.17243e-05	CK
Zm00001eb387960	18.1864	-1.35917	0.488826	-2.78048	0.00542779	0.0247298	CK
Zm00001eb013180	328.31	-1.35029	0.228495	-5.90949	3.43173e-09	2.39151e-07	CK
Zm00001eb419520	676.727	-1.35027	0.324198	-4.16495	3.11428e-05	0.000386833	CK
Zm00001eb254440	715.164	-1.34944	0.402276	-3.35452	0.000795037	0.00534105	CK
Zm00001eb137430	8867.12	-1.34731	0.407806	-3.30381	0.000953801	0.00620563	CK
Zm00001eb333290	1130.96	-1.34027	0.450324	-2.97623	0.0029182	0.015104	CK
Zm00001eb078290	45.5322	-1.34017	0.47963	-2.79419	0.00520305	0.0238476	CK
Zm00001eb217410	162.656	-1.33756	0.2743	-4.87626	1.08114e-06	2.53513e-05	CK
Zm00001eb151190	80.7538	-1.33471	0.265363	-5.02973	4.91164e-07	1.34469e-05	CK
Zm00001eb313440	244.661	-1.32673	0.338391	-3.92071	8.82868e-05	0.0009041	CK
Zm00001eb000580	257.063	-1.32652	0.282452	-4.69644	2.6474e-06	5.1476e-05	CK
Zm00001eb002760	148.538	-1.31589	0.286384	-4.59483	4.33111e-06	7.70837e-05	CK
Zm00001eb172420	4524.17	-1.31446	0.237139	-5.543	2.97328e-08	1.33518e-06	CK
Zm00001eb269810	94.6999	-1.31394	0.348898	-3.76599	0.00016589	0.00152361	CK
Zm00001eb047940	106.115	-1.31256	0.233769	-5.61479	1.96795e-08	9.49218e-07	CK
Zm00001eb259580	40.3886	-1.31218	0.370103	-3.54544	0.000391951	0.00303493	CK
Zm00001eb260750	126.519	-1.31156	0.349602	-3.75157	0.000175729	0.00159351	CK
Zm00001eb170920	46.9923	-1.3099	0.427823	-3.06177	0.00220034	0.0121098	CK
Zm00001eb225090	60.8501	-1.30918	0.426115	-3.07235	0.00212378	0.0118095	CK
Zm00001eb267050	54.262	-1.30911	0.433586	-3.01926	0.00253393	0.0135496	CK
Zm00001eb125920	94.3444	-1.30832	0.3321	-3.93955	8.16349e-05	0.000850588	CK
Zm00001eb033110	20.3574	-1.30831	0.523809	-2.49769	0.0125005	0.0477167	CK
Zm00001eb019370	163.719	-1.30567	0.224526	-5.81526	6.05396e-09	3.82183e-07	CK
Zm00001eb300040	17.6922	-1.30428	0.46481	-2.80606	0.00501521	0.0231659	CK
Zm00001eb006410	49.6292	-1.3038	0.412284	-3.16238	0.00156483	0.00924002	CK
Zm00001eb210350	28.291	-1.297	0.505651	-2.56501	0.0103172	0.0410773	CK
Zm00001eb214780	810.496	-1.29606	0.472184	-2.74482	0.00605446	0.0269572	CK
Zm00001eb123110	404.955	-1.29397	0.288091	-4.49155	7.07079e-06	0.000116208	CK
Zm00001eb195200	110.724	-1.28299	0.224475	-5.71554	1.09355e-08	5.94224e-07	CK
Zm00001eb138900	21.5177	-1.28255	0.410629	-3.12338	0.00178788	0.0102855	CK
Zm00001eb355030	80.1183	-1.28129	0.331716	-3.86262	0.00011218	0.00109646	CK
Zm00001eb427460	145.858	-1.27848	0.322774	-3.96092	7.46619e-05	0.000793338	CK
Zm00001eb317380	22.1686	-1.27624	0.445751	-2.86313	0.00419485	0.0200844	CK
Zm00001eb249200	1594.11	-1.27589	0.232947	-5.47718	4.32154e-08	1.81521e-06	CK
Zm00001eb194520	20.0425	-1.27533	0.424605	-3.00356	0.00266841	0.0140828	CK
Zm00001eb074360	63.7183	-1.27033	0.36325	-3.49712	0.000470308	0.00349791	CK
Zm00001eb127040	46.1018	-1.27008	0.337058	-3.76812	0.000164484	0.00151393	CK
Zm00001eb433740	15.5961	-1.26596	0.430769	-2.93884	0.00329444	0.0165641	CK
Zm00001eb298320	2701.69	-1.2656	0.19031	-6.65019	2.92705e-11	7.38094e-09	CK
Zm00001eb110660	17.8194	-1.26181	0.435997	-2.89408	0.0038027	0.0185694	CK
Zm00001eb416400	36.8787	-1.26052	0.427756	-2.94683	0.00321052	0.016264	CK
Zm00001eb168350	108.194	-1.25987	0.331334	-3.80242	0.00014329	0.00134657	CK
Zm00001eb200030	80.1704	-1.25759	0.378334	-3.32402	0.000887294	0.00584677	CK
Zm00001eb410040	39.7677	-1.25668	0.490405	-2.56253	0.0103912	0.0413107	CK
Zm00001eb328860	18.8629	-1.25653	0.507299	-2.4769	0.0132529	0.0499509	CK
Zm00001eb040610	177.363	-1.25493	0.350878	-3.57656	0.00034815	0.00275949	CK
Zm00001eb040900	144.976	-1.25296	0.306528	-4.08759	4.35873e-05	0.000513761	CK
Zm00001eb142640	119.093	-1.24941	0.383289	-3.2597	0.00111529	0.00702012	CK
Zm00001eb295850	954.978	-1.24673	0.20255	-6.15517	7.49967e-10	7.28384e-08	CK
Zm00001eb026630	374.118	-1.24654	0.219757	-5.67235	1.40852e-08	7.28491e-07	CK
Zm00001eb044430	39.0568	-1.24623	0.383009	-3.25378	0.00113879	0.0071387	CK
Zm00001eb071890	56.5551	-1.24416	0.413236	-3.01077	0.00260585	0.013824	CK
Zm00001eb060110	51.0769	-1.24364	0.389358	-3.19407	0.00140284	0.00844854	CK
Zm00001eb046920	104.321	-1.2426	0.384705	-3.23001	0.00123786	0.00763528	CK
Zm00001eb398560	174.63	-1.24175	0.290108	-4.28031	1.8663e-05	0.00025629	CK
Zm00001eb340440	557.161	-1.23723	0.249073	-4.96734	6.78764e-07	1.72823e-05	CK
Zm00001eb108780	81.1747	-1.2369	0.392221	-3.15358	0.0016128	0.00946552	CK
Zm00001eb064710	44.721	-1.23661	0.343479	-3.60026	0.000317902	0.00256424	CK
Zm00001eb311010	27.0862	-1.23587	0.406892	-3.03733	0.00238681	0.0129272	CK
Zm00001eb138920	256.054	-1.23403	0.22106	-5.58231	2.37343e-08	1.10068e-06	CK
Zm00001eb053220	628.866	-1.23173	0.307038	-4.01165	6.0297e-05	0.000670132	CK
Zm00001eb231280	280.964	-1.23165	0.2846	-4.32767	1.50692e-05	0.000216932	CK
Zm00001eb151300	317.827	-1.22935	0.212055	-5.79734	6.73767e-09	4.17969e-07	CK
Zm00001eb415590	18.764	-1.22768	0.463576	-2.64829	0.00809006	0.0339349	CK
Zm00001eb139540	496.299	-1.22759	0.294122	-4.17375	2.99624e-05	0.00037495	CK
Zm00001eb111610	39.8829	-1.22654	0.373153	-3.28697	0.0010127	0.00650338	CK
Zm00001eb158290	208.95	-1.22538	0.21508	-5.69734	1.2169e-08	6.4334e-07	CK
Zm00001eb107370	157.311	-1.22333	0.203275	-6.01811	1.7647e-09	1.41334e-07	CK
Zm00001eb371280	176.768	-1.22011	0.369746	-3.29985	0.000967373	0.00627112	CK
Zm00001eb385750	51.2407	-1.21903	0.345092	-3.53249	0.000411672	0.00315464	CK
Zm00001eb236760	476.544	-1.21876	0.273439	-4.45715	8.30553e-06	0.000133336	CK
Zm00001eb249450	65.656	-1.21807	0.339857	-3.58406	0.000338292	0.00269618	CK
Zm00001eb344730	44.6813	-1.21785	0.425326	-2.86333	0.00419218	0.0200782	CK
Zm00001eb135830	163.556	-1.21681	0.318428	-3.8213	0.000132749	0.00126356	CK
Zm00001eb243040	2550.71	-1.21389	0.211445	-5.74095	9.41453e-09	5.33176e-07	CK
Zm00001eb101550	22.8805	-1.21294	0.486935	-2.49096	0.0127397	0.0484231	CK
Zm00001eb013360	218.335	-1.21158	0.217458	-5.57157	2.52458e-08	1.15293e-06	CK
Zm00001eb222660	54.7243	-1.21099	0.411519	-2.94273	0.00325333	0.0164189	CK
Zm00001eb225670	492.505	-1.21014	0.2276	-5.31697	1.05511e-07	3.7998e-06	CK
Zm00001eb285470	17.6521	-1.20727	0.478755	-2.5217	0.011679	0.0452407	CK
Zm00001eb272480	67.7608	-1.207	0.329871	-3.65899	0.000253206	0.00214476	CK
Zm00001eb171120	53.3714	-1.20623	0.334141	-3.60993	0.000306276	0.00249564	CK
Zm00001eb215900	84.5048	-1.206	0.390153	-3.09109	0.00199426	0.0112143	CK
Zm00001eb404880	355.445	-1.20576	0.269676	-4.47115	7.77994e-06	0.000125417	CK
Zm00001eb351260	150.282	-1.20561	0.313291	-3.84822	0.00011898	0.00115295	CK
Zm00001eb040350	124.548	-1.20319	0.372155	-3.23303	0.00122485	0.00756988	CK
Zm00001eb315650	349.136	-1.20238	0.311071	-3.86527	0.000110964	0.00108667	CK
Zm00001eb294220	20.9516	-1.19658	0.470447	-2.54349	0.010975	0.0430495	CK
Zm00001eb371300	32.5164	-1.19291	0.416623	-2.86329	0.00419262	0.0200782	CK
Zm00001eb201130	1045.52	-1.19008	0.182038	-6.53756	6.25305e-11	1.18272e-08	CK
Zm00001eb418730	46.8485	-1.19007	0.346539	-3.43416	0.000594393	0.00424138	CK
Zm00001eb124100	60.681	-1.18522	0.383853	-3.08771	0.00201707	0.0113099	CK
Zm00001eb035550	79.1219	-1.18373	0.361845	-3.27138	0.00107026	0.00679445	CK
Zm00001eb407150	961.358	-1.18296	0.24037	-4.92142	8.59205e-07	2.10045e-05	CK
Zm00001eb021420	89.2108	-1.18168	0.246304	-4.79763	1.60557e-06	3.46699e-05	CK
Zm00001eb212980	29.0211	-1.18114	0.405825	-2.91046	0.00360895	0.0178239	CK
Zm00001eb250680	24.9807	-1.17984	0.470222	-2.50911	0.0121035	0.0465573	CK
Zm00001eb280310	27.0472	-1.17906	0.31386	-3.75665	0.0001722	0.00156947	CK
Zm00001eb044900	131.813	-1.17543	0.325223	-3.61422	0.000301254	0.00246516	CK
Zm00001eb133930	442.072	-1.17449	0.22736	-5.16575	2.39473e-07	7.54778e-06	CK
Zm00001eb291480	136.725	-1.17261	0.196106	-5.9795	2.23823e-09	1.67638e-07	CK
Zm00001eb286910	39.8348	-1.16644	0.406222	-2.87143	0.00408615	0.0196916	CK
Zm00001eb416330	61.8426	-1.16602	0.317434	-3.67325	0.000239488	0.00204795	CK
Zm00001eb329050	456.455	-1.16553	0.215221	-5.4155	6.11164e-08	2.40698e-06	CK
Zm00001eb165430	118.666	-1.16479	0.340647	-3.41933	0.000627747	0.00442494	CK
Zm00001eb071280	78.7238	-1.16459	0.324745	-3.58617	0.000335572	0.00267958	CK
Zm00001eb265260	205.578	-1.16321	0.228092	-5.09971	3.40176e-07	1.00434e-05	CK
Zm00001eb394430	147.896	-1.16124	0.452691	-2.56519	0.010312	0.0410773	CK
Zm00001eb023600	1014.83	-1.15767	0.211245	-5.48024	4.2476e-08	1.79117e-06	CK
Zm00001eb195030	719.068	-1.15611	0.185392	-6.23604	4.48796e-10	4.699e-08	CK
Zm00001eb338710	100.358	-1.15527	0.451869	-2.55665	0.0105685	0.0418527	CK
Zm00001eb042320	31.8802	-1.15052	0.390559	-2.94583	0.00322084	0.0162944	CK
Zm00001eb169930	48.0362	-1.14946	0.313577	-3.66565	0.00024671	0.00210218	CK
Zm00001eb120160	27.7989	-1.14735	0.397708	-2.88491	0.00391525	0.0190301	CK
Zm00001eb104830	29.7462	-1.14694	0.406821	-2.81927	0.00481336	0.02244	CK
Zm00001eb434170	1450.24	-1.14574	0.170768	-6.70931	1.95541e-11	5.24635e-09	CK
Zm00001eb406570	466.857	-1.14524	0.287597	-3.98212	6.83036e-05	0.000739692	CK
Zm00001eb029410	51.5454	-1.14411	0.382375	-2.9921	0.00277065	0.0145019	CK
Zm00001eb419900	1737.26	-1.14262	0.204755	-5.58044	2.39917e-08	1.10743e-06	CK
Zm00001eb070980	381.756	-1.14196	0.204441	-5.58576	2.32682e-08	1.0902e-06	CK
Zm00001eb097930	205.904	-1.13991	0.243994	-4.67187	2.98467e-06	5.6743e-05	CK
Zm00001eb432840	166.034	-1.13759	0.341589	-3.33028	0.000867577	0.00574894	CK
Zm00001eb119280	1934.26	-1.13701	0.247328	-4.59719	4.28224e-06	7.6404e-05	CK
Zm00001eb227640	31.9374	-1.13576	0.44636	-2.54448	0.0109439	0.0429355	CK
Zm00001eb157310	1318.86	-1.13316	0.197167	-5.74721	9.07253e-09	5.16533e-07	CK
Zm00001eb023460	1452.93	-1.13308	0.22891	-4.94989	7.42541e-07	1.85757e-05	CK
Zm00001eb077180	55.7297	-1.13228	0.351611	-3.22028	0.00128068	0.00784263	CK
Zm00001eb131130	514.557	-1.12594	0.204365	-5.50944	3.59983e-08	1.5578e-06	CK
Zm00001eb365750	328.275	-1.12593	0.245293	-4.59016	4.42906e-06	7.83312e-05	CK
Zm00001eb058700	166.441	-1.12109	0.305161	-3.67378	0.000238991	0.00204452	CK
Zm00001eb264210	62.6201	-1.1195	0.284324	-3.93741	8.23642e-05	0.000855694	CK
Zm00001eb275420	50.4506	-1.11906	0.408359	-2.74037	0.00613692	0.0272323	CK
Zm00001eb025690	3013.45	-1.11877	0.240645	-4.64907	3.33437e-06	6.25056e-05	CK
Zm00001eb020710	354.743	-1.1174	0.23316	-4.79242	1.64782e-06	3.53688e-05	CK
Zm00001eb009150	77.5591	-1.1162	0.377948	-2.9533	0.00314392	0.0160174	CK
Zm00001eb140230	44.035	-1.1131	0.315269	-3.53064	0.000414551	0.00317103	CK
Zm00001eb220390	30.1811	-1.11269	0.388706	-2.86254	0.00420259	0.0201053	CK
Zm00001eb205270	2670.17	-1.1107	0.183473	-6.05377	1.41491e-09	1.17711e-07	CK
Zm00001eb271210	632.626	-1.11014	0.193368	-5.74106	9.40873e-09	5.33176e-07	CK
Zm00001eb358740	33.1678	-1.10908	0.405848	-2.73274	0.0062809	0.0277279	CK
Zm00001eb326450	40.1381	-1.10713	0.401126	-2.76004	0.00577935	0.025995	CK
Zm00001eb417240	2134.75	-1.10685	0.173901	-6.36485	1.95484e-10	2.52286e-08	CK
Zm00001eb280850	68.9988	-1.10522	0.233048	-4.74245	2.11147e-06	4.28361e-05	CK
Zm00001eb294040	133.527	-1.10394	0.222372	-4.96439	6.8917e-07	1.75057e-05	CK
Zm00001eb226490	253.549	-1.10369	0.383083	-2.88107	0.00396333	0.0192029	CK
Zm00001eb235280	39.2849	-1.10282	0.329669	-3.34524	0.000822108	0.00550225	CK
Zm00001eb259610	34.6904	-1.10096	0.421262	-2.61349	0.00896229	0.0368801	CK
Zm00001eb411910	36.2318	-1.10028	0.43538	-2.52718	0.0114983	0.0446456	CK
Zm00001eb047660	484.941	-1.09782	0.260753	-4.21019	2.55151e-05	0.000328331	CK
Zm00001eb015870	49.6095	-1.09657	0.440637	-2.4886	0.0128249	0.0486348	CK
Zm00001eb225960	41.89	-1.09585	0.342649	-3.19817	0.00138303	0.00834564	CK
Zm00001eb332100	63.5727	-1.09552	0.298043	-3.67571	0.000237192	0.00203237	CK
Zm00001eb302760	1005.56	-1.09503	0.207232	-5.2841	1.26325e-07	4.40169e-06	CK
Zm00001eb415190	71.7962	-1.09454	0.415858	-2.632	0.00848848	0.0352957	CK
Zm00001eb107360	111.122	-1.09412	0.241433	-4.53176	5.84942e-06	9.92506e-05	CK
Zm00001eb186300	2110.13	-1.09381	0.205365	-5.32616	1.00312e-07	3.65551e-06	CK
Zm00001eb033650	173.899	-1.09288	0.256431	-4.2619	2.02698e-05	0.000273114	CK
Zm00001eb378720	48.8966	-1.09265	0.349573	-3.12568	0.00177393	0.0102189	CK
Zm00001eb342840	361.62	-1.09243	0.179041	-6.10153	1.05057e-09	9.31798e-08	CK
Zm00001eb141040	111.471	-1.092	0.284872	-3.83328	0.000126443	0.00120944	CK
Zm00001eb213330	66.6827	-1.09152	0.286124	-3.81484	0.000136269	0.00129077	CK
Zm00001eb332160	1423.52	-1.09105	0.192846	-5.6576	1.53501e-08	7.789e-07	CK
Zm00001eb432500	1554.83	-1.08923	0.289094	-3.76774	0.000164731	0.00151556	CK
Zm00001eb416900	39.279	-1.08687	0.438806	-2.47689	0.0132534	0.0499509	CK
Zm00001eb167960	616.211	-1.08406	0.205393	-5.278	1.30599e-07	4.52125e-06	CK
Zm00001eb399340	17.4645	-1.08349	0.329385	-3.28943	0.0010039	0.00646108	CK
Zm00001eb227380	843.838	-1.08202	0.197666	-5.474	4.39988e-08	1.84451e-06	CK
Zm00001eb226030	88.435	-1.07954	0.258823	-4.17098	3.03298e-05	0.000378708	CK
Zm00001eb147950	68.1129	-1.07792	0.364412	-2.95796	0.00309685	0.0158339	CK
Zm00001eb161200	58.5094	-1.07329	0.381167	-2.81581	0.00486551	0.022634	CK
Zm00001eb260830	397.538	-1.07233	0.200062	-5.36001	8.32196e-08	3.15031e-06	CK
Zm00001eb203630	39.0929	-1.07207	0.426801	-2.51187	0.0120092	0.0462776	CK
Zm00001eb228370	121.918	-1.07188	0.36609	-2.92793	0.00341227	0.0170367	CK
Zm00001eb002090	658.178	-1.07169	0.202171	-5.3009	1.15235e-07	4.08828e-06	CK
Zm00001eb285460	232.086	-1.07083	0.356278	-3.00559	0.00265065	0.0140132	CK
Zm00001eb088410	1962.6	-1.06993	0.270464	-3.9559	7.62482e-05	0.000805409	CK
Zm00001eb286760	1575.12	-1.06952	0.318631	-3.35662	0.000789011	0.00530223	CK
Zm00001eb156920	85.454	-1.06774	0.230413	-4.63403	3.58616e-06	6.60715e-05	CK
Zm00001eb069000	119.857	-1.0675	0.257786	-4.14104	3.4574e-05	0.000422366	CK
Zm00001eb229530	168.534	-1.06667	0.243738	-4.37629	1.20719e-05	0.00018147	CK
Zm00001eb269660	21.9804	-1.0662	0.421563	-2.52916	0.0114335	0.04445	CK
Zm00001eb126880	69.0447	-1.06319	0.292785	-3.63129	0.000282013	0.00233892	CK
Zm00001eb233410	282.911	-1.06223	0.226895	-4.68161	2.84628e-06	5.46934e-05	CK
Zm00001eb417350	262.256	-1.06069	0.2622	-4.04534	5.22468e-05	0.000595552	CK
Zm00001eb090200	39.4958	-1.05869	0.414672	-2.55309	0.0106773	0.042167	CK
Zm00001eb275550	91.8312	-1.05728	0.313797	-3.36931	0.000753558	0.00512171	CK
Zm00001eb273530	164.834	-1.05637	0.240794	-4.38701	1.14919e-05	0.000174319	CK
Zm00001eb102220	67.5185	-1.0559	0.251699	-4.19512	2.72733e-05	0.000348034	CK
Zm00001eb150540	320.74	-1.05523	0.26234	-4.02239	5.76113e-05	0.000644046	CK
Zm00001eb389750	245.145	-1.05465	0.238977	-4.41321	1.0185e-05	0.0001575	CK
Zm00001eb144520	176.779	-1.05446	0.244437	-4.31383	1.60453e-05	0.000227857	CK
Zm00001eb356840	241.663	-1.05411	0.181981	-5.79241	6.93829e-09	4.2454e-07	CK
Zm00001eb163860	107.446	-1.05308	0.392874	-2.68046	0.00735201	0.0314789	CK
Zm00001eb251170	112.349	-1.05289	0.275471	-3.82213	0.000132304	0.00126044	CK
Zm00001eb000230	184.044	-1.05241	0.18952	-5.55303	2.80754e-08	1.27133e-06	CK
Zm00001eb125900	327.611	-1.05089	0.265646	-3.95599	7.62193e-05	0.000805409	CK
Zm00001eb260850	58.4939	-1.04987	0.245956	-4.26855	1.96749e-05	0.000266437	CK
Zm00001eb065870	42.7398	-1.04982	0.372037	-2.82182	0.00477527	0.0222964	CK
Zm00001eb045960	207.945	-1.04918	0.269202	-3.89736	9.72472e-05	0.000976293	CK
Zm00001eb350670	90.1504	-1.04784	0.235775	-4.44421	8.82136e-06	0.000140046	CK
Zm00001eb418340	301.676	-1.04755	0.347223	-3.01693	0.00255347	0.0136236	CK
Zm00001eb266360	282.874	-1.04559	0.242606	-4.3098	1.634e-05	0.000231041	CK
Zm00001eb073630	98.4818	-1.04511	0.256814	-4.06953	4.71076e-05	0.000547437	CK
Zm00001eb140620	172.155	-1.04374	0.303812	-3.43549	0.000591482	0.00422609	CK
Zm00001eb429750	16176.4	-1.04189	0.214243	-4.86313	1.15542e-06	2.68108e-05	CK
Zm00001eb297540	262.757	-1.04137	0.256816	-4.05493	5.01491e-05	0.000575491	CK
Zm00001eb280200	107.646	-1.03969	0.284512	-3.65428	0.000257904	0.00217511	CK
Zm00001eb236120	81.4187	-1.03735	0.270594	-3.83359	0.000126286	0.00120848	CK
Zm00001eb190950	10019.9	-1.03718	0.212288	-4.88573	1.03046e-06	2.42785e-05	CK
Zm00001eb317430	967.243	-1.03707	0.167765	-6.18167	6.34284e-10	6.3029e-08	CK
Zm00001eb265650	975.011	-1.03671	0.150853	-6.87233	6.31596e-12	2.36101e-09	CK
Zm00001eb130620	275.08	-1.03655	0.241922	-4.28465	1.83028e-05	0.000252313	CK
Zm00001eb124800	297.114	-1.03637	0.358427	-2.89145	0.00383465	0.0187019	CK
Zm00001eb103200	56.8836	-1.03637	0.286323	-3.61957	0.000295092	0.00242676	CK
Zm00001eb334560	1054.49	-1.0354	0.201279	-5.1441	2.68804e-07	8.30933e-06	CK
Zm00001eb100710	158.619	-1.03424	0.354528	-2.91725	0.00353137	0.0175188	CK
Zm00001eb144440	20.4469	-1.03394	0.375103	-2.75643	0.00584365	0.0262073	CK
Zm00001eb257670	1170.59	-1.0331	0.164038	-6.29797	3.01566e-10	3.42477e-08	CK
Zm00001eb300760	73.4437	-1.03256	0.346033	-2.984	0.0028451	0.0148257	CK
Zm00001eb248500	62.9542	-1.03236	0.391471	-2.63714	0.00836091	0.0349073	CK
Zm00001eb152830	31.1339	-1.03204	0.354292	-2.91298	0.00357999	0.0177093	CK
Zm00001eb366490	26.4225	-1.03158	0.392786	-2.62631	0.00863152	0.0357451	CK
Zm00001eb324900	503.251	-1.03021	0.194857	-5.287	1.24338e-07	4.36845e-06	CK
Zm00001eb086310	2087.27	-1.02937	0.205683	-5.00464	5.59679e-07	1.49229e-05	CK
Zm00001eb193280	16.3653	-1.02893	0.399437	-2.57596	0.00999629	0.0401296	CK
Zm00001eb323310	97.7056	-1.028	0.277376	-3.70615	0.000210433	0.00184885	CK
Zm00001eb067570	63.8924	-1.02763	0.33471	-3.07021	0.00213911	0.0118789	CK
Zm00001eb394690	35.5508	-1.02749	0.330046	-3.11318	0.00185083	0.0105599	CK
Zm00001eb246230	34.1709	-1.02637	0.329226	-3.11753	0.00182373	0.0104469	CK
Zm00001eb292310	279.791	-1.02457	0.19194	-5.338	9.39792e-08	3.48389e-06	CK
Zm00001eb030010	204.923	-1.02431	0.204551	-5.00759	5.51158e-07	1.47323e-05	CK
Zm00001eb372820	292.088	-1.02418	0.322564	-3.17511	0.00149779	0.00890787	CK
Zm00001eb272400	208.852	-1.02265	0.234701	-4.35726	1.31702e-05	0.000194152	CK
Zm00001eb263370	43.0202	-1.02226	0.225484	-4.53362	5.79804e-06	9.86126e-05	CK
Zm00001eb120610	30.0856	-1.02151	0.38766	-2.63506	0.00841213	0.0350551	CK
Zm00001eb212930	43.138	-1.02092	0.345906	-2.95144	0.00316294	0.0160875	CK
Zm00001eb065360	60.8247	-1.0208	0.309842	-3.29457	0.000985711	0.00636119	CK
Zm00001eb287060	67.7239	-1.02067	0.338801	-3.01259	0.0025903	0.0137756	CK
Zm00001eb168270	204.186	-1.02063	0.237106	-4.30452	1.67348e-05	0.000234616	CK
Zm00001eb082100	33.6499	-1.01802	0.354651	-2.87047	0.00409861	0.0197336	CK
Zm00001eb282510	577.786	-1.01685	0.191424	-5.31202	1.08415e-07	3.87836e-06	CK
Zm00001eb382290	103.548	-1.01657	0.402923	-2.52298	0.0116366	0.0450925	CK
Zm00001eb126650	173.303	-1.01614	0.179199	-5.67047	1.42404e-08	7.32988e-07	CK
Zm00001eb131590	1349.2	-1.01604	0.165331	-6.1455	7.97142e-10	7.60438e-08	CK
Zm00001eb064210	68.7046	-1.01559	0.309094	-3.2857	0.00101728	0.0065276	CK
Zm00001eb362260	56.7858	-1.01485	0.39536	-2.5669	0.0102613	0.0409461	CK
Zm00001eb387520	146.297	-1.01458	0.225277	-4.5037	6.67806e-06	0.000110771	CK
Zm00001eb412350	38.9159	-1.01066	0.370322	-2.72912	0.00635027	0.0279993	CK
Zm00001eb407090	25.199	-1.01054	0.39756	-2.54186	0.0110266	0.0431966	CK
Zm00001eb419390	282.566	-1.01042	0.202683	-4.98521	6.18945e-07	1.61508e-05	CK
Zm00001eb156820	59.8915	-1.01028	0.356905	-2.83068	0.00464487	0.0218395	CK
Zm00001eb143420	63.9789	-1.01025	0.263401	-3.83542	0.00012535	0.00120165	CK
Zm00001eb178180	929.168	-1.0102	0.228233	-4.42617	9.59208e-06	0.000149593	CK
Zm00001eb167340	420.714	-1.00798	0.310942	-3.24171	0.00118817	0.00738355	CK
Zm00001eb187620	96.7971	-1.00747	0.308924	-3.26123	0.00110929	0.00699052	CK
Zm00001eb380810	35.6092	-1.00734	0.363273	-2.77297	0.00555469	0.0251478	CK
Zm00001eb040070	68.5981	-1.00699	0.36798	-2.73654	0.00620891	0.027478	CK
Zm00001eb065710	339.91	-1.00665	0.251826	-3.99741	6.40385e-05	0.000702004	CK
Zm00001eb247710	787.657	-1.00499	0.167031	-6.01675	1.77954e-09	1.41467e-07	CK
Zm00001eb380860	139.664	-1.00452	0.365861	-2.74563	0.00603951	0.0269302	CK
Zm00001eb116230	163.312	-1.0033	0.325637	-3.08104	0.00206279	0.0115151	CK
Zm00001eb284110	82.9782	-1.00165	0.287474	-3.48431	0.000493407	0.00363559	CK
Zm00001eb169420	735.925	-1.00162	0.17589	-5.69458	1.23674e-08	6.52221e-07	CK
Zm00001eb206510	331.397	-1.00162	0.218134	-4.59176	4.3953e-06	7.79675e-05	CK
Zm00001eb276150	537.694	-1.00098	0.267737	-3.73865	0.000185008	0.00166709	CK
Zm00001eb028780	192.26	-1.00061	0.221576	-4.51588	6.30554e-06	0.000105819	CK
Zm00001eb383780	236.287	-0.99911	0.169944	-5.87907	4.12589e-09	2.77611e-07	CK
Zm00001eb344570	181.758	-0.99855	0.225249	-4.4331	9.28887e-06	0.000145849	CK
Zm00001eb336480	83.051	-0.99793	0.376311	-2.65187	0.00800465	0.0336938	CK
Zm00001eb323770	102.897	-0.99761	0.250891	-3.97627	7.00043e-05	0.000754304	CK
Zm00001eb066960	1505.15	-0.996812	0.271843	-3.66686	0.000245548	0.00209394	CK
Zm00001eb073680	140.846	-0.996043	0.227468	-4.37883	1.19318e-05	0.000179975	CK
Zm00001eb401120	275.981	-0.995085	0.221474	-4.49301	7.02244e-06	0.000115513	CK
Zm00001eb033210	78.1639	-0.994882	0.220652	-4.50883	6.51853e-06	0.00010846	CK
Zm00001eb166870	55.3834	-0.994745	0.373319	-2.6646	0.00770809	0.0326786	CK
Zm00001eb291460	618.119	-0.994586	0.144407	-6.88738	5.68298e-12	2.34213e-09	CK
Zm00001eb198120	173.491	-0.994352	0.196757	-5.05371	4.33309e-07	1.21259e-05	CK
Zm00001eb284380	34.1572	-0.993945	0.393759	-2.52425	0.0115947	0.0449545	CK
Zm00001eb289280	122.713	-0.993373	0.291902	-3.40311	0.000666243	0.00463842	CK
Zm00001eb020170	1377.42	-0.993279	0.177131	-5.60759	2.05168e-08	9.85173e-07	CK
Zm00001eb287610	1268.09	-0.993217	0.180449	-5.50414	3.70969e-08	1.59889e-06	CK
Zm00001eb318970	48.9642	-0.992523	0.333905	-2.97247	0.00295413	0.0152532	CK
Zm00001eb253960	26.4078	-0.992209	0.380462	-2.6079	0.00910986	0.037337	CK
Zm00001eb010790	217.724	-0.991736	0.237964	-4.16759	3.07832e-05	0.000382676	CK
Zm00001eb290160	68.4711	-0.990608	0.280595	-3.53038	0.000414966	0.00317308	CK
Zm00001eb046520	229.533	-0.990151	0.25002	-3.9603	7.48568e-05	0.000795016	CK
Zm00001eb011810	340.771	-0.989386	0.279622	-3.53829	0.000402721	0.00310377	CK
Zm00001eb279820	32.95	-0.988055	0.397344	-2.48665	0.0128954	0.048833	CK
Zm00001eb124520	100.085	-0.986685	0.284557	-3.46744	0.000525434	0.00383539	CK
Zm00001eb280920	141.389	-0.98658	0.3084	-3.19903	0.00137892	0.00832547	CK
Zm00001eb200350	60.8871	-0.985955	0.379604	-2.59733	0.00939522	0.0382437	CK
Zm00001eb236880	102.892	-0.985852	0.287264	-3.43186	0.000599451	0.0042647	CK
Zm00001eb384970	166.044	-0.985626	0.238934	-4.1251	3.70576e-05	0.000446856	CK
Zm00001eb255480	140.034	-0.983914	0.244402	-4.0258	5.67825e-05	0.000637437	CK
Zm00001eb373910	51.7033	-0.98274	0.301301	-3.26165	0.00110765	0.00698227	CK
Zm00001eb020340	9323.28	-0.982498	0.290605	-3.38088	0.000722551	0.00495648	CK
Zm00001eb147710	88.0271	-0.982057	0.282859	-3.4719	0.00051679	0.00378063	CK
Zm00001eb322260	133.984	-0.982027	0.286067	-3.43286	0.000597248	0.00425468	CK
Zm00001eb249940	7904.2	-0.981992	0.17185	-5.71425	1.1019e-08	5.97253e-07	CK
Zm00001eb281180	338.196	-0.981637	0.311088	-3.1555	0.00160223	0.00941683	CK
Zm00001eb411100	1169.67	-0.980458	0.176074	-5.56845	2.57011e-08	1.17123e-06	CK
Zm00001eb422400	132.074	-0.980256	0.349569	-2.80418	0.00504445	0.0232498	CK
Zm00001eb137920	63.4832	-0.979968	0.256899	-3.81461	0.000136401	0.00129144	CK
Zm00001eb283450	10234.5	-0.977363	0.177508	-5.50603	3.67018e-08	1.58504e-06	CK
Zm00001eb360620	160.141	-0.976901	0.33425	-2.92266	0.0034705	0.0172913	CK
Zm00001eb399560	380.223	-0.975782	0.223133	-4.37309	1.22499e-05	0.000183484	CK
Zm00001eb023070	314.17	-0.975135	0.268517	-3.63156	0.000281708	0.0023373	CK
Zm00001eb400300	254.387	-0.974604	0.378734	-2.57332	0.0100727	0.0403434	CK
Zm00001eb225230	5841.91	-0.974316	0.158954	-6.12956	8.81207e-10	8.11769e-08	CK
Zm00001eb399140	46.3482	-0.973851	0.354939	-2.74371	0.00607486	0.0270296	CK
Zm00001eb131430	96.5666	-0.972127	0.343295	-2.83175	0.00462939	0.0217902	CK
Zm00001eb096680	6479.43	-0.970355	0.186066	-5.21512	1.83697e-07	6.00132e-06	CK
Zm00001eb291880	77.2685	-0.970193	0.315984	-3.07039	0.00213781	0.0118753	CK
Zm00001eb190430	95.3076	-0.970094	0.328804	-2.95037	0.00317395	0.0161359	CK
Zm00001eb159250	352.595	-0.969458	0.254711	-3.80611	0.00014117	0.00132898	CK
Zm00001eb014190	235.478	-0.968982	0.224942	-4.3077	1.6496e-05	0.000232282	CK
Zm00001eb119840	56.7355	-0.968568	0.3338	-2.90164	0.00371214	0.0182078	CK
Zm00001eb360400	307.648	-0.966927	0.220836	-4.37849	1.19502e-05	0.000180045	CK
Zm00001eb096370	99.1624	-0.966623	0.322005	-3.00189	0.00268307	0.0141358	CK
Zm00001eb013070	44.864	-0.965764	0.31788	-3.03814	0.0023804	0.0129022	CK
Zm00001eb252540	31.2109	-0.965258	0.387368	-2.49183	0.0127085	0.0483131	CK
Zm00001eb177640	559.242	-0.962374	0.157781	-6.09944	1.0644e-09	9.40178e-08	CK
Zm00001eb185470	278.773	-0.961294	0.28555	-3.36647	0.00076137	0.00515522	CK
Zm00001eb023280	140.684	-0.960873	0.222836	-4.31203	1.61764e-05	0.000229333	CK
Zm00001eb169710	204.681	-0.960787	0.227776	-4.21813	2.46333e-05	0.000319474	CK
Zm00001eb373120	1507.79	-0.95995	0.204322	-4.69821	2.62449e-06	5.11181e-05	CK
Zm00001eb315500	85.7166	-0.959218	0.257409	-3.72644	0.000194202	0.00173321	CK
Zm00001eb432200	449.602	-0.958977	0.138661	-6.91598	4.64647e-12	2.16808e-09	CK
Zm00001eb159820	712.24	-0.957592	0.150667	-6.35569	2.07489e-10	2.60883e-08	CK
Zm00001eb286320	62.7464	-0.955925	0.338471	-2.82424	0.00473924	0.0221757	CK
Zm00001eb238390	115.14	-0.955922	0.312751	-3.05649	0.00223943	0.0122719	CK
Zm00001eb158810	50.7372	-0.955383	0.319442	-2.99079	0.00278259	0.014553	CK
Zm00001eb228180	157.511	-0.954532	0.168858	-5.65287	1.57788e-08	7.96886e-07	CK
Zm00001eb379260	59.7585	-0.954206	0.260071	-3.66902	0.000243478	0.00207959	CK
Zm00001eb086200	129.803	-0.954132	0.301505	-3.16456	0.00155318	0.00918862	CK
Zm00001eb258520	174.636	-0.953957	0.293938	-3.24543	0.00117272	0.00731298	CK
Zm00001eb020730	46.214	-0.953218	0.349183	-2.72985	0.0063363	0.0279553	CK
Zm00001eb005190	425.549	-0.952422	0.149859	-6.35543	2.07841e-10	2.60883e-08	CK
Zm00001eb381990	84.4931	-0.951998	0.33535	-2.83882	0.00452809	0.0214171	CK
Zm00001eb003730	21997.4	-0.951752	0.175797	-5.41393	6.1656e-08	2.41935e-06	CK
Zm00001eb044150	365.04	-0.951301	0.229973	-4.13657	3.52533e-05	0.00042847	CK
Zm00001eb276250	97.3479	-0.950952	0.367368	-2.58855	0.00963804	0.0390396	CK
Zm00001eb094910	63.321	-0.950862	0.344953	-2.7565	0.00584239	0.0262073	CK
Zm00001eb233290	89.1446	-0.950742	0.247111	-3.84742	0.000119366	0.00115598	CK
Zm00001eb182130	507.398	-0.950572	0.212584	-4.47152	7.7666e-06	0.00012534	CK
Zm00001eb157260	43.9523	-0.948896	0.340039	-2.79055	0.00526191	0.0240865	CK
Zm00001eb066280	156.697	-0.948651	0.277022	-3.42447	0.000616009	0.00436082	CK
Zm00001eb154370	38.9653	-0.947686	0.32139	-2.94871	0.00319104	0.0161998	CK
Zm00001eb079310	95.71	-0.947216	0.29135	-3.25112	0.0011495	0.00719742	CK
Zm00001eb211360	59.0691	-0.945258	0.317421	-2.97793	0.00290199	0.0150419	CK
Zm00001eb420820	528.848	-0.944668	0.146326	-6.45589	1.07584e-10	1.66129e-08	CK
Zm00001eb399900	336.733	-0.944322	0.282564	-3.34198	0.000831845	0.00555529	CK
Zm00001eb077930	235.69	-0.942167	0.317379	-2.96859	0.00299171	0.0154139	CK
Zm00001eb008200	439.999	-0.940988	0.170297	-5.52557	3.28417e-08	1.45343e-06	CK
Zm00001eb016550	366.803	-0.940369	0.255324	-3.68305	0.000230462	0.00198483	CK
Zm00001eb103190	56.7676	-0.937973	0.348622	-2.69051	0.0071342	0.0306871	CK
Zm00001eb377440	112.315	-0.93752	0.292406	-3.20623	0.00134487	0.00816356	CK
Zm00001eb111860	60.0255	-0.936973	0.257596	-3.63737	0.000275433	0.00229588	CK
Zm00001eb326470	48.5248	-0.936162	0.286737	-3.26488	0.0010951	0.00691333	CK
Zm00001eb369090	67.6268	-0.93528	0.204578	-4.57176	4.83636e-06	8.41229e-05	CK
Zm00001eb139070	60.4412	-0.935213	0.272413	-3.43308	0.000596773	0.00425405	CK
Zm00001eb134130	124.667	-0.93377	0.190138	-4.91101	9.06062e-07	2.20246e-05	CK
Zm00001eb110400	418.634	-0.932918	0.212134	-4.39777	1.09368e-05	0.000167558	CK
Zm00001eb272230	313.334	-0.932327	0.205973	-4.52644	5.99845e-06	0.000101379	CK
Zm00001eb001390	863.412	-0.932108	0.198148	-4.70411	2.54972e-06	5.00249e-05	CK
Zm00001eb112000	192.164	-0.932069	0.222518	-4.18874	2.80503e-05	0.000356256	CK
Zm00001eb199980	61.6377	-0.93162	0.334521	-2.78493	0.00535387	0.0244241	CK
Zm00001eb424840	141.584	-0.931191	0.186573	-4.99102	6.00606e-07	1.57983e-05	CK
Zm00001eb396990	1349.44	-0.930199	0.299061	-3.1104	0.00186835	0.0106372	CK
Zm00001eb304530	387.692	-0.92881	0.234743	-3.95671	7.59882e-05	0.000804246	CK
Zm00001eb223550	137.425	-0.928486	0.320902	-2.89336	0.00381146	0.0185996	CK
Zm00001eb096490	270.482	-0.928179	0.222163	-4.17791	2.94198e-05	0.000369495	CK
Zm00001eb368000	71.6256	-0.92703	0.328767	-2.81971	0.00480664	0.0224136	CK
Zm00001eb164040	86.8929	-0.926691	0.271794	-3.40954	0.000650731	0.00455405	CK
Zm00001eb056390	788.578	-0.926544	0.128584	-7.20576	5.77216e-13	4.72378e-10	CK
Zm00001eb072650	451.743	-0.926035	0.145953	-6.34473	2.22815e-10	2.73286e-08	CK
Zm00001eb060520	754.952	-0.925432	0.198074	-4.67214	2.98077e-06	5.67191e-05	CK
Zm00001eb177920	381.438	-0.925274	0.154135	-6.00301	1.93694e-09	1.51981e-07	CK
Zm00001eb068390	566.023	-0.925181	0.168497	-5.49078	4.0016e-08	1.70756e-06	CK
Zm00001eb175890	267.505	-0.925028	0.259956	-3.5584	0.000373115	0.00291432	CK
Zm00001eb315770	179.91	-0.924397	0.236397	-3.91036	9.21603e-05	0.000935727	CK
Zm00001eb148680	37.7158	-0.924237	0.301911	-3.06129	0.00220385	0.0121229	CK
Zm00001eb300320	668.504	-0.923735	0.145847	-6.33359	2.39522e-10	2.88825e-08	CK
Zm00001eb060190	438.751	-0.923734	0.309838	-2.98135	0.00286983	0.0149252	CK
Zm00001eb033440	1076.45	-0.923186	0.157279	-5.86973	4.36518e-09	2.90075e-07	CK
Zm00001eb416170	174.933	-0.922517	0.258413	-3.56993	0.000357079	0.00281467	CK
Zm00001eb017620	609.457	-0.922044	0.210956	-4.37079	1.238e-05	0.000185045	CK
Zm00001eb150550	254.648	-0.921835	0.259915	-3.54668	0.000390116	0.00302618	CK
Zm00001eb029020	2012.45	-0.92165	0.176144	-5.23235	1.67367e-07	5.52673e-06	CK
Zm00001eb117370	108.515	-0.921103	0.263702	-3.49296	0.000477693	0.00354537	CK
Zm00001eb025880	285.678	-0.920531	0.194458	-4.73383	2.20323e-06	4.41964e-05	CK
Zm00001eb325680	114.513	-0.920064	0.315046	-2.92042	0.00349565	0.0173939	CK
Zm00001eb240200	219.278	-0.919849	0.250343	-3.67436	0.00023845	0.00204152	CK
Zm00001eb022980	340.8	-0.919555	0.334948	-2.74537	0.0060443	0.0269329	CK
Zm00001eb126270	856.214	-0.919017	0.200937	-4.57365	4.79303e-06	8.35045e-05	CK
Zm00001eb387160	142.37	-0.918971	0.255975	-3.59008	0.000330575	0.00265251	CK
Zm00001eb112150	816.553	-0.918809	0.188046	-4.88608	1.02862e-06	2.42618e-05	CK
Zm00001eb019460	405.293	-0.918633	0.14915	-6.15913	7.31466e-10	7.13645e-08	CK
Zm00001eb317090	1320.7	-0.918527	0.141734	-6.48065	9.13301e-11	1.49415e-08	CK
Zm00001eb082270	63.5518	-0.918115	0.258592	-3.55044	0.000384593	0.00299127	CK
Zm00001eb053630	2105.54	-0.917672	0.143808	-6.38121	1.75692e-10	2.34227e-08	CK
Zm00001eb141910	2359.7	-0.917158	0.194038	-4.72669	2.2821e-06	4.5481e-05	CK
Zm00001eb116990	1051.79	-0.917106	0.145224	-6.31512	2.69951e-10	3.11518e-08	CK
Zm00001eb279970	622.745	-0.917005	0.206678	-4.43688	9.12709e-06	0.00014381	CK
Zm00001eb067910	297.379	-0.915871	0.221123	-4.14191	3.44422e-05	0.000421235	CK
Zm00001eb309740	303.21	-0.91547	0.226181	-4.04752	5.17637e-05	0.000590673	CK
Zm00001eb349840	185.825	-0.91462	0.169943	-5.38192	7.36938e-08	2.81883e-06	CK
Zm00001eb297390	973.881	-0.914236	0.215379	-4.24477	2.18815e-05	0.000289024	CK
Zm00001eb311730	351.217	-0.913945	0.307908	-2.96824	0.00299511	0.0154239	CK
Zm00001eb056260	45.5013	-0.913243	0.300227	-3.04184	0.00235137	0.0127804	CK
Zm00001eb217080	267.242	-0.909913	0.282342	-3.22274	0.00126973	0.00779947	CK
Zm00001eb420650	177.325	-0.909465	0.221959	-4.09745	4.17725e-05	0.000495362	CK
Zm00001eb378090	530.305	-0.909249	0.185824	-4.89308	9.92722e-07	2.36753e-05	CK
Zm00001eb245520	83.8395	-0.907234	0.330945	-2.74134	0.00611888	0.0271804	CK
Zm00001eb046990	196.824	-0.907033	0.213901	-4.24043	2.23089e-05	0.000293766	CK
Zm00001eb213260	1165.7	-0.907027	0.158291	-5.73012	1.00357e-08	5.58048e-07	CK
Zm00001eb333300	912.373	-0.905852	0.27593	-3.2829	0.00102744	0.00657707	CK
Zm00001eb254050	1109.64	-0.905712	0.148536	-6.09759	1.07678e-09	9.46555e-08	CK
Zm00001eb030970	172.801	-0.904559	0.188669	-4.79442	1.63149e-06	3.51237e-05	CK
Zm00001eb075460	107.852	-0.904394	0.227904	-3.96831	7.2384e-05	0.000776825	CK
Zm00001eb342310	88.8548	-0.904278	0.265152	-3.41041	0.000648663	0.00454403	CK
Zm00001eb126670	146.312	-0.903736	0.170045	-5.3147	1.06834e-07	3.83458e-06	CK
Zm00001eb282360	300.759	-0.901922	0.149899	-6.01685	1.77849e-09	1.41467e-07	CK
Zm00001eb111280	167.202	-0.901738	0.153521	-5.8737	4.26172e-09	2.84079e-07	CK
Zm00001eb149670	41.3323	-0.901479	0.280857	-3.20974	0.00132854	0.0080965	CK
Zm00001eb023100	68.8653	-0.900201	0.251602	-3.57788	0.000346394	0.00274759	CK
Zm00001eb270190	44.8509	-0.899733	0.262351	-3.4295	0.000604686	0.00429625	CK
Zm00001eb181400	279.397	-0.898867	0.151434	-5.93571	2.92569e-09	2.11438e-07	CK
Zm00001eb417360	65.689	-0.89865	0.344586	-2.60791	0.0091096	0.037337	CK
Zm00001eb279290	458.851	-0.898072	0.155046	-5.79231	6.94248e-09	4.2454e-07	CK
Zm00001eb028020	223.801	-0.897577	0.275529	-3.25765	0.00112339	0.00705664	CK
Zm00001eb153340	87.0136	-0.897182	0.25397	-3.53263	0.000411451	0.00315407	CK
Zm00001eb284840	549.715	-0.897015	0.138611	-6.47146	9.70578e-11	1.52062e-08	CK
Zm00001eb119800	75.8956	-0.896423	0.298617	-3.00192	0.00268283	0.0141358	CK
Zm00001eb249210	3012.07	-0.896146	0.185411	-4.8333	1.34286e-06	3.0024e-05	CK
Zm00001eb048820	672.785	-0.896136	0.137511	-6.51683	7.18103e-11	1.25312e-08	CK
Zm00001eb075710	105.788	-0.895882	0.214211	-4.18223	2.88659e-05	0.000364029	CK
Zm00001eb244990	98.8753	-0.89561	0.359229	-2.49315	0.0126616	0.0481688	CK
Zm00001eb319710	1143.46	-0.893954	0.160006	-5.58699	2.31038e-08	1.08512e-06	CK
Zm00001eb255960	4728.02	-0.893939	0.145267	-6.15375	7.56709e-10	7.31621e-08	CK
Zm00001eb383490	205.204	-0.892815	0.163688	-5.45436	4.91506e-08	2.0019e-06	CK
Zm00001eb269960	492.39	-0.892453	0.238973	-3.73453	0.000188067	0.00169252	CK
Zm00001eb117010	568.876	-0.892052	0.237384	-3.75784	0.000171389	0.00156275	CK
Zm00001eb384950	76.3965	-0.891447	0.220015	-4.05175	5.08356e-05	0.000581939	CK
Zm00001eb107350	87.8909	-0.891254	0.32574	-2.73609	0.00621741	0.0275042	CK
Zm00001eb055880	1897.75	-0.890892	0.197924	-4.50118	6.75759e-06	0.000111917	CK
Zm00001eb406300	601.829	-0.890847	0.155646	-5.72355	1.0432e-08	5.73538e-07	CK
Zm00001eb419500	269.876	-0.890671	0.212351	-4.19433	2.73682e-05	0.000348831	CK
Zm00001eb062230	258.3	-0.889536	0.236681	-3.75837	0.000171023	0.00156073	CK
Zm00001eb036930	4796.48	-0.889527	0.161043	-5.52352	3.32271e-08	1.46746e-06	CK
Zm00001eb204360	330.504	-0.889463	0.140633	-6.32471	2.53707e-10	3.0086e-08	CK
Zm00001eb023520	63.0997	-0.887996	0.351359	-2.52732	0.0114938	0.0446441	CK
Zm00001eb150320	1445.39	-0.887869	0.11009	-8.06497	7.32534e-16	7.86155e-12	CK
Zm00001eb104680	682.073	-0.887836	0.149024	-5.95766	2.55877e-09	1.89384e-07	CK
Zm00001eb425800	111.492	-0.887535	0.248827	-3.56688	0.000361258	0.00283823	CK
Zm00001eb066570	26.1491	-0.886199	0.353818	-2.50467	0.0122565	0.0470109	CK
Zm00001eb172910	204.033	-0.8859	0.288591	-3.06974	0.00214244	0.0118856	CK
Zm00001eb130570	72.9717	-0.884852	0.290295	-3.04811	0.00230285	0.0125644	CK
Zm00001eb192490	778.983	-0.88318	0.212488	-4.15638	3.23324e-05	0.00039976	CK
Zm00001eb342370	230.143	-0.882642	0.232316	-3.79932	0.000145095	0.00136115	CK
Zm00001eb225240	212.711	-0.882133	0.169433	-5.20639	1.92545e-07	6.2301e-06	CK
Zm00001eb246640	57.8195	-0.881907	0.324202	-2.72024	0.00652343	0.028556	CK
Zm00001eb254570	138.488	-0.879921	0.177091	-4.96875	6.73875e-07	1.71986e-05	CK
Zm00001eb304610	133.005	-0.879726	0.311783	-2.82159	0.00477856	0.0223069	CK
Zm00001eb380130	377.293	-0.879395	0.251857	-3.49165	0.000480051	0.00355918	CK
Zm00001eb218600	258.373	-0.878661	0.196378	-4.47434	7.66483e-06	0.000124116	CK
Zm00001eb143230	143.363	-0.878583	0.259347	-3.38768	0.000704874	0.00485851	CK
Zm00001eb359230	80.5262	-0.878568	0.251104	-3.49882	0.000467322	0.00348406	CK
Zm00001eb304260	3106.37	-0.877642	0.176546	-4.97119	6.65434e-07	1.7044e-05	CK
Zm00001eb418060	1127.55	-0.877515	0.216438	-4.05435	5.02734e-05	0.000576117	CK
Zm00001eb393500	82.9927	-0.877209	0.289698	-3.02801	0.0024617	0.0132393	CK
Zm00001eb081330	51.2191	-0.8771	0.318169	-2.75671	0.00583867	0.0262023	CK
Zm00001eb298480	570.003	-0.876598	0.201455	-4.35133	1.35314e-05	0.000198658	CK
Zm00001eb135770	25.7365	-0.875011	0.346734	-2.52358	0.0116168	0.0450239	CK
Zm00001eb374260	239.875	-0.87471	0.217115	-4.02878	5.6067e-05	0.000631055	CK
Zm00001eb003170	934.01	-0.874508	0.263287	-3.3215	0.000895354	0.00588963	CK
Zm00001eb350180	192.258	-0.87166	0.342051	-2.54833	0.0108239	0.0425736	CK
Zm00001eb030110	113.265	-0.87135	0.262875	-3.31469	0.000917441	0.00600731	CK
Zm00001eb149310	47.4187	-0.870743	0.325935	-2.67152	0.00755084	0.0321378	CK
Zm00001eb393120	4479.42	-0.870294	0.133824	-6.50329	7.85832e-11	1.33866e-08	CK
Zm00001eb142720	609.532	-0.870037	0.139485	-6.23749	4.4465e-10	4.67842e-08	CK
Zm00001eb095030	648.565	-0.869735	0.174195	-4.99287	5.94876e-07	1.56668e-05	CK
Zm00001eb190910	467.174	-0.868545	0.148966	-5.83049	5.52652e-09	3.5622e-07	CK
Zm00001eb292010	2420.75	-0.868511	0.256605	-3.38462	0.000712772	0.00490037	CK
Zm00001eb325930	126.753	-0.867781	0.277658	-3.12536	0.0017759	0.0102248	CK
Zm00001eb188800	186.426	-0.867705	0.298796	-2.90401	0.00368421	0.0180873	CK
Zm00001eb427680	86.2703	-0.867087	0.23909	-3.62661	0.000287163	0.00237247	CK
Zm00001eb081120	352.475	-0.866449	0.210033	-4.1253	3.70259e-05	0.000446725	CK
Zm00001eb215310	1575.02	-0.866316	0.160363	-5.40223	6.5817e-08	2.55923e-06	CK
Zm00001eb074660	305.6	-0.866037	0.332169	-2.60722	0.00912804	0.0373973	CK
Zm00001eb166630	1370.8	-0.865174	0.171629	-5.04096	4.63205e-07	1.27957e-05	CK
Zm00001eb078340	376.666	-0.865093	0.244546	-3.53756	0.000403849	0.00310912	CK
Zm00001eb125390	209.869	-0.864903	0.240855	-3.59097	0.000329456	0.00264452	CK
Zm00001eb376570	3069.41	-0.864187	0.180216	-4.79528	1.6245e-06	3.50434e-05	CK
Zm00001eb249470	112.985	-0.86369	0.275269	-3.13762	0.00170324	0.0099074	CK
Zm00001eb361170	49.0928	-0.86288	0.33613	-2.5671	0.0102552	0.0409294	CK
Zm00001eb229630	210.016	-0.862646	0.208263	-4.1421	3.44136e-05	0.000421126	CK
Zm00001eb163950	321.155	-0.862477	0.125207	-6.88842	5.64147e-12	2.34213e-09	CK
Zm00001eb251210	288.165	-0.862028	0.158624	-5.43441	5.49777e-08	2.20157e-06	CK
Zm00001eb328440	422.773	-0.86103	0.199255	-4.32125	1.55146e-05	0.000222144	CK
Zm00001eb146860	101.041	-0.860617	0.249389	-3.45091	0.0005587	0.00402955	CK
Zm00001eb186570	2984.28	-0.860447	0.204092	-4.21597	2.48703e-05	0.000322041	CK
Zm00001eb355990	358.293	-0.860051	0.280293	-3.0684	0.00215207	0.0119236	CK
Zm00001eb385410	2329.88	-0.860024	0.145037	-5.9297	3.03489e-09	2.17147e-07	CK
Zm00001eb174000	195.392	-0.859251	0.217101	-3.95784	7.56311e-05	0.000801652	CK
Zm00001eb060130	1546.79	-0.857771	0.153912	-5.57312	2.50214e-08	1.14512e-06	CK
Zm00001eb148220	203.657	-0.856346	0.178762	-4.79042	1.66432e-06	3.56517e-05	CK
Zm00001eb305380	274.44	-0.855581	0.207689	-4.11952	3.79655e-05	0.000455501	CK
Zm00001eb172170	1082.41	-0.855082	0.181697	-4.70609	2.52513e-06	4.96331e-05	CK
Zm00001eb329580	100.451	-0.853278	0.293545	-2.9068	0.00365145	0.0179717	CK
Zm00001eb297170	556.951	-0.853057	0.143862	-5.92969	3.03504e-09	2.17147e-07	CK
Zm00001eb314780	72.8526	-0.852893	0.249027	-3.4249	0.000615025	0.00435529	CK
Zm00001eb284090	127.026	-0.852764	0.336002	-2.53797	0.0111496	0.0435753	CK
Zm00001eb028420	582.624	-0.85254	0.231322	-3.68551	0.000228246	0.00197098	CK
Zm00001eb000660	735.867	-0.852502	0.316716	-2.69169	0.00710911	0.0306406	CK
Zm00001eb013100	33.9197	-0.852043	0.333543	-2.55452	0.0106334	0.0420478	CK
Zm00001eb341250	204.931	-0.851854	0.175886	-4.84322	1.27755e-06	2.89566e-05	CK
Zm00001eb314510	332.018	-0.851553	0.297048	-2.86672	0.00414756	0.0199068	CK
Zm00001eb166550	148.961	-0.851334	0.332452	-2.56077	0.010444	0.0414439	CK
Zm00001eb073990	88.7608	-0.850901	0.308632	-2.757	0.00583335	0.0261885	CK
Zm00001eb124540	143.108	-0.850819	0.247887	-3.43229	0.000598508	0.00426223	CK
Zm00001eb231920	132.032	-0.850364	0.243162	-3.49711	0.000470321	0.00349791	CK
Zm00001eb249590	486.598	-0.850253	0.225921	-3.7635	0.000167549	0.00153465	CK
Zm00001eb111420	5291.01	-0.850064	0.252523	-3.36628	0.000761891	0.0051555	CK
Zm00001eb072700	295.628	-0.849918	0.218548	-3.88893	0.000100686	0.00100424	CK
Zm00001eb029720	55.49	-0.849616	0.328763	-2.58428	0.00975827	0.0394002	CK
Zm00001eb158770	88.0993	-0.849346	0.233519	-3.63715	0.000275669	0.00229607	CK
Zm00001eb015080	92.98	-0.849213	0.235434	-3.60701	0.00030974	0.00251543	CK
Zm00001eb224490	35.7304	-0.849159	0.29032	-2.92491	0.00344561	0.0171792	CK
Zm00001eb137340	1173.45	-0.848736	0.161935	-5.24121	1.59526e-07	5.30863e-06	CK
Zm00001eb075560	530.179	-0.848224	0.173116	-4.89974	9.5962e-07	2.31076e-05	CK
Zm00001eb414360	479.233	-0.847891	0.224231	-3.78133	0.000155996	0.00144635	CK
Zm00001eb000790	45.934	-0.847528	0.311225	-2.7232	0.00646533	0.0283486	CK
Zm00001eb323590	1970.97	-0.847117	0.128195	-6.60805	3.89416e-11	8.61693e-09	CK
Zm00001eb311400	129.704	-0.846782	0.210068	-4.03099	5.55425e-05	0.000626466	CK
Zm00001eb393270	71.0214	-0.846433	0.25909	-3.26695	0.00108714	0.00687722	CK
Zm00001eb008160	104.167	-0.845715	0.254022	-3.3293	0.000870631	0.00576089	CK
Zm00001eb425560	291.934	-0.845693	0.203851	-4.14857	3.34552e-05	0.000410802	CK
Zm00001eb040450	60.4533	-0.844263	0.30104	-2.80448	0.0050397	0.0232406	CK
Zm00001eb223540	44.9316	-0.843848	0.32096	-2.62914	0.00856023	0.0355144	CK
Zm00001eb107430	152.569	-0.843736	0.229794	-3.67171	0.000240929	0.00205946	CK
Zm00001eb136200	314.816	-0.843426	0.205566	-4.10294	4.07931e-05	0.000485088	CK
Zm00001eb321450	138.587	-0.842638	0.198652	-4.24178	2.21749e-05	0.00029236	CK
Zm00001eb052150	317.787	-0.84261	0.194346	-4.33561	1.45357e-05	0.000210522	CK
Zm00001eb037570	2655.55	-0.842169	0.160421	-5.24975	1.52302e-07	5.11877e-06	CK
Zm00001eb343410	56.9379	-0.841968	0.304746	-2.76285	0.00572989	0.0258158	CK
Zm00001eb226190	48.3335	-0.84149	0.333027	-2.52679	0.0115111	0.0446869	CK
Zm00001eb005460	190.272	-0.840946	0.233197	-3.60616	0.000310762	0.00252181	CK
Zm00001eb103460	87.2725	-0.840945	0.278952	-3.01466	0.00257267	0.0136954	CK
Zm00001eb003080	22.7852	-0.840942	0.333922	-2.51838	0.0117895	0.0455782	CK
Zm00001eb357580	133.668	-0.840933	0.250067	-3.36283	0.000771468	0.00521044	CK
Zm00001eb403790	129.663	-0.840823	0.234454	-3.58631	0.000335392	0.00267915	CK
Zm00001eb045490	301.737	-0.840721	0.169108	-4.9715	6.64368e-07	1.7037e-05	CK
Zm00001eb033120	32.7341	-0.840457	0.327771	-2.56415	0.0103427	0.0411486	CK
Zm00001eb013990	418.455	-0.838326	0.275198	-3.04627	0.00231699	0.0126159	CK
Zm00001eb011840	1419.6	-0.837346	0.200324	-4.17996	2.91555e-05	0.000366819	CK
Zm00001eb248300	210.262	-0.83685	0.164761	-5.07917	3.79094e-07	1.09809e-05	CK
Zm00001eb351380	1372.01	-0.836462	0.128254	-6.52192	6.94149e-11	1.23134e-08	CK
Zm00001eb076170	323.333	-0.836055	0.273136	-3.06094	0.00220641	0.0121251	CK
Zm00001eb157820	1156.64	-0.836033	0.278592	-3.00092	0.00269163	0.014167	CK
Zm00001eb168430	838.61	-0.835888	0.182285	-4.5856	4.52682e-06	7.96423e-05	CK
Zm00001eb232560	123.352	-0.835726	0.187584	-4.4552	8.38145e-06	0.000134454	CK
Zm00001eb050310	251.002	-0.835488	0.183469	-4.55385	5.26736e-06	9.04715e-05	CK
Zm00001eb046440	102.146	-0.835274	0.256723	-3.25361	0.0011395	0.0071411	CK
Zm00001eb317190	1018.17	-0.834645	0.145604	-5.73231	9.90709e-09	5.55211e-07	CK
Zm00001eb287890	839.602	-0.834168	0.128821	-6.4754	9.45596e-11	1.50343e-08	CK
Zm00001eb062390	69.0178	-0.833791	0.308867	-2.69951	0.00694407	0.0300499	CK
Zm00001eb373450	171.491	-0.833142	0.223292	-3.73117	0.000190593	0.00171023	CK
Zm00001eb172520	1060	-0.832999	0.14181	-5.87403	4.25335e-09	2.84079e-07	CK
Zm00001eb201150	173.156	-0.832735	0.214076	-3.88991	0.00010028	0.00100113	CK
Zm00001eb042220	901.721	-0.832375	0.154364	-5.3923	6.95617e-08	2.67576e-06	CK
Zm00001eb032690	58764.8	-0.831904	0.152409	-5.45837	4.8052e-08	1.97963e-06	CK
Zm00001eb358750	491.757	-0.831033	0.18542	-4.48189	7.39854e-06	0.000120487	CK
Zm00001eb311900	334.68	-0.830292	0.156342	-5.31076	1.09171e-07	3.89892e-06	CK
Zm00001eb047990	374.239	-0.829925	0.186374	-4.453	8.46784e-06	0.000135553	CK
Zm00001eb422410	1070.73	-0.829769	0.241489	-3.43606	0.000590242	0.00422017	CK
Zm00001eb294800	560.435	-0.829078	0.155913	-5.31756	1.05168e-07	3.79381e-06	CK
Zm00001eb186900	4525.17	-0.828186	0.148553	-5.575	2.47528e-08	1.13768e-06	CK
Zm00001eb126830	110.354	-0.827731	0.222995	-3.71188	0.000205725	0.00181391	CK
Zm00001eb283750	64.0396	-0.82767	0.285814	-2.89584	0.00378151	0.0184973	CK
Zm00001eb068410	321.457	-0.827289	0.164178	-5.03898	4.68021e-07	1.28625e-05	CK
Zm00001eb306380	15993.5	-0.827246	0.142123	-5.82065	5.86192e-09	3.74465e-07	CK
Zm00001eb428010	239.066	-0.826894	0.177796	-4.65081	3.30633e-06	6.20884e-05	CK
Zm00001eb102940	74.1046	-0.826871	0.284515	-2.90625	0.00365791	0.0179912	CK
Zm00001eb248190	76.9813	-0.826738	0.280438	-2.94802	0.00319817	0.0162244	CK
Zm00001eb042630	145.287	-0.826562	0.194449	-4.2508	2.13008e-05	0.000283096	CK
Zm00001eb166450	2154.61	-0.826209	0.149901	-5.51171	3.55371e-08	1.54407e-06	CK
Zm00001eb105610	188.298	-0.825576	0.208874	-3.9525	7.73387e-05	0.000813724	CK
Zm00001eb297810	539.774	-0.825483	0.17749	-4.65087	3.3053e-06	6.20884e-05	CK
Zm00001eb192670	65.3717	-0.825267	0.29003	-2.84546	0.00443479	0.0210454	CK
Zm00001eb380520	270.944	-0.824517	0.12445	-6.62528	3.46589e-11	8.35864e-09	CK
Zm00001eb166390	73.1176	-0.824402	0.278556	-2.95956	0.00308081	0.0157707	CK
Zm00001eb208230	694.387	-0.82355	0.132949	-6.19448	5.84783e-10	5.92065e-08	CK
Zm00001eb253090	487.879	-0.823347	0.125292	-6.5714	4.98438e-11	1.04137e-08	CK
Zm00001eb219830	47.231	-0.822376	0.31189	-2.63675	0.00837043	0.0349224	CK
Zm00001eb115170	107.573	-0.822067	0.232678	-3.53307	0.000410768	0.00315104	CK
Zm00001eb210430	181.567	-0.821579	0.201524	-4.07683	4.56529e-05	0.000533711	CK
Zm00001eb189830	179.121	-0.82147	0.199985	-4.10765	3.99701e-05	0.000476622	CK
Zm00001eb061920	872.293	-0.821407	0.195643	-4.1985	2.68689e-05	0.000343078	CK
Zm00001eb163980	990.046	-0.821063	0.12424	-6.60868	3.87755e-11	8.61693e-09	CK
Zm00001eb296010	77.7745	-0.820999	0.322426	-2.54632	0.0108866	0.0427732	CK
Zm00001eb083140	1485.8	-0.820986	0.236968	-3.46454	0.00053114	0.00386716	CK
Zm00001eb408750	82.1009	-0.81995	0.299039	-2.74195	0.00610755	0.0271509	CK
Zm00001eb237240	85.8499	-0.819947	0.276421	-2.9663	0.0030141	0.0154994	CK
Zm00001eb398080	286.139	-0.819922	0.149124	-5.49825	3.83569e-08	1.64658e-06	CK
Zm00001eb078760	132.41	-0.819801	0.218466	-3.75253	0.000175056	0.00159054	CK
Zm00001eb369750	790.114	-0.819149	0.125247	-6.54026	6.1414e-11	1.18271e-08	CK
Zm00001eb146720	2353.3	-0.819034	0.12957	-6.32116	2.59603e-10	3.03061e-08	CK
Zm00001eb078320	285.853	-0.817926	0.245676	-3.32929	0.000870682	0.00576089	CK
Zm00001eb011610	167.208	-0.817354	0.152376	-5.36405	8.13783e-08	3.08605e-06	CK
Zm00001eb305680	370.296	-0.816773	0.188144	-4.34122	1.41692e-05	0.000206188	CK
Zm00001eb144960	28569.8	-0.81635	0.265489	-3.07489	0.00210581	0.0117309	CK
Zm00001eb129030	253.276	-0.815893	0.197931	-4.12211	3.75419e-05	0.000451935	CK
Zm00001eb300640	616.213	-0.815409	0.309394	-2.6355	0.00840124	0.0350348	CK
Zm00001eb049120	160.186	-0.815362	0.222874	-3.65839	0.000253801	0.00214726	CK
Zm00001eb164170	121.076	-0.815279	0.215802	-3.77791	0.000158151	0.00146191	CK
Zm00001eb352710	1033.88	-0.815224	0.29048	-2.80647	0.00500872	0.0231531	CK
Zm00001eb265200	110.207	-0.81449	0.254021	-3.20639	0.00134413	0.00816134	CK
Zm00001eb008170	1606.1	-0.813778	0.234052	-3.47691	0.000507237	0.00372089	CK
Zm00001eb253760	274.354	-0.81377	0.161858	-5.02767	4.96479e-07	1.35272e-05	CK
Zm00001eb359580	34.8877	-0.813601	0.293966	-2.76767	0.00564585	0.025496	CK
Zm00001eb249600	644.495	-0.813382	0.201535	-4.03592	5.43876e-05	0.000616029	CK
Zm00001eb306140	108.154	-0.813324	0.236698	-3.43612	0.000590099	0.00422017	CK
Zm00001eb020680	1483.37	-0.812802	0.188692	-4.30756	1.65062e-05	0.000232282	CK
Zm00001eb249500	18610.8	-0.812679	0.182005	-4.46514	8.00155e-06	0.000128841	CK
Zm00001eb149000	510.453	-0.811675	0.170232	-4.76805	1.86016e-06	3.87193e-05	CK
Zm00001eb247660	80.1212	-0.81166	0.293796	-2.76267	0.00573308	0.0258247	CK
Zm00001eb323530	161.82	-0.811453	0.270815	-2.99633	0.00273248	0.0143364	CK
Zm00001eb428170	189.272	-0.81133	0.196397	-4.13107	3.61085e-05	0.000437377	CK
Zm00001eb083390	740.731	-0.810823	0.194988	-4.15833	3.20587e-05	0.000397062	CK
Zm00001eb136990	295.68	-0.809557	0.231801	-3.49246	0.000478589	0.00355079	CK
Zm00001eb026860	304.001	-0.809269	0.168591	-4.80019	1.58516e-06	3.43329e-05	CK
Zm00001eb216870	954.685	-0.809193	0.24033	-3.36701	0.000759887	0.00514681	CK
Zm00001eb369110	1026.65	-0.809074	0.236725	-3.41778	0.000631334	0.00444439	CK
Zm00001eb002870	153.193	-0.80891	0.247697	-3.26572	0.00109185	0.00689887	CK
Zm00001eb021090	2465.72	-0.808788	0.23203	-3.48571	0.000490829	0.00362531	CK
Zm00001eb230300	509.093	-0.80855	0.133747	-6.04538	1.49054e-09	1.2305e-07	CK
Zm00001eb239670	73.9872	-0.808172	0.261541	-3.09004	0.0020013	0.0112421	CK
Zm00001eb365590	59.907	-0.807581	0.281567	-2.86816	0.00412862	0.0198692	CK
Zm00001eb129760	549.912	-0.807523	0.216104	-3.73673	0.000186426	0.00167846	CK
Zm00001eb379090	1344.84	-0.807508	0.115237	-7.00735	2.4288e-12	1.37189e-09	CK
Zm00001eb134000	76.3223	-0.807349	0.286421	-2.81875	0.00482116	0.0224667	CK
Zm00001eb126230	164.085	-0.807196	0.211985	-3.80779	0.000140213	0.00132112	CK
Zm00001eb368100	165.6	-0.807088	0.169754	-4.75446	1.98982e-06	4.06758e-05	CK
Zm00001eb009730	179.628	-0.806283	0.2774	-2.90658	0.00365409	0.0179765	CK
Zm00001eb385300	117.722	-0.806056	0.1942	-4.15065	3.31536e-05	0.000407332	CK
Zm00001eb011880	110.854	-0.805357	0.174609	-4.61236	3.98123e-06	7.18697e-05	CK
Zm00001eb165550	2222.84	-0.805327	0.207236	-3.88603	0.000101896	0.00101348	CK
Zm00001eb234600	752.958	-0.805275	0.12319	-6.53688	6.28169e-11	1.18272e-08	CK
Zm00001eb429260	126.085	-0.805111	0.282236	-2.85261	0.00433612	0.0206594	CK
Zm00001eb006180	1218.47	-0.804882	0.206627	-3.89533	9.80639e-05	0.000983112	CK
Zm00001eb426350	194.022	-0.804628	0.286011	-2.81328	0.00490391	0.0227682	CK
Zm00001eb068400	3515.73	-0.804392	0.13438	-5.98596	2.15123e-09	1.64105e-07	CK
Zm00001eb279310	37.6212	-0.804179	0.267062	-3.01121	0.00260208	0.0138142	CK
Zm00001eb041120	483.628	-0.804033	0.168639	-4.76777	1.86275e-06	3.87193e-05	CK
Zm00001eb077840	1661.48	-0.803472	0.108677	-7.39323	1.433e-13	1.85231e-10	CK
Zm00001eb297100	162.298	-0.80343	0.228914	-3.50974	0.000448537	0.00337685	CK
Zm00001eb104730	251.067	-0.80337	0.269347	-2.98266	0.00285759	0.01488	CK
Zm00001eb040180	366.503	-0.802451	0.19329	-4.15153	3.30255e-05	0.000405991	CK
Zm00001eb178010	1451.27	-0.802129	0.126784	-6.32675	2.50384e-10	2.98569e-08	CK
Zm00001eb323110	3452.68	-0.802103	0.132396	-6.05836	1.3752e-09	1.15596e-07	CK
Zm00001eb116010	12588.7	-0.800646	0.238208	-3.36112	0.000776275	0.00524126	CK
Zm00001eb127180	221.889	-0.800205	0.207481	-3.85675	0.000114903	0.00111748	CK
Zm00001eb325780	148.327	-0.799724	0.1911	-4.18485	2.85358e-05	0.000360927	CK
Zm00001eb073740	155.967	-0.799509	0.273263	-2.92578	0.0034359	0.0171428	CK
Zm00001eb228350	362.435	-0.799211	0.26865	-2.97492	0.00293069	0.0151503	CK
Zm00001eb175470	437.951	-0.798828	0.121914	-6.55241	5.66173e-11	1.11489e-08	CK
Zm00001eb165580	1109.36	-0.798739	0.265182	-3.01204	0.00259501	0.0137904	CK
Zm00001eb248200	94.6467	-0.7987	0.264302	-3.02193	0.00251171	0.0134509	CK
Zm00001eb143020	714.376	-0.798088	0.114459	-6.97268	3.10951e-12	1.62787e-09	CK
Zm00001eb103900	647.112	-0.797947	0.149036	-5.35407	8.59991e-08	3.22144e-06	CK
Zm00001eb432170	4323.92	-0.79784	0.130541	-6.1118	9.85124e-10	8.92182e-08	CK
Zm00001eb357780	93.6794	-0.797175	0.299425	-2.66236	0.00775959	0.0328505	CK
Zm00001eb348300	90.5257	-0.797153	0.310701	-2.56566	0.010298	0.0410483	CK
Zm00001eb177060	63.3601	-0.79703	0.249373	-3.19613	0.00139284	0.00840008	CK
Zm00001eb242920	180.982	-0.796952	0.202209	-3.94123	8.10661e-05	0.000845483	CK
Zm00001eb077130	12167.7	-0.796538	0.17108	-4.65594	3.22499e-06	6.08271e-05	CK
Zm00001eb241920	1439.16	-0.795807	0.226449	-3.51428	0.00044094	0.00333134	CK
Zm00001eb189150	397.261	-0.795666	0.175014	-4.54629	5.46004e-06	9.33075e-05	CK
Zm00001eb014110	86.9545	-0.795581	0.276267	-2.87975	0.00397986	0.0192613	CK
Zm00001eb279070	770.093	-0.795252	0.174184	-4.56559	4.9808e-06	8.61465e-05	CK
Zm00001eb433800	242.041	-0.795048	0.192894	-4.12167	3.76131e-05	0.000452538	CK
Zm00001eb311610	49.3778	-0.795031	0.318216	-2.4984	0.0124757	0.0476812	CK
Zm00001eb412910	104.674	-0.794662	0.24821	-3.20157	0.00136682	0.00827803	CK
Zm00001eb186170	152.737	-0.793529	0.18318	-4.33196	1.4779e-05	0.000213327	CK
Zm00001eb272240	308.226	-0.793171	0.125981	-6.29598	3.05468e-10	3.45082e-08	CK
Zm00001eb386320	226.488	-0.793072	0.175591	-4.51659	6.28443e-06	0.00010563	CK
Zm00001eb269470	290.418	-0.793047	0.215207	-3.68504	0.000228667	0.00197228	CK
Zm00001eb116160	3927.68	-0.792149	0.2112	-3.75071	0.000176337	0.00159768	CK
Zm00001eb064420	315.742	-0.792139	0.213996	-3.70165	0.000214202	0.00187735	CK
Zm00001eb352930	453.962	-0.791962	0.241999	-3.27258	0.00106572	0.00677367	CK
Zm00001eb425960	164.279	-0.791569	0.2162	-3.66128	0.000250954	0.00213157	CK
Zm00001eb074270	256.484	-0.791287	0.271063	-2.9192	0.00350927	0.0174399	CK
Zm00001eb144680	411.509	-0.790913	0.140355	-5.63508	1.74982e-08	8.67393e-07	CK
Zm00001eb256320	533.411	-0.790825	0.255226	-3.09853	0.0019448	0.0109966	CK
Zm00001eb111430	1802.91	-0.790756	0.292025	-2.70784	0.00677225	0.029431	CK
Zm00001eb197520	50.5412	-0.790696	0.316492	-2.49831	0.0124785	0.0476837	CK
Zm00001eb244200	1272.45	-0.790613	0.129164	-6.12101	9.29831e-10	8.45674e-08	CK
Zm00001eb157680	49.1529	-0.79054	0.318362	-2.48315	0.0130228	0.0492462	CK
Zm00001eb300890	596.248	-0.790043	0.148779	-5.31017	1.09522e-07	3.90496e-06	CK
Zm00001eb008830	1756.47	-0.790041	0.288327	-2.74009	0.00614226	0.0272448	CK
Zm00001eb178190	1663.25	-0.789838	0.214289	-3.68586	0.000227929	0.00197033	CK
Zm00001eb151280	1156.34	-0.789352	0.155566	-5.07407	3.89396e-07	1.11722e-05	CK
Zm00001eb125980	1345.61	-0.78922	0.268167	-2.94302	0.0032503	0.0164113	CK
Zm00001eb254130	65.5265	-0.788921	0.250461	-3.14988	0.00163338	0.00956092	CK
Zm00001eb271440	1470.47	-0.788768	0.164999	-4.78043	1.74917e-06	3.70625e-05	CK
Zm00001eb241780	325.817	-0.78868	0.231228	-3.41083	0.000647644	0.00453985	CK
Zm00001eb396100	587.566	-0.788296	0.213598	-3.69056	0.000223765	0.00194607	CK
Zm00001eb415630	1942.53	-0.788065	0.190346	-4.14017	3.47045e-05	0.000423478	CK
Zm00001eb155940	253.414	-0.788047	0.183093	-4.30407	1.67687e-05	0.000234937	CK
Zm00001eb433150	249.005	-0.787434	0.190225	-4.13949	3.48085e-05	0.000424473	CK
Zm00001eb433900	85.0591	-0.787262	0.277858	-2.83332	0.00460671	0.0217095	CK
Zm00001eb372310	639.016	-0.787175	0.157913	-4.98487	6.20027e-07	1.61508e-05	CK
Zm00001eb151270	37.0848	-0.78702	0.311264	-2.52847	0.0114562	0.0445234	CK
Zm00001eb126780	325.134	-0.787015	0.244349	-3.22086	0.00127806	0.0078319	CK
Zm00001eb009380	254.881	-0.786865	0.219207	-3.5896	0.000331183	0.00265541	CK
Zm00001eb137370	5199.21	-0.786617	0.194974	-4.03446	5.47276e-05	0.000619554	CK
Zm00001eb330530	4556.54	-0.785949	0.285835	-2.74966	0.00596565	0.0266431	CK
Zm00001eb370330	12397.6	-0.785924	0.225596	-3.48377	0.000494411	0.00364049	CK
Zm00001eb027820	349.967	-0.78588	0.214809	-3.6585	0.000253698	0.00214723	CK
Zm00001eb362170	1036.69	-0.785323	0.272087	-2.88629	0.0038981	0.0189596	CK
Zm00001eb014090	148.813	-0.784945	0.214236	-3.66392	0.000248381	0.00211235	CK
Zm00001eb300290	158.936	-0.784938	0.296	-2.65182	0.00800589	0.0336938	CK
Zm00001eb265510	279.366	-0.784917	0.164611	-4.76832	1.85765e-06	3.87113e-05	CK
Zm00001eb199470	2949.29	-0.784884	0.164407	-4.77403	1.80577e-06	3.79618e-05	CK
Zm00001eb320150	58.6928	-0.784873	0.275951	-2.84424	0.00445171	0.0211163	CK
Zm00001eb237260	154.14	-0.78449	0.234199	-3.34968	0.000809051	0.00542502	CK
Zm00001eb390830	108.077	-0.783863	0.162106	-4.83549	1.3282e-06	2.98205e-05	CK
Zm00001eb138550	45.509	-0.783634	0.284152	-2.7578	0.00581924	0.026147	CK
Zm00001eb295750	3196.62	-0.783507	0.160244	-4.88947	1.01108e-06	2.40065e-05	CK
Zm00001eb240700	9313.69	-0.781306	0.175432	-4.4536	8.44408e-06	0.000135358	CK
Zm00001eb001560	1486.56	-0.781093	0.265599	-2.94087	0.00327292	0.0164906	CK
Zm00001eb156640	302.19	-0.780967	0.13732	-5.6872	1.2914e-08	6.77719e-07	CK
Zm00001eb304520	413.373	-0.780733	0.228646	-3.41459	0.00063877	0.00448796	CK
Zm00001eb162180	183.09	-0.780586	0.244528	-3.19222	0.00141186	0.00848975	CK
Zm00001eb408940	607.187	-0.780582	0.219625	-3.55416	0.000379187	0.00295529	CK
Zm00001eb067230	607.554	-0.780386	0.265943	-2.93441	0.0033418	0.016755	CK
Zm00001eb040560	323.219	-0.779455	0.183459	-4.24866	2.15052e-05	0.000284861	CK
Zm00001eb169490	458.923	-0.779389	0.121136	-6.43402	1.2427e-10	1.82678e-08	CK
Zm00001eb120100	933.679	-0.778793	0.261502	-2.97815	0.00289996	0.0150386	CK
Zm00001eb006660	369.827	-0.778665	0.18987	-4.10103	4.11309e-05	0.000488563	CK
Zm00001eb417370	8141.72	-0.778594	0.167831	-4.63916	3.49832e-06	6.4731e-05	CK
Zm00001eb357640	455.796	-0.778487	0.171141	-4.54882	5.39488e-06	9.24147e-05	CK
Zm00001eb137580	486.727	-0.778131	0.170691	-4.5587	5.14704e-06	8.85934e-05	CK
Zm00001eb405650	107.851	-0.777494	0.196602	-3.95466	7.66442e-05	0.000808398	CK
Zm00001eb332810	332.39	-0.776757	0.221102	-3.51311	0.000442892	0.00334255	CK
Zm00001eb204590	247.409	-0.776709	0.176495	-4.40075	1.07877e-05	0.000165745	CK
Zm00001eb122190	335.823	-0.776616	0.195143	-3.97972	6.8997e-05	0.00074532	CK
Zm00001eb202140	284.813	-0.776401	0.213098	-3.64341	0.000269053	0.00225408	CK
Zm00001eb061250	401.313	-0.776184	0.212151	-3.65864	0.000253558	0.00214689	CK
Zm00001eb257920	920.473	-0.775786	0.180044	-4.30888	1.64087e-05	0.000231552	CK
Zm00001eb161590	65.8314	-0.775432	0.279547	-2.77389	0.00553908	0.0250997	CK
Zm00001eb164130	65.3871	-0.775303	0.303785	-2.55214	0.0107062	0.0422112	CK
Zm00001eb415250	401.298	-0.775233	0.199435	-3.88716	0.000101426	0.00100974	CK
Zm00001eb007320	1978.53	-0.775113	0.164923	-4.69984	2.6036e-06	5.08495e-05	CK
Zm00001eb344760	519.728	-0.774913	0.168823	-4.5901	4.4304e-06	7.83312e-05	CK
Zm00001eb287590	230.993	-0.77484	0.146332	-5.29509	1.18958e-07	4.21341e-06	CK
Zm00001eb085380	282.503	-0.773499	0.202627	-3.81735	0.000134895	0.00128	CK
Zm00001eb039010	45635.2	-0.773224	0.240485	-3.21527	0.00130324	0.00796261	CK
Zm00001eb426510	2705.41	-0.772993	0.159846	-4.83585	1.32577e-06	2.98035e-05	CK
Zm00001eb146390	310.574	-0.772979	0.258499	-2.99026	0.00278744	0.0145748	CK
Zm00001eb122670	276.68	-0.772969	0.213588	-3.61897	0.000295783	0.00242873	CK
Zm00001eb229460	11312.5	-0.772904	0.192794	-4.00896	6.09865e-05	0.000675445	CK
Zm00001eb136040	83.0549	-0.772847	0.289315	-2.6713	0.00755576	0.0321486	CK
Zm00001eb098370	866.01	-0.772542	0.128771	-5.99935	1.98107e-09	1.53508e-07	CK
Zm00001eb338750	709.228	-0.771971	0.203457	-3.79428	0.000148074	0.00138218	CK
Zm00001eb434220	546.259	-0.771902	0.17684	-4.36497	1.27139e-05	0.000188852	CK
Zm00001eb057440	63.5887	-0.771822	0.306119	-2.52131	0.0116918	0.0452657	CK
Zm00001eb173980	359.875	-0.771599	0.185145	-4.16754	3.07902e-05	0.000382676	CK
Zm00001eb346150	2855.23	-0.77063	0.172197	-4.47529	7.6307e-06	0.000123705	CK
Zm00001eb165870	78.9743	-0.770335	0.221908	-3.47141	0.000517726	0.00378619	CK
Zm00001eb068120	455.107	-0.770309	0.231765	-3.32366	0.000888446	0.00585137	CK
Zm00001eb196030	402.451	-0.769511	0.202122	-3.80717	0.000140567	0.00132388	CK
Zm00001eb358400	303.326	-0.769305	0.203503	-3.78031	0.000156632	0.00145099	CK
Zm00001eb221810	312.647	-0.768849	0.236911	-3.24531	0.00117322	0.00731397	CK
Zm00001eb019840	326.98	-0.768835	0.207661	-3.70236	0.000213604	0.0018744	CK
Zm00001eb428190	166.966	-0.768788	0.221953	-3.46375	0.000532703	0.0038746	CK
Zm00001eb333900	295.352	-0.76815	0.298717	-2.57149	0.0101261	0.0404771	CK
Zm00001eb346420	83.6806	-0.767994	0.259897	-2.955	0.00312674	0.0159535	CK
Zm00001eb312590	268.684	-0.767853	0.18967	-4.04835	5.15795e-05	0.000588884	CK
Zm00001eb333380	134.779	-0.76763	0.210142	-3.6529	0.000259292	0.00218424	CK
Zm00001eb421790	273.058	-0.767456	0.231379	-3.31687	0.000910312	0.00597156	CK
Zm00001eb107750	129.662	-0.767423	0.244695	-3.13624	0.00171127	0.00993256	CK
Zm00001eb096480	350.267	-0.767283	0.286758	-2.67572	0.00745699	0.0317908	CK
Zm00001eb320460	281.16	-0.767178	0.175639	-4.36794	1.25426e-05	0.000186954	CK
Zm00001eb090510	106.909	-0.766955	0.19247	-3.98479	6.75387e-05	0.000733258	CK
Zm00001eb054260	659.535	-0.766512	0.140387	-5.45998	4.76194e-08	1.96558e-06	CK
Zm00001eb043120	221.749	-0.766342	0.173026	-4.42905	9.46498e-06	0.000147965	CK
Zm00001eb323410	622.987	-0.766339	0.185983	-4.12048	3.78092e-05	0.000454642	CK
Zm00001eb299790	421.417	-0.766337	0.236089	-3.24596	0.00117054	0.00730181	CK
Zm00001eb352540	291.682	-0.765933	0.274609	-2.78918	0.00528419	0.024173	CK
Zm00001eb138460	728.016	-0.765739	0.194947	-3.92793	8.56784e-05	0.000882015	CK
Zm00001eb259950	2046.62	-0.765371	0.134283	-5.69969	1.20024e-08	6.37673e-07	CK
Zm00001eb266300	1820.77	-0.765269	0.143473	-5.33388	9.61363e-08	3.54883e-06	CK
Zm00001eb200680	362.639	-0.764973	0.121583	-6.29176	3.13881e-10	3.50892e-08	CK
Zm00001eb013440	156.076	-0.764447	0.231168	-3.30689	0.000943388	0.0061472	CK
Zm00001eb220470	73.8694	-0.764291	0.285669	-2.67544	0.00746317	0.0318026	CK
Zm00001eb341260	324.394	-0.764267	0.103625	-7.37531	1.63967e-13	1.85231e-10	CK
Zm00001eb393020	358.882	-0.763537	0.149546	-5.10571	3.29555e-07	9.74321e-06	CK
Zm00001eb002690	288.535	-0.763517	0.219004	-3.48632	0.00048972	0.00361836	CK
Zm00001eb326960	274.897	-0.763357	0.143096	-5.33459	9.57615e-08	3.54384e-06	CK
Zm00001eb371960	295.669	-0.763323	0.166384	-4.58772	4.48104e-06	7.90962e-05	CK
Zm00001eb022240	296.462	-0.763284	0.157921	-4.83333	1.34265e-06	3.0024e-05	CK
Zm00001eb090620	119.895	-0.763169	0.300999	-2.53545	0.0112302	0.0438345	CK
Zm00001eb236500	214.238	-0.762838	0.301178	-2.53285	0.011314	0.0440813	CK
Zm00001eb028370	606.703	-0.762674	0.119312	-6.39226	1.63452e-10	2.23509e-08	CK
Zm00001eb314300	400.199	-0.762497	0.170335	-4.47646	7.58924e-06	0.000123126	CK
Zm00001eb072670	213.902	-0.76225	0.198056	-3.84867	0.000118762	0.00115135	CK
Zm00001eb051750	136.183	-0.762152	0.176938	-4.30746	1.65142e-05	0.000232282	CK
Zm00001eb420910	352.492	-0.762121	0.232334	-3.28029	0.00103702	0.0066305	CK
Zm00001eb089740	369.003	-0.762059	0.167346	-4.55379	5.26879e-06	9.04715e-05	CK
Zm00001eb217750	596.139	-0.76204	0.107144	-7.11232	1.14111e-12	7.52144e-10	CK
Zm00001eb016180	594.57	-0.761986	0.161576	-4.71597	2.40563e-06	4.75455e-05	CK
Zm00001eb084490	425.157	-0.761049	0.26129	-2.91266	0.00358366	0.0177234	CK
Zm00001eb254540	2852.17	-0.760601	0.208945	-3.6402	0.000272427	0.00227613	CK
Zm00001eb221490	176.936	-0.760403	0.256004	-2.97028	0.00297531	0.0153404	CK
Zm00001eb164860	187.856	-0.760385	0.260181	-2.92252	0.00347207	0.0172951	CK
Zm00001eb391570	27.4884	-0.760226	0.301235	-2.52369	0.0116129	0.0450171	CK
Zm00001eb237050	360.622	-0.759788	0.145862	-5.20894	1.89925e-07	6.16726e-06	CK
Zm00001eb404780	18261.6	-0.759596	0.162313	-4.67982	2.87132e-06	5.50759e-05	CK
Zm00001eb322880	140.047	-0.759131	0.278862	-2.72225	0.00648392	0.0284035	CK
Zm00001eb295000	283.898	-0.759077	0.219444	-3.4591	0.000541981	0.00393145	CK
Zm00001eb198580	281.938	-0.758721	0.159602	-4.75382	1.99607e-06	4.07258e-05	CK
Zm00001eb245020	629.685	-0.758707	0.151702	-5.00128	5.69498e-07	1.51097e-05	CK
Zm00001eb090160	739.139	-0.758679	0.185919	-4.08071	4.48993e-05	0.000526622	CK
Zm00001eb192260	161.698	-0.758203	0.232692	-3.2584	0.00112042	0.0070421	CK
Zm00001eb078440	35076.2	-0.75793	0.132783	-5.70802	1.14299e-08	6.13329e-07	CK
Zm00001eb280210	899.656	-0.757857	0.235304	-3.22075	0.00127856	0.0078319	CK
Zm00001eb192500	439.956	-0.757841	0.248713	-3.04705	0.00231101	0.0125929	CK
Zm00001eb050140	380.441	-0.757714	0.191121	-3.96457	7.35286e-05	0.000785833	CK
Zm00001eb382490	417.355	-0.757378	0.15704	-4.82284	1.41526e-06	3.1349e-05	CK
Zm00001eb328600	58.277	-0.75703	0.304289	-2.48786	0.0128513	0.0487056	CK
Zm00001eb242120	228.161	-0.756985	0.161263	-4.69411	2.67765e-06	5.18973e-05	CK
Zm00001eb147400	72.423	-0.756741	0.25618	-2.95394	0.00313746	0.0159882	CK
Zm00001eb372490	161.932	-0.756613	0.195096	-3.87816	0.000105249	0.00104152	CK
Zm00001eb350690	172.54	-0.756389	0.248289	-3.0464	0.00231598	0.0126136	CK
Zm00001eb395750	386.17	-0.756297	0.127974	-5.90978	3.42566e-09	2.39151e-07	CK
Zm00001eb112200	231.311	-0.75537	0.235228	-3.21122	0.00132171	0.00806174	CK
Zm00001eb075730	1152.26	-0.75519	0.143009	-5.28071	1.28687e-07	4.46947e-06	CK
Zm00001eb216550	174.217	-0.75517	0.204577	-3.69138	0.000223041	0.00194056	CK
Zm00001eb245950	1264.85	-0.754776	0.107465	-7.02349	2.16399e-12	1.25535e-09	CK
Zm00001eb398770	186.401	-0.754297	0.241542	-3.12284	0.00179113	0.0102959	CK
Zm00001eb272640	695.526	-0.754135	0.173916	-4.33621	1.44962e-05	0.000210093	CK
Zm00001eb155080	87.6531	-0.752088	0.240347	-3.12918	0.00175294	0.0101252	CK
Zm00001eb351150	208.135	-0.751932	0.171821	-4.37626	1.20732e-05	0.00018147	CK
Zm00001eb100350	256.045	-0.751898	0.137425	-5.47134	4.46651e-08	1.85573e-06	CK
Zm00001eb179690	122.532	-0.751797	0.243241	-3.09075	0.00199653	0.0112238	CK
Zm00001eb068240	337.105	-0.751417	0.164873	-4.55754	5.1757e-06	8.90153e-05	CK
Zm00001eb418440	937.743	-0.75123	0.259578	-2.89404	0.00380314	0.0185694	CK
Zm00001eb204630	192.28	-0.7512	0.166334	-4.51622	6.29525e-06	0.000105729	CK
Zm00001eb269840	525.178	-0.751165	0.114865	-6.53953	6.17142e-11	1.18271e-08	CK
Zm00001eb235240	1040.26	-0.75096	0.191919	-3.91291	9.11924e-05	0.000926338	CK
Zm00001eb399890	596.094	-0.750716	0.187877	-3.99579	6.44791e-05	0.000705033	CK
Zm00001eb161080	189.627	-0.750212	0.14053	-5.33843	9.37551e-08	3.48159e-06	CK
Zm00001eb015860	403.589	-0.750103	0.16106	-4.65728	3.20407e-06	6.05511e-05	CK
Zm00001eb070780	925.118	-0.749851	0.289821	-2.58729	0.00967345	0.0391609	CK
Zm00001eb343950	1905.47	-0.749662	0.203694	-3.68033	0.000232933	0.00200067	CK
Zm00001eb022710	2321.33	-0.749411	0.276236	-2.71294	0.00666897	0.0290704	CK
Zm00001eb277540	139.273	-0.749102	0.205874	-3.63865	0.000274076	0.00228635	CK
Zm00001eb050280	7014.96	-0.749008	0.11545	-6.48772	8.71441e-11	1.44997e-08	CK
Zm00001eb279980	77.6772	-0.74886	0.27183	-2.75489	0.00587125	0.026305	CK
Zm00001eb131420	282.859	-0.748663	0.167918	-4.4585	8.25351e-06	0.0001326	CK
Zm00001eb421240	148.691	-0.748651	0.280229	-2.67156	0.00754987	0.0321378	CK
Zm00001eb352700	342.382	-0.748458	0.208812	-3.58435	0.000337912	0.00269426	CK
Zm00001eb411000	1024.79	-0.748334	0.185505	-4.03404	5.48258e-05	0.000620338	CK
Zm00001eb389440	1076.68	-0.747609	0.189795	-3.93903	8.18128e-05	0.000851892	CK
Zm00001eb127110	558.225	-0.746967	0.213442	-3.49963	0.000465912	0.00347838	CK
Zm00001eb220420	203.23	-0.746576	0.178589	-4.18042	2.90967e-05	0.000366509	CK
Zm00001eb119080	177.644	-0.745756	0.206667	-3.60849	0.000307985	0.00250496	CK
Zm00001eb129330	300.167	-0.745711	0.221587	-3.36532	0.000764536	0.00517177	CK
Zm00001eb350710	128.287	-0.745668	0.240855	-3.09592	0.00196205	0.0110708	CK
Zm00001eb253130	478.003	-0.745456	0.139155	-5.35702	8.4608e-08	3.17688e-06	CK
Zm00001eb049790	134.517	-0.74545	0.299513	-2.48888	0.0128147	0.0486134	CK
Zm00001eb363870	453.085	-0.744968	0.154297	-4.82814	1.37812e-06	3.06212e-05	CK
Zm00001eb414860	119.018	-0.744277	0.268521	-2.77176	0.0055754	0.0252363	CK
Zm00001eb017070	347.017	-0.744243	0.236758	-3.14348	0.00166951	0.00974291	CK
Zm00001eb286930	160.468	-0.744146	0.28889	-2.57588	0.0099986	0.0401296	CK
Zm00001eb288440	233.43	-0.743605	0.243423	-3.05478	0.00225222	0.0123321	CK
Zm00001eb269400	1326.93	-0.743117	0.138168	-5.37838	7.51611e-08	2.8632e-06	CK
Zm00001eb207360	117.117	-0.742694	0.212284	-3.49859	0.000467723	0.00348583	CK
Zm00001eb353970	14909.1	-0.742539	0.14161	-5.24355	1.57517e-07	5.24991e-06	CK
Zm00001eb099920	591.382	-0.742307	0.220939	-3.35978	0.000780046	0.00526175	CK
Zm00001eb040310	100.286	-0.742196	0.241814	-3.06929	0.00214569	0.0119006	CK
Zm00001eb325650	603.085	-0.74219	0.212575	-3.49143	0.000480438	0.00356081	CK
Zm00001eb145950	591.349	-0.742122	0.195835	-3.78953	0.00015093	0.00140423	CK
Zm00001eb339120	141.616	-0.741559	0.290354	-2.55399	0.0106498	0.0420893	CK
Zm00001eb351910	147.025	-0.741074	0.198634	-3.73084	0.00019084	0.00171102	CK
Zm00001eb252090	112.054	-0.741049	0.245022	-3.02441	0.00249116	0.0133709	CK
Zm00001eb091400	512.206	-0.740955	0.189669	-3.90657	9.36161e-05	0.00094648	CK
Zm00001eb213010	209.757	-0.740657	0.252166	-2.93718	0.00331213	0.0166374	CK
Zm00001eb106580	512.132	-0.740583	0.143467	-5.16206	2.44251e-07	7.65344e-06	CK
Zm00001eb360290	158.446	-0.740462	0.189704	-3.90325	9.49082e-05	0.000957425	CK
Zm00001eb191180	208.654	-0.740357	0.170969	-4.33035	1.48873e-05	0.000214746	CK
Zm00001eb205290	242.848	-0.74035	0.205368	-3.60499	0.000312161	0.00252743	CK
Zm00001eb159320	192.809	-0.740274	0.259088	-2.85723	0.00427357	0.0204058	CK
Zm00001eb122300	186.534	-0.740015	0.218962	-3.37965	0.000725792	0.00497553	CK
Zm00001eb255750	163.465	-0.739841	0.204843	-3.61176	0.00030413	0.00248113	CK
Zm00001eb270920	1005.77	-0.739733	0.14654	-5.04798	4.46509e-07	1.23983e-05	CK
Zm00001eb308540	110.733	-0.73969	0.23807	-3.10703	0.00188978	0.0107364	CK
Zm00001eb129910	1092.98	-0.73943	0.206233	-3.58542	0.000336537	0.00268429	CK
Zm00001eb302900	154.922	-0.739297	0.16938	-4.36471	1.2729e-05	0.000188899	CK
Zm00001eb369320	1505.39	-0.739281	0.173151	-4.26958	1.95839e-05	0.00026612	CK
Zm00001eb044240	204.378	-0.739097	0.253214	-2.91886	0.00351312	0.017451	CK
Zm00001eb097550	225.695	-0.73845	0.212687	-3.472	0.000516594	0.00378049	CK
Zm00001eb255140	624.523	-0.738104	0.185671	-3.97534	7.0279e-05	0.000756504	CK
Zm00001eb185300	4560.87	-0.737706	0.167311	-4.40918	1.03763e-05	0.000160112	CK
Zm00001eb333650	229.437	-0.737625	0.216161	-3.41238	0.000643975	0.00451883	CK
Zm00001eb167820	1712.68	-0.737421	0.225506	-3.27007	0.0010752	0.00681774	CK
Zm00001eb100210	1614.36	-0.737371	0.224138	-3.28981	0.00100256	0.00645634	CK
Zm00001eb194240	96.7726	-0.73711	0.252496	-2.9193	0.00350823	0.0174399	CK
Zm00001eb363850	120.52	-0.73688	0.204614	-3.60133	0.000316599	0.00255565	CK
Zm00001eb125400	196.83	-0.736873	0.280136	-2.63041	0.00852817	0.0354128	CK
Zm00001eb291970	179.249	-0.736715	0.277336	-2.6564	0.00789799	0.0333443	CK
Zm00001eb147110	1546.14	-0.73609	0.183468	-4.01209	6.01825e-05	0.000669304	CK
Zm00001eb074210	5104.93	-0.736001	0.163157	-4.51101	6.45212e-06	0.000107522	CK
Zm00001eb043400	180.4	-0.735751	0.214049	-3.4373	0.000587545	0.0042079	CK
Zm00001eb109190	562.729	-0.735674	0.152309	-4.83014	1.36436e-06	3.04097e-05	CK
Zm00001eb380190	160.703	-0.735253	0.272013	-2.70301	0.00687149	0.0297658	CK
Zm00001eb275000	244.254	-0.7349	0.178553	-4.11587	3.85728e-05	0.000461396	CK
Zm00001eb014000	691.329	-0.734826	0.244046	-3.01101	0.00260382	0.0138167	CK
Zm00001eb397820	166.392	-0.734253	0.277825	-2.64286	0.00822096	0.0343832	CK
Zm00001eb244970	56.5568	-0.734085	0.283174	-2.59235	0.00953239	0.0387286	CK
Zm00001eb363950	360.676	-0.73392	0.142532	-5.14917	2.61636e-07	8.11524e-06	CK
Zm00001eb385210	1232.68	-0.733801	0.148636	-4.93689	7.9378e-07	1.95836e-05	CK
Zm00001eb259160	313.225	-0.73379	0.152067	-4.82543	1.39699e-06	3.09762e-05	CK
Zm00001eb168540	63.7746	-0.73378	0.291098	-2.52073	0.0117112	0.0453162	CK
Zm00001eb060660	321.703	-0.73262	0.114499	-6.3985	1.56913e-10	2.18026e-08	CK
Zm00001eb021040	580.473	-0.731962	0.190633	-3.83963	0.000123219	0.00118387	CK
Zm00001eb064650	129.621	-0.731624	0.26564	-2.75419	0.0058837	0.0263484	CK
Zm00001eb218730	194.615	-0.731147	0.294319	-2.4842	0.0129844	0.0491181	CK
Zm00001eb242360	3601.51	-0.730945	0.151444	-4.8265	1.38955e-06	3.08431e-05	CK
Zm00001eb201110	113.295	-0.730698	0.275631	-2.651	0.00802538	0.0337362	CK
Zm00001eb357600	255.045	-0.729852	0.203182	-3.59212	0.000328004	0.00263385	CK
Zm00001eb185240	1249.36	-0.729768	0.199614	-3.65589	0.000256292	0.00216492	CK
Zm00001eb419700	80.8448	-0.728989	0.260937	-2.79374	0.00521031	0.0238758	CK
Zm00001eb312010	2903.97	-0.728897	0.203232	-3.58653	0.000335109	0.00267788	CK
Zm00001eb214000	190.166	-0.72881	0.268094	-2.71849	0.00655813	0.0286729	CK
Zm00001eb406780	49.0328	-0.728729	0.268642	-2.71263	0.00667507	0.0290911	CK
Zm00001eb142340	142.918	-0.72862	0.21273	-3.42509	0.000614596	0.00435513	CK
Zm00001eb227800	207.14	-0.727819	0.175544	-4.14608	3.3822e-05	0.000414832	CK
Zm00001eb326640	46.7224	-0.727612	0.224607	-3.2395	0.0011974	0.00743235	CK
Zm00001eb151220	481.636	-0.72747	0.150465	-4.83482	1.33264e-06	2.98579e-05	CK
Zm00001eb214630	125.46	-0.726558	0.225441	-3.22284	0.00126928	0.00779947	CK
Zm00001eb282590	439.691	-0.72596	0.182899	-3.96918	7.21211e-05	0.000774597	CK
Zm00001eb320900	294.982	-0.725945	0.130673	-5.55542	2.76953e-08	1.25677e-06	CK
Zm00001eb385100	86.082	-0.725812	0.192928	-3.76208	0.000168503	0.00154101	CK
Zm00001eb050510	176.924	-0.725722	0.184442	-3.93468	8.33074e-05	0.000863405	CK
Zm00001eb338290	165.541	-0.725592	0.233318	-3.10988	0.00187165	0.0106483	CK
Zm00001eb078010	547.731	-0.725206	0.211959	-3.42145	0.000622875	0.00439638	CK
Zm00001eb280790	1108.92	-0.724806	0.182426	-3.97315	7.09271e-05	0.000762716	CK
Zm00001eb063530	504.203	-0.723413	0.216687	-3.33852	0.000842251	0.00560908	CK
Zm00001eb304580	539.43	-0.723065	0.218002	-3.31678	0.0009106	0.00597162	CK
Zm00001eb312440	406.9	-0.721995	0.105564	-6.83944	7.95039e-12	2.7975e-09	CK
Zm00001eb285430	1688.8	-0.721525	0.21077	-3.42328	0.0006187	0.00437445	CK
Zm00001eb250960	64.056	-0.721145	0.271764	-2.65357	0.00796452	0.0335658	CK
Zm00001eb433960	371.439	-0.720906	0.181122	-3.98022	6.88523e-05	0.000744507	CK
Zm00001eb059160	286.08	-0.720309	0.147326	-4.88921	1.01242e-06	2.40117e-05	CK
Zm00001eb052540	2405.22	-0.719578	0.150125	-4.79318	1.64157e-06	3.52699e-05	CK
Zm00001eb285400	262.879	-0.719117	0.140446	-5.12024	3.05142e-07	9.14745e-06	CK
Zm00001eb060170	390.087	-0.718513	0.134517	-5.34142	9.22188e-08	3.44241e-06	CK
Zm00001eb127670	581.467	-0.718378	0.113539	-6.32713	2.49756e-10	2.98569e-08	CK
Zm00001eb316120	999.637	-0.717632	0.155518	-4.61446	3.94112e-06	7.12056e-05	CK
Zm00001eb385700	1004.08	-0.71736	0.270537	-2.65162	0.0080107	0.0337075	CK
Zm00001eb369250	1485.52	-0.717196	0.114483	-6.26464	3.73683e-10	4.02208e-08	CK
Zm00001eb247760	8405.31	-0.717067	0.18519	-3.87206	0.00010792	0.00106257	CK
Zm00001eb066830	210.048	-0.716879	0.231949	-3.09068	0.001997	0.0112238	CK
Zm00001eb220910	449.18	-0.716118	0.176554	-4.05609	4.99003e-05	0.00057368	CK
Zm00001eb339850	1420.37	-0.715737	0.133567	-5.35863	8.38573e-08	3.15774e-06	CK
Zm00001eb415270	556.096	-0.715443	0.156743	-4.56444	5.0084e-06	8.64397e-05	CK
Zm00001eb054140	203.134	-0.715324	0.237229	-3.01533	0.00256697	0.0136728	CK
Zm00001eb013660	434.641	-0.715319	0.164655	-4.34434	1.39696e-05	0.000203698	CK
Zm00001eb208810	362.764	-0.715005	0.181342	-3.94285	8.05202e-05	0.000841135	CK
Zm00001eb109640	244.855	-0.714607	0.149231	-4.7886	1.6795e-06	3.58695e-05	CK
Zm00001eb259050	147.128	-0.714228	0.238451	-2.99528	0.00274196	0.0143768	CK
Zm00001eb348400	411.809	-0.714058	0.147828	-4.83034	1.363e-06	3.04097e-05	CK
Zm00001eb204890	126.685	-0.71388	0.198071	-3.60415	0.000313173	0.00253371	CK
Zm00001eb404760	729.568	-0.713874	0.270309	-2.64096	0.0082672	0.0345497	CK
Zm00001eb110000	529.48	-0.713633	0.160617	-4.44307	8.86842e-06	0.000140585	CK
Zm00001eb394510	304.724	-0.713538	0.157619	-4.52698	5.98313e-06	0.000101199	CK
Zm00001eb408250	387.743	-0.713501	0.163278	-4.36986	1.24325e-05	0.000185603	CK
Zm00001eb431880	1462.83	-0.713162	0.25003	-2.85231	0.00434029	0.0206701	CK
Zm00001eb387920	488.963	-0.712579	0.169211	-4.21118	2.54038e-05	0.000327648	CK
Zm00001eb231810	115.715	-0.712543	0.167166	-4.26249	2.02159e-05	0.000272902	CK
Zm00001eb105030	739.378	-0.712364	0.215735	-3.30204	0.000959859	0.00623937	CK
Zm00001eb091420	227.998	-0.710912	0.23755	-2.99268	0.0027654	0.0144878	CK
Zm00001eb326030	203.872	-0.710456	0.133596	-5.31795	1.04941e-07	3.79201e-06	CK
Zm00001eb108510	787.793	-0.710084	0.202054	-3.51433	0.000440868	0.00333134	CK
Zm00001eb313400	1947.74	-0.710006	0.17137	-4.14312	3.42619e-05	0.000419508	CK
Zm00001eb391690	5883.65	-0.710006	0.243565	-2.91505	0.00355627	0.0176042	CK
Zm00001eb228190	367.119	-0.709743	0.134889	-5.2617	1.42731e-07	4.84743e-06	CK
Zm00001eb237910	235.414	-0.709516	0.177714	-3.99247	6.53896e-05	0.000712809	CK
Zm00001eb238400	93.3484	-0.708955	0.236223	-3.00122	0.00268904	0.0141569	CK
Zm00001eb122460	248.496	-0.708773	0.148568	-4.7707	1.83589e-06	3.83696e-05	CK
Zm00001eb175730	239.34	-0.708221	0.146219	-4.84358	1.27521e-06	2.89566e-05	CK
Zm00001eb344020	176.514	-0.707758	0.196998	-3.59272	0.000327245	0.00262873	CK
Zm00001eb241150	899.52	-0.707611	0.129422	-5.46748	4.56488e-08	1.89152e-06	CK
Zm00001eb352220	209.57	-0.707155	0.161921	-4.3673	1.25793e-05	0.000187371	CK
Zm00001eb220340	418.024	-0.70693	0.178296	-3.96493	7.34169e-05	0.000785554	CK
Zm00001eb106370	90.8702	-0.706684	0.202376	-3.49193	0.000479543	0.00355664	CK
Zm00001eb351020	1590.99	-0.706527	0.162094	-4.35875	1.3081e-05	0.000193236	CK
Zm00001eb069500	252.175	-0.706517	0.206363	-3.42367	0.000617826	0.0043708	CK
Zm00001eb227970	107.177	-0.706394	0.249284	-2.83369	0.00460135	0.0216919	CK
Zm00001eb078870	242.751	-0.705865	0.283547	-2.48941	0.0127954	0.0485575	CK
Zm00001eb256960	2055.74	-0.705701	0.235856	-2.99208	0.0027708	0.0145019	CK
Zm00001eb287130	105.897	-0.705341	0.174624	-4.03919	5.36366e-05	0.000608165	CK
Zm00001eb125930	976.546	-0.704796	0.186794	-3.77312	0.000161219	0.00148707	CK
Zm00001eb053260	683.772	-0.70424	0.152363	-4.62213	3.79822e-06	6.91475e-05	CK
Zm00001eb051130	1190.35	-0.703745	0.174862	-4.02457	5.70796e-05	0.000640102	CK
Zm00001eb326540	819.176	-0.703629	0.276952	-2.54062	0.0110657	0.0433185	CK
Zm00001eb297990	252.117	-0.703293	0.244375	-2.87793	0.00400297	0.0193513	CK
Zm00001eb343490	421.782	-0.70309	0.135923	-5.17269	2.30746e-07	7.28342e-06	CK
Zm00001eb326130	422.345	-0.702956	0.138381	-5.07986	3.77703e-07	1.09554e-05	CK
Zm00001eb303110	990.376	-0.702941	0.144447	-4.86642	1.13636e-06	2.6483e-05	CK
Zm00001eb091230	135.808	-0.702862	0.199896	-3.51613	0.000437881	0.0033164	CK
Zm00001eb157010	121.969	-0.702661	0.19015	-3.6953	0.000219632	0.00191477	CK
Zm00001eb434430	454.34	-0.702639	0.192028	-3.65905	0.000253151	0.00214476	CK
Zm00001eb069350	220.818	-0.702529	0.151833	-4.62699	3.71013e-06	6.78541e-05	CK
Zm00001eb169480	258.187	-0.702478	0.228745	-3.07101	0.00213339	0.0118568	CK
Zm00001eb005680	101.277	-0.702347	0.237701	-2.95476	0.00312917	0.0159612	CK
Zm00001eb239500	123.949	-0.702152	0.206568	-3.39913	0.000676005	0.00469572	CK
Zm00001eb337300	79.4836	-0.702126	0.248779	-2.82229	0.00476819	0.0222778	CK
Zm00001eb039650	1278.27	-0.701999	0.250871	-2.79825	0.00513811	0.0236205	CK
Zm00001eb374990	311.972	-0.701963	0.170006	-4.12905	3.64266e-05	0.000440733	CK
Zm00001eb242750	521.71	-0.701803	0.166584	-4.2129	2.52112e-05	0.000325626	CK
Zm00001eb189300	584.952	-0.701462	0.210781	-3.32792	0.000874968	0.00577678	CK
Zm00001eb420360	319.706	-0.701117	0.156615	-4.4767	7.58042e-06	0.000123076	CK
Zm00001eb204290	360.432	-0.700309	0.198059	-3.53586	0.00040645	0.00312655	CK
Zm00001eb329280	179.023	-0.699895	0.199945	-3.50045	0.000464482	0.00347253	CK
Zm00001eb165770	279.014	-0.699182	0.145163	-4.81654	1.46072e-06	3.21899e-05	CK
Zm00001eb015240	961.559	-0.698951	0.159417	-4.38441	1.16301e-05	0.000176042	CK
Zm00001eb309110	867.373	-0.698588	0.189206	-3.6922	0.000222323	0.00193509	CK
Zm00001eb246000	249.551	-0.697911	0.194448	-3.58918	0.000331718	0.0026577	CK
Zm00001eb403660	231.667	-0.697495	0.229181	-3.04342	0.00233903	0.0127262	CK
Zm00001eb136890	368.618	-0.697304	0.15995	-4.35952	1.30348e-05	0.000192798	CK
Zm00001eb222860	635.148	-0.69695	0.116272	-5.99412	2.04589e-09	1.57961e-07	CK
Zm00001eb211100	1254.86	-0.696527	0.178662	-3.89857	9.67631e-05	0.000973423	CK
Zm00001eb311860	519.846	-0.696416	0.113613	-6.12972	8.8032e-10	8.11769e-08	CK
Zm00001eb229790	217.446	-0.696328	0.225228	-3.09166	0.00199038	0.0111983	CK
Zm00001eb300280	854.632	-0.696212	0.160431	-4.33964	1.42713e-05	0.00020737	CK
Zm00001eb392880	9419.24	-0.695807	0.151284	-4.59934	4.23828e-06	7.58972e-05	CK
Zm00001eb407080	221.806	-0.695232	0.18181	-3.82394	0.000131336	0.00125177	CK
Zm00001eb158630	512.038	-0.695226	0.180853	-3.84414	0.000120975	0.00116492	CK
Zm00001eb148380	1162.06	-0.694946	0.176256	-3.94281	8.05317e-05	0.000841135	CK
Zm00001eb009770	61.8342	-0.694592	0.249739	-2.78127	0.00541465	0.0246804	CK
Zm00001eb129080	929.19	-0.69443	0.0940697	-7.38208	1.55832e-13	1.85231e-10	CK
Zm00001eb198840	142.933	-0.694079	0.180542	-3.84442	0.00012084	0.00116414	CK
Zm00001eb134290	40.9182	-0.693513	0.278905	-2.48656	0.0128986	0.048833	CK
Zm00001eb332030	604.033	-0.693436	0.167883	-4.13048	3.62013e-05	0.000438254	CK
Zm00001eb288130	169.842	-0.693432	0.232117	-2.98743	0.00281333	0.0146816	CK
Zm00001eb398460	373.182	-0.692821	0.159433	-4.34552	1.38945e-05	0.000203017	CK
Zm00001eb263490	17.3337	-0.692658	0.261888	-2.64486	0.00817245	0.034232	CK
Zm00001eb034840	415.66	-0.692072	0.186363	-3.71357	0.000204352	0.00180651	CK
Zm00001eb313580	89.0154	-0.691919	0.193843	-3.56948	0.000357695	0.00281642	CK
Zm00001eb022120	130.131	-0.691617	0.175337	-3.94451	7.99626e-05	0.000836782	CK
Zm00001eb335590	640.392	-0.691343	0.178659	-3.86962	0.000109007	0.00107081	CK
Zm00001eb411380	23113.7	-0.69098	0.228135	-3.02882	0.00245512	0.0132138	CK
Zm00001eb149240	1041.28	-0.690857	0.195343	-3.53663	0.00040526	0.00311886	CK
Zm00001eb205960	333.387	-0.690651	0.122573	-5.63461	1.75458e-08	8.6775e-07	CK
Zm00001eb088840	98.8334	-0.690484	0.236664	-2.91756	0.00352777	0.0175075	CK
Zm00001eb394980	162.268	-0.690453	0.19019	-3.63034	0.000283051	0.00234481	CK
Zm00001eb008460	204.34	-0.690178	0.151189	-4.565	4.99487e-06	8.63204e-05	CK
Zm00001eb411730	191.588	-0.689922	0.229074	-3.01179	0.00259711	0.0137938	CK
Zm00001eb322390	410.051	-0.689915	0.153666	-4.48971	7.13217e-06	0.000116859	CK
Zm00001eb327160	1350.1	-0.689586	0.163073	-4.22871	2.35039e-05	0.000307743	CK
Zm00001eb005340	94.9192	-0.689331	0.205331	-3.35717	0.000787456	0.00530066	CK
Zm00001eb005450	73.2895	-0.689328	0.207598	-3.32049	0.000898595	0.00590733	CK
Zm00001eb127770	3146.37	-0.689036	0.211637	-3.25575	0.00113095	0.00709995	CK
Zm00001eb010040	1208.08	-0.688289	0.137682	-4.99912	5.75925e-07	1.52613e-05	CK
Zm00001eb000770	3820.71	-0.687891	0.132612	-5.18723	2.13442e-07	6.83779e-06	CK
Zm00001eb077990	505.693	-0.687873	0.172749	-3.98193	6.83579e-05	0.000739906	CK
Zm00001eb301030	164.17	-0.687711	0.192485	-3.57279	0.000353193	0.00278964	CK
Zm00001eb169920	221.115	-0.687617	0.126436	-5.43845	5.37462e-08	2.16844e-06	CK
Zm00001eb362560	138.953	-0.687603	0.189174	-3.63476	0.000278235	0.00231288	CK
Zm00001eb012340	368.318	-0.687249	0.16126	-4.26174	2.02838e-05	0.000273131	CK
Zm00001eb052530	123.011	-0.686876	0.156576	-4.38685	1.15003e-05	0.000174323	CK
Zm00001eb368740	690.378	-0.686573	0.157705	-4.35352	1.33971e-05	0.000197091	CK
Zm00001eb132380	126.481	-0.686567	0.195571	-3.51057	0.000447146	0.00336875	CK
Zm00001eb122320	446.612	-0.686532	0.150411	-4.56438	5.00983e-06	8.64397e-05	CK
Zm00001eb398840	1464.59	-0.6865	0.164662	-4.16915	3.05741e-05	0.000381315	CK
Zm00001eb302370	254.851	-0.686363	0.258918	-2.65089	0.00802801	0.0337406	CK
Zm00001eb220670	245.215	-0.685983	0.168677	-4.06685	4.76527e-05	0.000551605	CK
Zm00001eb352190	367.884	-0.685981	0.194708	-3.52313	0.000426479	0.00324493	CK
Zm00001eb000480	855.411	-0.685975	0.145965	-4.69958	2.60702e-06	5.087e-05	CK
Zm00001eb171010	236.628	-0.685515	0.23276	-2.94516	0.0032279	0.0163212	CK
Zm00001eb249440	108.026	-0.68522	0.222388	-3.08119	0.00206178	0.0115125	CK
Zm00001eb071370	307.419	-0.685124	0.238921	-2.86757	0.00413633	0.019884	CK
Zm00001eb198910	813.965	-0.685065	0.147222	-4.65326	3.26724e-06	6.15158e-05	CK
Zm00001eb288150	1123.79	-0.684813	0.153056	-4.47426	7.66762e-06	0.000124116	CK
Zm00001eb322130	396.372	-0.683973	0.165767	-4.1261	3.68965e-05	0.000445414	CK
Zm00001eb284160	492.857	-0.683966	0.16243	-4.21084	2.54428e-05	0.000327794	CK
Zm00001eb241600	665.399	-0.683722	0.144114	-4.74431	2.09217e-06	4.24848e-05	CK
Zm00001eb117000	5221.14	-0.68366	0.167651	-4.07788	4.54481e-05	0.000531606	CK
Zm00001eb366360	617.03	-0.683644	0.186428	-3.66707	0.00024535	0.00209394	CK
Zm00001eb398370	567.318	-0.683214	0.183272	-3.72787	0.000193101	0.00172697	CK
Zm00001eb384940	161.108	-0.683068	0.16727	-4.08361	4.43411e-05	0.000520667	CK
Zm00001eb426620	559.394	-0.682597	0.180937	-3.77256	0.000161579	0.00148911	CK
Zm00001eb247860	75.3723	-0.68259	0.238552	-2.86138	0.00421798	0.0201681	CK
Zm00001eb368060	1712.91	-0.682385	0.11049	-6.17598	6.57534e-10	6.50383e-08	CK
Zm00001eb098880	180.236	-0.68229	0.243117	-2.80643	0.00500945	0.0231531	CK
Zm00001eb384340	357.37	-0.682259	0.19186	-3.55603	0.000376506	0.00293759	CK
Zm00001eb417150	253.253	-0.681549	0.263769	-2.58389	0.00976933	0.0394327	CK
Zm00001eb232430	168.574	-0.681534	0.21421	-3.18162	0.00146456	0.00875878	CK
Zm00001eb384580	229.753	-0.681239	0.182936	-3.72391	0.000196159	0.00174631	CK
Zm00001eb423070	137.486	-0.681166	0.216901	-3.14044	0.00168694	0.00982855	CK
Zm00001eb327030	72.8673	-0.681136	0.230715	-2.95228	0.00315432	0.0160589	CK
Zm00001eb325230	1853.67	-0.6807	0.111499	-6.10496	1.02826e-09	9.19608e-08	CK
Zm00001eb221690	1376.18	-0.680565	0.105363	-6.45923	1.05237e-10	1.63681e-08	CK
Zm00001eb068460	788.941	-0.680281	0.157835	-4.31006	1.63207e-05	0.000231041	CK
Zm00001eb101900	101.515	-0.679973	0.212	-3.20742	0.00133933	0.00813913	CK
Zm00001eb264670	130.032	-0.679842	0.173504	-3.9183	8.91767e-05	0.000910767	CK
Zm00001eb124320	123.28	-0.678898	0.259515	-2.61603	0.00889589	0.0366772	CK
Zm00001eb032890	101.926	-0.678869	0.1958	-3.46715	0.000526005	0.00383628	CK
Zm00001eb105850	954.773	-0.678436	0.110298	-6.15096	7.70161e-10	7.37979e-08	CK
Zm00001eb430600	385.004	-0.678059	0.132174	-5.13006	2.89643e-07	8.74387e-06	CK
Zm00001eb422130	59.0873	-0.677885	0.254531	-2.66327	0.00773851	0.0327871	CK
Zm00001eb217120	285.374	-0.676328	0.145675	-4.64272	3.4386e-06	6.39015e-05	CK
Zm00001eb289000	307.028	-0.676324	0.228876	-2.95498	0.00312693	0.0159535	CK
Zm00001eb258960	121.872	-0.675991	0.253571	-2.66589	0.00767857	0.0326039	CK
Zm00001eb139130	1863.01	-0.67593	0.159889	-4.22749	2.36314e-05	0.000308616	CK
Zm00001eb052110	103.16	-0.675889	0.210868	-3.20526	0.00134939	0.00818634	CK
Zm00001eb280840	197.84	-0.675711	0.112614	-6.00022	1.97045e-09	1.53508e-07	CK
Zm00001eb353850	464.81	-0.675686	0.133741	-5.05218	4.36789e-07	1.22073e-05	CK
Zm00001eb273440	5243.77	-0.675328	0.147194	-4.588	4.47509e-06	7.90563e-05	CK
Zm00001eb129440	9490.56	-0.674804	0.202351	-3.33482	0.000853558	0.00566505	CK
Zm00001eb032230	1109.21	-0.67473	0.142423	-4.73752	2.16347e-06	4.36846e-05	CK
Zm00001eb047150	201.85	-0.674728	0.141838	-4.75705	1.96447e-06	4.0234e-05	CK
Zm00001eb318780	664.347	-0.674589	0.188657	-3.57575	0.000349224	0.00276698	CK
Zm00001eb093800	213.581	-0.674559	0.168797	-3.99627	6.43486e-05	0.000704323	CK
Zm00001eb106030	166.506	-0.67434	0.218404	-3.08758	0.00201791	0.0113117	CK
Zm00001eb281490	310.596	-0.674302	0.131284	-5.1362	2.80351e-07	8.55969e-06	CK
Zm00001eb225150	211.685	-0.674267	0.146292	-4.60905	4.0452e-06	7.29633e-05	CK
Zm00001eb073350	169.404	-0.673674	0.183811	-3.66505	0.000247295	0.00210622	CK
Zm00001eb278620	386.778	-0.67348	0.171418	-3.92888	8.53416e-05	0.000879391	CK
Zm00001eb130430	98.8395	-0.67346	0.247003	-2.72653	0.00640042	0.0281571	CK
Zm00001eb057430	257.971	-0.673413	0.142681	-4.71972	2.36175e-06	4.67829e-05	CK
Zm00001eb427540	86.9388	-0.6733	0.223863	-3.00764	0.00263288	0.0139295	CK
Zm00001eb387030	637.556	-0.673077	0.12059	-5.58152	2.38419e-08	1.10289e-06	CK
Zm00001eb056200	88.0246	-0.672948	0.242649	-2.77334	0.00554833	0.0251297	CK
Zm00001eb021780	82.8463	-0.672814	0.264544	-2.54329	0.0109814	0.0430667	CK
Zm00001eb093970	282.633	-0.672672	0.137636	-4.88731	1.02223e-06	2.41376e-05	CK
Zm00001eb191060	978.603	-0.672668	0.135619	-4.95997	7.05049e-07	1.78457e-05	CK
Zm00001eb256540	184.576	-0.672636	0.214238	-3.13967	0.00169141	0.00985195	CK
Zm00001eb112680	600.169	-0.672517	0.153448	-4.38271	1.17211e-05	0.00017717	CK
Zm00001eb084750	432.972	-0.672247	0.134546	-4.9964	5.84113e-07	1.54401e-05	CK
Zm00001eb187110	318.728	-0.672188	0.159761	-4.20747	2.58248e-05	0.000331918	CK
Zm00001eb330130	727.738	-0.672091	0.163269	-4.11648	3.84709e-05	0.000460793	CK
Zm00001eb162210	2405.16	-0.671807	0.194753	-3.44954	0.000561539	0.0040473	CK
Zm00001eb044590	1620.7	-0.671757	0.195084	-3.44342	0.000574404	0.00412894	CK
Zm00001eb141920	173.507	-0.670823	0.17192	-3.90194	9.54233e-05	0.000961581	CK
Zm00001eb145790	562.929	-0.67078	0.188029	-3.56743	0.000360503	0.00283437	CK
Zm00001eb199400	471.471	-0.670701	0.202368	-3.31426	0.000918866	0.0060148	CK
Zm00001eb281780	1020.43	-0.6704	0.120027	-5.58541	2.33152e-08	1.0902e-06	CK
Zm00001eb013700	143.179	-0.670395	0.237546	-2.82217	0.00476997	0.0222778	CK
Zm00001eb174900	181.364	-0.670049	0.210457	-3.18378	0.00145364	0.00869833	CK
Zm00001eb200590	734.293	-0.669764	0.14441	-4.63792	3.51938e-06	6.50645e-05	CK
Zm00001eb199410	447.482	-0.669727	0.139712	-4.79363	1.63787e-06	3.52258e-05	CK
Zm00001eb281500	913.32	-0.669069	0.204522	-3.27138	0.00107022	0.00679445	CK
Zm00001eb098990	943.421	-0.668869	0.132784	-5.03728	4.72189e-07	1.29605e-05	CK
Zm00001eb129730	658.281	-0.667586	0.222759	-2.99689	0.00272746	0.0143202	CK
Zm00001eb292290	709.385	-0.667232	0.125447	-5.31883	1.04439e-07	3.78024e-06	CK
Zm00001eb010130	131.461	-0.667144	0.243575	-2.73897	0.00616323	0.0272927	CK
Zm00001eb249380	286.354	-0.667126	0.133827	-4.98497	6.19711e-07	1.61508e-05	CK
Zm00001eb326780	1348.37	-0.666811	0.224461	-2.97072	0.00297104	0.0153257	CK
Zm00001eb155310	333.794	-0.66675	0.101089	-6.59568	4.23317e-11	9.17786e-09	CK
Zm00001eb314380	125.516	-0.666626	0.172508	-3.86433	0.000111395	0.00108985	CK
Zm00001eb352080	1632.86	-0.666184	0.118855	-5.60501	2.08248e-08	9.89077e-07	CK
Zm00001eb307060	555.544	-0.666059	0.203119	-3.27916	0.00104117	0.0066511	CK
Zm00001eb108840	138.205	-0.666029	0.205564	-3.24	0.00119528	0.0074213	CK
Zm00001eb238330	546.177	-0.665295	0.153858	-4.32408	1.53173e-05	0.000219766	CK
Zm00001eb373920	529.531	-0.665074	0.172221	-3.86175	0.000112576	0.00109933	CK
Zm00001eb362330	596.449	-0.664937	0.135654	-4.90172	9.49994e-07	2.29366e-05	CK
Zm00001eb072840	258.671	-0.664912	0.131916	-5.04041	4.64542e-07	1.27997e-05	CK
Zm00001eb304560	1624.72	-0.66489	0.150817	-4.4086	1.0404e-05	0.000160425	CK
Zm00001eb427600	165.193	-0.664885	0.241286	-2.75558	0.00585878	0.0262587	CK
Zm00001eb194800	192.458	-0.664874	0.142941	-4.6514	3.29684e-06	6.20187e-05	CK
Zm00001eb293210	2906.29	-0.664448	0.221262	-3.00299	0.00267343	0.0141058	CK
Zm00001eb163530	1203.13	-0.664348	0.193404	-3.43503	0.000592487	0.00423058	CK
Zm00001eb201090	351.126	-0.664255	0.182822	-3.63334	0.000279771	0.00232212	CK
Zm00001eb315750	2313.46	-0.664	0.131028	-5.06762	4.02827e-07	1.14672e-05	CK
Zm00001eb347780	283.511	-0.663512	0.10163	-6.52869	6.63459e-11	1.19668e-08	CK
Zm00001eb022230	1592.93	-0.663097	0.149131	-4.4464	8.73196e-06	0.000138983	CK
Zm00001eb332290	965.716	-0.66287	0.167903	-3.94793	7.88306e-05	0.000827798	CK
Zm00001eb117130	531.569	-0.662795	0.152173	-4.35555	1.32735e-05	0.000195407	CK
Zm00001eb302930	309.231	-0.66256	0.137638	-4.8138	1.48086e-06	3.24338e-05	CK
Zm00001eb347720	377.907	-0.662333	0.238031	-2.78255	0.00539331	0.0245884	CK
Zm00001eb418750	99.23	-0.662087	0.201322	-3.2887	0.0010065	0.00647395	CK
Zm00001eb029530	184.066	-0.661011	0.19061	-3.46788	0.000524585	0.00383113	CK
Zm00001eb311150	250.453	-0.660566	0.221419	-2.98333	0.00285129	0.0148508	CK
Zm00001eb256180	66.4391	-0.660427	0.242251	-2.72621	0.00640665	0.028173	CK
Zm00001eb383800	472.045	-0.659444	0.138315	-4.7677	1.86345e-06	3.87193e-05	CK
Zm00001eb064870	133.144	-0.659385	0.205179	-3.2137	0.00131036	0.00799705	CK
Zm00001eb384110	900.32	-0.659096	0.238084	-2.76833	0.00563443	0.0254655	CK
Zm00001eb398220	285.714	-0.657809	0.136802	-4.80847	1.52091e-06	3.31757e-05	CK
Zm00001eb400560	283.019	-0.657526	0.171014	-3.84487	0.000120615	0.00116302	CK
Zm00001eb011830	115.576	-0.657515	0.187634	-3.50424	0.000457905	0.00343494	CK
Zm00001eb295860	114.37	-0.657457	0.20571	-3.19604	0.00139329	0.00840042	CK
Zm00001eb124210	2378.29	-0.657384	0.263761	-2.49235	0.0126902	0.0482669	CK
Zm00001eb144260	710.173	-0.657355	0.127804	-5.14348	2.69697e-07	8.31719e-06	CK
Zm00001eb078650	172.991	-0.657	0.146876	-4.47318	7.70661e-06	0.000124466	CK
Zm00001eb374010	76.3082	-0.656934	0.255214	-2.57405	0.0100516	0.040289	CK
Zm00001eb199240	324.235	-0.656849	0.161008	-4.0796	4.51126e-05	0.000528835	CK
Zm00001eb322580	2255.16	-0.656586	0.120777	-5.43634	5.43868e-08	2.18198e-06	CK
Zm00001eb410980	412.665	-0.656293	0.170655	-3.84573	0.000120196	0.00116054	CK
Zm00001eb158860	233.88	-0.656047	0.202331	-3.24245	0.00118507	0.00737069	CK
Zm00001eb336960	400.353	-0.655828	0.166417	-3.94088	8.11844e-05	0.000846304	CK
Zm00001eb423440	481.078	-0.655506	0.24213	-2.70725	0.00678423	0.0294712	CK
Zm00001eb423640	446.867	-0.655411	0.196913	-3.32844	0.000873349	0.00576964	CK
Zm00001eb055830	433.971	-0.655192	0.194119	-3.37521	0.000737594	0.00503874	CK
Zm00001eb403670	109.664	-0.65494	0.155503	-4.21175	2.53401e-05	0.00032706	CK
Zm00001eb380260	1935.25	-0.654867	0.131684	-4.97301	6.59214e-07	1.6986e-05	CK
Zm00001eb399990	178.907	-0.654842	0.176212	-3.71623	0.000202221	0.00178988	CK
Zm00001eb350360	153.385	-0.654056	0.262671	-2.49002	0.0127735	0.0485259	CK
Zm00001eb015930	451.669	-0.653711	0.145552	-4.49127	7.07998e-06	0.00011627	CK
Zm00001eb091980	73.4538	-0.653182	0.246297	-2.65202	0.00800127	0.0336876	CK
Zm00001eb015890	516.74	-0.653132	0.17886	-3.65164	0.000260567	0.0021924	CK
Zm00001eb279890	209.918	-0.653121	0.182072	-3.58716	0.000334303	0.00267442	CK
Zm00001eb168520	138.064	-0.652935	0.255328	-2.55724	0.0105505	0.0418047	CK
Zm00001eb139450	141.475	-0.652859	0.181664	-3.59376	0.000325935	0.0026192	CK
Zm00001eb005530	658.343	-0.652724	0.112905	-5.78118	7.41793e-09	4.41049e-07	CK
Zm00001eb371150	353.033	-0.652272	0.178883	-3.64637	0.000265974	0.00223177	CK
Zm00001eb051160	809.746	-0.652028	0.169521	-3.8463	0.000119914	0.00115852	CK
Zm00001eb031150	1434.86	-0.651475	0.149439	-4.35946	1.30382e-05	0.000192798	CK
Zm00001eb256990	179.734	-0.651058	0.232959	-2.79473	0.00519423	0.0238173	CK
Zm00001eb226270	62.0154	-0.65044	0.262154	-2.48114	0.0130965	0.0494638	CK
Zm00001eb153730	361.989	-0.650379	0.12075	-5.38618	7.19713e-08	2.75856e-06	CK
Zm00001eb295490	794.023	-0.649898	0.129072	-5.03516	4.77437e-07	1.30878e-05	CK
Zm00001eb286120	330.192	-0.649579	0.187737	-3.46005	0.000540066	0.0039215	CK
Zm00001eb258400	313.547	-0.649186	0.222536	-2.91722	0.00353168	0.0175188	CK
Zm00001eb032340	1472.24	-0.64911	0.126454	-5.13319	2.84875e-07	8.68545e-06	CK
Zm00001eb138310	122.31	-0.648579	0.232245	-2.79265	0.00522776	0.0239506	CK
Zm00001eb238000	286.347	-0.648557	0.176166	-3.68151	0.000231854	0.001993	CK
Zm00001eb013250	157.026	-0.648302	0.148943	-4.35268	1.34482e-05	0.000197707	CK
Zm00001eb095790	403.915	-0.648077	0.141304	-4.5864	4.50955e-06	7.94035e-05	CK
Zm00001eb270290	68.8174	-0.647501	0.249852	-2.59154	0.00955477	0.0387975	CK
Zm00001eb175860	188.338	-0.647133	0.249926	-2.5893	0.00961724	0.0389627	CK
Zm00001eb070240	572.092	-0.646905	0.142076	-4.55323	5.28274e-06	9.06385e-05	CK
Zm00001eb227470	2786.67	-0.646869	0.125638	-5.14869	2.62313e-07	8.1245e-06	CK
Zm00001eb351000	690.324	-0.646485	0.090631	-7.13316	9.80939e-13	7.2603e-10	CK
Zm00001eb148920	254.595	-0.646351	0.13087	-4.93888	7.85713e-07	1.94401e-05	CK
Zm00001eb277840	914.829	-0.645907	0.164074	-3.93668	8.2617e-05	0.000857906	CK
Zm00001eb015820	356.591	-0.645882	0.137354	-4.70231	2.57241e-06	5.03779e-05	CK
Zm00001eb282410	690.923	-0.645881	0.179307	-3.60209	0.000315671	0.00255008	CK
Zm00001eb323690	514.779	-0.645507	0.101199	-6.37861	1.78706e-10	2.35325e-08	CK
Zm00001eb052200	341.008	-0.64538	0.166188	-3.88343	0.000102995	0.00102282	CK
Zm00001eb428410	137.377	-0.645301	0.258529	-2.49605	0.0125586	0.0479124	CK
Zm00001eb313700	773.616	-0.64515	0.196486	-3.28344	0.00102548	0.00656847	CK
Zm00001eb081320	208.107	-0.645101	0.165364	-3.9011	9.57565e-05	0.000964485	CK
Zm00001eb145870	757.229	-0.645081	0.254478	-2.53491	0.0112475	0.0438778	CK
Zm00001eb252690	311.864	-0.644945	0.154387	-4.17745	2.94799e-05	0.000369987	CK
Zm00001eb122000	137.465	-0.64482	0.137421	-4.69231	2.70138e-06	5.22836e-05	CK
Zm00001eb102590	1827.57	-0.644701	0.213944	-3.01341	0.00258329	0.0137451	CK
Zm00001eb020690	2063.08	-0.64459	0.134637	-4.78763	1.68762e-06	3.60071e-05	CK
Zm00001eb137480	16839.7	-0.644431	0.19377	-3.32574	0.000881828	0.00581849	CK
Zm00001eb416090	7319.72	-0.644122	0.206812	-3.11452	0.00184242	0.0105319	CK
Zm00001eb421310	60.1185	-0.643961	0.239776	-2.68568	0.00723825	0.0310613	CK
Zm00001eb408630	618.031	-0.64386	0.157505	-4.08788	4.3533e-05	0.000513403	CK
Zm00001eb166410	220.801	-0.643121	0.17452	-3.68508	0.000228633	0.00197228	CK
Zm00001eb172230	3240.87	-0.643112	0.182121	-3.53124	0.000413619	0.00316503	CK
Zm00001eb316920	5961.49	-0.642841	0.184382	-3.48647	0.000489449	0.0036176	CK
Zm00001eb347490	890.446	-0.642697	0.11509	-5.58432	2.34615e-08	1.09236e-06	CK
Zm00001eb026930	92.2147	-0.642146	0.211455	-3.03679	0.00239111	0.012944	CK
Zm00001eb295590	97.4778	-0.641788	0.246803	-2.6004	0.0093114	0.0379601	CK
Zm00001eb050870	361.952	-0.641623	0.125006	-5.13275	2.85536e-07	8.69326e-06	CK
Zm00001eb160480	328.114	-0.641545	0.185742	-3.45396	0.000552425	0.00399638	CK
Zm00001eb327450	698.304	-0.641473	0.128346	-4.998	5.79274e-07	1.53311e-05	CK
Zm00001eb013810	684.474	-0.64124	0.19283	-3.32542	0.000882846	0.00582163	CK
Zm00001eb334770	356.584	-0.640555	0.210335	-3.0454	0.00232372	0.0126493	CK
Zm00001eb366860	458.728	-0.639524	0.214472	-2.98186	0.00286504	0.0149104	CK
Zm00001eb162830	360.724	-0.63937	0.163142	-3.91909	8.88843e-05	0.000908915	CK
Zm00001eb404560	253.082	-0.639232	0.247258	-2.58528	0.00972994	0.039308	CK
Zm00001eb414390	2839.99	-0.638864	0.201914	-3.16404	0.00155594	0.00920021	CK
Zm00001eb378470	667.368	-0.638841	0.20573	-3.10525	0.0019012	0.0107842	CK
Zm00001eb277830	168.257	-0.63813	0.255764	-2.495	0.0125958	0.0479781	CK
Zm00001eb125410	82.3677	-0.63779	0.168787	-3.77867	0.00015767	0.00145872	CK
Zm00001eb120890	483.412	-0.637719	0.128764	-4.9526	7.32281e-07	1.83833e-05	CK
Zm00001eb144890	97.5497	-0.637635	0.204485	-3.11824	0.00181933	0.01043	CK
Zm00001eb082390	80.839	-0.637263	0.226506	-2.81344	0.00490138	0.0227614	CK
Zm00001eb401580	74.6762	-0.637243	0.252377	-2.52497	0.011571	0.0448788	CK
Zm00001eb273300	82.6116	-0.637142	0.180883	-3.5224	0.000427663	0.00325278	CK
Zm00001eb145850	157.61	-0.637059	0.158307	-4.0242	5.71693e-05	0.000640439	CK
Zm00001eb072290	435.809	-0.636947	0.125481	-5.07604	3.85385e-07	1.10883e-05	CK
Zm00001eb237750	479.221	-0.636898	0.1386	-4.59521	4.32314e-06	7.70057e-05	CK
Zm00001eb419590	431.369	-0.636689	0.148189	-4.29646	1.73547e-05	0.000241883	CK
Zm00001eb098840	106.838	-0.636575	0.241802	-2.63263	0.00847263	0.0352435	CK
Zm00001eb043580	375.192	-0.636476	0.18614	-3.41934	0.000627733	0.00442494	CK
Zm00001eb091430	350.374	-0.635732	0.245388	-2.59072	0.00957746	0.038864	CK
Zm00001eb332820	152.97	-0.635526	0.16592	-3.83032	0.000127977	0.00122302	CK
Zm00001eb216980	143.682	-0.635032	0.164244	-3.86639	0.000110459	0.00108309	CK
Zm00001eb431800	124.229	-0.634883	0.254507	-2.49455	0.0126115	0.0480076	CK
Zm00001eb275090	454.571	-0.634796	0.149234	-4.2537	2.10268e-05	0.000280672	CK
Zm00001eb019160	811.548	-0.63467	0.182367	-3.48018	0.000501086	0.00368333	CK
Zm00001eb355140	1042.01	-0.634394	0.129792	-4.88777	1.01987e-06	2.41319e-05	CK
Zm00001eb433330	869.045	-0.633856	0.158242	-4.00561	6.18574e-05	0.00068368	CK
Zm00001eb288390	365.806	-0.633844	0.19163	-3.30764	0.000940851	0.00613454	CK
Zm00001eb128070	135.791	-0.633609	0.174644	-3.62801	0.000285617	0.00236151	CK
Zm00001eb045300	170.122	-0.633424	0.215193	-2.94351	0.00324511	0.0163928	CK
Zm00001eb300120	1309.36	-0.63303	0.251949	-2.51253	0.011987	0.0462176	CK
Zm00001eb253110	2067.22	-0.632603	0.18696	-3.38362	0.000715365	0.00491505	CK
Zm00001eb148640	761.138	-0.63241	0.114523	-5.52214	3.34899e-08	1.47407e-06	CK
Zm00001eb419600	147.354	-0.632224	0.177226	-3.56733	0.000360638	0.0028344	CK
Zm00001eb096940	261.533	-0.631997	0.217559	-2.90495	0.00367316	0.018044	CK
Zm00001eb395120	745.338	-0.631795	0.091832	-6.8799	5.98965e-12	2.34213e-09	CK
Zm00001eb335970	1693.15	-0.630853	0.134861	-4.67782	2.89943e-06	5.54171e-05	CK
Zm00001eb019470	548.144	-0.630608	0.124863	-5.05039	4.40918e-07	1.22713e-05	CK
Zm00001eb214540	2122.66	-0.63053	0.179346	-3.51571	0.00043858	0.00331848	CK
Zm00001eb138100	384.895	-0.630488	0.147245	-4.28191	1.85299e-05	0.00025479	CK
Zm00001eb384620	485.313	-0.630151	0.159075	-3.96134	7.45308e-05	0.00079256	CK
Zm00001eb043310	425.64	-0.629648	0.145275	-4.33418	1.46303e-05	0.000211607	CK
Zm00001eb024960	265.079	-0.62947	0.154036	-4.08651	4.37915e-05	0.000515601	CK
Zm00001eb039270	157.743	-0.629423	0.232934	-2.70215	0.00688931	0.029825	CK
Zm00001eb060470	1219.83	-0.629356	0.161745	-3.89103	9.98181e-05	0.000997781	CK
Zm00001eb148930	138.408	-0.628998	0.181498	-3.46559	0.000529074	0.00385604	CK
Zm00001eb229610	288.457	-0.628879	0.148762	-4.22743	2.36379e-05	0.000308616	CK
Zm00001eb433420	907.693	-0.628383	0.139287	-4.51143	6.43915e-06	0.000107389	CK
Zm00001eb434590	1429.5	-0.628368	0.155545	-4.03978	5.35023e-05	0.000607284	CK
Zm00001eb105770	179.238	-0.628159	0.171445	-3.66391	0.000248396	0.00211235	CK
Zm00001eb266560	838.142	-0.62787	0.18853	-3.33034	0.000867395	0.00574894	CK
Zm00001eb392390	1072.99	-0.62771	0.143522	-4.37361	1.22211e-05	0.000183179	CK
Zm00001eb286430	177.722	-0.62709	0.243708	-2.57313	0.0100785	0.0403515	CK
Zm00001eb324960	255.61	-0.627038	0.176054	-3.56163	0.000368563	0.00288506	CK
Zm00001eb082030	227.084	-0.626578	0.230042	-2.72376	0.00645441	0.0283192	CK
Zm00001eb319050	395.107	-0.626572	0.191127	-3.27831	0.00104431	0.00666718	CK
Zm00001eb413610	265.475	-0.626551	0.202825	-3.08912	0.00200748	0.0112661	CK
Zm00001eb186420	172.008	-0.626512	0.193164	-3.24342	0.00118103	0.00735196	CK
Zm00001eb088190	63.3236	-0.626391	0.245152	-2.55512	0.0106152	0.0420145	CK
Zm00001eb060780	244.514	-0.626358	0.130387	-4.80385	1.55647e-06	3.38138e-05	CK
Zm00001eb360890	1256.56	-0.626327	0.147074	-4.25858	2.05734e-05	0.000275648	CK
Zm00001eb251380	356.77	-0.625987	0.151442	-4.13352	3.57244e-05	0.000433766	CK
Zm00001eb381210	2940.33	-0.625798	0.148925	-4.2021	2.64447e-05	0.000338468	CK
Zm00001eb045350	121.53	-0.625687	0.189664	-3.29893	0.00097054	0.00628786	CK
Zm00001eb389150	65.3879	-0.625272	0.219348	-2.8506	0.00436373	0.0207587	CK
Zm00001eb085330	418.486	-0.625105	0.184977	-3.37936	0.000726548	0.00497912	CK
Zm00001eb102460	421.834	-0.624768	0.132344	-4.72078	2.34938e-06	4.66055e-05	CK
Zm00001eb325910	244.664	-0.624591	0.198995	-3.13873	0.00169683	0.00987546	CK
Zm00001eb371630	840.748	-0.624504	0.157049	-3.97649	6.99408e-05	0.000753998	CK
Zm00001eb236270	202.846	-0.624412	0.137433	-4.54338	5.53589e-06	9.45284e-05	CK
Zm00001eb158170	759.675	-0.624229	0.160354	-3.89282	9.90837e-05	0.000991946	CK
Zm00001eb206750	168.393	-0.624206	0.198963	-3.1373	0.00170513	0.00990997	CK
Zm00001eb004660	1666.83	-0.62345	0.103352	-6.03232	1.61621e-09	1.30907e-07	CK
Zm00001eb285950	358.591	-0.623224	0.141652	-4.39968	1.08408e-05	0.000166324	CK
Zm00001eb243480	212.946	-0.623217	0.249842	-2.49444	0.0126155	0.0480104	CK
Zm00001eb058880	511.962	-0.623175	0.162519	-3.83448	0.000125828	0.00120571	CK
Zm00001eb356520	714.639	-0.62297	0.237549	-2.62249	0.00872901	0.036107	CK
Zm00001eb246860	3449.83	-0.622885	0.112721	-5.52591	3.27785e-08	1.45343e-06	CK
Zm00001eb296120	3157.07	-0.622581	0.127074	-4.89936	9.61475e-07	2.31076e-05	CK
Zm00001eb292770	204.47	-0.622555	0.157758	-3.94626	7.93818e-05	0.000832581	CK
Zm00001eb237570	427.315	-0.622533	0.196879	-3.162	0.00156688	0.00924708	CK
Zm00001eb327310	102.988	-0.622307	0.245196	-2.538	0.0111489	0.0435753	CK
Zm00001eb034800	366.169	-0.622177	0.17821	-3.49126	0.000480748	0.00356103	CK
Zm00001eb286740	129.802	-0.62169	0.206792	-3.00635	0.00264401	0.0139815	CK
Zm00001eb366580	264.989	-0.621669	0.103971	-5.97926	2.24152e-09	1.67638e-07	CK
Zm00001eb431960	225.443	-0.621442	0.22016	-2.82269	0.00476228	0.0222551	CK
Zm00001eb092730	101.858	-0.621248	0.221943	-2.79913	0.00512398	0.0235606	CK
Zm00001eb279930	840.203	-0.621171	0.124387	-4.99388	5.91787e-07	1.56046e-05	CK
Zm00001eb302680	655.697	-0.621116	0.113803	-5.45782	4.82005e-08	1.98012e-06	CK
Zm00001eb258370	134.413	-0.620791	0.154313	-4.02292	5.74807e-05	0.000642921	CK
Zm00001eb128160	187.387	-0.62069	0.175428	-3.53815	0.00040294	0.00310435	CK
Zm00001eb009780	340.48	-0.619543	0.223836	-2.76784	0.00564293	0.0254882	CK
Zm00001eb099620	87.1685	-0.61946	0.20554	-3.01381	0.00257988	0.0137303	CK
Zm00001eb382480	1647.72	-0.619174	0.147035	-4.21107	2.54162e-05	0.000327648	CK
Zm00001eb117430	2394.28	-0.619097	0.123279	-5.02192	5.11579e-07	1.38468e-05	CK
Zm00001eb234530	287.442	-0.618942	0.182364	-3.39399	0.000688816	0.00476927	CK
Zm00001eb235530	378.22	-0.618454	0.146599	-4.21868	2.45734e-05	0.00031889	CK
Zm00001eb330600	2911.97	-0.618379	0.0954335	-6.47969	9.19115e-11	1.49415e-08	CK
Zm00001eb291860	209.141	-0.617979	0.197083	-3.13563	0.00171485	0.00995066	CK
Zm00001eb093460	245.59	-0.617932	0.132925	-4.64871	3.34016e-06	6.25596e-05	CK
Zm00001eb363340	391.834	-0.617729	0.154097	-4.00871	6.1051e-05	0.000675811	CK
Zm00001eb238800	428.12	-0.617599	0.229481	-2.69129	0.00711763	0.0306527	CK
Zm00001eb391320	954.142	-0.617068	0.176293	-3.50025	0.00046483	0.00347272	CK
Zm00001eb274400	241.268	-0.617066	0.141074	-4.37405	1.21964e-05	0.000183054	CK
Zm00001eb010140	2635.04	-0.617044	0.161974	-3.80952	0.000139235	0.00131364	CK
Zm00001eb224740	163.494	-0.617014	0.236132	-2.61301	0.00897498	0.0369253	CK
Zm00001eb121890	82.0725	-0.616706	0.224155	-2.75125	0.00593684	0.0265531	CK
Zm00001eb358080	85.0153	-0.61652	0.182784	-3.37295	0.000743685	0.00507066	CK
Zm00001eb366290	775.751	-0.616315	0.139765	-4.40966	1.03534e-05	0.000159874	CK
Zm00001eb100190	305.57	-0.616265	0.182138	-3.38351	0.000715648	0.00491541	CK
Zm00001eb370370	556.137	-0.616244	0.148012	-4.16348	3.1343e-05	0.000389095	CK
Zm00001eb021310	578.236	-0.615921	0.156706	-3.93043	8.47958e-05	0.000875028	CK
Zm00001eb002320	1227.6	-0.615832	0.12857	-4.78987	1.66894e-06	3.57149e-05	CK
Zm00001eb267620	117.937	-0.615563	0.174409	-3.52942	0.000416477	0.00318237	CK
Zm00001eb307400	601.483	-0.615247	0.130555	-4.71255	2.44635e-06	4.82171e-05	CK
Zm00001eb169340	311.505	-0.614577	0.192813	-3.18743	0.00143542	0.00861092	CK
Zm00001eb354820	351.851	-0.614556	0.110091	-5.58225	2.37429e-08	1.10068e-06	CK
Zm00001eb420220	468.364	-0.614551	0.166527	-3.69039	0.000223913	0.00194657	CK
Zm00001eb044500	150.501	-0.613929	0.194716	-3.15295	0.00161629	0.00948128	CK
Zm00001eb241790	217.105	-0.613453	0.223721	-2.74204	0.00610585	0.0271506	CK
Zm00001eb011050	1153.62	-0.612905	0.170253	-3.59995	0.000318273	0.00256627	CK
Zm00001eb215290	323.913	-0.612867	0.118716	-5.16244	2.43752e-07	7.64895e-06	CK
Zm00001eb065390	369.158	-0.612823	0.119481	-5.12903	2.91245e-07	8.77989e-06	CK
Zm00001eb389820	592.197	-0.612761	0.137616	-4.45269	8.48002e-06	0.000135616	CK
Zm00001eb325640	724.369	-0.612466	0.159197	-3.84722	0.000119464	0.00115608	CK
Zm00001eb032630	1088.86	-0.612284	0.191412	-3.19877	0.00138014	0.0083305	CK
Zm00001eb006350	390.741	-0.611927	0.178811	-3.4222	0.000621171	0.00438868	CK
Zm00001eb369650	459.713	-0.611813	0.123655	-4.94776	7.50734e-07	1.87369e-05	CK
Zm00001eb042270	162.17	-0.611777	0.21412	-2.85717	0.00427435	0.0204058	CK
Zm00001eb288420	1458.42	-0.611755	0.165589	-3.69442	0.000220393	0.00192063	CK
Zm00001eb343220	212.988	-0.611398	0.168208	-3.63477	0.000278228	0.00231288	CK
Zm00001eb272880	622.439	-0.611367	0.165359	-3.69721	0.000217982	0.00190673	CK
Zm00001eb081360	74.0267	-0.611333	0.216351	-2.82565	0.00471846	0.0220947	CK
Zm00001eb382650	758.774	-0.611092	0.155338	-3.93396	8.35575e-05	0.000864744	CK
Zm00001eb040550	595.504	-0.610805	0.184162	-3.31666	0.000910996	0.00597239	CK
Zm00001eb030730	693.75	-0.610704	0.211686	-2.88496	0.00391468	0.0190301	CK
Zm00001eb056440	277.664	-0.61008	0.181726	-3.35714	0.000787542	0.00530066	CK
Zm00001eb160390	135.897	-0.610059	0.227781	-2.67827	0.00740029	0.031642	CK
Zm00001eb150140	49.95	-0.610025	0.198772	-3.06896	0.00214804	0.0119105	CK
Zm00001eb010410	276.065	-0.609875	0.142282	-4.28638	1.81605e-05	0.000250835	CK
Zm00001eb135550	968.666	-0.609417	0.132736	-4.59121	4.40675e-06	7.81061e-05	CK
Zm00001eb338510	2782.19	-0.609144	0.194407	-3.13334	0.00172829	0.0100151	CK
Zm00001eb273940	4865.17	-0.609056	0.211974	-2.87326	0.00406256	0.0195908	CK
Zm00001eb171020	459.32	-0.608968	0.129839	-4.69019	2.72948e-06	5.27323e-05	CK
Zm00001eb394970	244.52	-0.608903	0.148989	-4.08689	4.37188e-05	0.000515027	CK
Zm00001eb248080	469.633	-0.608848	0.156184	-3.89828	9.68803e-05	0.000973976	CK
Zm00001eb379340	120.595	-0.608655	0.2383	-2.55415	0.0106446	0.0420767	CK
Zm00001eb296460	3568.51	-0.608505	0.122242	-4.97788	6.42841e-07	1.66559e-05	CK
Zm00001eb097940	691.972	-0.607831	0.11615	-5.23316	1.66639e-07	5.51117e-06	CK
Zm00001eb266370	2796.68	-0.607782	0.206877	-2.93789	0.00330456	0.0166071	CK
Zm00001eb213110	754.842	-0.607668	0.167232	-3.63369	0.000279396	0.0023199	CK
Zm00001eb045630	111.687	-0.607469	0.233547	-2.60106	0.0092936	0.0379163	CK
Zm00001eb157850	881.665	-0.607438	0.0933975	-6.50379	7.83187e-11	1.33866e-08	CK
Zm00001eb006720	160.09	-0.607103	0.191195	-3.1753	0.00149681	0.00890453	CK
Zm00001eb072360	677.462	-0.606756	0.222722	-2.72427	0.0064443	0.0282864	CK
Zm00001eb192690	218.165	-0.60655	0.169674	-3.5748	0.000350492	0.00277191	CK
Zm00001eb121910	73.6705	-0.6063	0.243534	-2.4896	0.0127888	0.0485575	CK
Zm00001eb024230	668.955	-0.606151	0.15042	-4.02971	5.58452e-05	0.000628888	CK
Zm00001eb097880	1007.67	-0.605427	0.20113	-3.01013	0.0026114	0.01385	CK
Zm00001eb399120	313.103	-0.605261	0.123815	-4.88842	1.01649e-06	2.40816e-05	CK
Zm00001eb399600	3802.33	-0.60485	0.174568	-3.46484	0.000530542	0.00386412	CK
Zm00001eb220600	118.174	-0.604577	0.226859	-2.66499	0.00769913	0.0326718	CK
Zm00001eb261740	230.309	-0.604549	0.161127	-3.75199	0.000175434	0.00159219	CK
Zm00001eb222280	69.6628	-0.604476	0.183526	-3.29368	0.000988845	0.00637566	CK
Zm00001eb239300	1136.26	-0.604458	0.133661	-4.52233	6.11616e-06	0.000103043	CK
Zm00001eb192480	412.178	-0.604431	0.185748	-3.25404	0.00113776	0.00713574	CK
Zm00001eb126820	1065.44	-0.604308	0.144235	-4.18974	2.79274e-05	0.000355114	CK
Zm00001eb288070	458.976	-0.603403	0.126761	-4.76017	1.93425e-06	3.97656e-05	CK
Zm00001eb022630	162.832	-0.6033	0.238897	-2.52536	0.0115581	0.0448532	CK
Zm00001eb375730	874.003	-0.602578	0.169066	-3.56415	0.000365037	0.00286373	CK
Zm00001eb423530	1132.61	-0.602148	0.168932	-3.56444	0.000364631	0.0028619	CK
Zm00001eb156690	670.996	-0.601826	0.145642	-4.13222	3.59274e-05	0.000435871	CK
Zm00001eb284140	970.163	-0.60135	0.129676	-4.63733	3.5294e-06	6.51937e-05	CK
Zm00001eb004170	435.1	-0.600964	0.137855	-4.35939	1.30425e-05	0.000192798	CK
Zm00001eb368340	50.7048	-0.600938	0.228487	-2.63008	0.00853645	0.0354403	CK
Zm00001eb334120	298.868	-0.600448	0.141215	-4.25202	2.11852e-05	0.000282083	CK
Zm00001eb017800	1418.79	-0.599673	0.129051	-4.64678	3.3715e-06	6.29784e-05	CK
Zm00001eb305330	626.773	-0.599573	0.176054	-3.40562	0.00066013	0.00460632	CK
Zm00001eb291070	707.331	-0.598799	0.18839	-3.17851	0.00148036	0.00882422	CK
Zm00001eb082470	272.107	-0.598694	0.129734	-4.6148	3.93477e-06	7.11507e-05	CK
Zm00001eb192250	166.659	-0.598616	0.151499	-3.95129	7.77312e-05	0.000817453	CK
Zm00001eb001930	1809.36	-0.598194	0.180371	-3.31646	0.00091166	0.0059731	CK
Zm00001eb238270	173.128	-0.59792	0.211254	-2.83034	0.00464982	0.0218574	CK
Zm00001eb316240	1049.45	-0.59767	0.135044	-4.42575	9.61093e-06	0.000149593	CK
Zm00001eb095350	1487.36	-0.597622	0.1194	-5.0052	5.58047e-07	1.48979e-05	CK
Zm00001eb200430	1022.84	-0.59751	0.146724	-4.07233	4.65456e-05	0.000542081	CK
Zm00001eb346860	925.048	-0.597417	0.167888	-3.55842	0.000373091	0.00291432	CK
Zm00001eb065460	366.393	-0.597398	0.118998	-5.02021	5.16146e-07	1.39528e-05	CK
Zm00001eb043630	332.893	-0.596965	0.15291	-3.90403	9.46033e-05	0.000955111	CK
Zm00001eb102830	365.156	-0.596297	0.102896	-5.79514	6.8265e-09	4.22259e-07	CK
Zm00001eb153780	156.442	-0.59607	0.212271	-2.80807	0.00498396	0.0230551	CK
Zm00001eb295060	244.799	-0.595939	0.199965	-2.98022	0.00288046	0.0149628	CK
Zm00001eb327800	2599.41	-0.595593	0.142393	-4.18273	2.8803e-05	0.000363664	CK
Zm00001eb340720	791.327	-0.595471	0.12726	-4.67917	2.88035e-06	5.51998e-05	CK
Zm00001eb025040	442.737	-0.595443	0.158004	-3.76854	0.000164205	0.00151201	CK
Zm00001eb309020	881.002	-0.594985	0.114248	-5.20783	1.91059e-07	6.19469e-06	CK
Zm00001eb156860	149.595	-0.594714	0.180926	-3.28706	0.00101241	0.00650338	CK
Zm00001eb416530	112.593	-0.594232	0.153376	-3.87435	0.00010691	0.00105504	CK
Zm00001eb130000	174.642	-0.594214	0.236197	-2.51576	0.0118777	0.0458695	CK
Zm00001eb195720	264.83	-0.593917	0.172279	-3.44742	0.000565974	0.0040738	CK
Zm00001eb138290	1437.62	-0.593863	0.147568	-4.02434	5.71347e-05	0.000640386	CK
Zm00001eb101220	499.803	-0.593619	0.12922	-4.59386	4.35125e-06	7.73779e-05	CK
Zm00001eb319660	1676.56	-0.593194	0.158924	-3.73258	0.00018953	0.00170284	CK
Zm00001eb285390	170.545	-0.592907	0.205548	-2.88452	0.00392012	0.0190495	CK
Zm00001eb075010	322.783	-0.592678	0.204034	-2.9048	0.00367485	0.0180455	CK
Zm00001eb076600	1880.69	-0.592577	0.142618	-4.15499	3.253e-05	0.000401739	CK
Zm00001eb104040	389.879	-0.592054	0.125141	-4.73108	2.23329e-06	4.46324e-05	CK
Zm00001eb295670	843.831	-0.591854	0.160944	-3.67739	0.000235629	0.00202185	CK
Zm00001eb347520	605.818	-0.591734	0.182693	-3.23896	0.00119966	0.0074399	CK
Zm00001eb160730	154.878	-0.591655	0.17893	-3.30662	0.000944281	0.00615115	CK
Zm00001eb151650	153.423	-0.590676	0.182622	-3.23443	0.00121888	0.00753948	CK
Zm00001eb015440	929.685	-0.590368	0.116006	-5.08913	3.59707e-07	1.05187e-05	CK
Zm00001eb390330	225.105	-0.590265	0.184109	-3.20607	0.00134562	0.0081658	CK
Zm00001eb110710	155.071	-0.590183	0.126654	-4.6598	3.1652e-06	5.99627e-05	CK
Zm00001eb084420	160.043	-0.590072	0.160238	-3.68246	0.000230991	0.00198717	CK
Zm00001eb167790	773.008	-0.589918	0.111519	-5.28985	1.22419e-07	4.32882e-06	CK
Zm00001eb061470	371.827	-0.589655	0.125907	-4.68326	2.82341e-06	5.43514e-05	CK
Zm00001eb250690	323.134	-0.589629	0.192197	-3.06784	0.00215611	0.0119376	CK
Zm00001eb044840	1580.33	-0.589466	0.130408	-4.52018	6.17865e-06	0.000104015	CK
Zm00001eb319350	344.158	-0.589408	0.14775	-3.98923	6.62869e-05	0.000721126	CK
Zm00001eb180800	144.635	-0.589334	0.198691	-2.96608	0.00301622	0.0155029	CK
Zm00001eb230830	416.639	-0.589316	0.163274	-3.60937	0.000306941	0.00249931	CK
Zm00001eb414700	154.214	-0.58831	0.152129	-3.86718	0.000110101	0.00108057	CK
Zm00001eb422860	292.05	-0.587856	0.186413	-3.15352	0.00161316	0.00946552	CK
Zm00001eb252620	122.757	-0.587831	0.227001	-2.58956	0.00960995	0.0389405	CK
Zm00001eb408490	182.303	-0.587655	0.121227	-4.84755	1.24997e-06	2.84682e-05	CK
Zm00001eb336090	763.152	-0.587513	0.1891	-3.10689	0.00189065	0.0107385	CK
Zm00001eb367290	354.868	-0.587509	0.172631	-3.40327	0.000665836	0.00463842	CK
Zm00001eb059550	114.012	-0.587469	0.21198	-2.77134	0.00558269	0.0252586	CK
Zm00001eb168000	178.386	-0.5873	0.157857	-3.72046	0.000198863	0.00176526	CK
Zm00001eb328970	1949.51	-0.587184	0.13755	-4.26887	1.96468e-05	0.000266392	CK
Zm00001eb008440	452.525	-0.587067	0.109087	-5.38165	7.38066e-08	2.81883e-06	CK
Zm00001eb403300	373.983	-0.587058	0.215509	-2.72405	0.00644866	0.0282997	CK
Zm00001eb427790	426.226	-0.587008	0.162692	-3.60809	0.000308465	0.00250791	CK
Zm00001eb036970	486.976	-0.586986	0.155893	-3.7653	0.000166346	0.00152649	CK
Zm00001eb030100	98.3891	-0.586297	0.190091	-3.08429	0.00204036	0.0114166	CK
Zm00001eb298060	661.365	-0.586157	0.160136	-3.66037	0.000251848	0.00213578	CK
Zm00001eb078490	167.607	-0.585851	0.198986	-2.94419	0.00323805	0.0163649	CK
Zm00001eb361610	1754.76	-0.585767	0.108106	-5.41843	6.01262e-08	2.3767e-06	CK
Zm00001eb343630	134.505	-0.58554	0.18553	-3.15605	0.00159924	0.0094044	CK
Zm00001eb289290	400.542	-0.585438	0.184569	-3.17191	0.00151439	0.00899169	CK
Zm00001eb164310	426.415	-0.585266	0.124392	-4.70502	2.53843e-06	4.98489e-05	CK
Zm00001eb115110	309.453	-0.58519	0.131925	-4.43578	9.17394e-06	0.000144256	CK
Zm00001eb003480	829.879	-0.584965	0.122528	-4.77414	1.80473e-06	3.79618e-05	CK
Zm00001eb095090	123.197	-0.584817	0.193949	-3.01531	0.00256716	0.0136728	CK
Zm00001eb298570	433.832	-0.584366	0.13409	-4.358	1.31256e-05	0.000193761	CK
Zm00001eb166710	732.568	-0.584237	0.103446	-5.64773	1.62579e-08	8.17233e-07	CK
Zm00001eb227020	150.945	-0.583923	0.229668	-2.54246	0.0110074	0.0431374	CK
Zm00001eb309660	519.356	-0.58389	0.161149	-3.62328	0.00029089	0.00240141	CK
Zm00001eb065380	240.738	-0.583498	0.228601	-2.55248	0.010696	0.0421942	CK
Zm00001eb156770	123.972	-0.583317	0.151711	-3.84491	0.000120595	0.00116302	CK
Zm00001eb423540	311.108	-0.583289	0.10486	-5.56255	2.65856e-08	1.20897e-06	CK
Zm00001eb336760	455.807	-0.583276	0.157125	-3.71218	0.000205481	0.0018135	CK
Zm00001eb054040	8605.61	-0.583187	0.164352	-3.5484	0.000387585	0.0030109	CK
Zm00001eb350310	154.263	-0.583125	0.141289	-4.12718	3.67244e-05	0.000443621	CK
Zm00001eb225060	122.765	-0.583024	0.215193	-2.70931	0.00674243	0.0293311	CK
Zm00001eb412800	120.784	-0.582962	0.17304	-3.36895	0.000754553	0.00512361	CK
Zm00001eb259280	495.557	-0.582857	0.144565	-4.03181	5.53487e-05	0.000625595	CK
Zm00001eb211300	737.452	-0.582795	0.194411	-2.99776	0.00271975	0.0142905	CK
Zm00001eb252380	425.478	-0.58271	0.18718	-3.1131	0.00185136	0.0105601	CK
Zm00001eb212760	547.037	-0.582504	0.110554	-5.26896	1.37201e-07	4.68929e-06	CK
Zm00001eb299920	283.353	-0.582499	0.210223	-2.77086	0.00559092	0.0252905	CK
Zm00001eb269510	382.946	-0.582259	0.136898	-4.25324	2.10699e-05	0.000280938	CK
Zm00001eb190530	367.067	-0.582205	0.160441	-3.62877	0.000284772	0.00235725	CK
Zm00001eb328490	835.81	-0.582052	0.103092	-5.64593	1.64295e-08	8.23933e-07	CK
Zm00001eb394290	501.628	-0.581683	0.18376	-3.16545	0.00154843	0.00917094	CK
Zm00001eb204990	378.52	-0.581539	0.213412	-2.72496	0.00643083	0.0282562	CK
Zm00001eb154520	220.232	-0.58135	0.135816	-4.28042	1.86537e-05	0.00025629	CK
Zm00001eb410170	2014.81	-0.581024	0.182014	-3.19219	0.00141198	0.00848975	CK
Zm00001eb012010	165.687	-0.58077	0.199465	-2.91164	0.00359533	0.0177729	CK
Zm00001eb283340	1231.73	-0.580674	0.133942	-4.33527	1.45584e-05	0.00021071	CK
Zm00001eb243570	438.202	-0.580499	0.152533	-3.80573	0.000141388	0.00133045	CK
Zm00001eb298670	77.7721	-0.580415	0.232133	-2.50036	0.0124067	0.0474855	CK
Zm00001eb363940	221.445	-0.580292	0.176643	-3.2851	0.00101944	0.00653537	CK
Zm00001eb020110	1877.71	-0.580291	0.13589	-4.2703	1.95208e-05	0.000265691	CK
Zm00001eb323970	183.791	-0.579991	0.153067	-3.78913	0.000151173	0.00140588	CK
Zm00001eb408790	533.51	-0.579832	0.114666	-5.05669	4.26586e-07	1.19689e-05	CK
Zm00001eb345570	423.189	-0.579817	0.146602	-3.95505	7.65178e-05	0.00080786	CK
Zm00001eb370810	268.84	-0.579675	0.147667	-3.92556	8.65283e-05	0.000889485	CK
Zm00001eb013190	1057.78	-0.579659	0.173462	-3.34172	0.000832621	0.00555875	CK
Zm00001eb234390	499.302	-0.579466	0.147619	-3.92543	8.65748e-05	0.000889537	CK
Zm00001eb035750	376.811	-0.579371	0.195987	-2.95617	0.00311481	0.0159068	CK
Zm00001eb085340	264.62	-0.579152	0.142375	-4.0678	4.74595e-05	0.000549741	CK
Zm00001eb354140	1365.28	-0.578879	0.130615	-4.43195	9.33848e-06	0.000146418	CK
Zm00001eb343820	521.777	-0.578663	0.15082	-3.83678	0.00012466	0.00119664	CK
Zm00001eb301050	467.521	-0.578566	0.160508	-3.6046	0.000312631	0.00253028	CK
Zm00001eb187710	440.535	-0.5784	0.117201	-4.9351	8.01109e-07	1.97417e-05	CK
Zm00001eb392430	225.225	-0.578326	0.133712	-4.32515	1.52428e-05	0.000219092	CK
Zm00001eb318760	135.226	-0.577535	0.154523	-3.73755	0.000185825	0.00167375	CK
Zm00001eb322310	224.941	-0.577506	0.192967	-2.99276	0.00276463	0.0144873	CK
Zm00001eb008150	102.496	-0.577347	0.176451	-3.27199	0.00106794	0.00678376	CK
Zm00001eb410350	940.082	-0.576953	0.17111	-3.37183	0.000746702	0.00508478	CK
Zm00001eb162740	363.799	-0.576692	0.168767	-3.41709	0.000632942	0.00444988	CK
Zm00001eb370150	121.818	-0.576314	0.205088	-2.81009	0.00495278	0.0229406	CK
Zm00001eb165590	1474.13	-0.575558	0.142347	-4.04334	5.26962e-05	0.000599401	CK
Zm00001eb154490	1835.08	-0.575155	0.193867	-2.96675	0.0030097	0.0154859	CK
Zm00001eb390210	418.4	-0.575044	0.193817	-2.96694	0.00300781	0.015482	CK
Zm00001eb401240	558.881	-0.574953	0.185699	-3.09616	0.00196046	0.0110648	CK
Zm00001eb102120	332.068	-0.574904	0.182295	-3.15371	0.00161209	0.00946439	CK
Zm00001eb019650	130.769	-0.57487	0.199529	-2.88113	0.0039625	0.0192029	CK
Zm00001eb034990	247.344	-0.574426	0.204294	-2.81176	0.00492714	0.0228464	CK
Zm00001eb054100	2473.86	-0.574351	0.177751	-3.23121	0.00123266	0.00761186	CK
Zm00001eb059370	338.519	-0.574291	0.162095	-3.54292	0.000395726	0.00306085	CK
Zm00001eb257410	128.797	-0.574239	0.193206	-2.97215	0.00295718	0.0152653	CK
Zm00001eb239990	630.247	-0.574126	0.156182	-3.67599	0.000236926	0.00203172	CK
Zm00001eb003830	963.614	-0.574085	0.189252	-3.03344	0.00241784	0.0130557	CK
Zm00001eb251930	771.141	-0.573838	0.115827	-4.95429	7.25965e-07	1.8246e-05	CK
Zm00001eb054050	889.499	-0.573838	0.176839	-3.24498	0.00117461	0.00732048	CK
Zm00001eb394700	1982.06	-0.573245	0.142136	-4.03307	5.50533e-05	0.000622584	CK
Zm00001eb125860	420.954	-0.573141	0.166213	-3.44824	0.00056426	0.00406555	CK
Zm00001eb185250	813.785	-0.573063	0.143326	-3.99833	6.37916e-05	0.000699654	CK
Zm00001eb219790	497.175	-0.573062	0.23049	-2.48628	0.0129087	0.0488577	CK
Zm00001eb237390	476.589	-0.57291	0.129071	-4.43873	9.04895e-06	0.000142709	CK
Zm00001eb035040	95.4881	-0.572813	0.170125	-3.36701	0.000759888	0.00514681	CK
Zm00001eb279370	830.863	-0.572443	0.206019	-2.7786	0.00545943	0.0248318	CK
Zm00001eb347630	138.443	-0.572197	0.206804	-2.76686	0.00565998	0.0255437	CK
Zm00001eb084570	116.855	-0.571982	0.218296	-2.62021	0.00878751	0.036307	CK
Zm00001eb134010	198.002	-0.571949	0.142369	-4.01737	5.88502e-05	0.000656187	CK
Zm00001eb146420	318.948	-0.571462	0.119547	-4.78023	1.75099e-06	3.70643e-05	CK
Zm00001eb213200	373.069	-0.571447	0.126926	-4.50222	6.72479e-06	0.00011146	CK
Zm00001eb404750	327.72	-0.571289	0.159555	-3.58052	0.000342911	0.00272703	CK
Zm00001eb185530	151.805	-0.571207	0.144795	-3.94495	7.98178e-05	0.00083612	CK
Zm00001eb183830	241.774	-0.570884	0.111971	-5.09851	3.42336e-07	1.00933e-05	CK
Zm00001eb183600	435.725	-0.570677	0.144048	-3.96172	7.44114e-05	0.000792221	CK
Zm00001eb293820	289.687	-0.570517	0.174107	-3.27681	0.00104985	0.00669511	CK
Zm00001eb394840	778.226	-0.570419	0.162464	-3.51106	0.000446323	0.0033649	CK
Zm00001eb267080	239.99	-0.570325	0.157732	-3.61579	0.000299428	0.00245396	CK
Zm00001eb203820	118.463	-0.570176	0.209377	-2.7232	0.00646522	0.0283486	CK
Zm00001eb171190	354.298	-0.569852	0.156959	-3.63059	0.000282772	0.00234431	CK
Zm00001eb221680	860.523	-0.569772	0.111304	-5.11904	3.07089e-07	9.16739e-06	CK
Zm00001eb217890	533.707	-0.569529	0.190419	-2.99093	0.00278129	0.0145497	CK
Zm00001eb357010	552.763	-0.569507	0.157605	-3.6135	0.000302093	0.0024691	CK
Zm00001eb320760	609.043	-0.569461	0.169935	-3.35104	0.000805078	0.00540175	CK
Zm00001eb217190	445.928	-0.569226	0.149725	-3.80182	0.000143636	0.0013492	CK
Zm00001eb353840	297.037	-0.568867	0.117346	-4.84779	1.24846e-06	2.84682e-05	CK
Zm00001eb411460	209.205	-0.568739	0.179935	-3.1608	0.00157335	0.00927246	CK
Zm00001eb015050	116.738	-0.568704	0.188829	-3.01174	0.00259759	0.0137938	CK
Zm00001eb146080	434.984	-0.56859	0.119008	-4.77774	1.77279e-06	3.7452e-05	CK
Zm00001eb054020	110.178	-0.568534	0.207754	-2.73657	0.00620825	0.027478	CK
Zm00001eb042410	832.975	-0.568428	0.173161	-3.28266	0.00102834	0.00658087	CK
Zm00001eb323050	54.0932	-0.568162	0.222531	-2.55318	0.0106744	0.0421633	CK
Zm00001eb112990	337.477	-0.568102	0.187012	-3.03777	0.00238332	0.0129148	CK
Zm00001eb284310	2443.16	-0.568088	0.109569	-5.18477	2.16284e-07	6.90821e-06	CK
Zm00001eb381220	143.268	-0.568037	0.138576	-4.09911	4.14742e-05	0.000492368	CK
Zm00001eb212150	695.411	-0.567695	0.14284	-3.97435	7.05724e-05	0.000759281	CK
Zm00001eb127680	148.846	-0.567476	0.218118	-2.60169	0.00927651	0.0378671	CK
Zm00001eb244220	581.763	-0.567006	0.133364	-4.25158	2.12267e-05	0.000282286	CK
Zm00001eb073750	263.996	-0.566824	0.166296	-3.40853	0.000653143	0.00456746	CK
Zm00001eb010360	623.463	-0.566181	0.118665	-4.77126	1.83074e-06	3.83367e-05	CK
Zm00001eb177880	336.152	-0.566041	0.203932	-2.77564	0.00550933	0.0249952	CK
Zm00001eb335800	179.178	-0.56591	0.18974	-2.98255	0.00285856	0.0148814	CK
Zm00001eb078570	816.671	-0.565574	0.197348	-2.86586	0.00415872	0.0199505	CK
Zm00001eb434400	363.718	-0.565346	0.137641	-4.10738	4.0017e-05	0.000476916	CK
Zm00001eb285830	1006.32	-0.564959	0.166917	-3.38467	0.000712649	0.00490037	CK
Zm00001eb388270	189.162	-0.564625	0.163271	-3.4582	0.000543788	0.00394054	CK
Zm00001eb061180	576.184	-0.564405	0.0972339	-5.80461	6.45159e-09	4.02549e-07	CK
Zm00001eb139880	238.768	-0.564367	0.180981	-3.11837	0.00181854	0.0104283	CK
Zm00001eb406410	1675.48	-0.563898	0.120582	-4.67645	2.91879e-06	5.56879e-05	CK
Zm00001eb058950	1340.41	-0.56374	0.113705	-4.95791	7.12539e-07	1.79929e-05	CK
Zm00001eb159090	179.436	-0.563478	0.208136	-2.70725	0.00678424	0.0294712	CK
Zm00001eb020660	1431.73	-0.563455	0.15203	-3.7062	0.000210394	0.00184885	CK
Zm00001eb257640	1869.32	-0.563202	0.134142	-4.19855	2.68633e-05	0.000343078	CK
Zm00001eb062360	835.196	-0.562935	0.154545	-3.64252	0.000269981	0.00225921	CK
Zm00001eb150370	503.444	-0.562644	0.0996639	-5.64542	1.64781e-08	8.24443e-07	CK
Zm00001eb259370	284.976	-0.562575	0.175221	-3.21066	0.00132429	0.00807518	CK
Zm00001eb143540	766.513	-0.562091	0.20577	-2.73165	0.00630177	0.0278086	CK
Zm00001eb198830	161.774	-0.56191	0.180304	-3.11646	0.00183038	0.0104774	CK
Zm00001eb377430	477.916	-0.561891	0.132117	-4.25298	2.1094e-05	0.000281044	CK
Zm00001eb327820	642.186	-0.561745	0.218309	-2.57316	0.0100774	0.0403515	CK
Zm00001eb081280	390.249	-0.561676	0.188441	-2.98064	0.00287646	0.0149492	CK
Zm00001eb296200	190.967	-0.561597	0.172276	-3.25986	0.00111466	0.0070182	CK
Zm00001eb268830	3120.34	-0.561439	0.145709	-3.85316	0.000116604	0.00113197	CK
Zm00001eb047260	96.5827	-0.561149	0.184742	-3.03747	0.00238576	0.0129248	CK
Zm00001eb341220	392.272	-0.561137	0.125314	-4.47785	7.5398e-06	0.000122509	CK
Zm00001eb061800	261.501	-0.561092	0.188576	-2.97542	0.00292588	0.0151317	CK
Zm00001eb397770	151.245	-0.560909	0.154511	-3.63022	0.000283178	0.00234496	CK
Zm00001eb223050	709.867	-0.560833	0.19848	-2.82564	0.00471869	0.0220947	CK
Zm00001eb146160	151.778	-0.560593	0.168644	-3.32413	0.000886954	0.00584677	CK
Zm00001eb405030	508.149	-0.5601	0.180322	-3.10611	0.00189567	0.0107614	CK
Zm00001eb410330	149.057	-0.559887	0.140515	-3.98452	6.76156e-05	0.000733351	CK
Zm00001eb419470	174.76	-0.558233	0.149174	-3.74215	0.000182453	0.00164753	CK
Zm00001eb317780	450.422	-0.558229	0.125864	-4.43516	9.20034e-06	0.000144565	CK
Zm00001eb127750	391.123	-0.557961	0.137796	-4.04919	5.13956e-05	0.000587723	CK
Zm00001eb226650	736.128	-0.557549	0.102219	-5.45447	4.91199e-08	2.0019e-06	CK
Zm00001eb105000	945.234	-0.557435	0.123187	-4.52513	6.03582e-06	0.00010185	CK
Zm00001eb215850	110.872	-0.557431	0.19637	-2.83867	0.00453013	0.0214221	CK
Zm00001eb212580	138.476	-0.556794	0.154805	-3.59674	0.000322231	0.00259312	CK
Zm00001eb091780	1880.24	-0.556413	0.096781	-5.7492	8.96686e-09	5.11874e-07	CK
Zm00001eb101280	532.209	-0.556146	0.159016	-3.49742	0.000469784	0.00349791	CK
Zm00001eb037690	1011.21	-0.556107	0.212484	-2.61718	0.00886606	0.0365612	CK
Zm00001eb224870	52.5841	-0.556055	0.216764	-2.56525	0.0103101	0.0410773	CK
Zm00001eb201330	1101.28	-0.555948	0.140112	-3.96788	7.25156e-05	0.00077746	CK
Zm00001eb269450	412.957	-0.555867	0.145203	-3.82819	0.000129086	0.00123252	CK
Zm00001eb016620	540.124	-0.555774	0.189657	-2.93041	0.00338511	0.0169246	CK
Zm00001eb096510	816.957	-0.555732	0.130426	-4.2609	2.0361e-05	0.000273827	CK
Zm00001eb085680	1091.94	-0.555527	0.1251	-4.44066	8.9684e-06	0.000141751	CK
Zm00001eb165490	155.176	-0.555336	0.17825	-3.11549	0.0018364	0.0105055	CK
Zm00001eb101080	89.6777	-0.555253	0.176785	-3.14084	0.00168463	0.0098178	CK
Zm00001eb358430	180.269	-0.555118	0.157161	-3.53216	0.000412172	0.00315734	CK
Zm00001eb212570	251.693	-0.555016	0.145574	-3.81259	0.000137516	0.00129913	CK
Zm00001eb076650	207.958	-0.554989	0.134716	-4.11969	3.79384e-05	0.000455492	CK
Zm00001eb402720	317.445	-0.554875	0.119837	-4.63023	3.65262e-06	6.71231e-05	CK
Zm00001eb374120	210.442	-0.554869	0.136822	-4.05542	5.00448e-05	0.000575033	CK
Zm00001eb412280	127.594	-0.554588	0.177836	-3.11854	0.00181748	0.010425	CK
Zm00001eb233720	869.891	-0.554497	0.127044	-4.36462	1.27347e-05	0.000188899	CK
Zm00001eb032750	269.891	-0.554466	0.164107	-3.37869	0.00072833	0.00498974	CK
Zm00001eb425300	229.945	-0.554398	0.155728	-3.56005	0.000370784	0.00289927	CK
Zm00001eb333940	192.743	-0.553366	0.191156	-2.89484	0.00379348	0.0185409	CK
Zm00001eb108100	105.815	-0.553347	0.171956	-3.21796	0.00129105	0.00789939	CK
Zm00001eb009980	116.308	-0.553236	0.13274	-4.16783	3.07518e-05	0.000382676	CK
Zm00001eb378640	1225.69	-0.553146	0.135859	-4.07147	4.67169e-05	0.000543398	CK
Zm00001eb258590	446.765	-0.552962	0.155636	-3.55293	0.000380965	0.00296807	CK
Zm00001eb082730	137.528	-0.552615	0.190719	-2.89754	0.00376106	0.0184099	CK
Zm00001eb253030	1058.49	-0.552335	0.135232	-4.08436	4.41981e-05	0.000519818	CK
Zm00001eb298150	113.796	-0.552095	0.175302	-3.14939	0.00163611	0.00956971	CK
Zm00001eb250210	1075.18	-0.551369	0.124273	-4.43676	9.13219e-06	0.00014381	CK
Zm00001eb375250	231.472	-0.551351	0.161331	-3.41751	0.000631961	0.00444735	CK
Zm00001eb332700	337.073	-0.550791	0.139575	-3.9462	7.94024e-05	0.000832581	CK
Zm00001eb067370	1049.77	-0.550144	0.170902	-3.21906	0.0012861	0.00787135	CK
Zm00001eb202360	194.178	-0.550053	0.151231	-3.63716	0.000275659	0.00229607	CK
Zm00001eb414270	91.9589	-0.549544	0.161532	-3.40207	0.000668781	0.00465307	CK
Zm00001eb288760	321.281	-0.549398	0.174436	-3.14957	0.00163509	0.00956803	CK
Zm00001eb322290	977.333	-0.549388	0.113274	-4.85007	1.23421e-06	2.82722e-05	CK
Zm00001eb350640	448.8	-0.549085	0.204392	-2.68643	0.00722193	0.0310147	CK
Zm00001eb417480	1830	-0.549007	0.17721	-3.09806	0.00194794	0.0110086	CK
Zm00001eb153710	1417.23	-0.548792	0.119761	-4.5824	4.5966e-06	8.06716e-05	CK
Zm00001eb159980	188.95	-0.547963	0.21152	-2.5906	0.00958092	0.0388669	CK
Zm00001eb344070	75.2247	-0.547871	0.160327	-3.41722	0.000632648	0.00444988	CK
Zm00001eb112690	4345.75	-0.547652	0.119819	-4.57066	4.86201e-06	8.43639e-05	CK
Zm00001eb420010	150.404	-0.547511	0.191949	-2.85238	0.00433928	0.0206698	CK
Zm00001eb191920	962.144	-0.547286	0.0959166	-5.70586	1.15758e-08	6.18392e-07	CK
Zm00001eb074120	224.039	-0.546558	0.167129	-3.27028	0.00107442	0.00681484	CK
Zm00001eb376160	663.707	-0.54653	0.167202	-3.26868	0.00108049	0.00684525	CK
Zm00001eb068530	637.943	-0.546425	0.139351	-3.92121	8.81047e-05	0.000903094	CK
Zm00001eb289990	289.565	-0.546372	0.207348	-2.63504	0.00841264	0.0350551	CK
Zm00001eb175200	1951.87	-0.546355	0.0905524	-6.03358	1.60371e-09	1.30622e-07	CK
Zm00001eb067620	900.965	-0.546114	0.147123	-3.71197	0.000205656	0.00181391	CK
Zm00001eb124530	162.972	-0.545979	0.202045	-2.70226	0.00688704	0.0298211	CK
Zm00001eb137060	888.746	-0.545975	0.101234	-5.3932	6.92152e-08	2.67201e-06	CK
Zm00001eb348730	428.329	-0.545542	0.0879799	-6.20076	5.619e-10	5.74315e-08	CK
Zm00001eb253820	2939.66	-0.545527	0.1546	-3.52862	0.00041773	0.0031908	CK
Zm00001eb061820	3750.24	-0.545442	0.174732	-3.12159	0.00179876	0.0103342	CK
Zm00001eb433550	196.308	-0.545412	0.16354	-3.33504	0.00085287	0.00566224	CK
Zm00001eb157900	1180.48	-0.54496	0.122653	-4.44312	8.86649e-06	0.000140585	CK
Zm00001eb335930	114.271	-0.544952	0.181603	-3.00079	0.00269282	0.0141698	CK
Zm00001eb243540	131.019	-0.544665	0.175867	-3.09702	0.00195474	0.0110383	CK
Zm00001eb324630	1411.18	-0.544271	0.12867	-4.22998	2.33716e-05	0.000306631	CK
Zm00001eb380850	1226.69	-0.544149	0.161426	-3.37089	0.000749255	0.00509893	CK
Zm00001eb037520	1112.75	-0.543966	0.185223	-2.93682	0.00331595	0.0166527	CK
Zm00001eb266620	938.706	-0.542926	0.154037	-3.52464	0.000424059	0.00322995	CK
Zm00001eb033030	5261.17	-0.542842	0.125775	-4.31598	1.58898e-05	0.000226016	CK
Zm00001eb374270	205.078	-0.5424	0.180373	-3.0071	0.00263755	0.0139508	CK
Zm00001eb195180	276.238	-0.54231	0.159599	-3.39795	0.000678939	0.00471	CK
Zm00001eb118930	2152.41	-0.542131	0.172093	-3.15023	0.00163143	0.00955651	CK
Zm00001eb190150	156.139	-0.542075	0.134819	-4.02076	5.80103e-05	0.000648169	CK
Zm00001eb349010	2993.79	-0.541817	0.176604	-3.06797	0.00215516	0.0119376	CK
Zm00001eb015720	217.321	-0.541691	0.197688	-2.74013	0.00614158	0.0272448	CK
Zm00001eb127080	5369.64	-0.541399	0.160599	-3.37113	0.000748606	0.00509612	CK
Zm00001eb041430	235.228	-0.541268	0.185415	-2.91923	0.003509	0.0174399	CK
Zm00001eb123150	837.172	-0.540238	0.173589	-3.11216	0.00185724	0.0105908	CK
Zm00001eb260970	617.312	-0.539788	0.17759	-3.03953	0.0023695	0.0128644	CK
Zm00001eb024870	333.25	-0.539766	0.14596	-3.69803	0.000217276	0.00190274	CK
Zm00001eb043650	3126.7	-0.539713	0.186516	-2.89366	0.00380779	0.0185878	CK
Zm00001eb205990	1474.11	-0.539668	0.0894485	-6.03328	1.60661e-09	1.30622e-07	CK
Zm00001eb144580	102.108	-0.53932	0.203939	-2.64452	0.0081806	0.0342478	CK
Zm00001eb082680	180.96	-0.539023	0.152447	-3.5358	0.00040655	0.00312655	CK
Zm00001eb155860	186.182	-0.538984	0.187371	-2.87656	0.00402031	0.0194045	CK
Zm00001eb226390	105.17	-0.538926	0.128037	-4.20916	2.56327e-05	0.000329647	CK
Zm00001eb141890	530.894	-0.538671	0.118663	-4.53952	5.63837e-06	9.61255e-05	CK
Zm00001eb044740	679.767	-0.538431	0.0926272	-5.81289	6.14049e-09	3.86509e-07	CK
Zm00001eb386260	105.165	-0.538138	0.179451	-2.99881	0.00271034	0.0142455	CK
Zm00001eb398060	120.077	-0.538117	0.185889	-2.89483	0.00379362	0.0185409	CK
Zm00001eb149850	197.704	-0.538095	0.136001	-3.95656	7.60358e-05	0.000804353	CK
Zm00001eb418410	320.612	-0.538043	0.162967	-3.30155	0.000961515	0.00624447	CK
Zm00001eb143270	571.934	-0.538027	0.143736	-3.74318	0.000181709	0.0016415	CK
Zm00001eb223950	439.734	-0.537642	0.117619	-4.57104	4.85308e-06	8.42771e-05	CK
Zm00001eb334600	128.024	-0.53754	0.160388	-3.35151	0.000803734	0.00539442	CK
Zm00001eb195590	388.901	-0.537376	0.190041	-2.82769	0.00468848	0.0219964	CK
Zm00001eb084350	123.33	-0.537293	0.143604	-3.7415	0.000182926	0.00165041	CK
Zm00001eb363960	434.917	-0.537279	0.150734	-3.56441	0.000364671	0.0028619	CK
Zm00001eb316640	143.782	-0.537137	0.166516	-3.22573	0.00125651	0.00773215	CK
Zm00001eb272650	1218.87	-0.53702	0.13187	-4.07235	4.65414e-05	0.000542081	CK
Zm00001eb410510	1121.24	-0.53689	0.10255	-5.23542	1.64611e-07	5.4609e-06	CK
Zm00001eb027920	566.204	-0.536854	0.189827	-2.82812	0.00468224	0.0219742	CK
Zm00001eb098860	288.009	-0.536813	0.178035	-3.01521	0.00256802	0.013674	CK
Zm00001eb290310	213.69	-0.536724	0.167659	-3.20128	0.00136819	0.00828402	CK
Zm00001eb409040	615.688	-0.536661	0.168176	-3.19106	0.0014175	0.0085177	CK
Zm00001eb176760	223.376	-0.536231	0.195636	-2.74096	0.006126	0.0272064	CK
Zm00001eb067750	2406.98	-0.536038	0.150479	-3.5622	0.000367759	0.00287982	CK
Zm00001eb403110	410.252	-0.536009	0.133586	-4.01247	6.00865e-05	0.00066893	CK
Zm00001eb276280	1251.02	-0.535827	0.133299	-4.01974	5.82636e-05	0.000650323	CK
Zm00001eb185920	100.531	-0.535289	0.210371	-2.5445	0.0109434	0.0429355	CK
Zm00001eb285660	1324.18	-0.535107	0.176836	-3.026	0.00247808	0.013314	CK
Zm00001eb036910	142.602	-0.534752	0.168535	-3.17294	0.00150905	0.00896739	CK
Zm00001eb353340	632.594	-0.534491	0.123664	-4.32211	1.54546e-05	0.00022144	CK
Zm00001eb003030	138.228	-0.534282	0.182454	-2.9283	0.00340816	0.0170241	CK
Zm00001eb077470	101.934	-0.534131	0.214529	-2.48979	0.0127818	0.0485488	CK
Zm00001eb009660	140.92	-0.533954	0.209581	-2.54772	0.0108428	0.0426324	CK
Zm00001eb282300	95.5593	-0.533953	0.170758	-3.12697	0.00176621	0.0101908	CK
Zm00001eb311560	1329.51	-0.533903	0.143149	-3.7297	0.000191708	0.00171665	CK
Zm00001eb250740	150.025	-0.533891	0.174047	-3.06751	0.00215849	0.0119438	CK
Zm00001eb166460	694.041	-0.533303	0.120062	-4.44189	8.91733e-06	0.00014125	CK
Zm00001eb374360	130.326	-0.533264	0.157143	-3.3935	0.000690043	0.00477469	CK
Zm00001eb074890	674.284	-0.532796	0.141146	-3.77478	0.000160149	0.00147911	CK
Zm00001eb118330	314.263	-0.532737	0.112815	-4.7222	2.33303e-06	4.63238e-05	CK
Zm00001eb336390	509.798	-0.53248	0.115017	-4.62959	3.66382e-06	6.72139e-05	CK
Zm00001eb378700	164.683	-0.532447	0.164633	-3.23414	0.00122012	0.00754496	CK
Zm00001eb136840	1196.46	-0.532019	0.154688	-3.43931	0.000583202	0.00418299	CK
Zm00001eb054130	269.753	-0.53187	0.199602	-2.66466	0.00770669	0.0326786	CK
Zm00001eb340790	715.11	-0.531702	0.132873	-4.00157	6.29234e-05	0.000692609	CK
Zm00001eb057580	2185.28	-0.531656	0.114978	-4.62397	3.76464e-06	6.86528e-05	CK
Zm00001eb034760	614.04	-0.531627	0.109653	-4.84825	1.24555e-06	2.84682e-05	CK
Zm00001eb403980	643.368	-0.531499	0.124735	-4.26101	2.03508e-05	0.000273827	CK
Zm00001eb143430	287.088	-0.531198	0.139055	-3.82007	0.000133415	0.00126889	CK
Zm00001eb225620	213.471	-0.531028	0.148808	-3.56854	0.000358972	0.00282441	CK
Zm00001eb287830	361.674	-0.530874	0.134657	-3.94241	8.06673e-05	0.000841732	CK
Zm00001eb063900	347.397	-0.530859	0.146916	-3.61335	0.000302264	0.0024691	CK
Zm00001eb111020	856.321	-0.530824	0.120435	-4.40756	1.04543e-05	0.000161085	CK
Zm00001eb313960	237.581	-0.530764	0.116136	-4.5702	4.87262e-06	8.44797e-05	CK
Zm00001eb046040	178.309	-0.530529	0.138631	-3.82691	0.000129762	0.00123843	CK
Zm00001eb153610	215.474	-0.530487	0.179839	-2.94979	0.0031799	0.0161546	CK
Zm00001eb145890	884.462	-0.530485	0.172214	-3.08038	0.00206737	0.0115347	CK
Zm00001eb367310	574.13	-0.530459	0.172561	-3.07404	0.0021118	0.0117581	CK
Zm00001eb310220	290.555	-0.530413	0.179905	-2.94829	0.00319538	0.0162141	CK
Zm00001eb097300	491.661	-0.530114	0.0863132	-6.14175	8.16152e-10	7.68329e-08	CK
Zm00001eb239520	490.734	-0.52987	0.157025	-3.37443	0.000739678	0.00504976	CK
Zm00001eb136980	1317.88	-0.529573	0.139418	-3.79847	0.000145592	0.00136403	CK
Zm00001eb173330	379.147	-0.528995	0.159844	-3.30945	0.000934786	0.00610598	CK
Zm00001eb314690	551.643	-0.528841	0.14045	-3.76533	0.000166329	0.00152649	CK
Zm00001eb095230	1498.57	-0.528539	0.166255	-3.17908	0.00147744	0.00881617	CK
Zm00001eb320300	393.605	-0.528436	0.159178	-3.31977	0.000900916	0.00592078	CK
Zm00001eb432160	406.533	-0.528334	0.188922	-2.79657	0.00516479	0.0237229	CK
Zm00001eb085240	288.474	-0.528309	0.171309	-3.08395	0.0020427	0.0114268	CK
Zm00001eb269440	604.499	-0.528177	0.110864	-4.7642	1.89606e-06	3.9245e-05	CK
Zm00001eb191710	209.069	-0.528167	0.182031	-2.90153	0.00371351	0.0182104	CK
Zm00001eb033190	193.195	-0.528061	0.132038	-3.99932	6.35247e-05	0.00069744	CK
Zm00001eb282260	974.255	-0.527796	0.187019	-2.82215	0.00477026	0.0222778	CK
Zm00001eb157570	201.454	-0.527766	0.137389	-3.84139	0.000122339	0.00117647	CK
Zm00001eb307270	1976.36	-0.527758	0.17482	-3.01887	0.00253717	0.0135602	CK
Zm00001eb402010	127.108	-0.527758	0.188793	-2.79544	0.00518298	0.023781	CK
Zm00001eb061550	159.045	-0.527613	0.184956	-2.85264	0.00433579	0.0206594	CK
Zm00001eb043440	416.993	-0.527443	0.158138	-3.33533	0.000851991	0.00565815	CK
Zm00001eb119140	743.255	-0.527414	0.0931708	-5.66073	1.50732e-08	7.68484e-07	CK
Zm00001eb130210	398.265	-0.527385	0.163664	-3.22235	0.00127142	0.00780376	CK
Zm00001eb240940	743.881	-0.527222	0.121342	-4.34491	1.3933e-05	0.000203302	CK
Zm00001eb287250	793.807	-0.527191	0.134918	-3.90748	9.32619e-05	0.000944233	CK
Zm00001eb169910	364.251	-0.527095	0.123832	-4.25653	2.07625e-05	0.000277488	CK
Zm00001eb189900	949.209	-0.526792	0.182926	-2.87982	0.00397907	0.0192613	CK
Zm00001eb142150	362.322	-0.526693	0.204523	-2.57523	0.0100175	0.0401897	CK
Zm00001eb104640	63.2379	-0.52634	0.211475	-2.4889	0.0128138	0.0486134	CK
Zm00001eb289450	220.903	-0.52634	0.171707	-3.06534	0.0021742	0.0119975	CK
Zm00001eb003020	397.027	-0.526146	0.147168	-3.57513	0.000350055	0.00277152	CK
Zm00001eb057400	377.091	-0.525147	0.1886	-2.78445	0.00536192	0.0244557	CK
Zm00001eb379510	115.742	-0.524539	0.202255	-2.59345	0.00950196	0.0386123	CK
Zm00001eb291170	93.8208	-0.524457	0.209971	-2.49776	0.0124981	0.0477167	CK
Zm00001eb175500	348.969	-0.523948	0.153202	-3.41997	0.000626272	0.00441885	CK
Zm00001eb184160	85.7695	-0.523306	0.20029	-2.61274	0.00898198	0.0369469	CK
Zm00001eb104070	163.21	-0.523265	0.199627	-2.62121	0.00876171	0.0362144	CK
Zm00001eb347450	263.586	-0.52322	0.118316	-4.42222	9.76913e-06	0.000151725	CK
Zm00001eb388020	321.441	-0.523025	0.177902	-2.93995	0.00328262	0.0165201	CK
Zm00001eb123690	594.916	-0.523024	0.143701	-3.63967	0.000272992	0.00227846	CK
Zm00001eb055280	269.092	-0.522994	0.187726	-2.78594	0.00533721	0.0243584	CK
Zm00001eb053680	236.575	-0.522972	0.190533	-2.74478	0.00605511	0.0269572	CK
Zm00001eb196980	211	-0.522739	0.160458	-3.2578	0.00112279	0.00705493	CK
Zm00001eb286460	627.977	-0.522695	0.16835	-3.10482	0.00190393	0.010794	CK
Zm00001eb334320	277.232	-0.522392	0.111068	-4.70335	2.55921e-06	5.01652e-05	CK
Zm00001eb301140	601.186	-0.52238	0.154924	-3.37185	0.000746665	0.00508478	CK
Zm00001eb148980	224.243	-0.522018	0.127522	-4.09356	4.24796e-05	0.000502914	CK
Zm00001eb036920	1839.85	-0.521993	0.109339	-4.77408	1.80531e-06	3.79618e-05	CK
Zm00001eb215180	117.746	-0.521918	0.173076	-3.01554	0.00256523	0.0136727	CK
Zm00001eb167370	342.283	-0.52191	0.121766	-4.28619	1.81766e-05	0.000250895	CK
Zm00001eb115800	315.083	-0.521523	0.139177	-3.7472	0.000178823	0.00161815	CK
Zm00001eb152940	140.5	-0.521433	0.17024	-3.06292	0.00219185	0.0120772	CK
Zm00001eb228340	433.014	-0.521099	0.172628	-3.01863	0.00253922	0.0135678	CK
Zm00001eb328590	600.462	-0.520769	0.112179	-4.6423	3.44554e-06	6.3975e-05	CK
Zm00001eb225000	321.784	-0.52071	0.117231	-4.44174	8.92352e-06	0.00014125	CK
Zm00001eb188550	336.935	-0.520452	0.123449	-4.21592	2.48762e-05	0.000322041	CK
Zm00001eb076540	1223.63	-0.520408	0.163026	-3.19217	0.00141206	0.00848975	CK
Zm00001eb173700	260.128	-0.519952	0.158188	-3.28692	0.0010129	0.00650338	CK
Zm00001eb233420	180.884	-0.519843	0.181582	-2.86285	0.00419847	0.0200972	CK
Zm00001eb343680	1102.06	-0.519542	0.154212	-3.369	0.000754413	0.00512361	CK
Zm00001eb085820	113.855	-0.519525	0.197202	-2.63448	0.00842664	0.0351066	CK
Zm00001eb360180	125.11	-0.519471	0.15853	-3.27679	0.00104993	0.00669511	CK
Zm00001eb335690	278.346	-0.519291	0.118927	-4.36647	1.26272e-05	0.000187825	CK
Zm00001eb063280	128.528	-0.519148	0.14492	-3.58229	0.00034059	0.00271057	CK
Zm00001eb227130	626.181	-0.518471	0.150292	-3.44976	0.000561079	0.00404535	CK
Zm00001eb204180	669.317	-0.517676	0.148557	-3.4847	0.000492687	0.00363331	CK
Zm00001eb347040	232.328	-0.517464	0.179834	-2.87745	0.00400904	0.0193654	CK
Zm00001eb105020	384.899	-0.517388	0.126508	-4.08977	4.31794e-05	0.000509917	CK
Zm00001eb001810	253.123	-0.517332	0.165653	-3.12299	0.00179023	0.0102935	CK
Zm00001eb009240	127.876	-0.517026	0.161527	-3.20087	0.00137014	0.00828878	CK
Zm00001eb404990	247.639	-0.516846	0.144735	-3.57099	0.000355636	0.00280535	CK
Zm00001eb306210	2227.78	-0.516671	0.139225	-3.71107	0.000206388	0.00181852	CK
Zm00001eb156930	149.844	-0.516236	0.170474	-3.02824	0.00245984	0.0132345	CK
Zm00001eb225360	125.552	-0.515803	0.140774	-3.66406	0.000248251	0.00211235	CK
Zm00001eb244120	1312.3	-0.515219	0.197595	-2.60745	0.00912203	0.0373798	CK
Zm00001eb389830	253.22	-0.514814	0.139527	-3.6897	0.000224522	0.00195073	CK
Zm00001eb394190	100.798	-0.514718	0.195207	-2.63678	0.00836975	0.0349224	CK
Zm00001eb315340	676.744	-0.514668	0.127332	-4.04192	5.30149e-05	0.000602389	CK
Zm00001eb112360	794.702	-0.514613	0.18527	-2.77764	0.00547548	0.0248889	CK
Zm00001eb234730	4682.82	-0.514567	0.155586	-3.30727	0.000942086	0.00614058	CK
Zm00001eb135920	480.756	-0.514535	0.0980843	-5.24585	1.55566e-07	5.20103e-06	CK
Zm00001eb075200	506.892	-0.514425	0.143537	-3.58392	0.000338475	0.00269618	CK
Zm00001eb128330	2939.99	-0.514277	0.154068	-3.33799	0.000843856	0.00561454	CK
Zm00001eb349080	261.872	-0.514266	0.189721	-2.71065	0.00671522	0.0292364	CK
Zm00001eb019130	143.922	-0.514239	0.177363	-2.89935	0.00373932	0.018316	CK
Zm00001eb348660	183.399	-0.514153	0.145116	-3.54305	0.000395532	0.00306045	CK
Zm00001eb178620	153.649	-0.513768	0.154875	-3.31731	0.00090888	0.00596399	CK
Zm00001eb290370	4311.18	-0.513683	0.189652	-2.70856	0.00675756	0.029379	CK
Zm00001eb009640	745.877	-0.513661	0.110188	-4.66169	3.1363e-06	5.94876e-05	CK
[truncated: 3,761 more rows]

## Sheet: Table S7
Table S7 Heterotic bacterial ASVs between each hybrid and their parents under each soil condition. CK: control soil; LN: low nitrogen soil; LP: low phosphorus soil. BPH: better-parent heterosis; MPH: mid-parent heterosis.
Maternal	Paternal	Hybrid	MatMean	PatMean	HybMean	MidParentValue	BetterParentValue	Trait	MPH.pct	BPH.pct	BPH.padj	MPH.padj	HetType	Kingdom	Phylum	Class	Order	Family	Genus	Species	Confidence	Treatment
Mo17	Oh43	Mo17xOh43	12.8635	13.1797	12.6768	13.0216	12.8635	bASV3		-0.0145201	0.032455		BPH	Bacteria	Actinobacteriota	Actinobacteria	Micrococcales	Micrococcaceae	Unidentified	Unidentified	0.9999996	CK
Mo17	B73	Mo17xB73	12.8635	13.1193	12.5934	12.9914	12.8635	bASV3		-0.0210027	0.0281714		BPH	Bacteria	Actinobacteriota	Actinobacteria	Micrococcales	Micrococcaceae	Unidentified	Unidentified	0.9999996	CK
B73	Oh43	B73xOh43	13.1193	13.1797	12.6508	13.1495	13.1193	bASV3		-0.0357056	0.0214227		BPH	Bacteria	Actinobacteriota	Actinobacteria	Micrococcales	Micrococcaceae	Unidentified	Unidentified	0.9999996	CK
W64A	Oh43	W64AxOh43	12.7608	13.1797	12.7613	12.9703	13.1797	bASV3	-0.0161111			0.027873	MPH	Bacteria	Actinobacteriota	Actinobacteria	Micrococcales	Micrococcaceae	Unidentified	Unidentified	0.9999996	CK
Mo17	H84	Mo17xH84	11.9076	11.9301	11.7024	11.9189	11.9076	bASV6		-0.0172384	0.0352791		BPH	Bacteria	Proteobacteria	Alphaproteobacteria	Rhizobiales	Xanthobacteraceae	Bradyrhizobium	Unidentified	0.8019381	CK
B73	H84	B73xH84	11.9153	11.9301	11.617	11.9227	11.9153	bASV6		-0.0250372	0.0342317		BPH	Bacteria	Proteobacteria	Alphaproteobacteria	Rhizobiales	Xanthobacteraceae	Bradyrhizobium	Unidentified	0.8019381	CK
W64A	H84	W64AxH84	11.9816	11.9301	11.6906	11.9558	11.9301	bASV6		-0.0200766	0.0379249		BPH	Bacteria	Proteobacteria	Alphaproteobacteria	Rhizobiales	Xanthobacteraceae	Bradyrhizobium	Unidentified	0.8019381	CK
W64A	H99	W64AxH99	11.9816	11.8771	11.7789	11.9294	11.8771	bASV6		-0.00826732	0.0369342		BPH	Bacteria	Proteobacteria	Alphaproteobacteria	Rhizobiales	Xanthobacteraceae	Bradyrhizobium	Unidentified	0.8019381	CK
Mo17	Oh43	Mo17xOh43	11.903	11.7721	11.6032	11.8375	11.7721	bASV7		-0.0143453	0.0388304		BPH	Bacteria	Proteobacteria	Alphaproteobacteria	Rhizobiales	Methyloligellaceae	uncultured	Unidentified	0.9474687	CK
Mo17	W64A	Mo17xW64A	11.903	11.9167	11.4731	11.9098	11.903	bASV7		-0.0361109	0.0304923		BPH	Bacteria	Proteobacteria	Alphaproteobacteria	Rhizobiales	Methyloligellaceae	uncultured	Unidentified	0.9474687	CK
Mo17	B73	Mo17xB73	11.903	11.9109	11.2741	11.9069	11.903	bASV7		-0.0528363	0.0227206		BPH	Bacteria	Proteobacteria	Alphaproteobacteria	Rhizobiales	Methyloligellaceae	uncultured	Unidentified	0.9474687	CK
B73	Oh43	B73xOh43	11.9109	11.7721	11.5234	11.8415	11.7721	bASV7		-0.0211275	0.0309753		BPH	Bacteria	Proteobacteria	Alphaproteobacteria	Rhizobiales	Methyloligellaceae	uncultured	Unidentified	0.9474687	CK
A554	Oh43	A554xOh43	11.8105	11.7721	11.5355	11.7913	11.7721	bASV7		-0.0200956	0.0432413		BPH	Bacteria	Proteobacteria	Alphaproteobacteria	Rhizobiales	Methyloligellaceae	uncultured	Unidentified	0.9474687	CK
W64A	Oh43	W64AxOh43	11.9167	11.7721	11.5644	11.8444	11.7721	bASV7		-0.0176386	0.0355331		BPH	Bacteria	Proteobacteria	Alphaproteobacteria	Rhizobiales	Methyloligellaceae	uncultured	Unidentified	0.9474687	CK
Mo17	B73	Mo17xB73	11.0913	11.1873	11.7218	11.1393	11.1873	bASV9		0.0477828	0.00256294		BPH	Bacteria	Acidobacteriota	Blastocatellia	Pyrinomonadales	Pyrinomonadaceae	RB41	Unidentified	0.9982257	CK
Mo17	H84	Mo17xH84	11.0913	11.4466	11.5528	11.269	11.4466	bASV9		0.00927684	0.0416902		BPH	Bacteria	Acidobacteriota	Blastocatellia	Pyrinomonadales	Pyrinomonadaceae	RB41	Unidentified	0.9982257	CK
Mo17	H84	Mo17xH84	11.0436	11.2142	11.0785	11.1289	11.2142	bASV11	-0.00452658			0.0499478	MPH	Bacteria	Firmicutes	Bacilli	Bacillales	Bacillaceae	Bacillus	Unidentified	0.9103932	CK
B73	Oh43	B73xOh43	11.0718	11.1375	10.8805	11.1046	11.0718	bASV11		-0.0172731	0.0309753		BPH	Bacteria	Firmicutes	Bacilli	Bacillales	Bacillaceae	Bacillus	Unidentified	0.9103932	CK
Mo17	B73	Mo17xB73	10.8315	10.8086	10.5868	10.82	10.8086	bASV13		-0.0205233	0.0224766		BPH	Bacteria	Proteobacteria	Gammaproteobacteria	Steroidobacterales	Steroidobacteraceae	Steroidobacter	Unidentified	0.9224952	CK
B73	H84	B73xH84	10.8086	10.7309	10.6534	10.7697	10.7309	bASV13		-0.00721962	0.044591		BPH	Bacteria	Proteobacteria	Gammaproteobacteria	Steroidobacterales	Steroidobacteraceae	Steroidobacter	Unidentified	0.9224952	CK
B73	Oh43	B73xOh43	10.8086	10.9046	10.6043	10.8566	10.8086	bASV13		-0.0189027	0.0309753		BPH	Bacteria	Proteobacteria	Gammaproteobacteria	Steroidobacterales	Steroidobacteraceae	Steroidobacter	Unidentified	0.9224952	CK
W64A	H84	W64AxH84	10.8156	10.7309	10.6531	10.7732	10.7309	bASV13		-0.00724836	0.0210574		BPH	Bacteria	Proteobacteria	Gammaproteobacteria	Steroidobacterales	Steroidobacteraceae	Steroidobacter	Unidentified	0.9224952	CK
W64A	Oh43	W64AxOh43	10.8156	10.9046	10.7485	10.8601	10.8156	bASV13		-0.00620846	0.0437183		BPH	Bacteria	Proteobacteria	Gammaproteobacteria	Steroidobacterales	Steroidobacteraceae	Steroidobacter	Unidentified	0.9224952	CK
Mo17	B73	Mo17xB73	10.7851	10.729	10.5523	10.757	10.729	bASV14		-0.0164687	0.0457411		BPH	Bacteria	Nitrospirota	Nitrospiria	Nitrospirales	Nitrospiraceae	Nitrospira	Unidentified	1.0000000	CK
B73	Oh43	B73xOh43	10.729	10.6852	10.4221	10.7071	10.6852	bASV14		-0.0246218	0.023801		BPH	Bacteria	Nitrospirota	Nitrospiria	Nitrospirales	Nitrospiraceae	Nitrospira	Unidentified	1.0000000	CK
Mo17	H84	Mo17xH84	10.7005	10.5858	10.4301	10.6431	10.5858	bASV15		-0.014713	0.014459		BPH	Bacteria	Proteobacteria	Alphaproteobacteria	Rhizobiales	Xanthobacteraceae	uncultured	Unidentified	0.7502583	CK
W64A	H84	W64AxH84	10.6838	10.5858	10.4135	10.6348	10.5858	bASV15		-0.0162754	0.0379249		BPH	Bacteria	Proteobacteria	Alphaproteobacteria	Rhizobiales	Xanthobacteraceae	uncultured	Unidentified	0.7502583	CK
B73	H84	B73xH84	10.6817	10.7636	10.4724	10.7226	10.6817	bASV16		-0.0195894	0.0340326		BPH	Bacteria	Actinobacteriota	MB-A2-108	MB-A2-108	MB-A2-108	MB-A2-108	metagenome	0.9599172	CK
B73	Oh43	B73xOh43	10.6817	10.5922	10.876	10.637	10.6817	bASV16		0.0181905	0.0449745		BPH	Bacteria	Actinobacteriota	MB-A2-108	MB-A2-108	MB-A2-108	MB-A2-108	metagenome	0.9599172	CK
A554	H99	A554xH99	10.6753	10.7	10.411	10.6876	10.6753	bASV16		-0.0247527	0.0376966		BPH	Bacteria	Actinobacteriota	MB-A2-108	MB-A2-108	MB-A2-108	MB-A2-108	metagenome	0.9599172	CK
W64A	Oh43	W64AxOh43	10.7474	10.5922	10.428	10.6698	10.5922	bASV16		-0.0155029	0.0495118		BPH	Bacteria	Actinobacteriota	MB-A2-108	MB-A2-108	MB-A2-108	MB-A2-108	metagenome	0.9599172	CK
Mo17	W64A	Mo17xW64A	10.3791	10.3861	10.0558	10.3826	10.3791	bASV17		-0.031144	0.0426409		BPH	Bacteria	Proteobacteria	Alphaproteobacteria	Sphingomonadales	Sphingomonadaceae	Sphingomonas	Unidentified	0.9981729	CK
Mo17	B73	Mo17xB73	10.3791	10.3375	9.80717	10.3583	10.3375	bASV17		-0.0513033	0.0304025		BPH	Bacteria	Proteobacteria	Alphaproteobacteria	Sphingomonadales	Sphingomonadaceae	Sphingomonas	Unidentified	0.9981729	CK
Mo17	H84	Mo17xH84	10.3791	10.3327	10.1036	10.3559	10.3327	bASV17		-0.0221658	0.0373683		BPH	Bacteria	Proteobacteria	Alphaproteobacteria	Sphingomonadales	Sphingomonadaceae	Sphingomonas	Unidentified	0.9981729	CK
B73	H84	B73xH84	10.3375	10.3327	10.1266	10.3351	10.3327	bASV17		-0.0199402	0.0402234		BPH	Bacteria	Proteobacteria	Alphaproteobacteria	Sphingomonadales	Sphingomonadaceae	Sphingomonas	Unidentified	0.9981729	CK
A554	H84	A554xH84	10.3561	10.3327	10.1615	10.3444	10.3327	bASV17		-0.0165704	0.0375516		BPH	Bacteria	Proteobacteria	Alphaproteobacteria	Sphingomonadales	Sphingomonadaceae	Sphingomonas	Unidentified	0.9981729	CK
Mo17	A554	Mo17xA554	10.3791	10.3561	10.0992	10.3676	10.3561	bASV17		-0.0248033	0.0423011		BPH	Bacteria	Proteobacteria	Alphaproteobacteria	Sphingomonadales	Sphingomonadaceae	Sphingomonas	Unidentified	0.9981729	CK
Mo17	H84	Mo17xH84	10.4664	10.4941	10.3411	10.4803	10.4664	bASV18		-0.0119677	0.0352791		BPH	Bacteria	Actinobacteriota	Thermoleophilia	Gaiellales	Gaiellaceae	Gaiella	uncultured_actinobacterium	0.8941554	CK
B73	Oh43	B73xOh43	10.45	10.2733	10.5827	10.3616	10.45	bASV18		0.012704	0.0323525		BPH	Bacteria	Actinobacteriota	Thermoleophilia	Gaiellales	Gaiellaceae	Gaiella	uncultured_actinobacterium	0.8941554	CK
A554	H99	A554xH99	10.4398	10.3909	10.2861	10.4153	10.3909	bASV18		-0.0100845	0.032329		BPH	Bacteria	Actinobacteriota	Thermoleophilia	Gaiellales	Gaiellaceae	Gaiella	uncultured_actinobacterium	0.8941554	CK
Mo17	A554	Mo17xA554	10.4664	10.4398	10.308	10.4531	10.4398	bASV18		-0.0126214	0.0450278		BPH	Bacteria	Actinobacteriota	Thermoleophilia	Gaiellales	Gaiellaceae	Gaiella	uncultured_actinobacterium	0.8941554	CK
Mo17	B73	Mo17xB73	10.4321	10.3692	10.1443	10.4007	10.3692	bASV19		-0.0216839	0.0478303		BPH	Bacteria	Proteobacteria	Gammaproteobacteria	Steroidobacterales	Steroidobacteraceae	uncultured	Unidentified	0.9999960	CK
B73	Oh43	B73xOh43	10.3692	10.3443	10.1668	10.3567	10.3443	bASV19		-0.0171588	0.0214227		BPH	Bacteria	Proteobacteria	Gammaproteobacteria	Steroidobacterales	Steroidobacteraceae	uncultured	Unidentified	0.9999960	CK
A554	H84	A554xH84	10.3666	10.2653	10.1312	10.3159	10.2653	bASV19		-0.0130578	0.0481693		BPH	Bacteria	Proteobacteria	Gammaproteobacteria	Steroidobacterales	Steroidobacteraceae	uncultured	Unidentified	0.9999960	CK
Mo17	H84	Mo17xH84	10.4283	10.4226	10.3254	10.4255	10.4226	bASV20		-0.00932884	0.0240181		BPH	Bacteria	Nitrospirota	Nitrospiria	Nitrospirales	Nitrospiraceae	Nitrospira	Unidentified	1.0000000	CK
A554	H84	A554xH84	10.3964	10.4226	10.3035	10.4095	10.3964	bASV20		-0.00893744	0.0490081		BPH	Bacteria	Nitrospirota	Nitrospiria	Nitrospirales	Nitrospiraceae	Nitrospira	Unidentified	1.0000000	CK
B73	H84	B73xH84	10.2907	9.96239	11.0854	10.1265	10.2907	bASV21		0.0772271	0.026556		BPH	Bacteria	Bacteroidota	Bacteroidia	Chitinophagales	Chitinophagaceae	Flaviaesturariibacter	uncultured_bacterium	0.7073935	CK
W64A	Oh43	W64AxOh43	10.2791	10.4363	10.8246	10.3577	10.4363	bASV21		0.0372082	0.036569		BPH	Bacteria	Bacteroidota	Bacteroidia	Chitinophagales	Chitinophagaceae	Flaviaesturariibacter	uncultured_bacterium	0.7073935	CK
Mo17	B73	Mo17xB73	10.1604	10.1906	10.0617	10.1755	10.1604	bASV22		-0.00971173	0.0418605		BPH	Bacteria	Actinobacteriota	Thermoleophilia	Gaiellales	Gaiellaceae	Gaiella	Unidentified	0.9997083	CK
Mo17	H84	Mo17xH84	10.1604	10.2405	10.3086	10.2005	10.2405	bASV22		0.00664723	0.0378969		BPH	Bacteria	Actinobacteriota	Thermoleophilia	Gaiellales	Gaiellaceae	Gaiella	Unidentified	0.9997083	CK
Mo17	Oh43	Mo17xOh43	10.0598	10.2916	10.7294	10.1757	10.2916	bASV23		0.0425395	0.0487983		BPH	Bacteria	Verrucomicrobiota	Verrucomicrobiae	Chthoniobacterales	Xiphinematobacteraceae	Candidatus_Xiphinematobacter	uncultured_bacterium	0.9740724	CK
Mo17	W64A	Mo17xW64A	10.0598	10.2295	10.6504	10.1446	10.2295	bASV23		0.0411498	0.0434159		BPH	Bacteria	Verrucomicrobiota	Verrucomicrobiae	Chthoniobacterales	Xiphinematobacteraceae	Candidatus_Xiphinematobacter	uncultured_bacterium	0.9740724	CK
Mo17	B73	Mo17xB73	10.0598	9.94813	11.1113	10.004	10.0598	bASV23		0.104531	0.0179861		BPH	Bacteria	Verrucomicrobiota	Verrucomicrobiae	Chthoniobacterales	Xiphinematobacteraceae	Candidatus_Xiphinematobacter	uncultured_bacterium	0.9740724	CK
Mo17	H84	Mo17xH84	10.0598	10.1069	10.4204	10.0833	10.1069	bASV23		0.0310151	0.014459		BPH	Bacteria	Verrucomicrobiota	Verrucomicrobiae	Chthoniobacterales	Xiphinematobacteraceae	Candidatus_Xiphinematobacter	uncultured_bacterium	0.9740724	CK
B73	H84	B73xH84	9.94813	10.1069	10.6726	10.0275	10.1069	bASV23		0.0559734	0.0124675		BPH	Bacteria	Verrucomicrobiota	Verrucomicrobiae	Chthoniobacterales	Xiphinematobacteraceae	Candidatus_Xiphinematobacter	uncultured_bacterium	0.9740724	CK
B73	H99	B73xH99	9.94813	10.1761	10.5666	10.0621	10.1761	bASV23		0.0383727	0.0171422		BPH	Bacteria	Verrucomicrobiota	Verrucomicrobiae	Chthoniobacterales	Xiphinematobacteraceae	Candidatus_Xiphinematobacter	uncultured_bacterium	0.9740724	CK
A554	H99	A554xH99	10.3686	10.1761	10.7393	10.2723	10.3686	bASV23		0.035752	0.0365359		BPH	Bacteria	Verrucomicrobiota	Verrucomicrobiae	Chthoniobacterales	Xiphinematobacteraceae	Candidatus_Xiphinematobacter	uncultured_bacterium	0.9740724	CK
W64A	Oh43	W64AxOh43	10.2295	10.2916	10.8229	10.2606	10.2916	bASV23		0.0516252	0.0191982		BPH	Bacteria	Verrucomicrobiota	Verrucomicrobiae	Chthoniobacterales	Xiphinematobacteraceae	Candidatus_Xiphinematobacter	uncultured_bacterium	0.9740724	CK
Mo17	H99	Mo17xH99	10.0598	10.1761	10.4574	10.1179	10.1761	bASV23		0.0276494	0.0218081		BPH	Bacteria	Verrucomicrobiota	Verrucomicrobiae	Chthoniobacterales	Xiphinematobacteraceae	Candidatus_Xiphinematobacter	uncultured_bacterium	0.9740724	CK
Mo17	H84	Mo17xH84	10.0867	10.108	9.92907	10.0973	10.0867	bASV24		-0.0156273	0.0378969		BPH	Bacteria	Actinobacteriota	Thermoleophilia	Gaiellales	uncultured	uncultured	Unidentified	0.9986296	CK
B73	H84	B73xH84	10.0949	10.108	9.81422	10.1014	10.0949	bASV24		-0.0278009	0.015592		BPH	Bacteria	Actinobacteriota	Thermoleophilia	Gaiellales	uncultured	uncultured	Unidentified	0.9986296	CK
Mo17	A554	Mo17xA554	10.0867	10.1306	9.97049	10.1086	10.0867	bASV24		-0.0115211	0.0473048		BPH	Bacteria	Actinobacteriota	Thermoleophilia	Gaiellales	uncultured	uncultured	Unidentified	0.9986296	CK
B73	Oh43	B73xOh43	10.0226	9.94532	10.2599	9.98395	10.0226	bASV25		0.0236813	0.0152264		BPH	Bacteria	Actinobacteriota	Thermoleophilia	Solirubrobacterales	67-14	67-14	uncultured_Rubrobacteria	0.9056312	CK
A554	H99	A554xH99	10.0892	10.0454	9.819	10.0673	10.0454	bASV25		-0.0225375	0.0499851		BPH	Bacteria	Actinobacteriota	Thermoleophilia	Solirubrobacterales	67-14	67-14	uncultured_Rubrobacteria	0.9056312	CK
W64A	Oh43	W64AxOh43	9.99501	10.0081	10.2331	10.0016	10.0081	bASV26		0.0224801	0.0327066		BPH	Bacteria	Proteobacteria	Gammaproteobacteria	Burkholderiales	Comamonadaceae	Unidentified	Unidentified	0.9999995	CK
Mo17	W64A	Mo17xW64A	9.9872	9.96484	9.60743	9.97602	9.96484	bASV27		-0.0358673	0.0483114		BPH	Bacteria	Actinobacteriota	Thermoleophilia	Gaiellales	uncultured	uncultured	Unidentified	0.9999334	CK
Mo17	B73	Mo17xB73	9.9872	9.92683	9.48847	9.95702	9.92683	bASV27		-0.0441596	0.0179861		BPH	Bacteria	Actinobacteriota	Thermoleophilia	Gaiellales	uncultured	uncultured	Unidentified	0.9999334	CK
Mo17	H84	Mo17xH84	9.9872	9.93654	9.76014	9.96187	9.93654	bASV27		-0.0177532	0.0204767		BPH	Bacteria	Actinobacteriota	Thermoleophilia	Gaiellales	uncultured	uncultured	Unidentified	0.9999334	CK
B73	H84	B73xH84	9.92683	9.93654	9.68825	9.93169	9.92683	bASV27		-0.0240341	0.036488		BPH	Bacteria	Actinobacteriota	Thermoleophilia	Gaiellales	uncultured	uncultured	Unidentified	0.9999334	CK
Mo17	H84	Mo17xH84	10.3566	10.3121	10.2136	10.3343	10.3121	bASV28		-0.00955138	0.0216301		BPH	Bacteria	Myxococcota	bacteriap25	bacteriap25	bacteriap25	bacteriap25	Unidentified	0.8987431	CK
B73	H84	B73xH84	10.2712	10.3121	10.1332	10.2917	10.2712	bASV28		-0.0134429	0.0496583		BPH	Bacteria	Myxococcota	bacteriap25	bacteriap25	bacteriap25	bacteriap25	Unidentified	0.8987431	CK
B73	Oh43	B73xOh43	10.2712	10.2418	10.0743	10.2565	10.2418	bASV28		-0.0163627	0.0309753		BPH	Bacteria	Myxococcota	bacteriap25	bacteriap25	bacteriap25	bacteriap25	Unidentified	0.8987431	CK
Mo17	B73	Mo17xB73	10.0156	10.0349	9.80937	10.0252	10.0156	bASV29		-0.020587	0.0490583		BPH	Bacteria	Actinobacteriota	Actinobacteria	Frankiales	Geodermatophilaceae	Blastococcus	Unidentified	0.9985356	CK
B73	Oh43	B73xOh43	10.0349	9.85816	10.3108	9.94651	10.0349	bASV29		0.0274962	0.0188156		BPH	Bacteria	Actinobacteriota	Actinobacteria	Frankiales	Geodermatophilaceae	Blastococcus	Unidentified	0.9985356	CK
A554	H99	A554xH99	9.98015	10.0072	9.88349	9.99367	9.98015	bASV29		-0.00968523	0.0435489		BPH	Bacteria	Actinobacteriota	Actinobacteria	Frankiales	Geodermatophilaceae	Blastococcus	Unidentified	0.9985356	CK
W64A	H84	W64AxH84	9.97449	10.0562	10.2444	10.0153	10.0562	bASV29		0.0187153	0.0399346		BPH	Bacteria	Actinobacteriota	Actinobacteria	Frankiales	Geodermatophilaceae	Blastococcus	Unidentified	0.9985356	CK
Mo17	W64A	Mo17xW64A	10.2613	10.0998	9.83237	10.1805	10.0998	bASV30		-0.0264765	0.0336554		BPH	Bacteria	Proteobacteria	Gammaproteobacteria	Xanthomonadales	Xanthomonadaceae	Luteimonas	Unidentified	0.7968985	CK
Mo17	H99	Mo17xH99	10.2613	9.8446	9.86593	10.0529	10.2613	bASV30	-0.0186014			0.0448027	MPH	Bacteria	Proteobacteria	Gammaproteobacteria	Xanthomonadales	Xanthomonadaceae	Luteimonas	Unidentified	0.7968985	CK
Mo17	H84	Mo17xH84	9.8682	9.89491	10.1278	9.88155	9.89491	bASV31		0.0235315	0.014459		BPH	Bacteria	Firmicutes	Bacilli	Bacillales	Bacillaceae	Bacillus	Unidentified	0.8879350	CK
Mo17	B73	Mo17xB73	9.60206	9.6411	10.067	9.62158	9.6411	bASV32		0.0441706	0.0226212		BPH	Bacteria	Acidobacteriota	Blastocatellia	Pyrinomonadales	Pyrinomonadaceae	RB41	Unidentified	0.9844828	CK
A554	Oh43	A554xOh43	10.0944	9.81238	9.81602	9.95338	10.0944	bASV32	-0.013801			0.0490671	MPH	Bacteria	Acidobacteriota	Blastocatellia	Pyrinomonadales	Pyrinomonadaceae	RB41	Unidentified	0.9844828	CK
Mo17	Oh43	Mo17xOh43	9.42436	9.77518	10.0282	9.59977	9.77518	bASV33		0.025882	0.0451227		BPH	Bacteria	Acidobacteriota	Blastocatellia	Pyrinomonadales	Pyrinomonadaceae	RB41	Unidentified	0.9850726	CK
Mo17	W64A	Mo17xW64A	9.42436	9.8785	10.0097	9.65143	9.8785	bASV33		0.0132858	0.0470989		BPH	Bacteria	Acidobacteriota	Blastocatellia	Pyrinomonadales	Pyrinomonadaceae	RB41	Unidentified	0.9850726	CK
Mo17	B73	Mo17xB73	9.42436	9.54048	9.95935	9.48242	9.54048	bASV33		0.0439051	0.033644		BPH	Bacteria	Acidobacteriota	Blastocatellia	Pyrinomonadales	Pyrinomonadaceae	RB41	Unidentified	0.9850726	CK
Mo17	H84	Mo17xH84	9.42436	9.61034	9.88813	9.51735	9.61034	bASV33		0.0289048	0.0495009		BPH	Bacteria	Acidobacteriota	Blastocatellia	Pyrinomonadales	Pyrinomonadaceae	RB41	Unidentified	0.9850726	CK
B73	H84	B73xH84	9.54048	9.61034	9.92494	9.57541	9.61034	bASV33		0.0327359	0.033464		BPH	Bacteria	Acidobacteriota	Blastocatellia	Pyrinomonadales	Pyrinomonadaceae	RB41	Unidentified	0.9850726	CK
W64A	Oh43	W64AxOh43	9.8785	9.77518	10.1242	9.82684	9.8785	bASV33		0.0248729	0.036569		BPH	Bacteria	Acidobacteriota	Blastocatellia	Pyrinomonadales	Pyrinomonadaceae	RB41	Unidentified	0.9850726	CK
Mo17	H99	Mo17xH99	9.42436	9.81042	9.89854	9.61739	9.81042	bASV33		0.00898191	0.0251229		BPH	Bacteria	Acidobacteriota	Blastocatellia	Pyrinomonadales	Pyrinomonadaceae	RB41	Unidentified	0.9850726	CK
A554	H99	A554xH99	9.8839	9.84054	10.0194	9.86222	9.8839	bASV34		0.0137057	0.0405397		BPH	Bacteria	Proteobacteria	Alphaproteobacteria	Azospirillales	Azospirillaceae	Skermanella	Unidentified	0.9962230	CK
Mo17	Oh43	Mo17xOh43	9.76856	9.83781	9.59098	9.80318	9.76856	bASV35		-0.0181789	0.0487983		BPH	Bacteria	Actinobacteriota	Thermoleophilia	Gaiellales	Gaiellaceae	Gaiella	Unidentified	0.9985473	CK
Mo17	W64A	Mo17xW64A	9.76856	9.82913	9.67529	9.79885	9.76856	bASV35		-0.00954885	0.0225217		BPH	Bacteria	Actinobacteriota	Thermoleophilia	Gaiellales	Gaiellaceae	Gaiella	Unidentified	0.9985473	CK
W64A	Oh43	W64AxOh43	9.82913	9.83781	9.64639	9.83347	9.82913	bASV35		-0.0185919	0.0248874		BPH	Bacteria	Actinobacteriota	Thermoleophilia	Gaiellales	Gaiellaceae	Gaiella	Unidentified	0.9985473	CK
Mo17	B73	Mo17xB73	9.44166	9.61895	10.0639	9.53031	9.61895	bASV37		0.0462535	0.0179861		BPH	Bacteria	Acidobacteriota	Vicinamibacteria	Vicinamibacterales	uncultured	uncultured	uncultured_bacterium	0.7783202	CK
A554	H84	A554xH84	9.81993	9.93557	9.65724	9.87775	9.81993	bASV37		-0.016568	0.0490081		BPH	Bacteria	Acidobacteriota	Vicinamibacteria	Vicinamibacterales	uncultured	uncultured	uncultured_bacterium	0.7783202	CK
Mo17	H99	Mo17xH99	9.44166	9.70363	9.93205	9.57265	9.70363	bASV37		0.0235396	0.044213		BPH	Bacteria	Acidobacteriota	Vicinamibacteria	Vicinamibacterales	uncultured	uncultured	uncultured_bacterium	0.7783202	CK
Mo17	Oh43	Mo17xOh43	9.81326	9.74697	9.46808	9.78011	9.74697	bASV39		-0.0286128	0.0487983		BPH	Bacteria	Proteobacteria	Alphaproteobacteria	Sphingomonadales	Sphingomonadaceae	Sphingomonas	Unidentified	0.9968156	CK
Mo17	W64A	Mo17xW64A	9.81326	9.83097	9.55938	9.82212	9.81326	bASV39		-0.0258712	0.0388047		BPH	Bacteria	Proteobacteria	Alphaproteobacteria	Sphingomonadales	Sphingomonadaceae	Sphingomonas	Unidentified	0.9968156	CK
Mo17	B73	Mo17xB73	9.81326	9.75718	9.44448	9.78522	9.75718	bASV39		-0.0320491	0.0475932		BPH	Bacteria	Proteobacteria	Alphaproteobacteria	Sphingomonadales	Sphingomonadaceae	Sphingomonas	Unidentified	0.9968156	CK
Mo17	A554	Mo17xA554	9.81326	9.84892	9.59146	9.83109	9.81326	bASV39		-0.0226014	0.0450278		BPH	Bacteria	Proteobacteria	Alphaproteobacteria	Sphingomonadales	Sphingomonadaceae	Sphingomonas	Unidentified	0.9968156	CK
A554	H99	A554xH99	9.80182	9.7353	9.90014	9.76856	9.80182	bASV40		0.0100307	0.0435489		BPH	Bacteria	Proteobacteria	Alphaproteobacteria	Rhizobiales	Beijerinckiaceae	Microvirga	Microvirga_aerilata	0.9332330	CK
B73	H84	B73xH84	9.55409	9.52276	9.32848	9.53842	9.52276	bASV42		-0.0204019	0.0474801		BPH	Bacteria	Acidobacteriota	Subgroup_11	Subgroup_11	Subgroup_11	Subgroup_11	uncultured_bacterium	0.9999998	CK
A554	H84	A554xH84	9.614	9.52276	9.34709	9.56838	9.52276	bASV42		-0.0184467	0.0358413		BPH	Bacteria	Acidobacteriota	Subgroup_11	Subgroup_11	Subgroup_11	Subgroup_11	uncultured_bacterium	0.9999998	CK
W64A	H84	W64AxH84	9.53457	9.52276	9.3198	9.52866	9.52276	bASV42		-0.0213129	0.0466541		BPH	Bacteria	Acidobacteriota	Subgroup_11	Subgroup_11	Subgroup_11	Subgroup_11	uncultured_bacterium	0.9999998	CK
Mo17	A554	Mo17xA554	9.57561	9.614	9.49799	9.59481	9.57561	bASV42		-0.00810609	0.0489473		BPH	Bacteria	Acidobacteriota	Subgroup_11	Subgroup_11	Subgroup_11	Subgroup_11	uncultured_bacterium	0.9999998	CK
Mo17	W64A	Mo17xW64A	9.76072	9.69975	9.46407	9.73023	9.69975	bASV43		-0.0242972	0.0477954		BPH	Bacteria	Actinobacteriota	Thermoleophilia	Gaiellales	Gaiellaceae	Gaiella	Unidentified	0.9863302	CK
Mo17	B73	Mo17xB73	9.76072	9.65068	9.27936	9.7057	9.65068	bASV43		-0.0384753	0.0289622		BPH	Bacteria	Actinobacteriota	Thermoleophilia	Gaiellales	Gaiellaceae	Gaiella	Unidentified	0.9863302	CK
Mo17	H84	Mo17xH84	9.76072	9.69992	9.52071	9.73032	9.69992	bASV43		-0.0184751	0.0432637		BPH	Bacteria	Actinobacteriota	Thermoleophilia	Gaiellales	Gaiellaceae	Gaiella	Unidentified	0.9863302	CK
B73	Oh43	B73xOh43	9.65068	9.50893	9.80435	9.57981	9.65068	bASV43		0.0159238	0.0454285		BPH	Bacteria	Actinobacteriota	Thermoleophilia	Gaiellales	Gaiellaceae	Gaiella	Unidentified	0.9863302	CK
A554	H84	A554xH84	9.6723	9.69992	9.48432	9.68611	9.6723	bASV43		-0.0194354	0.0375516		BPH	Bacteria	Actinobacteriota	Thermoleophilia	Gaiellales	Gaiellaceae	Gaiella	Unidentified	0.9863302	CK
A554	H99	A554xH99	9.6723	9.54727	9.4334	9.60978	9.54727	bASV43		-0.0119267	0.0435489		BPH	Bacteria	Actinobacteriota	Thermoleophilia	Gaiellales	Gaiellaceae	Gaiella	Unidentified	0.9863302	CK
Mo17	W64A	Mo17xW64A	9.70676	9.78361	9.48581	9.74518	9.70676	bASV44		-0.022762	0.0205751		BPH	Bacteria	Actinobacteriota	Actinobacteria	Propionibacteriales	Nocardioidaceae	Nocardioides	Unidentified	0.9685058	CK
B73	Oh43	B73xOh43	9.64361	9.71676	9.83662	9.68018	9.71676	bASV44		0.0123353	0.0391455		BPH	Bacteria	Actinobacteriota	Actinobacteria	Propionibacteriales	Nocardioidaceae	Nocardioides	Unidentified	0.9685058	CK
W64A	Oh43	W64AxOh43	9.78361	9.71676	9.53528	9.75018	9.71676	bASV44		-0.0186768	0.0248874		BPH	Bacteria	Actinobacteriota	Actinobacteria	Propionibacteriales	Nocardioidaceae	Nocardioides	Unidentified	0.9685058	CK
B73	Oh43	B73xOh43	9.80351	9.87855	9.62823	9.84103	9.80351	bASV46		-0.0178791	0.0214227		BPH	Bacteria	Myxococcota	Myxococcia	Myxococcales	Myxococcaceae	Unidentified	Unidentified	0.9987843	CK
A554	H99	A554xH99	9.77872	9.7571	9.63997	9.76791	9.7571	bASV46		-0.0120047	0.0478027		BPH	Bacteria	Myxococcota	Myxococcia	Myxococcales	Myxococcaceae	Unidentified	Unidentified	0.9987843	CK
W64A	Oh43	W64AxOh43	9.79612	9.87855	9.56704	9.83733	9.79612	bASV46		-0.023384	0.0420588		BPH	Bacteria	Myxococcota	Myxococcia	Myxococcales	Myxococcaceae	Unidentified	Unidentified	0.9987843	CK
Mo17	Oh43	Mo17xOh43	9.50778	9.62093	9.88278	9.56435	9.62093	bASV47		0.0272168	0.0487983		BPH	Bacteria	Acidobacteriota	Vicinamibacteria	Vicinamibacterales	Vicinamibacteraceae	Vicinamibacteraceae	Unidentified	0.9991287	CK
W64A	H84	W64AxH84	9.74764	9.8936	9.63476	9.82062	9.74764	bASV47		-0.0115802	0.0488781		BPH	Bacteria	Acidobacteriota	Vicinamibacteria	Vicinamibacterales	Vicinamibacteraceae	Vicinamibacteraceae	Unidentified	0.9991287	CK
W64A	Oh43	W64AxOh43	9.74764	9.62093	9.88101	9.68428	9.74764	bASV47		0.0136825	0.0385926		BPH	Bacteria	Acidobacteriota	Vicinamibacteria	Vicinamibacterales	Vicinamibacteraceae	Vicinamibacteraceae	Unidentified	0.9991287	CK
B73	Oh43	B73xOh43	9.85397	9.84561	9.54264	9.84979	9.84561	bASV48		-0.0307728	0.0248087		BPH	Bacteria	Acidobacteriota	Acidobacteriae	Bryobacterales	Bryobacteraceae	Bryobacter	Unidentified	0.9992590	CK
Mo17	W64A	Mo17xW64A	8.15534	8.29045	7.5376	8.22289	8.15534	bASV50		-0.0757472	0.0336554		BPH	Bacteria	Chloroflexi	KD4-96	KD4-96	KD4-96	KD4-96	Unidentified	1.0000000	CK
Mo17	H84	Mo17xH84	8.15534	9.6869	7.53868	8.92112	8.15534	bASV50		-0.0756149	0.0216177		BPH	Bacteria	Chloroflexi	KD4-96	KD4-96	KD4-96	KD4-96	Unidentified	1.0000000	CK
B73	H84	B73xH84	7.9014	9.6869	7.5369	8.79415	7.9014	bASV50		-0.0461312	0.0124675		BPH	Bacteria	Chloroflexi	KD4-96	KD4-96	KD4-96	KD4-96	Unidentified	1.0000000	CK
B73	H99	B73xH99	7.9014	8.45951	7.5397	8.18046	7.9014	bASV50		-0.0457768	0.0356397		BPH	Bacteria	Chloroflexi	KD4-96	KD4-96	KD4-96	KD4-96	Unidentified	1.0000000	CK
B73	Oh43	B73xOh43	7.9014	7.53844	9.63348	7.71992	7.9014	bASV50		0.219211	0.00534749		BPH	Bacteria	Chloroflexi	KD4-96	KD4-96	KD4-96	KD4-96	Unidentified	1.0000000	CK
A554	H84	A554xH84	7.91996	9.6869	9.66261	8.80343	9.6869	bASV50	0.0975963			0.0369363	MPH	Bacteria	Chloroflexi	KD4-96	KD4-96	KD4-96	KD4-96	Unidentified	1.0000000	CK
A554	Oh43	A554xOh43	7.91996	7.53844	8.8407	7.7292	7.91996	bASV50		0.116255	0.018095		BPH	Bacteria	Chloroflexi	KD4-96	KD4-96	KD4-96	KD4-96	Unidentified	1.0000000	CK
W64A	H84	W64AxH84	8.29045	9.6869	8.29569	8.98867	9.6869	bASV50	-0.0770952			0.00352375	MPH	Bacteria	Chloroflexi	KD4-96	KD4-96	KD4-96	KD4-96	Unidentified	1.0000000	CK
W64A	H99	W64AxH99	8.29045	8.45951	8.91149	8.37498	8.45951	bASV50		0.0534285	0.0372979		BPH	Bacteria	Chloroflexi	KD4-96	KD4-96	KD4-96	KD4-96	Unidentified	1.0000000	CK
W64A	Oh43	W64AxOh43	8.29045	7.53844	8.96677	7.91444	8.29045	bASV50		0.0815786	0.0192079		BPH	Bacteria	Chloroflexi	KD4-96	KD4-96	KD4-96	KD4-96	Unidentified	1.0000000	CK
Mo17	H99	Mo17xH99	8.15534	8.45951	7.53702	8.30743	8.15534	bASV50		-0.0758176	0.0218081		BPH	Bacteria	Chloroflexi	KD4-96	KD4-96	KD4-96	KD4-96	Unidentified	1.0000000	CK
Mo17	W64A	Mo17xW64A	9.7391	9.80998	10.0246	9.77454	9.80998	bASV51		0.0218819	0.0336554		BPH	Bacteria	Firmicutes	Bacilli	Bacillales	Unidentified	Unidentified	Unidentified	0.9999713	CK
Mo17	H99	Mo17xH99	9.7391	9.75367	9.91939	9.74638	9.75367	bASV51		0.0169915	0.0302977		BPH	Bacteria	Firmicutes	Bacilli	Bacillales	Unidentified	Unidentified	Unidentified	0.9999713	CK
Mo17	H84	Mo17xH84	9.62179	9.96975	9.9394	9.79577	9.96975	bASV52	0.0146623			0.040737	MPH	Bacteria	Proteobacteria	Alphaproteobacteria	Azospirillales	uncultured	uncultured	uncultured_bacterium	0.9737621	CK
A554	H84	A554xH84	9.54625	9.96975	9.84294	9.758	9.96975	bASV52	0.00870481			0.0369363	MPH	Bacteria	Proteobacteria	Alphaproteobacteria	Azospirillales	uncultured	uncultured	uncultured_bacterium	0.9737621	CK
W64A	H84	W64AxH84	9.56516	9.96975	9.85853	9.76745	9.96975	bASV52	0.00932422			0.0330822	MPH	Bacteria	Proteobacteria	Alphaproteobacteria	Azospirillales	uncultured	uncultured	uncultured_bacterium	0.9737621	CK
Mo17	A554	Mo17xA554	9.62179	9.54625	9.82206	9.58402	9.62179	bASV52		0.0208146	0.0424467		BPH	Bacteria	Proteobacteria	Alphaproteobacteria	Azospirillales	uncultured	uncultured	uncultured_bacterium	0.9737621	CK
B73	H99	B73xH99	9.61663	9.55138	9.37716	9.58401	9.55138	bASV53		-0.0182404	0.0285545		BPH	Bacteria	Actinobacteriota	Actinobacteria	Propionibacteriales	Nocardioidaceae	Unidentified	Unidentified	0.9999944	CK
A554	H99	A554xH99	9.60742	9.55138	9.28919	9.5794	9.55138	bASV53		-0.0274507	0.0396317		BPH	Bacteria	Actinobacteriota	Actinobacteria	Propionibacteriales	Nocardioidaceae	Unidentified	Unidentified	0.9999944	CK
Mo17	H99	Mo17xH99	9.66452	9.55138	9.39651	9.60795	9.55138	bASV53		-0.0162144	0.0441116		BPH	Bacteria	Actinobacteriota	Actinobacteria	Propionibacteriales	Nocardioidaceae	Unidentified	Unidentified	0.9999944	CK
Mo17	W64A	Mo17xW64A	9.55083	9.77236	10.0744	9.6616	9.77236	bASV54		0.0309085	0.0252711		BPH	Bacteria	Firmicutes	Bacilli	Bacillales	Bacillaceae	Bacillus	Unidentified	0.9993159	CK
Mo17	H84	Mo17xH84	9.55083	9.89611	10.0966	9.72347	9.89611	bASV54		0.0202557	0.0495009		BPH	Bacteria	Firmicutes	Bacilli	Bacillales	Bacillaceae	Bacillus	Unidentified	0.9993159	CK
B73	H99	B73xH99	9.89846	9.80123	10.1921	9.84984	9.89846	bASV54		0.0296634	0.0178443		BPH	Bacteria	Firmicutes	Bacilli	Bacillales	Bacillaceae	Bacillus	Unidentified	0.9993159	CK
A554	H99	A554xH99	9.86438	9.80123	9.65959	9.8328	9.80123	bASV54		-0.0144516	0.0435489		BPH	Bacteria	Firmicutes	Bacilli	Bacillales	Bacillaceae	Bacillus	Unidentified	0.9993159	CK
A554	H99	A554xH99	9.59705	9.65375	9.83024	9.6254	9.65375	bASV55		0.0182818	0.0445247		BPH	Bacteria	Proteobacteria	Alphaproteobacteria	Rhizobiales	Xanthobacteraceae	Pseudolabrys	Unidentified	0.7919711	CK
Mo17	B73	Mo17xB73	9.74517	9.66263	9.42217	9.7039	9.66263	bASV56		-0.0248853	0.0452671		BPH	Bacteria	Firmicutes	Clostridia	Clostridiales	Clostridiaceae	Clostridium_sensu_stricto_13	Unidentified	0.9906933	CK
Mo17	H84	Mo17xH84	9.74517	9.36419	9.61822	9.55468	9.74517	bASV56	0.00664977			0.0479281	MPH	Bacteria	Firmicutes	Clostridia	Clostridiales	Clostridiaceae	Clostridium_sensu_stricto_13	Unidentified	0.9906933	CK
Mo17	A554	Mo17xA554	9.74517	9.69168	9.51107	9.71843	9.69168	bASV56		-0.018636	0.0450278		BPH	Bacteria	Firmicutes	Clostridia	Clostridiales	Clostridiaceae	Clostridium_sensu_stricto_13	Unidentified	0.9906933	CK
Mo17	W64A	Mo17xW64A	9.61368	9.59418	9.36243	9.60393	9.59418	bASV57		-0.0241548	0.0398162		BPH	Bacteria	Actinobacteriota	Actinobacteria	Micrococcales	Microbacteriaceae	Agromyces	Unidentified	0.9939391	CK
B73	H99	B73xH99	9.60572	9.4752	9.37484	9.54046	9.4752	bASV57		-0.0105916	0.0430381		BPH	Bacteria	Actinobacteriota	Actinobacteria	Micrococcales	Microbacteriaceae	Agromyces	Unidentified	0.9939391	CK
Mo17	W64A	Mo17xW64A	9.3536	9.63226	10.5226	9.49293	9.63226	bASV58		0.0924383	0.0354675		BPH	Bacteria	Chloroflexi	KD4-96	KD4-96	KD4-96	KD4-96	Unidentified	1.0000000	CK
Mo17	H84	Mo17xH84	9.3536	8.39336	10.4966	8.87348	9.3536	bASV58		0.1222	0.0216177		BPH	Bacteria	Chloroflexi	KD4-96	KD4-96	KD4-96	KD4-96	Unidentified	1.0000000	CK
B73	H84	B73xH84	9.8283	8.39336	10.6078	9.11083	9.8283	bASV58		0.0793162	0.0124675		BPH	Bacteria	Chloroflexi	KD4-96	KD4-96	KD4-96	KD4-96	Unidentified	1.0000000	CK
B73	H99	B73xH99	9.8283	9.44763	10.5801	9.63796	9.8283	bASV58		0.0764976	0.0226995		BPH	Bacteria	Chloroflexi	KD4-96	KD4-96	KD4-96	KD4-96	Unidentified	1.0000000	CK
B73	Oh43	B73xOh43	9.8283	10.3458	8.20001	10.087	9.8283	bASV58		-0.165674	0.00545264		BPH	Bacteria	Chloroflexi	KD4-96	KD4-96	KD4-96	KD4-96	Unidentified	1.0000000	CK
A554	Oh43	A554xOh43	10.0974	10.3458	8.896	10.2216	10.0974	bASV58		-0.118983	0.018095		BPH	Bacteria	Chloroflexi	KD4-96	KD4-96	KD4-96	KD4-96	Unidentified	1.0000000	CK
W64A	H99	W64AxH99	9.63226	9.44763	8.88049	9.53994	9.44763	bASV58		-0.0600294	0.0352008		BPH	Bacteria	Chloroflexi	KD4-96	KD4-96	KD4-96	KD4-96	Unidentified	1.0000000	CK
W64A	Oh43	W64AxOh43	9.63226	10.3458	8.86281	9.98901	9.63226	bASV58		-0.0798823	0.0111329		BPH	Bacteria	Chloroflexi	KD4-96	KD4-96	KD4-96	KD4-96	Unidentified	1.0000000	CK
Mo17	H99	Mo17xH99	9.3536	9.44763	10.4505	9.40062	9.44763	bASV58		0.106154	0.0218081		BPH	Bacteria	Chloroflexi	KD4-96	KD4-96	KD4-96	KD4-96	Unidentified	1.0000000	CK
A554	H84	A554xH84	9.74359	9.67024	9.48797	9.70692	9.67024	bASV59		-0.0188485	0.0490081		BPH	Bacteria	Acidobacteriota	Vicinamibacteria	Vicinamibacterales	Vicinamibacteraceae	Vicinamibacteraceae	Unidentified	0.9997716	CK
A554	Oh43	A554xOh43	9.74359	9.58309	9.43211	9.66334	9.58309	bASV59		-0.015755	0.0454073		BPH	Bacteria	Acidobacteriota	Vicinamibacteria	Vicinamibacterales	Vicinamibacteraceae	Vicinamibacteraceae	Unidentified	0.9997716	CK
Mo17	B73	Mo17xB73	9.30932	9.23026	9.7877	9.26979	9.30932	bASV62		0.0513868	0.0430838		BPH	Bacteria	Verrucomicrobiota	Verrucomicrobiae	Chthoniobacterales	Chthoniobacteraceae	Candidatus_Udaeobacter	Unidentified	0.9999998	CK
Mo17	H84	Mo17xH84	9.30932	9.33161	9.65931	9.32046	9.33161	bASV62		0.0351172	0.0373683		BPH	Bacteria	Verrucomicrobiota	Verrucomicrobiae	Chthoniobacterales	Chthoniobacteraceae	Candidatus_Udaeobacter	Unidentified	0.9999998	CK
B73	H84	B73xH84	9.23026	9.33161	9.58079	9.28093	9.33161	bASV62		0.026703	0.0474801		BPH	Bacteria	Verrucomicrobiota	Verrucomicrobiae	Chthoniobacterales	Chthoniobacteraceae	Candidatus_Udaeobacter	Unidentified	0.9999998	CK
B73	H99	B73xH99	9.23026	9.13868	9.70465	9.18447	9.23026	bASV62		0.0513949	0.0171422		BPH	Bacteria	Verrucomicrobiota	Verrucomicrobiae	Chthoniobacterales	Chthoniobacteraceae	Candidatus_Udaeobacter	Unidentified	0.9999998	CK
Mo17	H99	Mo17xH99	9.30932	9.13868	9.72258	9.224	9.30932	bASV62		0.0443915	0.0246864		BPH	Bacteria	Verrucomicrobiota	Verrucomicrobiae	Chthoniobacterales	Chthoniobacteraceae	Candidatus_Udaeobacter	Unidentified	0.9999998	CK
Mo17	Oh43	Mo17xOh43	9.17077	9.01572	8.70703	9.09324	9.01572	bASV63		-0.0342396	0.0487983		BPH	Bacteria	Actinobacteriota	MB-A2-108	MB-A2-108	MB-A2-108	MB-A2-108	metagenome	0.7783268	CK
Mo17	W64A	Mo17xW64A	9.17077	9.22063	8.97237	9.1957	9.17077	bASV63		-0.0216335	0.0388047		BPH	Bacteria	Actinobacteriota	MB-A2-108	MB-A2-108	MB-A2-108	MB-A2-108	metagenome	0.7783268	CK
B73	H84	B73xH84	9.2812	9.19854	8.89214	9.23987	9.19854	bASV63		-0.03331	0.0265135		BPH	Bacteria	Actinobacteriota	MB-A2-108	MB-A2-108	MB-A2-108	MB-A2-108	metagenome	0.7783268	CK
A554	H99	A554xH99	9.27539	9.09237	8.72982	9.18388	9.09237	bASV63		-0.0398743	0.0407569		BPH	Bacteria	Actinobacteriota	MB-A2-108	MB-A2-108	MB-A2-108	MB-A2-108	metagenome	0.7783268	CK
Mo17	A554	Mo17xA554	9.17077	9.27539	8.78512	9.22308	9.17077	bASV63		-0.0420522	0.0423011		BPH	Bacteria	Actinobacteriota	MB-A2-108	MB-A2-108	MB-A2-108	MB-A2-108	metagenome	0.7783268	CK
Mo17	Oh43	Mo17xOh43	9.27013	9.31333	9.13433	9.29173	9.27013	bASV64		-0.0146484	0.0487983		BPH	Bacteria	Actinobacteriota	Actinobacteria	Micrococcales	Intrasporangiaceae	Unidentified	Unidentified	0.9971403	CK
B73	H99	B73xH99	9.33086	9.33073	9.15521	9.33079	9.33073	bASV64		-0.0188111	0.0356397		BPH	Bacteria	Actinobacteriota	Actinobacteria	Micrococcales	Intrasporangiaceae	Unidentified	Unidentified	0.9971403	CK
Mo17	W64A	Mo17xW64A	9.5652	9.51044	9.18783	9.53782	9.51044	bASV65		-0.0339217	0.0388047		BPH	Bacteria	Proteobacteria	Alphaproteobacteria	Rhizobiales	Methyloligellaceae	uncultured	Unidentified	0.9817636	CK
Mo17	B73	Mo17xB73	9.5652	9.60176	9.03255	9.58348	9.5652	bASV65		-0.0556856	0.0178019		BPH	Bacteria	Proteobacteria	Alphaproteobacteria	Rhizobiales	Methyloligellaceae	uncultured	Unidentified	0.9817636	CK
B73	H84	B73xH84	9.60176	9.28059	9.12088	9.44117	9.28059	bASV65		-0.0172085	0.0252256		BPH	Bacteria	Proteobacteria	Alphaproteobacteria	Rhizobiales	Methyloligellaceae	uncultured	Unidentified	0.9817636	CK
B73	Oh43	B73xOh43	9.60176	9.43148	9.03087	9.51662	9.43148	bASV65		-0.0424758	0.0275162		BPH	Bacteria	Proteobacteria	Alphaproteobacteria	Rhizobiales	Methyloligellaceae	uncultured	Unidentified	0.9817636	CK
W64A	Oh43	W64AxOh43	9.51044	9.43148	9.2095	9.47096	9.43148	bASV65		-0.0235362	0.0426407		BPH	Bacteria	Proteobacteria	Alphaproteobacteria	Rhizobiales	Methyloligellaceae	uncultured	Unidentified	0.9817636	CK
Mo17	H84	Mo17xH84	9.31938	9.41554	9.63484	9.36746	9.41554	bASV66		0.0232905	0.0493851		BPH	Bacteria	Actinobacteriota	MB-A2-108	MB-A2-108	MB-A2-108	MB-A2-108	uncultured_bacterium	0.9154968	CK
B73	H84	B73xH84	9.36212	9.41554	9.64648	9.38883	9.41554	bASV66		0.0245269	0.0315553		BPH	Bacteria	Actinobacteriota	MB-A2-108	MB-A2-108	MB-A2-108	MB-A2-108	uncultured_bacterium	0.9154968	CK
A554	H84	A554xH84	9.32371	9.41554	9.57214	9.36963	9.41554	bASV66		0.0166321	0.0456304		BPH	Bacteria	Actinobacteriota	MB-A2-108	MB-A2-108	MB-A2-108	MB-A2-108	uncultured_bacterium	0.9154968	CK
B73	Oh43	B73xOh43	9.575	9.61561	9.31429	9.5953	9.575	bASV67		-0.0272282	0.0248087		BPH	Bacteria	Acidobacteriota	Acidobacteriae	Bryobacterales	Bryobacteraceae	Bryobacter	Unidentified	0.9995112	CK
W64A	H84	W64AxH84	9.53508	9.39052	9.12288	9.4628	9.39052	bASV67		-0.0285011	0.0433571		BPH	Bacteria	Acidobacteriota	Acidobacteriae	Bryobacterales	Bryobacteraceae	Bryobacter	Unidentified	0.9995112	CK
Mo17	W64A	Mo17xW64A	9.41468	9.37691	9.13941	9.39579	9.37691	bASV68		-0.0253276	0.0499939		BPH	Bacteria	Proteobacteria	Alphaproteobacteria	Rhizobiales	Rhizobiaceae	Unidentified	Unidentified	0.9962014	CK
Mo17	B73	Mo17xB73	9.41468	9.37698	9.00306	9.39583	9.37698	bASV68		-0.0398764	0.0487323		BPH	Bacteria	Proteobacteria	Alphaproteobacteria	Rhizobiales	Rhizobiaceae	Unidentified	Unidentified	0.9962014	CK
Mo17	H84	Mo17xH84	9.41468	9.4421	9.14718	9.42839	9.41468	bASV68		-0.028413	0.0422913		BPH	Bacteria	Proteobacteria	Alphaproteobacteria	Rhizobiales	Rhizobiaceae	Unidentified	Unidentified	0.9962014	CK
B73	H84	B73xH84	9.37698	9.4421	9.06335	9.40954	9.37698	bASV68		-0.0334465	0.0252256		BPH	Bacteria	Proteobacteria	Alphaproteobacteria	Rhizobiales	Rhizobiaceae	Unidentified	Unidentified	0.9962014	CK
A554	H84	A554xH84	9.47848	9.4421	9.2426	9.46029	9.4421	bASV68		-0.0211285	0.0375516		BPH	Bacteria	Proteobacteria	Alphaproteobacteria	Rhizobiales	Rhizobiaceae	Unidentified	Unidentified	0.9962014	CK
W64A	H84	W64AxH84	9.37691	9.4421	9.24097	9.4095	9.37691	bASV68		-0.014497	0.0210574		BPH	Bacteria	Proteobacteria	Alphaproteobacteria	Rhizobiales	Rhizobiaceae	Unidentified	Unidentified	0.9962014	CK
W64A	H99	W64AxH99	9.37691	9.32221	9.09461	9.34956	9.32221	bASV68		-0.0244148	0.0369342		BPH	Bacteria	Proteobacteria	Alphaproteobacteria	Rhizobiales	Rhizobiaceae	Unidentified	Unidentified	0.9962014	CK
W64A	Oh43	W64AxOh43	9.37691	9.23449	8.99959	9.3057	9.23449	bASV68		-0.0254365	0.036569		BPH	Bacteria	Proteobacteria	Alphaproteobacteria	Rhizobiales	Rhizobiaceae	Unidentified	Unidentified	0.9962014	CK
Mo17	A554	Mo17xA554	9.41468	9.47848	9.19619	9.44658	9.41468	bASV68		-0.0232071	0.0424467		BPH	Bacteria	Proteobacteria	Alphaproteobacteria	Rhizobiales	Rhizobiaceae	Unidentified	Unidentified	0.9962014	CK
W64A	H84	W64AxH84	9.4953	9.47952	9.30427	9.48741	9.47952	bASV69		-0.0184872	0.0320087		BPH	Bacteria	Proteobacteria	Alphaproteobacteria	Rhizobiales	Rhizobiales_Incertae_Sedis	Nordella	Unidentified	0.9999950	CK
Mo17	W64A	Mo17xW64A	9.37086	9.36189	9.20518	9.36638	9.36189	bASV70		-0.0167393	0.0365758		BPH	Bacteria	Actinobacteriota	Thermoleophilia	Solirubrobacterales	Solirubrobacteraceae	Solirubrobacter	Unidentified	0.9999984	CK
A554	H84	A554xH84	9.33551	9.36605	9.5104	9.35078	9.36605	bASV70		0.015412	0.032378		BPH	Bacteria	Actinobacteriota	Thermoleophilia	Solirubrobacterales	Solirubrobacteraceae	Solirubrobacter	Unidentified	0.9999984	CK
A554	Oh43	A554xOh43	9.33551	9.3964	9.12553	9.36596	9.33551	bASV70		-0.022493	0.0390135		BPH	Bacteria	Actinobacteriota	Thermoleophilia	Solirubrobacterales	Solirubrobacteraceae	Solirubrobacter	Unidentified	0.9999984	CK
W64A	H99	W64AxH99	9.36189	9.37241	9.05326	9.36715	9.36189	bASV70		-0.032967	0.0369342		BPH	Bacteria	Actinobacteriota	Thermoleophilia	Solirubrobacterales	Solirubrobacteraceae	Solirubrobacter	Unidentified	0.9999984	CK
Mo17	W64A	Mo17xW64A	9.30009	9.45876	9.7057	9.37943	9.45876	bASV71		0.0261074	0.0419344		BPH	Bacteria	Firmicutes	Bacilli	Bacillales	Unidentified	Unidentified	Unidentified	0.9999752	CK
Mo17	H84	Mo17xH84	9.30009	9.2858	9.57832	9.29294	9.30009	bASV71		0.0299159	0.0216177		BPH	Bacteria	Firmicutes	Bacilli	Bacillales	Unidentified	Unidentified	Unidentified	0.9999752	CK
W64A	H99	W64AxH99	9.45876	9.53543	9.62771	9.49709	9.53543	bASV71		0.00967764	0.0496396		BPH	Bacteria	Firmicutes	Bacilli	Bacillales	Unidentified	Unidentified	Unidentified	0.9999752	CK
Mo17	B73	Mo17xB73	9.50371	9.4077	9.19259	9.45571	9.4077	bASV72		-0.0228657	0.0455981		BPH	Bacteria	Firmicutes	Clostridia	Clostridiales	Clostridiaceae	Clostridium_sensu_stricto_1	Clostridium_vincentii	0.9892718	CK
B73	Oh43	B73xOh43	9.4077	9.31571	9.09273	9.36171	9.31571	bASV72		-0.0239356	0.0403059		BPH	Bacteria	Firmicutes	Clostridia	Clostridiales	Clostridiaceae	Clostridium_sensu_stricto_1	Clostridium_vincentii	0.9892718	CK
Mo17	A554	Mo17xA554	9.50371	9.52365	9.31958	9.51368	9.50371	bASV72		-0.0193743	0.0473048		BPH	Bacteria	Firmicutes	Clostridia	Clostridiales	Clostridiaceae	Clostridium_sensu_stricto_1	Clostridium_vincentii	0.9892718	CK
Mo17	W64A	Mo17xW64A	9.55661	9.51511	9.66079	9.53586	9.55661	bASV73		0.0109008	0.0449604		BPH	Bacteria	Firmicutes	Clostridia	Clostridiales	Clostridiaceae	Clostridium_sensu_stricto_1	Unidentified	0.9999423	CK
Mo17	B73	Mo17xB73	9.55661	9.64438	9.20949	9.6005	9.55661	bASV73		-0.0363222	0.0254331		BPH	Bacteria	Firmicutes	Clostridia	Clostridiales	Clostridiaceae	Clostridium_sensu_stricto_1	Unidentified	0.9999423	CK
Mo17	H84	Mo17xH84	9.55661	9.23095	9.5829	9.39378	9.55661	bASV73		0.00275073	0.0221865		BPH	Bacteria	Firmicutes	Clostridia	Clostridiales	Clostridiaceae	Clostridium_sensu_stricto_1	Unidentified	0.9999423	CK
B73	Oh43	B73xOh43	9.64438	9.53801	9.2806	9.59119	9.53801	bASV73		-0.0269869	0.0269251		BPH	Bacteria	Firmicutes	Clostridia	Clostridiales	Clostridiaceae	Clostridium_sensu_stricto_1	Unidentified	0.9999423	CK
Mo17	W64A	Mo17xW64A	9.4802	9.48694	9.12358	9.48357	9.4802	bASV75		-0.0376169	0.0410326		BPH	Bacteria	Proteobacteria	Alphaproteobacteria	Sphingomonadales	Sphingomonadaceae	Sphingomonas	Unidentified	0.9999794	CK
Mo17	B73	Mo17xB73	9.4802	9.47627	8.89344	9.47824	9.47627	bASV75		-0.0615049	0.0179861		BPH	Bacteria	Proteobacteria	Alphaproteobacteria	Sphingomonadales	Sphingomonadaceae	Sphingomonas	Unidentified	0.9999794	CK
W64A	H99	W64AxH99	9.48694	9.34807	9.23747	9.4175	9.34807	bASV75		-0.0118306	0.0369342		BPH	Bacteria	Proteobacteria	Alphaproteobacteria	Sphingomonadales	Sphingomonadaceae	Sphingomonas	Unidentified	0.9999794	CK
Mo17	A554	Mo17xA554	9.4802	9.49693	9.27403	9.48856	9.4802	bASV75		-0.0217471	0.0235037		BPH	Bacteria	Proteobacteria	Alphaproteobacteria	Sphingomonadales	Sphingomonadaceae	Sphingomonas	Unidentified	0.9999794	CK
Mo17	H99	Mo17xH99	9.4802	9.34807	9.27125	9.41413	9.34807	bASV75		-0.00821675	0.0402735		BPH	Bacteria	Proteobacteria	Alphaproteobacteria	Sphingomonadales	Sphingomonadaceae	Sphingomonas	Unidentified	0.9999794	CK
B73	Oh43	B73xOh43	9.2845	9.24216	9.56064	9.26333	9.2845	bASV76		0.0297421	0.0243495		BPH	Bacteria	Gemmatimonadota	Gemmatimonadetes	Gemmatimonadales	Gemmatimonadaceae	uncultured	uncultured_proteobacterium	0.7863612	CK
A554	Oh43	A554xOh43	9.27063	9.24216	9.40359	9.2564	9.27063	bASV76		0.0143419	0.0390135		BPH	Bacteria	Gemmatimonadota	Gemmatimonadetes	Gemmatimonadales	Gemmatimonadaceae	uncultured	uncultured_proteobacterium	0.7863612	CK
Mo17	W64A	Mo17xW64A	9.22007	9.60341	9.69743	9.41174	9.60341	bASV78		0.00979011	0.0388047		BPH	Bacteria	Verrucomicrobiota	Verrucomicrobiae	Chthoniobacterales	Chthoniobacteraceae	Candidatus_Udaeobacter	Unidentified	0.9999985	CK
Mo17	H84	Mo17xH84	9.22007	9.21765	9.54277	9.21886	9.22007	bASV78		0.0350002	0.0373683		BPH	Bacteria	Verrucomicrobiota	Verrucomicrobiae	Chthoniobacterales	Chthoniobacteraceae	Candidatus_Udaeobacter	Unidentified	0.9999985	CK
B73	H84	B73xH84	9.11879	9.21765	9.61108	9.16822	9.21765	bASV78		0.0426823	0.0229344		BPH	Bacteria	Verrucomicrobiota	Verrucomicrobiae	Chthoniobacterales	Chthoniobacteraceae	Candidatus_Udaeobacter	Unidentified	0.9999985	CK
B73	H99	B73xH99	9.11879	9.07907	9.5285	9.09893	9.11879	bASV78		0.0449303	0.0140438		BPH	Bacteria	Verrucomicrobiota	Verrucomicrobiae	Chthoniobacterales	Chthoniobacteraceae	Candidatus_Udaeobacter	Unidentified	0.9999985	CK
Mo17	H99	Mo17xH99	9.22007	9.07907	9.51034	9.14957	9.22007	bASV78		0.0314822	0.0402735		BPH	Bacteria	Verrucomicrobiota	Verrucomicrobiae	Chthoniobacterales	Chthoniobacteraceae	Candidatus_Udaeobacter	Unidentified	0.9999985	CK
Mo17	Oh43	Mo17xOh43	9.18203	9.18463	9.44221	9.18333	9.18463	bASV79		0.0280448	0.032455		BPH	Bacteria	Gemmatimonadota	Gemmatimonadetes	Gemmatimonadales	Gemmatimonadaceae	uncultured	uncultured_Gemmatimonadales	0.7095704	CK
B73	H99	B73xH99	9.25627	9.21574	9.36605	9.236	9.25627	bASV79		0.0118597	0.0356397		BPH	Bacteria	Gemmatimonadota	Gemmatimonadetes	Gemmatimonadales	Gemmatimonadaceae	uncultured	uncultured_Gemmatimonadales	0.7095704	CK
A554	H99	A554xH99	9.22204	9.21574	9.56462	9.21889	9.22204	bASV79		0.0371472	0.0384502		BPH	Bacteria	Gemmatimonadota	Gemmatimonadetes	Gemmatimonadales	Gemmatimonadaceae	uncultured	uncultured_Gemmatimonadales	0.7095704	CK
Mo17	H84	Mo17xH84	9.1443	9.21161	8.85553	9.17796	9.1443	bASV80		-0.0315797	0.0378969		BPH	Bacteria	Actinobacteriota	MB-A2-108	MB-A2-108	MB-A2-108	MB-A2-108	metagenome	0.7379325	CK
B73	H84	B73xH84	9.31443	9.21161	8.85587	9.26302	9.21161	bASV80		-0.0386178	0.0229344		BPH	Bacteria	Actinobacteriota	MB-A2-108	MB-A2-108	MB-A2-108	MB-A2-108	metagenome	0.7379325	CK
B73	H99	B73xH99	9.31443	9.21718	8.90192	9.26581	9.21718	bASV80		-0.0342034	0.0380374		BPH	Bacteria	Actinobacteriota	MB-A2-108	MB-A2-108	MB-A2-108	MB-A2-108	metagenome	0.7379325	CK
A554	H84	A554xH84	9.22702	9.21161	8.95358	9.21931	9.21161	bASV80		-0.0280111	0.0422685		BPH	Bacteria	Actinobacteriota	MB-A2-108	MB-A2-108	MB-A2-108	MB-A2-108	metagenome	0.7379325	CK
A554	H99	A554xH99	9.22702	9.21718	8.7553	9.2221	9.21718	bASV80		-0.0501101	0.0331973		BPH	Bacteria	Actinobacteriota	MB-A2-108	MB-A2-108	MB-A2-108	MB-A2-108	metagenome	0.7379325	CK
W64A	H99	W64AxH99	9.2516	9.21718	8.87659	9.23439	9.21718	bASV80		-0.0369515	0.0480973		BPH	Bacteria	Actinobacteriota	MB-A2-108	MB-A2-108	MB-A2-108	MB-A2-108	metagenome	0.7379325	CK
Mo17	A554	Mo17xA554	9.1443	9.22702	8.69058	9.18566	9.1443	bASV80		-0.0496182	0.049361		BPH	Bacteria	Actinobacteriota	MB-A2-108	MB-A2-108	MB-A2-108	MB-A2-108	metagenome	0.7379325	CK
Mo17	H99	Mo17xH99	9.1443	9.21718	8.81596	9.18074	9.1443	bASV80		-0.0359066	0.049811		BPH	Bacteria	Actinobacteriota	MB-A2-108	MB-A2-108	MB-A2-108	MB-A2-108	metagenome	0.7379325	CK
B73	Oh43	B73xOh43	9.18995	9.33183	9.45139	9.26089	9.33183	bASV82		0.0128123	0.0275162		BPH	Bacteria	Actinobacteriota	Thermoleophilia	Gaiellales	Gaiellaceae	Gaiella	actinobacterium_WWH12	0.8495998	CK
A554	Oh43	A554xOh43	9.29922	9.33183	9.48814	9.31552	9.33183	bASV82		0.0167508	0.0382421		BPH	Bacteria	Actinobacteriota	Thermoleophilia	Gaiellales	Gaiellaceae	Gaiella	actinobacterium_WWH12	0.8495998	CK
Mo17	H84	Mo17xH84	9.28387	9.32467	9.2286	9.30427	9.28387	bASV83		-0.00595328	0.0458145		BPH	Bacteria	Actinobacteriota	Thermoleophilia	Solirubrobacterales	67-14	67-14	uncultured_Rubrobacteria	0.9472824	CK
B73	Oh43	B73xOh43	9.22213	9.18292	9.40867	9.20253	9.22213	bASV83		0.0202274	0.0214227		BPH	Bacteria	Actinobacteriota	Thermoleophilia	Solirubrobacterales	67-14	67-14	uncultured_Rubrobacteria	0.9472824	CK
Mo17	H99	Mo17xH99	9.28387	9.29951	9.15614	9.29169	9.28387	bASV83		-0.0137586	0.0218081		BPH	Bacteria	Actinobacteriota	Thermoleophilia	Solirubrobacterales	67-14	67-14	uncultured_Rubrobacteria	0.9472824	CK
W64A	H84	W64AxH84	9.3236	9.3393	9.42244	9.33145	9.3393	bASV84		0.0089018	0.0466541		BPH	Bacteria	Proteobacteria	Gammaproteobacteria	Burkholderiales	SC-I-84	SC-I-84	Unidentified	0.9999998	CK
Mo17	Oh43	Mo17xOh43	9.25667	9.1001	8.97272	9.17838	9.1001	bASV85		-0.0139983	0.0428318		BPH	Bacteria	Actinobacteriota	Thermoleophilia	Gaiellales	uncultured	uncultured	uncultured_actinobacterium	0.9697572	CK
Mo17	B73	Mo17xB73	9.25667	9.25238	8.96947	9.25452	9.25238	bASV85		-0.030577	0.0221064		BPH	Bacteria	Actinobacteriota	Thermoleophilia	Gaiellales	uncultured	uncultured	uncultured_actinobacterium	0.9697572	CK
B73	Oh43	B73xOh43	9.25238	9.1001	9.37531	9.17624	9.25238	bASV85		0.0132861	0.0164802		BPH	Bacteria	Actinobacteriota	Thermoleophilia	Gaiellales	uncultured	uncultured	uncultured_actinobacterium	0.9697572	CK
W64A	H84	W64AxH84	9.16001	9.29306	9.38624	9.22653	9.29306	bASV85		0.0100268	0.0466541		BPH	Bacteria	Actinobacteriota	Thermoleophilia	Gaiellales	uncultured	uncultured	uncultured_actinobacterium	0.9697572	CK
W64A	Oh43	W64AxOh43	9.16001	9.1001	8.98689	9.13005	9.1001	bASV85		-0.0124407	0.0484656		BPH	Bacteria	Actinobacteriota	Thermoleophilia	Gaiellales	uncultured	uncultured	uncultured_actinobacterium	0.9697572	CK
Mo17	A554	Mo17xA554	9.25667	9.24127	9.08779	9.24897	9.24127	bASV85		-0.0166089	0.0424467		BPH	Bacteria	Actinobacteriota	Thermoleophilia	Gaiellales	uncultured	uncultured	uncultured_actinobacterium	0.9697572	CK
Mo17	B73	Mo17xB73	9.35194	9.28973	9.02782	9.32084	9.28973	bASV86		-0.0281938	0.0179861		BPH	Bacteria	Proteobacteria	Alphaproteobacteria	Dongiales	Dongiaceae	Dongia	uncultured_bacterium	0.7107435	CK
B73	H84	B73xH84	9.28973	9.35752	9.00792	9.32363	9.28973	bASV86		-0.0303362	0.033464		BPH	Bacteria	Proteobacteria	Alphaproteobacteria	Dongiales	Dongiaceae	Dongia	uncultured_bacterium	0.7107435	CK
Mo17	W64A	Mo17xW64A	9.07802	9.28323	9.48615	9.18063	9.28323	bASV87		0.0218586	0.0306488		BPH	Bacteria	Firmicutes	Bacilli	Bacillales	Bacillaceae	Bacillus	Unidentified	0.9173171	CK
Mo17	H84	Mo17xH84	9.07802	9.13927	9.46924	9.10865	9.13927	bASV87		0.0361046	0.0144644		BPH	Bacteria	Firmicutes	Bacilli	Bacillales	Bacillaceae	Bacillus	Unidentified	0.9173171	CK
A554	Oh43	A554xOh43	9.35382	9.59898	9.41099	9.4764	9.59898	bASV87	-0.00690278			0.0491564	MPH	Bacteria	Firmicutes	Bacilli	Bacillales	Bacillaceae	Bacillus	Unidentified	0.9173171	CK
Mo17	H99	Mo17xH99	9.34043	9.1848	9.49526	9.26262	9.34043	bASV89		0.0165759	0.0302977		BPH	Bacteria	Proteobacteria	Gammaproteobacteria	PLTA13	PLTA13	PLTA13	metagenome	0.8743174	CK
Mo17	W64A	Mo17xW64A	9.32746	9.17108	9.07122	9.24927	9.17108	bASV90		-0.010888	0.0488734		BPH	Bacteria	Actinobacteriota	Actinobacteria	Streptosporangiales	Streptosporangiaceae	Streptosporangium	Unidentified	0.9999909	CK
B73	Oh43	B73xOh43	9.31074	9.12743	9.29983	9.21908	9.31074	bASV90	0.00875865			0.0424569	MPH	Bacteria	Actinobacteriota	Actinobacteria	Streptosporangiales	Streptosporangiaceae	Streptosporangium	Unidentified	0.9999909	CK
W64A	H84	W64AxH84	9.17108	9.18237	9.39439	9.17672	9.18237	bASV90		0.0230899	0.0466541		BPH	Bacteria	Actinobacteriota	Actinobacteria	Streptosporangiales	Streptosporangiaceae	Streptosporangium	Unidentified	0.9999909	CK
B73	H84	B73xH84	9.33592	9.38448	9.13049	9.3602	9.33592	bASV92		-0.0220042	0.0371249		BPH	Bacteria	Myxococcota	bacteriap25	bacteriap25	bacteriap25	bacteriap25	Unidentified	0.7096585	CK
W64A	H84	W64AxH84	9.18528	9.38448	9.04065	9.28488	9.18528	bASV92		-0.0157462	0.0466541		BPH	Bacteria	Myxococcota	bacteriap25	bacteriap25	bacteriap25	bacteriap25	Unidentified	0.7096585	CK
Mo17	A554	Mo17xA554	9.39075	9.33192	9.15805	9.36134	9.33192	bASV92		-0.0186325	0.0424467		BPH	Bacteria	Myxococcota	bacteriap25	bacteriap25	bacteriap25	bacteriap25	Unidentified	0.7096585	CK
Mo17	W64A	Mo17xW64A	9.16115	9.44664	9.63471	9.30389	9.44664	bASV93		0.0199087	0.0410326		BPH	Bacteria	Verrucomicrobiota	Verrucomicrobiae	Chthoniobacterales	Chthoniobacteraceae	Candidatus_Udaeobacter	Unidentified	0.9999993	CK
Mo17	B73	Mo17xB73	9.16115	9.13245	9.84715	9.1468	9.16115	bASV93		0.0748815	0.0400484		BPH	Bacteria	Verrucomicrobiota	Verrucomicrobiae	Chthoniobacterales	Chthoniobacteraceae	Candidatus_Udaeobacter	Unidentified	0.9999993	CK
Mo17	H84	Mo17xH84	9.16115	9.20461	9.53093	9.18288	9.20461	bASV93		0.0354517	0.0223723		BPH	Bacteria	Verrucomicrobiota	Verrucomicrobiae	Chthoniobacterales	Chthoniobacteraceae	Candidatus_Udaeobacter	Unidentified	0.9999993	CK
B73	H84	B73xH84	9.13245	9.20461	9.43608	9.16853	9.20461	bASV93		0.0251467	0.0492344		BPH	Bacteria	Verrucomicrobiota	Verrucomicrobiae	Chthoniobacterales	Chthoniobacteraceae	Candidatus_Udaeobacter	Unidentified	0.9999993	CK
B73	H99	B73xH99	9.13245	8.83248	9.52932	8.98247	9.13245	bASV93		0.0434572	0.0140438		BPH	Bacteria	Verrucomicrobiota	Verrucomicrobiae	Chthoniobacterales	Chthoniobacteraceae	Candidatus_Udaeobacter	Unidentified	0.9999993	CK
Mo17	H99	Mo17xH99	9.16115	8.83248	9.5835	8.99681	9.16115	bASV93		0.0461026	0.0274141		BPH	Bacteria	Verrucomicrobiota	Verrucomicrobiae	Chthoniobacterales	Chthoniobacteraceae	Candidatus_Udaeobacter	Unidentified	0.9999993	CK
B73	Oh43	B73xOh43	9.22314	9.70593	9.66258	9.46453	9.70593	bASV94	0.0209248			0.0282448	MPH	Bacteria	Actinobacteriota	MB-A2-108	MB-A2-108	MB-A2-108	MB-A2-108	Unidentified	0.9999996	CK
B73	Oh43	B73xOh43	9.17296	8.99522	9.39287	9.08409	9.17296	bASV95		0.0239739	0.0384236		BPH	Bacteria	Actinobacteriota	Thermoleophilia	Gaiellales	Gaiellaceae	Gaiella	Unidentified	0.9994041	CK
Mo17	B73	Mo17xB73	9.31362	9.23379	8.68066	9.27371	9.23379	bASV96		-0.0599028	0.0390233		BPH	Bacteria	Actinobacteriota	Actinobacteria	Propionibacteriales	Propionibacteriaceae	Microlunatus	uncultured_bacterium	0.7052516	CK
B73	Oh43	B73xOh43	9.23379	9.26336	9.46044	9.24858	9.26336	bASV96		0.0212749	0.0309753		BPH	Bacteria	Actinobacteriota	Actinobacteria	Propionibacteriales	Propionibacteriaceae	Microlunatus	uncultured_bacterium	0.7052516	CK
A554	H84	A554xH84	8.82015	9.35252	9.24719	9.08634	9.35252	bASV96	0.0177023			0.037686	MPH	Bacteria	Actinobacteriota	Actinobacteria	Propionibacteriales	Propionibacteriaceae	Microlunatus	uncultured_bacterium	0.7052516	CK
A554	H99	A554xH99	8.82015	9.07571	9.2223	8.94793	9.07571	bASV96		0.0161515	0.0435489		BPH	Bacteria	Actinobacteriota	Actinobacteria	Propionibacteriales	Propionibacteriaceae	Microlunatus	uncultured_bacterium	0.7052516	CK
W64A	H99	W64AxH99	9.15162	9.07571	9.47628	9.11367	9.15162	bASV96		0.0354754	0.0481151		BPH	Bacteria	Actinobacteriota	Actinobacteria	Propionibacteriales	Propionibacteriaceae	Microlunatus	uncultured_bacterium	0.7052516	CK
Mo17	B73	Mo17xB73	9.22469	9.23569	8.78436	9.23019	9.22469	bASV97		-0.0477341	0.0390233		BPH	Bacteria	Proteobacteria	Alphaproteobacteria	Rhizobiales	Rhizobiaceae	Mesorhizobium	Unidentified	0.7039288	CK
A554	H84	A554xH84	9.12036	9.03902	8.99175	9.07969	9.03902	bASV97		-0.00522903	0.0422685		BPH	Bacteria	Proteobacteria	Alphaproteobacteria	Rhizobiales	Rhizobiaceae	Mesorhizobium	Unidentified	0.7039288	CK
Mo17	Oh43	Mo17xOh43	9.28334	9.47079	9.41985	9.37706	9.47079	bASV98	0.00456315			0.0385093	MPH	Bacteria	Proteobacteria	Gammaproteobacteria	Burkholderiales	Comamonadaceae	Unidentified	Unidentified	0.9999999	CK
Mo17	W64A	Mo17xW64A	9.28334	9.16583	9.36731	9.22458	9.28334	bASV98		0.00904584	0.0410326		BPH	Bacteria	Proteobacteria	Gammaproteobacteria	Burkholderiales	Comamonadaceae	Unidentified	Unidentified	0.9999999	CK
Mo17	B73	Mo17xB73	9.28334	9.23426	9.53363	9.2588	9.28334	bASV98		0.0269615	0.0455981		BPH	Bacteria	Proteobacteria	Gammaproteobacteria	Burkholderiales	Comamonadaceae	Unidentified	Unidentified	0.9999999	CK
A554	H99	A554xH99	9.21957	9.35503	9.53569	9.2873	9.35503	bASV98		0.0193113	0.0430496		BPH	Bacteria	Proteobacteria	Gammaproteobacteria	Burkholderiales	Comamonadaceae	Unidentified	Unidentified	0.9999999	CK
W64A	Oh43	W64AxOh43	9.16583	9.47079	9.3973	9.31831	9.47079	bASV98	0.00847672			0.0265752	MPH	Bacteria	Proteobacteria	Gammaproteobacteria	Burkholderiales	Comamonadaceae	Unidentified	Unidentified	0.9999999	CK
Mo17	B73	Mo17xB73	8.90349	9.00439	9.35909	8.95394	9.00439	bASV100		0.039392	0.0221064		BPH	Bacteria	Acidobacteriota	Vicinamibacteria	Vicinamibacterales	Vicinamibacteraceae	Vicinamibacteraceae	Unidentified	0.9998561	CK
Mo17	H84	Mo17xH84	8.95159	9.16821	8.83131	9.0599	8.95159	bASV101		-0.0134375	0.0383508		BPH	Bacteria	Methylomirabilota	Methylomirabilia	Rokubacteriales	Rokubacteriales	Rokubacteriales	metagenome	0.8077180	CK
A554	H84	A554xH84	9.06744	9.16821	8.89259	9.11783	9.06744	bASV101		-0.0192835	0.0456304		BPH	Bacteria	Methylomirabilota	Methylomirabilia	Rokubacteriales	Rokubacteriales	Rokubacteriales	metagenome	0.8077180	CK
A554	Oh43	A554xOh43	9.06744	8.94538	8.83881	9.00641	8.94538	bASV101		-0.0119133	0.0454073		BPH	Bacteria	Methylomirabilota	Methylomirabilia	Rokubacteriales	Rokubacteriales	Rokubacteriales	metagenome	0.8077180	CK
W64A	H84	W64AxH84	9.12435	9.16821	9.29515	9.14628	9.16821	bASV101		0.0138455	0.0466541		BPH	Bacteria	Methylomirabilota	Methylomirabilia	Rokubacteriales	Rokubacteriales	Rokubacteriales	metagenome	0.8077180	CK
Mo17	H84	Mo17xH84	9.2638	9.30408	9.18092	9.28394	9.2638	bASV102		-0.00894667	0.0497682		BPH	Bacteria	Proteobacteria	Gammaproteobacteria	Burkholderiales	SC-I-84	SC-I-84	Unidentified	0.9999991	CK
Mo17	H84	Mo17xH84	9.23999	9.19639	8.95045	9.21819	9.19639	bASV103		-0.0267433	0.0221865		BPH	Bacteria	Proteobacteria	Alphaproteobacteria	Rhizobiales	Xanthobacteraceae	Unidentified	Unidentified	0.9998676	CK
A554	H84	A554xH84	9.10765	9.19639	9.37576	9.15202	9.19639	bASV103		0.0195044	0.0454982		BPH	Bacteria	Proteobacteria	Alphaproteobacteria	Rhizobiales	Xanthobacteraceae	Unidentified	Unidentified	0.9998676	CK
Mo17	H84	Mo17xH84	9.38145	9.42964	9.23332	9.40555	9.38145	bASV104		-0.0157899	0.0240181		BPH	Bacteria	Actinobacteriota	Thermoleophilia	Gaiellales	Gaiellaceae	Gaiella	Unidentified	0.9959326	CK
B73	H84	B73xH84	9.27401	9.42964	9.09438	9.35183	9.27401	bASV104		-0.019369	0.036488		BPH	Bacteria	Actinobacteriota	Thermoleophilia	Gaiellales	Gaiellaceae	Gaiella	Unidentified	0.9959326	CK
B73	H99	B73xH99	9.27401	9.28882	9.15444	9.28141	9.27401	bASV104		-0.0128928	0.04127		BPH	Bacteria	Actinobacteriota	Thermoleophilia	Gaiellales	Gaiellaceae	Gaiella	Unidentified	0.9959326	CK
B73	Oh43	B73xOh43	9.27401	9.19904	9.35099	9.23653	9.27401	bASV104		0.00830016	0.0421582		BPH	Bacteria	Actinobacteriota	Thermoleophilia	Gaiellales	Gaiellaceae	Gaiella	Unidentified	0.9959326	CK
A554	H84	A554xH84	9.34886	9.42964	9.19613	9.38925	9.34886	bASV104		-0.0163365	0.0481693		BPH	Bacteria	Actinobacteriota	Thermoleophilia	Gaiellales	Gaiellaceae	Gaiella	Unidentified	0.9959326	CK
Mo17	B73	Mo17xB73	9.34708	9.20644	8.75364	9.27676	9.20644	bASV105		-0.0491826	0.0179861		BPH	Bacteria	Actinobacteriota	Actinobacteria	Propionibacteriales	Propionibacteriaceae	Microlunatus	Unidentified	0.9991135	CK
W64A	H99	W64AxH99	9.15403	9.08902	9.3881	9.12153	9.15403	bASV105		0.0255705	0.0459704		BPH	Bacteria	Actinobacteriota	Actinobacteria	Propionibacteriales	Propionibacteriaceae	Microlunatus	Unidentified	0.9991135	CK
Mo17	W64A	Mo17xW64A	9.30778	9.18087	9.46478	9.24433	9.30778	bASV106		0.016867	0.0424628		BPH	Bacteria	Proteobacteria	Gammaproteobacteria	Gammaproteobacteria_Incertae_Sedis	Unknown_Family	Acidibacter	Unidentified	0.9985690	CK
Mo17	B73	Mo17xB73	9.30778	9.22966	9.51608	9.26872	9.30778	bASV106		0.0223787	0.0496567		BPH	Bacteria	Proteobacteria	Gammaproteobacteria	Gammaproteobacteria_Incertae_Sedis	Unknown_Family	Acidibacter	Unidentified	0.9985690	CK
A554	H84	A554xH84	9.22286	9.30848	9.40418	9.26567	9.30848	bASV106		0.0102813	0.0377854		BPH	Bacteria	Proteobacteria	Gammaproteobacteria	Gammaproteobacteria_Incertae_Sedis	Unknown_Family	Acidibacter	Unidentified	0.9985690	CK
Mo17	W64A	Mo17xW64A	9.26516	9.11632	9.70379	9.19074	9.26516	bASV107		0.0473428	0.00539759		BPH	Bacteria	Bacteroidota	Bacteroidia	Chitinophagales	Chitinophagaceae	uncultured	Unidentified	0.7784866	CK
B73	H99	B73xH99	9.08818	9.07303	9.51029	9.08061	9.08818	bASV107		0.0464458	0.0265038		BPH	Bacteria	Bacteroidota	Bacteroidia	Chitinophagales	Chitinophagaceae	uncultured	Unidentified	0.7784866	CK
A554	H84	A554xH84	9.06262	9.03492	9.31684	9.04877	9.06262	bASV107		0.0280505	0.0183365		BPH	Bacteria	Bacteroidota	Bacteroidia	Chitinophagales	Chitinophagaceae	uncultured	Unidentified	0.7784866	CK
A554	H99	A554xH99	9.06262	9.07303	9.69019	9.06783	9.07303	bASV107		0.0680214	0.030054		BPH	Bacteria	Bacteroidota	Bacteroidia	Chitinophagales	Chitinophagaceae	uncultured	Unidentified	0.7784866	CK
W64A	H99	W64AxH99	9.11632	9.07303	9.43145	9.09467	9.11632	bASV107		0.0345679	0.0369342		BPH	Bacteria	Bacteroidota	Bacteroidia	Chitinophagales	Chitinophagaceae	uncultured	Unidentified	0.7784866	CK
Mo17	A554	Mo17xA554	9.26516	9.06262	9.45439	9.16389	9.26516	bASV107		0.0204238	0.0424467		BPH	Bacteria	Bacteroidota	Bacteroidia	Chitinophagales	Chitinophagaceae	uncultured	Unidentified	0.7784866	CK
Mo17	B73	Mo17xB73	9.08113	9.13424	9.21734	9.10769	9.13424	bASV108		0.0090976	0.0436436		BPH	Bacteria	Actinobacteriota	Thermoleophilia	Solirubrobacterales	67-14	67-14	uncultured_actinobacterium	0.7314041	CK
B73	H99	B73xH99	9.13424	9.24633	8.88484	9.19029	9.13424	bASV108		-0.027304	0.04127		BPH	Bacteria	Actinobacteriota	Thermoleophilia	Solirubrobacterales	67-14	67-14	uncultured_actinobacterium	0.7314041	CK
A554	H99	A554xH99	9.08422	9.24633	9.05612	9.16528	9.08422	bASV108		-0.00309379	0.030054		BPH	Bacteria	Actinobacteriota	Thermoleophilia	Solirubrobacterales	67-14	67-14	uncultured_actinobacterium	0.7314041	CK
Mo17	H99	Mo17xH99	9.08113	9.24633	8.84737	9.16373	9.08113	bASV108		-0.0257413	0.0254097		BPH	Bacteria	Actinobacteriota	Thermoleophilia	Solirubrobacterales	67-14	67-14	uncultured_actinobacterium	0.7314041	CK
B73	Oh43	B73xOh43	9.46398	9.47521	8.91595	9.46959	9.46398	bASV110		-0.0579065	0.0275162		BPH	Bacteria	Firmicutes	Bacilli	Bacillales	Bacillaceae	Bacillus	Unidentified	0.9868952	CK
W64A	H84	W64AxH84	9.4299	9.63874	9.08372	9.53432	9.4299	bASV110		-0.0367113	0.0488781		BPH	Bacteria	Firmicutes	Bacilli	Bacillales	Bacillaceae	Bacillus	Unidentified	0.9868952	CK
B73	Oh43	B73xOh43	9.01443	9.02272	9.43577	9.01857	9.02272	bASV111		0.0457798	0.0248389		BPH	Bacteria	Actinobacteriota	Actinobacteria	Propionibacteriales	Nocardioidaceae	Unidentified	Unidentified	0.9998664	CK
W64A	H84	W64AxH84	9.1538	9.23597	9.40422	9.19489	9.23597	bASV111		0.0182164	0.0488781		BPH	Bacteria	Actinobacteriota	Actinobacteria	Propionibacteriales	Nocardioidaceae	Unidentified	Unidentified	0.9998664	CK
Mo17	Oh43	Mo17xOh43	9.14491	9.22141	8.94438	9.18316	9.14491	bASV112		-0.0219273	0.037331		BPH	Bacteria	Actinobacteriota	Actinobacteria	Propionibacteriales	Nocardioidaceae	Kribbella	Unidentified	1.0000000	CK
A554	Oh43	A554xOh43	9.07095	8.81948	9.06125	8.94522	9.07095	bASV114	0.0129718			0.0378338	MPH	Bacteria	Actinobacteriota	Thermoleophilia	Gaiellales	Gaiellaceae	Gaiella	Unidentified	0.9925168	CK
Mo17	W64A	Mo17xW64A	9.05162	9.05059	8.82056	9.0511	9.05059	bASV115		-0.025416	0.0410326		BPH	Bacteria	Actinobacteriota	Thermoleophilia	Gaiellales	Gaiellaceae	Gaiella	Unidentified	0.9994444	CK
B73	Oh43	B73xOh43	8.97986	8.9587	9.17365	8.96928	8.97986	bASV115		0.0215808	0.0275162		BPH	Bacteria	Actinobacteriota	Thermoleophilia	Gaiellales	Gaiellaceae	Gaiella	Unidentified	0.9994444	CK
Mo17	B73	Mo17xB73	9.14887	9.13379	8.6902	9.14133	9.13379	bASV116		-0.0485653	0.0226212		BPH	Bacteria	Proteobacteria	Alphaproteobacteria	Rhizobiales	Methyloligellaceae	uncultured	metagenome	0.9179796	CK
A554	H99	A554xH99	9.03011	9.16174	8.86557	9.09592	9.03011	bASV116		-0.018221	0.030054		BPH	Bacteria	Proteobacteria	Alphaproteobacteria	Rhizobiales	Methyloligellaceae	uncultured	metagenome	0.9179796	CK
W64A	H99	W64AxH99	9.15869	9.16174	8.95038	9.16022	9.15869	bASV116		-0.022745	0.0481151		BPH	Bacteria	Proteobacteria	Alphaproteobacteria	Rhizobiales	Methyloligellaceae	uncultured	metagenome	0.9179796	CK
W64A	Oh43	W64AxOh43	9.15869	9.13863	8.86089	9.14866	9.13863	bASV116		-0.0303913	0.0346947		BPH	Bacteria	Proteobacteria	Alphaproteobacteria	Rhizobiales	Methyloligellaceae	uncultured	metagenome	0.9179796	CK
Mo17	A554	Mo17xA554	9.14887	9.03011	8.97385	9.08949	9.03011	bASV116		-0.00622992	0.0424467		BPH	Bacteria	Proteobacteria	Alphaproteobacteria	Rhizobiales	Methyloligellaceae	uncultured	metagenome	0.9179796	CK
Mo17	Oh43	Mo17xOh43	9.17651	9.02829	8.73691	9.1024	9.02829	bASV117		-0.0322742	0.032455		BPH	Bacteria	Proteobacteria	Alphaproteobacteria	Sphingomonadales	Sphingomonadaceae	Sphingomonas	Unidentified	0.9937299	CK
Mo17	B73	Mo17xB73	9.17651	9.08145	8.71325	9.12898	9.08145	bASV117		-0.0405444	0.033644		BPH	Bacteria	Proteobacteria	Alphaproteobacteria	Sphingomonadales	Sphingomonadaceae	Sphingomonas	Unidentified	0.9937299	CK
Mo17	H84	Mo17xH84	9.17651	9.23656	9.00582	9.20653	9.17651	bASV117		-0.0186	0.0295871		BPH	Bacteria	Proteobacteria	Alphaproteobacteria	Sphingomonadales	Sphingomonadaceae	Sphingomonas	Unidentified	0.9937299	CK
B73	Oh43	B73xOh43	9.08145	9.02829	9.19225	9.05487	9.08145	bASV117		0.0121999	0.0424201		BPH	Bacteria	Proteobacteria	Alphaproteobacteria	Sphingomonadales	Sphingomonadaceae	Sphingomonas	Unidentified	0.9937299	CK
A554	H84	A554xH84	9.20667	9.23656	8.96518	9.22161	9.20667	bASV117		-0.0262292	0.0358413		BPH	Bacteria	Proteobacteria	Alphaproteobacteria	Sphingomonadales	Sphingomonadaceae	Sphingomonas	Unidentified	0.9937299	CK
A554	H99	A554xH99	9.20667	9.08615	9.00259	9.14641	9.08615	bASV117		-0.00919667	0.0333719		BPH	Bacteria	Proteobacteria	Alphaproteobacteria	Sphingomonadales	Sphingomonadaceae	Sphingomonas	Unidentified	0.9937299	CK
Mo17	Oh43	Mo17xOh43	8.69254	9.04755	9.14379	8.87005	9.04755	bASV119		0.0106371	0.046855		BPH	Bacteria	Acidobacteriota	Vicinamibacteria	Vicinamibacterales	Vicinamibacteraceae	Vicinamibacteraceae	Unidentified	0.9998268	CK
A554	Oh43	A554xOh43	9.02385	9.04755	9.2174	9.0357	9.04755	bASV119		0.0187724	0.0454073		BPH	Bacteria	Acidobacteriota	Vicinamibacteria	Vicinamibacterales	Vicinamibacteraceae	Vicinamibacteraceae	Unidentified	0.9998268	CK
W64A	Oh43	W64AxOh43	9.09296	9.04755	9.2717	9.07026	9.09296	bASV119		0.0196564	0.0443715		BPH	Bacteria	Acidobacteriota	Vicinamibacteria	Vicinamibacterales	Vicinamibacteraceae	Vicinamibacteraceae	Unidentified	0.9998268	CK
Mo17	B73	Mo17xB73	9.09199	9.12263	8.57461	9.10731	9.09199	bASV120		-0.0569045	0.0430838		BPH	Bacteria	Actinobacteriota	Actinobacteria	Streptomycetales	Streptomycetaceae	Streptomyces	Unidentified	0.9999660	CK
W64A	H84	W64AxH84	9.01406	9.0446	9.13107	9.02933	9.0446	bASV120		0.00955967	0.0379249		BPH	Bacteria	Actinobacteriota	Actinobacteria	Streptomycetales	Streptomycetaceae	Streptomyces	Unidentified	0.9999660	CK
Mo17	B73	Mo17xB73	8.74957	8.94916	9.30749	8.84936	8.94916	bASV124		0.0400404	0.0365518		BPH	Bacteria	Acidobacteriota	Vicinamibacteria	Vicinamibacterales	Vicinamibacteraceae	Vicinamibacteraceae	Unidentified	0.7796684	CK
A554	H99	A554xH99	9.32819	9.29344	9.10552	9.31081	9.29344	bASV124		-0.0202207	0.030054		BPH	Bacteria	Acidobacteriota	Vicinamibacteria	Vicinamibacterales	Vicinamibacteraceae	Vicinamibacteraceae	Unidentified	0.7796684	CK
A554	H84	A554xH84	9.12406	9.23673	8.98583	9.1804	9.12406	bASV126		-0.0151497	0.0434953		BPH	Bacteria	Proteobacteria	Alphaproteobacteria	Rhizobiales	Beijerinckiaceae	Microvirga	Unidentified	0.9962443	CK
W64A	H99	W64AxH99	9.10352	9.11406	8.93043	9.10879	9.10352	bASV126		-0.0190131	0.0372057		BPH	Bacteria	Proteobacteria	Alphaproteobacteria	Rhizobiales	Beijerinckiaceae	Microvirga	Unidentified	0.9962443	CK
Mo17	A554	Mo17xA554	9.14281	9.12406	8.97225	9.13344	9.12406	bASV126		-0.0166387	0.0423011		BPH	Bacteria	Proteobacteria	Alphaproteobacteria	Rhizobiales	Beijerinckiaceae	Microvirga	Unidentified	0.9962443	CK
Mo17	H99	Mo17xH99	9.14281	9.11406	8.96869	9.12844	9.11406	bASV126		-0.0159498	0.0390093		BPH	Bacteria	Proteobacteria	Alphaproteobacteria	Rhizobiales	Beijerinckiaceae	Microvirga	Unidentified	0.9962443	CK
Mo17	W64A	Mo17xW64A	9.22831	9.13856	9.36244	9.18343	9.22831	bASV127		0.0145346	0.0336554		BPH	Bacteria	Acidobacteriota	Acidobacteriae	Bryobacterales	Bryobacteraceae	Bryobacter	Unidentified	0.9994406	CK
Mo17	B73	Mo17xB73	9.22831	9.14925	8.99567	9.18878	9.14925	bASV127		-0.0167857	0.0478303		BPH	Bacteria	Acidobacteriota	Acidobacteriae	Bryobacterales	Bryobacteraceae	Bryobacter	Unidentified	0.9994406	CK
B73	H99	B73xH99	9.14925	8.94828	9.26027	9.04876	9.14925	bASV127		0.0121345	0.0288334		BPH	Bacteria	Acidobacteriota	Acidobacteriae	Bryobacterales	Bryobacteraceae	Bryobacter	Unidentified	0.9994406	CK
B73	Oh43	B73xOh43	9.14925	9.30774	8.87182	9.22849	9.14925	bASV127		-0.0303219	0.0275162		BPH	Bacteria	Acidobacteriota	Acidobacteriae	Bryobacterales	Bryobacteraceae	Bryobacter	Unidentified	0.9994406	CK
W64A	H99	W64AxH99	9.13856	8.94828	9.22315	9.04342	9.13856	bASV127		0.00925639	0.0381684		BPH	Bacteria	Acidobacteriota	Acidobacteriae	Bryobacterales	Bryobacteraceae	Bryobacter	Unidentified	0.9994406	CK
Mo17	Oh43	Mo17xOh43	8.95684	9.33058	9.7961	9.14371	9.33058	bASV128		0.0498922	0.046855		BPH	Bacteria	Verrucomicrobiota	Verrucomicrobiae	Chthoniobacterales	Xiphinematobacteraceae	Candidatus_Xiphinematobacter	uncultured_bacterium	0.8430752	CK
Mo17	W64A	Mo17xW64A	8.95684	9.20494	9.52634	9.08089	9.20494	bASV128		0.034916	0.0410326		BPH	Bacteria	Verrucomicrobiota	Verrucomicrobiae	Chthoniobacterales	Xiphinematobacteraceae	Candidatus_Xiphinematobacter	uncultured_bacterium	0.8430752	CK
Mo17	B73	Mo17xB73	8.95684	8.81114	9.8985	8.88399	8.95684	bASV128		0.105133	0.0254331		BPH	Bacteria	Verrucomicrobiota	Verrucomicrobiae	Chthoniobacterales	Xiphinematobacteraceae	Candidatus_Xiphinematobacter	uncultured_bacterium	0.8430752	CK
Mo17	H84	Mo17xH84	8.95684	8.9339	9.38097	8.94537	8.95684	bASV128		0.0473525	0.027664		BPH	Bacteria	Verrucomicrobiota	Verrucomicrobiae	Chthoniobacterales	Xiphinematobacteraceae	Candidatus_Xiphinematobacter	uncultured_bacterium	0.8430752	CK
B73	H84	B73xH84	8.81114	8.9339	9.56909	8.87252	8.9339	bASV128		0.0710996	0.0124675		BPH	Bacteria	Verrucomicrobiota	Verrucomicrobiae	Chthoniobacterales	Xiphinematobacteraceae	Candidatus_Xiphinematobacter	uncultured_bacterium	0.8430752	CK
B73	H99	B73xH99	8.81114	8.93269	9.41093	8.87192	8.93269	bASV128		0.0535378	0.0140438		BPH	Bacteria	Verrucomicrobiota	Verrucomicrobiae	Chthoniobacterales	Xiphinematobacteraceae	Candidatus_Xiphinematobacter	uncultured_bacterium	0.8430752	CK
A554	H99	A554xH99	9.35048	8.93269	9.655	9.14159	9.35048	bASV128		0.0325666	0.0474604		BPH	Bacteria	Verrucomicrobiota	Verrucomicrobiae	Chthoniobacterales	Xiphinematobacteraceae	Candidatus_Xiphinematobacter	uncultured_bacterium	0.8430752	CK
W64A	H84	W64AxH84	9.20494	8.9339	8.99593	9.06942	9.20494	bASV128	-0.00810264			0.0475994	MPH	Bacteria	Verrucomicrobiota	Verrucomicrobiae	Chthoniobacterales	Xiphinematobacteraceae	Candidatus_Xiphinematobacter	uncultured_bacterium	0.8430752	CK
W64A	Oh43	W64AxOh43	9.20494	9.33058	9.67315	9.26776	9.33058	bASV128		0.0367153	0.0299102		BPH	Bacteria	Verrucomicrobiota	Verrucomicrobiae	Chthoniobacterales	Xiphinematobacteraceae	Candidatus_Xiphinematobacter	uncultured_bacterium	0.8430752	CK
Mo17	A554	Mo17xA554	8.95684	9.35048	9.68914	9.15366	9.35048	bASV128		0.0362182	0.0457855		BPH	Bacteria	Verrucomicrobiota	Verrucomicrobiae	Chthoniobacterales	Xiphinematobacteraceae	Candidatus_Xiphinematobacter	uncultured_bacterium	0.8430752	CK
Mo17	H99	Mo17xH99	8.95684	8.93269	9.4326	8.94477	8.95684	bASV128		0.0531163	0.0375846		BPH	Bacteria	Verrucomicrobiota	Verrucomicrobiae	Chthoniobacterales	Xiphinematobacteraceae	Candidatus_Xiphinematobacter	uncultured_bacterium	0.8430752	CK
A554	Oh43	A554xOh43	8.91293	9.0931	8.72086	9.00301	8.91293	bASV129		-0.0215503	0.0459618		BPH	Bacteria	Actinobacteriota	Acidimicrobiia	IMCC26256	IMCC26256	IMCC26256	uncultured_Ferrimicrobium	0.9804588	CK
Mo17	Oh43	Mo17xOh43	8.95167	9.16896	9.76142	9.06031	9.16896	bASV130		0.0646164	0.032455		BPH	Bacteria	Verrucomicrobiota	Verrucomicrobiae	Chthoniobacterales	Xiphinematobacteraceae	Candidatus_Xiphinematobacter	uncultured_bacterium	0.9082509	CK
Mo17	W64A	Mo17xW64A	8.95167	9.1605	9.51849	9.05609	9.1605	bASV130		0.0390793	0.0336554		BPH	Bacteria	Verrucomicrobiota	Verrucomicrobiae	Chthoniobacterales	Xiphinematobacteraceae	Candidatus_Xiphinematobacter	uncultured_bacterium	0.9082509	CK
Mo17	B73	Mo17xB73	8.95167	8.77264	9.78914	8.86216	8.95167	bASV130		0.0935544	0.0254331		BPH	Bacteria	Verrucomicrobiota	Verrucomicrobiae	Chthoniobacterales	Xiphinematobacteraceae	Candidatus_Xiphinematobacter	uncultured_bacterium	0.9082509	CK
Mo17	H84	Mo17xH84	8.95167	8.89607	9.33892	8.92387	8.95167	bASV130		0.0432607	0.0223723		BPH	Bacteria	Verrucomicrobiota	Verrucomicrobiae	Chthoniobacterales	Xiphinematobacteraceae	Candidatus_Xiphinematobacter	uncultured_bacterium	0.9082509	CK
B73	H84	B73xH84	8.77264	8.89607	9.48693	8.83436	8.89607	bASV130		0.0664172	0.0156281		BPH	Bacteria	Verrucomicrobiota	Verrucomicrobiae	Chthoniobacterales	Xiphinematobacteraceae	Candidatus_Xiphinematobacter	uncultured_bacterium	0.9082509	CK
B73	H99	B73xH99	8.77264	9.0491	9.50814	8.91087	9.0491	bASV130		0.0507272	0.0171422		BPH	Bacteria	Verrucomicrobiota	Verrucomicrobiae	Chthoniobacterales	Xiphinematobacteraceae	Candidatus_Xiphinematobacter	uncultured_bacterium	0.9082509	CK
B73	Oh43	B73xOh43	8.77264	9.16896	8.63404	8.9708	8.77264	bASV130		-0.0157995	0.0384236		BPH	Bacteria	Verrucomicrobiota	Verrucomicrobiae	Chthoniobacterales	Xiphinematobacteraceae	Candidatus_Xiphinematobacter	uncultured_bacterium	0.9082509	CK
A554	H84	A554xH84	9.31148	8.89607	9.20707	9.10377	9.31148	bASV130	0.0113462			0.0369363	MPH	Bacteria	Verrucomicrobiota	Verrucomicrobiae	Chthoniobacterales	Xiphinematobacteraceae	Candidatus_Xiphinematobacter	uncultured_bacterium	0.9082509	CK
A554	H99	A554xH99	9.31148	9.0491	9.54509	9.18029	9.31148	bASV130		0.0250888	0.0435489		BPH	Bacteria	Verrucomicrobiota	Verrucomicrobiae	Chthoniobacterales	Xiphinematobacteraceae	Candidatus_Xiphinematobacter	uncultured_bacterium	0.9082509	CK
W64A	Oh43	W64AxOh43	9.1605	9.16896	9.62732	9.16473	9.16896	bASV130		0.0499911	0.0203085		BPH	Bacteria	Verrucomicrobiota	Verrucomicrobiae	Chthoniobacterales	Xiphinematobacteraceae	Candidatus_Xiphinematobacter	uncultured_bacterium	0.9082509	CK
Mo17	H99	Mo17xH99	8.95167	9.0491	9.32403	9.00039	9.0491	bASV130		0.0303819	0.0354958		BPH	Bacteria	Verrucomicrobiota	Verrucomicrobiae	Chthoniobacterales	Xiphinematobacteraceae	Candidatus_Xiphinematobacter	uncultured_bacterium	0.9082509	CK
Mo17	W64A	Mo17xW64A	9.07872	9.0889	9.24045	9.08381	9.0889	bASV131		0.0166745	0.0499939		BPH	Bacteria	Actinobacteriota	Acidimicrobiia	Actinomarinales	uncultured	uncultured	Unidentified	0.9999403	CK
Mo17	B73	Mo17xB73	9.07872	9.16171	9.00433	9.12022	9.07872	bASV131		-0.00819385	0.0475932		BPH	Bacteria	Actinobacteriota	Acidimicrobiia	Actinomarinales	uncultured	uncultured	Unidentified	0.9999403	CK
Mo17	A554	Mo17xA554	9.1425	9.19252	8.9467	9.16751	9.1425	bASV132		-0.0214164	0.0301965		BPH	Bacteria	Proteobacteria	Gammaproteobacteria	Xanthomonadales	Xanthomonadaceae	Lysobacter	Unidentified	0.8898913	CK
B73	H84	B73xH84	9.09624	8.78175	9.06522	8.939	9.09624	bASV133	0.0141202			0.0437121	MPH	Bacteria	Proteobacteria	Gammaproteobacteria	Burkholderiales	Comamonadaceae	Ramlibacter	Unidentified	0.8857565	CK
A554	H84	A554xH84	9.14574	9.33076	9.07863	9.23825	9.14574	bASV135		-0.00733771	0.0434953		BPH	Bacteria	Acidobacteriota	Vicinamibacteria	Vicinamibacterales	uncultured	uncultured	Unidentified	0.9999937	CK
A554	Oh43	A554xOh43	9.14574	9.1735	9.49374	9.15962	9.1735	bASV135		0.0349093	0.0390135		BPH	Bacteria	Acidobacteriota	Vicinamibacteria	Vicinamibacterales	uncultured	uncultured	Unidentified	0.9999937	CK
W64A	H99	W64AxH99	9.147	9.10823	9.3527	9.12762	9.147	bASV135		0.0224881	0.0496396		BPH	Bacteria	Acidobacteriota	Vicinamibacteria	Vicinamibacterales	uncultured	uncultured	Unidentified	0.9999937	CK
Mo17	B73	Mo17xB73	8.61613	8.83099	9.25953	8.72356	8.83099	bASV136		0.0485269	0.0455981		BPH	Bacteria	Chloroflexi	KD4-96	KD4-96	KD4-96	KD4-96	Unidentified	1.0000000	CK
B73	Oh43	B73xOh43	8.83099	8.82992	9.04183	8.83045	8.83099	bASV136		0.0238753	0.0214227		BPH	Bacteria	Chloroflexi	KD4-96	KD4-96	KD4-96	KD4-96	Unidentified	1.0000000	CK
Mo17	Oh43	Mo17xOh43	8.97727	8.91793	8.84612	8.9476	8.91793	bASV138		-0.00805303	0.0451227		BPH	Bacteria	Actinobacteriota	Thermoleophilia	Gaiellales	uncultured	uncultured	Unidentified	0.9999336	CK
W64A	Oh43	W64AxOh43	8.95293	8.91793	8.73306	8.93543	8.91793	bASV138		-0.0207306	0.0357124		BPH	Bacteria	Actinobacteriota	Thermoleophilia	Gaiellales	uncultured	uncultured	Unidentified	0.9999336	CK
Mo17	B73	Mo17xB73	8.71108	8.82979	9.19625	8.77044	8.82979	bASV140		0.0415032	0.0221064		BPH	Bacteria	Chloroflexi	KD4-96	KD4-96	KD4-96	KD4-96	Unidentified	1.0000000	CK
W64A	H99	W64AxH99	9.07428	9.0446	8.96906	9.05944	9.0446	bASV140		-0.00835226	0.0369342		BPH	Bacteria	Chloroflexi	KD4-96	KD4-96	KD4-96	KD4-96	Unidentified	1.0000000	CK
Mo17	A554	Mo17xA554	8.71108	9.04687	8.99301	8.87898	9.04687	bASV140	0.0128425			0.0391434	MPH	Bacteria	Chloroflexi	KD4-96	KD4-96	KD4-96	KD4-96	Unidentified	1.0000000	CK
B73	H84	B73xH84	8.90746	8.53623	9.07495	8.72185	8.90746	bASV141		0.0188027	0.0357515		BPH	Bacteria	Proteobacteria	Gammaproteobacteria	Xanthomonadales	Xanthomonadaceae	Lysobacter	uncultured_Xanthomonadaceae	0.7235529	CK
B73	H99	B73xH99	8.90746	8.80197	8.64098	8.85472	8.80197	bASV141		-0.0182899	0.0336257		BPH	Bacteria	Proteobacteria	Gammaproteobacteria	Xanthomonadales	Xanthomonadaceae	Lysobacter	uncultured_Xanthomonadaceae	0.7235529	CK
Mo17	W64A	Mo17xW64A	8.98248	8.97591	8.79016	8.9792	8.97591	bASV142		-0.0206951	0.0419344		BPH	Bacteria	Proteobacteria	Gammaproteobacteria	PLTA13	PLTA13	PLTA13	Unidentified	1.0000000	CK
Mo17	B73	Mo17xB73	8.98248	8.96808	8.81951	8.97528	8.96808	bASV142		-0.0165664	0.0434885		BPH	Bacteria	Proteobacteria	Gammaproteobacteria	PLTA13	PLTA13	PLTA13	Unidentified	1.0000000	CK
B73	H84	B73xH84	8.96808	9.01028	8.62688	8.98918	8.96808	bASV142		-0.0380451	0.0289174		BPH	Bacteria	Proteobacteria	Gammaproteobacteria	PLTA13	PLTA13	PLTA13	Unidentified	1.0000000	CK
A554	H84	A554xH84	8.943	9.01028	8.81888	8.97664	8.943	bASV142		-0.0138791	0.0375516		BPH	Bacteria	Proteobacteria	Gammaproteobacteria	PLTA13	PLTA13	PLTA13	Unidentified	1.0000000	CK
Mo17	Oh43	Mo17xOh43	8.87317	8.99115	9.16718	8.93216	8.99115	bASV144		0.0195785	0.0451227		BPH	Bacteria	Acidobacteriota	Vicinamibacteria	Vicinamibacterales	uncultured	uncultured	uncultured_Acidobacteriaceae	0.7438549	CK
Mo17	W64A	Mo17xW64A	8.87317	8.93599	9.21234	8.90458	8.93599	bASV144		0.0309257	0.0408659		BPH	Bacteria	Acidobacteriota	Vicinamibacteria	Vicinamibacterales	uncultured	uncultured	uncultured_Acidobacteriaceae	0.7438549	CK
Mo17	B73	Mo17xB73	8.87317	8.90187	9.22354	8.88752	8.90187	bASV144		0.0361349	0.0416604		BPH	Bacteria	Acidobacteriota	Vicinamibacteria	Vicinamibacterales	uncultured	uncultured	uncultured_Acidobacteriaceae	0.7438549	CK
B73	H99	B73xH99	8.90187	8.96916	9.1388	8.93552	8.96916	bASV144		0.0189137	0.0201121		BPH	Bacteria	Acidobacteriota	Vicinamibacteria	Vicinamibacterales	uncultured	uncultured	uncultured_Acidobacteriaceae	0.7438549	CK
A554	H99	A554xH99	9.01219	8.96916	9.20362	8.99068	9.01219	bASV144		0.0212411	0.0411008		BPH	Bacteria	Acidobacteriota	Vicinamibacteria	Vicinamibacterales	uncultured	uncultured	uncultured_Acidobacteriaceae	0.7438549	CK
W64A	H99	W64AxH99	8.93599	8.96916	9.28105	8.95258	8.96916	bASV144		0.0347734	0.0339337		BPH	Bacteria	Acidobacteriota	Vicinamibacteria	Vicinamibacterales	uncultured	uncultured	uncultured_Acidobacteriaceae	0.7438549	CK
Mo17	H99	Mo17xH99	8.87317	8.96916	9.29356	8.92117	8.96916	bASV144		0.0361683	0.0390093		BPH	Bacteria	Acidobacteriota	Vicinamibacteria	Vicinamibacterales	uncultured	uncultured	uncultured_Acidobacteriaceae	0.7438549	CK
Mo17	B73	Mo17xB73	8.81518	8.85902	8.63328	8.8371	8.81518	bASV145		-0.0206347	0.0408184		BPH	Bacteria	Actinobacteriota	Thermoleophilia	Solirubrobacterales	67-14	67-14	Unidentified	0.9657260	CK
B73	H84	B73xH84	8.85902	9.23678	8.86659	9.0479	9.23678	bASV145	-0.0200384			0.037199	MPH	Bacteria	Actinobacteriota	Thermoleophilia	Solirubrobacterales	67-14	67-14	Unidentified	0.9657260	CK
B73	Oh43	B73xOh43	8.85902	8.69448	9.02653	8.77675	8.85902	bASV145		0.0189086	0.0384236		BPH	Bacteria	Actinobacteriota	Thermoleophilia	Solirubrobacterales	67-14	67-14	Unidentified	0.9657260	CK
A554	H84	A554xH84	8.82743	9.23678	8.72275	9.03211	8.82743	bASV145		-0.0118587	0.0422685		BPH	Bacteria	Actinobacteriota	Thermoleophilia	Solirubrobacterales	67-14	67-14	Unidentified	0.9657260	CK
A554	H99	A554xH99	8.82743	8.87857	8.64253	8.853	8.82743	bASV145		-0.0209467	0.0456566		BPH	Bacteria	Actinobacteriota	Thermoleophilia	Solirubrobacterales	67-14	67-14	Unidentified	0.9657260	CK
W64A	Oh43	W64AxOh43	8.87229	8.69448	8.56215	8.78338	8.69448	bASV145		-0.0152203	0.036569		BPH	Bacteria	Actinobacteriota	Thermoleophilia	Solirubrobacterales	67-14	67-14	Unidentified	0.9657260	CK
Mo17	Oh43	Mo17xOh43	8.90969	8.91587	9.16216	8.91278	8.91587	bASV146		0.0276245	0.0451227		BPH	Bacteria	Actinobacteriota	Actinobacteria	Pseudonocardiales	Pseudonocardiaceae	Pseudonocardia	Unidentified	0.9988566	CK
B73	Oh43	B73xOh43	9.03179	8.91587	9.26293	8.97383	9.03179	bASV146		0.0255916	0.0440541		BPH	Bacteria	Actinobacteriota	Actinobacteria	Pseudonocardiales	Pseudonocardiaceae	Pseudonocardia	Unidentified	0.9988566	CK
Mo17	W64A	Mo17xW64A	8.7699	8.89148	8.43895	8.83069	8.7699	bASV147		-0.0377369	0.0474131		BPH	Bacteria	Actinobacteriota	Actinobacteria	Corynebacteriales	Mycobacteriaceae	Mycobacterium	Unidentified	0.9999958	CK
A554	H84	A554xH84	8.75056	9.02768	8.56267	8.88912	8.75056	bASV147		-0.0214722	0.0422685		BPH	Bacteria	Actinobacteriota	Actinobacteria	Corynebacteriales	Mycobacteriaceae	Mycobacterium	Unidentified	0.9999958	CK
W64A	Oh43	W64AxOh43	8.89148	8.6731	8.49308	8.78229	8.6731	bASV147		-0.0207567	0.036569		BPH	Bacteria	Actinobacteriota	Actinobacteria	Corynebacteriales	Mycobacteriaceae	Mycobacterium	Unidentified	0.9999958	CK
A554	H99	A554xH99	8.63297	8.80114	9.02737	8.71706	8.80114	bASV148		0.0257043	0.0407569		BPH	Bacteria	Chloroflexi	Dehalococcoidia	S085	S085	S085	uncultured_bacterium	0.9999795	CK
W64A	H84	W64AxH84	8.90692	8.82044	8.76681	8.86368	8.82044	bASV148		-0.00608067	0.0466541		BPH	Bacteria	Chloroflexi	Dehalococcoidia	S085	S085	S085	uncultured_bacterium	0.9999795	CK
Mo17	B73	Mo17xB73	8.90937	8.87609	9.2007	8.89273	8.90937	bASV150		0.0326994	0.0475932		BPH	Bacteria	Actinobacteriota	Thermoleophilia	uncultured	uncultured	uncultured	uncultured_bacterium	0.9999999	CK
Mo17	H84	Mo17xH84	8.88011	8.90299	9.15547	8.89155	8.90299	bASV151		0.0283591	0.0383508		BPH	Bacteria	Actinobacteriota	Rubrobacteria	Rubrobacterales	Rubrobacteriaceae	Rubrobacter	uncultured_Rubrobacter	0.7785828	CK
B73	H84	B73xH84	8.85948	8.90299	9.02004	8.88124	8.90299	bASV151		0.0131466	0.0398624		BPH	Bacteria	Actinobacteriota	Rubrobacteria	Rubrobacterales	Rubrobacteriaceae	Rubrobacter	uncultured_Rubrobacter	0.7785828	CK
B73	H99	B73xH99	8.85948	8.92124	9.19173	8.89036	8.92124	bASV151		0.0303201	0.0226995		BPH	Bacteria	Actinobacteriota	Rubrobacteria	Rubrobacterales	Rubrobacteriaceae	Rubrobacter	uncultured_Rubrobacter	0.7785828	CK
Mo17	B73	Mo17xB73	9.03098	9.11107	8.62974	9.07103	9.03098	bASV152		-0.0444293	0.0376793		BPH	Bacteria	Actinobacteriota	Actinobacteria	Streptomycetales	Streptomycetaceae	Streptomyces	Unidentified	0.9997969	CK
Mo17	Oh43	Mo17xOh43	9.00179	9.06782	9.26963	9.03481	9.06782	bASV153		0.0222556	0.037331		BPH	Bacteria	Proteobacteria	Gammaproteobacteria	Gammaproteobacteria_Incertae_Sedis	Unknown_Family	Acidibacter	Unidentified	0.9996797	CK
Mo17	W64A	Mo17xW64A	9.00179	8.90054	9.17953	8.95117	9.00179	bASV153		0.0197442	0.0274937		BPH	Bacteria	Proteobacteria	Gammaproteobacteria	Gammaproteobacteria_Incertae_Sedis	Unknown_Family	Acidibacter	Unidentified	0.9996797	CK
A554	H99	A554xH99	8.99237	9.08401	9.23196	9.03819	9.08401	bASV153		0.0162866	0.030054		BPH	Bacteria	Proteobacteria	Gammaproteobacteria	Gammaproteobacteria_Incertae_Sedis	Unknown_Family	Acidibacter	Unidentified	0.9996797	CK
Mo17	Oh43	Mo17xOh43	8.72718	9.05251	9.46686	8.88985	9.05251	bASV155		0.0457718	0.0357881		BPH	Bacteria	Cyanobacteria	Cyanobacteriia	Cyanobacteriales	Nostocaceae	Nostoc_PCC-73102	Unidentified	0.8946585	CK
Mo17	W64A	Mo17xW64A	8.72718	8.89496	9.62557	8.81107	8.89496	bASV155		0.082137	0.0410326		BPH	Bacteria	Cyanobacteria	Cyanobacteriia	Cyanobacteriales	Nostocaceae	Nostoc_PCC-73102	Unidentified	0.8946585	CK
Mo17	B73	Mo17xB73	8.72718	8.68131	9.82589	8.70424	8.72718	bASV155		0.125896	0.0226212		BPH	Bacteria	Cyanobacteria	Cyanobacteriia	Cyanobacteriales	Nostocaceae	Nostoc_PCC-73102	Unidentified	0.8946585	CK
B73	H84	B73xH84	8.68131	9.01265	9.69995	8.84698	9.01265	bASV155		0.0762597	0.0252256		BPH	Bacteria	Cyanobacteria	Cyanobacteriia	Cyanobacteriales	Nostocaceae	Nostoc_PCC-73102	Unidentified	0.8946585	CK
B73	H99	B73xH99	8.68131	9.08769	9.40055	8.8845	9.08769	bASV155		0.034426	0.0352288		BPH	Bacteria	Cyanobacteria	Cyanobacteriia	Cyanobacteriales	Nostocaceae	Nostoc_PCC-73102	Unidentified	0.8946585	CK
A554	H99	A554xH99	8.95829	9.08769	9.52298	9.02299	9.08769	bASV155		0.0478984	0.0435489		BPH	Bacteria	Cyanobacteria	Cyanobacteriia	Cyanobacteriales	Nostocaceae	Nostoc_PCC-73102	Unidentified	0.8946585	CK
W64A	Oh43	W64AxOh43	8.89496	9.05251	9.5414	8.97374	9.05251	bASV155		0.0540052	0.0248874		BPH	Bacteria	Cyanobacteria	Cyanobacteriia	Cyanobacteriales	Nostocaceae	Nostoc_PCC-73102	Unidentified	0.8946585	CK
Mo17	A554	Mo17xA554	8.72718	8.95829	9.27627	8.84273	8.95829	bASV155		0.0354959	0.0424467		BPH	Bacteria	Cyanobacteria	Cyanobacteriia	Cyanobacteriales	Nostocaceae	Nostoc_PCC-73102	Unidentified	0.8946585	CK
Mo17	W64A	Mo17xW64A	8.79599	8.79938	9.09798	8.79768	8.79938	bASV157		0.0339343	0.047792		BPH	Bacteria	Gemmatimonadota	Gemmatimonadetes	Gemmatimonadales	Gemmatimonadaceae	uncultured	Unidentified	0.9999986	CK
B73	Oh43	B73xOh43	8.64944	8.77084	9.22791	8.71014	8.77084	bASV157		0.0521119	0.0330682		BPH	Bacteria	Gemmatimonadota	Gemmatimonadetes	Gemmatimonadales	Gemmatimonadaceae	uncultured	Unidentified	0.9999986	CK
A554	Oh43	A554xOh43	8.76469	8.77084	9.02104	8.76776	8.77084	bASV157		0.0285261	0.0358214		BPH	Bacteria	Gemmatimonadota	Gemmatimonadetes	Gemmatimonadales	Gemmatimonadaceae	uncultured	Unidentified	0.9999986	CK
W64A	H99	W64AxH99	8.79938	8.9301	9.01596	8.86474	8.9301	bASV157		0.0096139	0.0441606		BPH	Bacteria	Gemmatimonadota	Gemmatimonadetes	Gemmatimonadales	Gemmatimonadaceae	uncultured	Unidentified	0.9999986	CK
Mo17	B73	Mo17xB73	8.99797	8.95573	8.61297	8.97685	8.95573	bASV158		-0.0382727	0.0401792		BPH	Bacteria	Proteobacteria	Alphaproteobacteria	Sphingomonadales	Sphingomonadaceae	Sphingomonas	Unidentified	0.9997936	CK
A554	Oh43	A554xOh43	9.00551	9.07319	8.85865	9.03935	9.00551	bASV158		-0.0163075	0.0280114		BPH	Bacteria	Proteobacteria	Alphaproteobacteria	Sphingomonadales	Sphingomonadaceae	Sphingomonas	Unidentified	0.9997936	CK
W64A	H84	W64AxH84	8.87088	8.63814	8.84988	8.75451	8.87088	bASV158	0.0108942			0.0420587	MPH	Bacteria	Proteobacteria	Alphaproteobacteria	Sphingomonadales	Sphingomonadaceae	Sphingomonas	Unidentified	0.9997936	CK
W64A	H99	W64AxH99	8.87088	8.70896	8.99519	8.78992	8.87088	bASV158		0.0140134	0.0339337		BPH	Bacteria	Proteobacteria	Alphaproteobacteria	Sphingomonadales	Sphingomonadaceae	Sphingomonas	Unidentified	0.9997936	CK
A554	Oh43	A554xOh43	8.8571	8.70571	8.54695	8.7814	8.70571	bASV159		-0.0182369	0.0454073		BPH	Bacteria	Actinobacteriota	Actinobacteria	Propionibacteriales	Nocardioidaceae	Nocardioides	uncultured_organism	0.8684349	CK
W64A	Oh43	W64AxOh43	8.91724	8.70571	8.56549	8.81148	8.70571	bASV159		-0.0161075	0.036569		BPH	Bacteria	Actinobacteriota	Actinobacteria	Propionibacteriales	Nocardioidaceae	Nocardioides	uncultured_organism	0.8684349	CK
Mo17	A554	Mo17xA554	8.76493	8.8571	8.59121	8.81101	8.76493	bASV159		-0.019819	0.0457855		BPH	Bacteria	Actinobacteriota	Actinobacteria	Propionibacteriales	Nocardioidaceae	Nocardioides	uncultured_organism	0.8684349	CK
A554	H84	A554xH84	8.91668	9.02874	8.75928	8.97271	8.91668	bASV160		-0.0176521	0.0481693		BPH	Bacteria	Proteobacteria	Alphaproteobacteria	Rhizobiales	Rhizobiaceae	Phyllobacterium	Unidentified	0.9878905	CK
Mo17	Oh43	Mo17xOh43	8.84196	8.64527	8.36178	8.74362	8.64527	bASV161		-0.0327917	0.046855		BPH	Bacteria	Actinobacteriota	Actinobacteria	Propionibacteriales	Nocardioidaceae	Marmoricola	Unidentified	0.9716331	CK
Mo17	B73	Mo17xB73	8.84196	8.82223	8.52609	8.8321	8.82223	bASV161		-0.0335673	0.0401792		BPH	Bacteria	Actinobacteriota	Actinobacteria	Propionibacteriales	Nocardioidaceae	Marmoricola	Unidentified	0.9716331	CK
B73	H84	B73xH84	8.82223	8.87102	8.62717	8.84663	8.82223	bASV161		-0.02211	0.0257414		BPH	Bacteria	Actinobacteriota	Actinobacteria	Propionibacteriales	Nocardioidaceae	Marmoricola	Unidentified	0.9716331	CK
W64A	Oh43	W64AxOh43	8.7851	8.64527	8.42448	8.71519	8.64527	bASV161		-0.0255391	0.0290297		BPH	Bacteria	Actinobacteriota	Actinobacteria	Propionibacteriales	Nocardioidaceae	Marmoricola	Unidentified	0.9716331	CK
Mo17	Oh43	Mo17xOh43	8.52127	8.95903	9.11229	8.74015	8.95903	bASV162		0.0171065	0.0487983		BPH	Bacteria	Acidobacteriota	Vicinamibacteria	Vicinamibacterales	Vicinamibacteraceae	Vicinamibacteraceae	Unidentified	0.9999460	CK
Mo17	B73	Mo17xB73	8.52127	8.83672	9.06574	8.679	8.83672	bASV162		0.0259169	0.0390233		BPH	Bacteria	Acidobacteriota	Vicinamibacteria	Vicinamibacterales	Vicinamibacteraceae	Vicinamibacteraceae	Unidentified	0.9999460	CK
B73	H99	B73xH99	8.83672	8.80141	8.98994	8.81907	8.83672	bASV162		0.0173386	0.0325205		BPH	Bacteria	Acidobacteriota	Vicinamibacteria	Vicinamibacterales	Vicinamibacteraceae	Vicinamibacteraceae	Unidentified	0.9999460	CK
A554	H84	A554xH84	8.96575	8.92108	8.75884	8.94342	8.92108	bASV162		-0.0181869	0.0490081		BPH	Bacteria	Acidobacteriota	Vicinamibacteria	Vicinamibacterales	Vicinamibacteraceae	Vicinamibacteraceae	Unidentified	0.9999460	CK
W64A	H99	W64AxH99	8.87682	8.80141	9.05923	8.83912	8.87682	bASV162		0.0205489	0.0369342		BPH	Bacteria	Acidobacteriota	Vicinamibacteria	Vicinamibacterales	Vicinamibacteraceae	Vicinamibacteraceae	Unidentified	0.9999460	CK
Mo17	A554	Mo17xA554	8.52127	8.96575	8.92594	8.74351	8.96575	bASV162	0.0208646			0.0415443	MPH	Bacteria	Acidobacteriota	Vicinamibacteria	Vicinamibacterales	Vicinamibacteraceae	Vicinamibacteraceae	Unidentified	0.9999460	CK
Mo17	H99	Mo17xH99	8.52127	8.80141	9.12175	8.66134	8.80141	bASV162		0.0363965	0.0302977		BPH	Bacteria	Acidobacteriota	Vicinamibacteria	Vicinamibacterales	Vicinamibacteraceae	Vicinamibacteraceae	Unidentified	0.9999460	CK
Mo17	W64A	Mo17xW64A	8.62498	9.01002	8.95639	8.8175	9.01002	bASV163	0.0157514			0.0457545	MPH	Bacteria	Acidobacteriota	Vicinamibacteria	Vicinamibacterales	uncultured	uncultured	uncultured_bacterium	0.7202831	CK
Mo17	B73	Mo17xB73	8.62498	8.74164	9.1471	8.68331	8.74164	bASV163		0.046382	0.0254331		BPH	Bacteria	Acidobacteriota	Vicinamibacteria	Vicinamibacterales	uncultured	uncultured	uncultured_bacterium	0.7202831	CK
W64A	H84	W64AxH84	9.01002	8.97269	8.81458	8.99135	8.97269	bASV163		-0.0176204	0.0379249		BPH	Bacteria	Acidobacteriota	Vicinamibacteria	Vicinamibacterales	uncultured	uncultured	uncultured_bacterium	0.7202831	CK
Mo17	H99	Mo17xH99	8.62498	8.95757	9.10411	8.79127	8.95757	bASV163		0.01636	0.0375846		BPH	Bacteria	Acidobacteriota	Vicinamibacteria	Vicinamibacterales	uncultured	uncultured	uncultured_bacterium	0.7202831	CK
W64A	H84	W64AxH84	8.86815	8.89444	8.67525	8.8813	8.86815	bASV164		-0.021752	0.0379249		BPH	Bacteria	Methylomirabilota	Methylomirabilia	Rokubacteriales	Rokubacteriales	Rokubacteriales	uncultured_bacterium	0.9999002	CK
Mo17	A554	Mo17xA554	8.70697	8.77535	8.4826	8.74116	8.70697	bASV164		-0.0257695	0.0424467		BPH	Bacteria	Methylomirabilota	Methylomirabilia	Rokubacteriales	Rokubacteriales	Rokubacteriales	uncultured_bacterium	0.9999002	CK
Mo17	W64A	Mo17xW64A	8.78991	8.78542	9.14502	8.78767	8.78991	bASV165		0.0403995	0.0354675		BPH	Bacteria	Actinobacteriota	Actinobacteria	Streptomycetales	Streptomycetaceae	Streptomyces	Unidentified	0.9991281	CK
B73	H84	B73xH84	8.7076	9.28419	8.8389	8.99589	9.28419	bASV166	-0.0174512			0.0320921	MPH	Bacteria	Actinobacteriota	Thermoleophilia	Gaiellales	uncultured	uncultured	Unidentified	0.9992964	CK
B73	Oh43	B73xOh43	8.7076	8.80645	9.02072	8.75702	8.80645	bASV166		0.0243313	0.0248087		BPH	Bacteria	Actinobacteriota	Thermoleophilia	Gaiellales	uncultured	uncultured	Unidentified	0.9992964	CK
A554	H84	A554xH84	8.73819	9.28419	8.78469	9.01119	9.28419	bASV166	-0.0251355			0.0369363	MPH	Bacteria	Actinobacteriota	Thermoleophilia	Gaiellales	uncultured	uncultured	Unidentified	0.9992964	CK
Mo17	Oh43	Mo17xOh43	8.93753	8.83513	8.53516	8.88633	8.83513	bASV167		-0.0339514	0.0428318		BPH	Bacteria	Actinobacteriota	Actinobacteria	Streptomycetales	Streptomycetaceae	Streptomyces	Unidentified	0.9999485	CK
Mo17	B73	Mo17xB73	8.93753	8.95362	8.53276	8.94557	8.93753	bASV167		-0.0452884	0.0475932		BPH	Bacteria	Actinobacteriota	Actinobacteria	Streptomycetales	Streptomycetaceae	Streptomyces	Unidentified	0.9999485	CK
Mo17	B73	Mo17xB73	8.68378	8.63533	9.3153	8.65955	8.68378	bASV171		0.0727241	0.0281714		BPH	Bacteria	Acidobacteriota	Blastocatellia	Pyrinomonadales	Pyrinomonadaceae	RB41	Unidentified	0.9995053	CK
Mo17	H84	Mo17xH84	8.68378	8.94595	9.20685	8.81486	8.94595	bASV171		0.0291651	0.0279952		BPH	Bacteria	Acidobacteriota	Blastocatellia	Pyrinomonadales	Pyrinomonadaceae	RB41	Unidentified	0.9995053	CK
A554	Oh43	A554xOh43	8.84886	9.03658	9.28458	8.94272	9.03658	bASV171		0.0274443	0.0454073		BPH	Bacteria	Acidobacteriota	Blastocatellia	Pyrinomonadales	Pyrinomonadaceae	RB41	Unidentified	0.9995053	CK
W64A	Oh43	W64AxOh43	8.80745	9.03658	9.35816	8.92202	9.03658	bASV171		0.0355866	0.0462624		BPH	Bacteria	Acidobacteriota	Blastocatellia	Pyrinomonadales	Pyrinomonadaceae	RB41	Unidentified	0.9995053	CK
Mo17	H99	Mo17xH99	8.68378	9.11745	9.47779	8.90062	9.11745	bASV171		0.0395224	0.0441116		BPH	Bacteria	Acidobacteriota	Blastocatellia	Pyrinomonadales	Pyrinomonadaceae	RB41	Unidentified	0.9995053	CK
Mo17	Oh43	Mo17xOh43	8.57275	8.33313	8.11623	8.45294	8.33313	bASV172		-0.0260291	0.032455		BPH	Bacteria	Actinobacteriota	Actinobacteria	Propionibacteriales	Nocardioidaceae	Nocardioides	Unidentified	0.9911986	CK
B73	Oh43	B73xOh43	8.50762	8.33313	8.69248	8.42037	8.50762	bASV172		0.0217287	0.0449745		BPH	Bacteria	Actinobacteriota	Actinobacteria	Propionibacteriales	Nocardioidaceae	Nocardioides	Unidentified	0.9911986	CK
A554	H99	A554xH99	8.49709	8.30124	8.10811	8.39917	8.30124	bASV172		-0.0232652	0.0435489		BPH	Bacteria	Actinobacteriota	Actinobacteria	Propionibacteriales	Nocardioidaceae	Nocardioides	Unidentified	0.9911986	CK
Mo17	A554	Mo17xA554	8.57275	8.49709	8.26335	8.53492	8.49709	bASV172		-0.0275079	0.0424467		BPH	Bacteria	Actinobacteriota	Actinobacteria	Propionibacteriales	Nocardioidaceae	Nocardioides	Unidentified	0.9911986	CK
Mo17	H99	Mo17xH99	8.57275	8.30124	8.26439	8.437	8.30124	bASV172		-0.00443963	0.0302977		BPH	Bacteria	Actinobacteriota	Actinobacteria	Propionibacteriales	Nocardioidaceae	Nocardioides	Unidentified	0.9911986	CK
Mo17	W64A	Mo17xW64A	8.61113	8.61637	9.41642	8.61375	8.61637	bASV173		0.0928528	0.0336554		BPH	Bacteria	Chloroflexi	Chloroflexia	Chloroflexales	Roseiflexaceae	uncultured	uncultured_bacterium	0.9999934	CK
Mo17	B73	Mo17xB73	8.61113	8.43916	9.88612	8.52514	8.61113	bASV173		0.148063	0.0179861		BPH	Bacteria	Chloroflexi	Chloroflexia	Chloroflexales	Roseiflexaceae	uncultured	uncultured_bacterium	0.9999934	CK
W64A	H84	W64AxH84	8.8519	8.95817	8.67534	8.90504	8.8519	bASV174		-0.0199459	0.0320087		BPH	Bacteria	Proteobacteria	Gammaproteobacteria	Burkholderiales	Oxalobacteraceae	Massilia	Unidentified	0.9990184	CK
A554	H84	A554xH84	8.76887	8.86706	8.65315	8.81796	8.76887	bASV176		-0.0131964	0.0375516		BPH	Bacteria	Actinobacteriota	Thermoleophilia	Gaiellales	Gaiellaceae	Gaiella	metagenome	0.9853568	CK
A554	H84	A554xH84	8.68568	8.73719	8.58214	8.71144	8.68568	bASV177		-0.0119212	0.0422685		BPH	Bacteria	Acidobacteriota	Holophagae	Subgroup_7	Subgroup_7	Subgroup_7	uncultured_bacterium	0.8346691	CK
B73	H99	B73xH99	8.68588	8.60288	8.91803	8.64438	8.68588	bASV178		0.0267278	0.0296175		BPH	Bacteria	Acidobacteriota	Vicinamibacteria	Vicinamibacterales	uncultured	uncultured	uncultured_Acidobacteriaceae	0.7960495	CK
W64A	H99	W64AxH99	8.75096	8.60288	8.94774	8.67692	8.75096	bASV178		0.0224873	0.0369342		BPH	Bacteria	Acidobacteriota	Vicinamibacteria	Vicinamibacterales	uncultured	uncultured	uncultured_Acidobacteriaceae	0.7960495	CK
Mo17	H99	Mo17xH99	8.48968	8.60288	9.03492	8.54628	8.60288	bASV178		0.0502196	0.0218081		BPH	Bacteria	Acidobacteriota	Vicinamibacteria	Vicinamibacterales	uncultured	uncultured	uncultured_Acidobacteriaceae	0.7960495	CK
Mo17	B73	Mo17xB73	8.72023	8.73488	8.53085	8.72755	8.72023	bASV179		-0.0217176	0.0390233		BPH	Bacteria	Actinobacteriota	Actinobacteria	Corynebacteriales	Mycobacteriaceae	Mycobacterium	Unidentified	0.9999999	CK
B73	Oh43	B73xOh43	8.66264	8.61898	8.96371	8.64081	8.66264	bASV181		0.0347545	0.0343054		BPH	Bacteria	Actinobacteriota	Thermoleophilia	Solirubrobacterales	Solirubrobacteraceae	Solirubrobacter	Unidentified	0.9999091	CK
Mo17	W64A	Mo17xW64A	8.71371	8.93646	9.48742	8.82508	8.93646	bASV182		0.0616533	0.047792		BPH	Bacteria	Cyanobacteria	Cyanobacteriia	Cyanobacteriales	Nostocaceae	Nostoc_PCC-73102	Unidentified	0.9989564	CK
Mo17	B73	Mo17xB73	8.71371	8.62667	9.68173	8.67019	8.71371	bASV182		0.111092	0.0254331		BPH	Bacteria	Cyanobacteria	Cyanobacteriia	Cyanobacteriales	Nostocaceae	Nostoc_PCC-73102	Unidentified	0.9989564	CK
B73	H84	B73xH84	8.62667	8.84823	9.71879	8.73745	8.84823	bASV182		0.0983877	0.0239075		BPH	Bacteria	Cyanobacteria	Cyanobacteriia	Cyanobacteriales	Nostocaceae	Nostoc_PCC-73102	Unidentified	0.9989564	CK
A554	H99	A554xH99	8.90068	9.04519	9.48862	8.97294	9.04519	bASV182		0.0490237	0.0465067		BPH	Bacteria	Cyanobacteria	Cyanobacteriia	Cyanobacteriales	Nostocaceae	Nostoc_PCC-73102	Unidentified	0.9989564	CK
W64A	Oh43	W64AxOh43	8.93646	9.07885	9.4148	9.00765	9.07885	bASV182		0.0370029	0.0346947		BPH	Bacteria	Cyanobacteria	Cyanobacteriia	Cyanobacteriales	Nostocaceae	Nostoc_PCC-73102	Unidentified	0.9989564	CK
Mo17	A554	Mo17xA554	8.71371	8.90068	9.23888	8.8072	8.90068	bASV182		0.0379967	0.0489473		BPH	Bacteria	Cyanobacteria	Cyanobacteriia	Cyanobacteriales	Nostocaceae	Nostoc_PCC-73102	Unidentified	0.9989564	CK
Mo17	B73	Mo17xB73	8.49733	8.88039	8.87702	8.68886	8.88039	bASV183	0.0216553			0.0184381	MPH	Bacteria	Acidobacteriota	Vicinamibacteria	Vicinamibacterales	Vicinamibacteraceae	Vicinamibacteraceae	Unidentified	0.9999374	CK
Mo17	Oh43	Mo17xOh43	8.80161	8.60281	8.39875	8.70221	8.60281	bASV184		-0.0237212	0.0487983		BPH	Bacteria	Actinobacteriota	Thermoleophilia	Solirubrobacterales	67-14	67-14	uncultured_bacterium	0.9204684	CK
W64A	H99	W64AxH99	8.60562	8.04994	8.15748	8.32778	8.60562	bASV185	-0.02045			0.0367307	MPH	Bacteria	Actinobacteriota	Actinobacteria	Propionibacteriales	Nocardioidaceae	Aeromicrobium	uncultured_bacterium	0.9372836	CK
Mo17	A554	Mo17xA554	8.48576	8.44891	8.20022	8.46734	8.44891	bASV185		-0.0294341	0.0423011		BPH	Bacteria	Actinobacteriota	Actinobacteria	Propionibacteriales	Nocardioidaceae	Aeromicrobium	uncultured_bacterium	0.9372836	CK
Mo17	Oh43	Mo17xOh43	8.48238	8.75909	9.36394	8.62074	8.75909	bASV186		0.069054	0.037331		BPH	Bacteria	Verrucomicrobiota	Verrucomicrobiae	Chthoniobacterales	Xiphinematobacteraceae	Candidatus_Xiphinematobacter	uncultured_bacterium	0.8201415	CK
Mo17	W64A	Mo17xW64A	8.48238	8.70441	9.08586	8.59339	8.70441	bASV186		0.0438228	0.0410326		BPH	Bacteria	Verrucomicrobiota	Verrucomicrobiae	Chthoniobacterales	Xiphinematobacteraceae	Candidatus_Xiphinematobacter	uncultured_bacterium	0.8201415	CK
Mo17	B73	Mo17xB73	8.48238	8.53487	9.3857	8.50862	8.53487	bASV186		0.0996892	0.0226212		BPH	Bacteria	Verrucomicrobiota	Verrucomicrobiae	Chthoniobacterales	Xiphinematobacteraceae	Candidatus_Xiphinematobacter	uncultured_bacterium	0.8201415	CK
Mo17	H84	Mo17xH84	8.48238	8.59713	8.98698	8.53975	8.59713	bASV186		0.0453474	0.0312303		BPH	Bacteria	Verrucomicrobiota	Verrucomicrobiae	Chthoniobacterales	Xiphinematobacteraceae	Candidatus_Xiphinematobacter	uncultured_bacterium	0.8201415	CK
B73	H84	B73xH84	8.53487	8.59713	9.27678	8.566	8.59713	bASV186		0.0790554	0.0130484		BPH	Bacteria	Verrucomicrobiota	Verrucomicrobiae	Chthoniobacterales	Xiphinematobacteraceae	Candidatus_Xiphinematobacter	uncultured_bacterium	0.8201415	CK
B73	H99	B73xH99	8.53487	8.70063	8.99679	8.61775	8.70063	bASV186		0.0340382	0.0339493		BPH	Bacteria	Verrucomicrobiota	Verrucomicrobiae	Chthoniobacterales	Xiphinematobacteraceae	Candidatus_Xiphinematobacter	uncultured_bacterium	0.8201415	CK
B73	Oh43	B73xOh43	8.53487	8.75909	8.34383	8.64698	8.53487	bASV186		-0.0223837	0.0384887		BPH	Bacteria	Verrucomicrobiota	Verrucomicrobiae	Chthoniobacterales	Xiphinematobacteraceae	Candidatus_Xiphinematobacter	uncultured_bacterium	0.8201415	CK
A554	H99	A554xH99	8.95271	8.70063	9.24712	8.82667	8.95271	bASV186		0.0328846	0.030054		BPH	Bacteria	Verrucomicrobiota	Verrucomicrobiae	Chthoniobacterales	Xiphinematobacteraceae	Candidatus_Xiphinematobacter	uncultured_bacterium	0.8201415	CK
W64A	Oh43	W64AxOh43	8.70441	8.75909	9.30058	8.73175	8.75909	bASV186		0.0618199	0.0248874		BPH	Bacteria	Verrucomicrobiota	Verrucomicrobiae	Chthoniobacterales	Xiphinematobacteraceae	Candidatus_Xiphinematobacter	uncultured_bacterium	0.8201415	CK
Mo17	A554	Mo17xA554	8.48238	8.95271	9.20157	8.71755	8.95271	bASV186		0.0277969	0.0489473		BPH	Bacteria	Verrucomicrobiota	Verrucomicrobiae	Chthoniobacterales	Xiphinematobacteraceae	Candidatus_Xiphinematobacter	uncultured_bacterium	0.8201415	CK
B73	H84	B73xH84	8.78896	8.97612	9.11383	8.88254	8.97612	bASV187		0.0153419	0.0379381		BPH	Bacteria	Bacteroidota	Bacteroidia	Chitinophagales	Chitinophagaceae	uncultured	Unidentified	0.9987538	CK
B73	H99	B73xH99	8.78896	8.91233	9.06706	8.85064	8.91233	bASV187		0.017361	0.0339493		BPH	Bacteria	Bacteroidota	Bacteroidia	Chitinophagales	Chitinophagaceae	uncultured	Unidentified	0.9987538	CK
A554	H99	A554xH99	8.90407	8.91233	9.38472	8.9082	8.91233	bASV187		0.0530048	0.030054		BPH	Bacteria	Bacteroidota	Bacteroidia	Chitinophagales	Chitinophagaceae	uncultured	Unidentified	0.9987538	CK
W64A	Oh43	W64AxOh43	8.80119	9.08618	9.36333	8.94368	9.08618	bASV187		0.0305032	0.0426407		BPH	Bacteria	Bacteroidota	Bacteroidia	Chitinophagales	Chitinophagaceae	uncultured	Unidentified	0.9987538	CK
Mo17	H99	Mo17xH99	8.91023	8.91233	9.10616	8.91128	8.91233	bASV187		0.0217485	0.0441116		BPH	Bacteria	Bacteroidota	Bacteroidia	Chitinophagales	Chitinophagaceae	uncultured	Unidentified	0.9987538	CK
Mo17	W64A	Mo17xW64A	8.59117	8.62495	8.44457	8.60806	8.59117	bASV188		-0.0170647	0.0465821		BPH	Bacteria	Proteobacteria	Alphaproteobacteria	Sphingomonadales	Sphingomonadaceae	Sphingomonas	Unidentified	0.9942877	CK
A554	H84	A554xH84	8.58785	8.52455	8.35681	8.5562	8.52455	bASV188		-0.0196779	0.0456304		BPH	Bacteria	Proteobacteria	Alphaproteobacteria	Sphingomonadales	Sphingomonadaceae	Sphingomonas	Unidentified	0.9942877	CK
Mo17	H84	Mo17xH84	8.87841	8.70988	8.58735	8.79415	8.70988	bASV189		-0.014068	0.0216177		BPH	Bacteria	Proteobacteria	Gammaproteobacteria	Xanthomonadales	Xanthomonadaceae	Arenimonas	Unidentified	0.9999997	CK
Mo17	H99	Mo17xH99	8.87841	8.78928	8.68091	8.83385	8.78928	bASV189		-0.0123307	0.0334973		BPH	Bacteria	Proteobacteria	Gammaproteobacteria	Xanthomonadales	Xanthomonadaceae	Arenimonas	Unidentified	0.9999997	CK
Mo17	Oh43	Mo17xOh43	8.60124	8.87108	9.2793	8.73616	8.87108	bASV190		0.0460165	0.0297278		BPH	Bacteria	Acidobacteriota	Blastocatellia	Blastocatellales	Blastocatellaceae	uncultured	Unidentified	0.9149112	CK
Mo17	W64A	Mo17xW64A	8.60124	8.87025	9.1239	8.73575	8.87025	bASV190		0.0285951	0.0499939		BPH	Bacteria	Acidobacteriota	Blastocatellia	Blastocatellales	Blastocatellaceae	uncultured	Unidentified	0.9149112	CK
Mo17	B73	Mo17xB73	8.60124	8.6917	9.35969	8.64647	8.6917	bASV190		0.0768545	0.0365518		BPH	Bacteria	Acidobacteriota	Blastocatellia	Blastocatellales	Blastocatellaceae	uncultured	Unidentified	0.9149112	CK
B73	Oh43	B73xOh43	8.6917	8.87108	8.58067	8.78139	8.6917	bASV190		-0.0127744	0.0391455		BPH	Bacteria	Acidobacteriota	Blastocatellia	Blastocatellales	Blastocatellaceae	uncultured	Unidentified	0.9149112	CK
A554	H84	A554xH84	8.80875	8.82492	8.75478	8.81683	8.80875	bASV190		-0.00612681	0.0375516		BPH	Bacteria	Acidobacteriota	Blastocatellia	Blastocatellales	Blastocatellaceae	uncultured	Unidentified	0.9149112	CK
A554	H99	A554xH99	8.80875	8.89983	9.25014	8.85429	8.89983	bASV190		0.0393618	0.030054		BPH	Bacteria	Acidobacteriota	Blastocatellia	Blastocatellales	Blastocatellaceae	uncultured	Unidentified	0.9149112	CK
W64A	H84	W64AxH84	8.87025	8.82492	8.75158	8.84759	8.82492	bASV190		-0.00831107	0.0466541		BPH	Bacteria	Acidobacteriota	Blastocatellia	Blastocatellales	Blastocatellaceae	uncultured	Unidentified	0.9149112	CK
W64A	Oh43	W64AxOh43	8.87025	8.87108	9.12961	8.87067	8.87108	bASV190		0.0291432	0.0199024		BPH	Bacteria	Acidobacteriota	Blastocatellia	Blastocatellales	Blastocatellaceae	uncultured	Unidentified	0.9149112	CK
Mo17	A554	Mo17xA554	8.60124	8.80875	9.0276	8.705	8.80875	bASV190		0.024845	0.0424467		BPH	Bacteria	Acidobacteriota	Blastocatellia	Blastocatellales	Blastocatellaceae	uncultured	Unidentified	0.9149112	CK
Mo17	B73	Mo17xB73	8.68695	8.70433	8.41442	8.69564	8.68695	bASV192		-0.0313721	0.0226212		BPH	Bacteria	Proteobacteria	Alphaproteobacteria	Rhizobiales	Rhizobiaceae	Unidentified	Unidentified	0.9998808	CK
Mo17	Oh43	Mo17xOh43	8.38192	8.3582	7.95768	8.37006	8.3582	bASV194		-0.047919	0.0350315		BPH	Bacteria	Gemmatimonadota	AKAU4049	AKAU4049	AKAU4049	AKAU4049	uncultured_bacterium	0.9075290	CK
Mo17	B73	Mo17xB73	8.38192	8.36977	8.13916	8.37584	8.36977	bASV194		-0.0275527	0.0445243		BPH	Bacteria	Gemmatimonadota	AKAU4049	AKAU4049	AKAU4049	AKAU4049	uncultured_bacterium	0.9075290	CK
B73	H84	B73xH84	8.36977	8.27173	8.11424	8.32075	8.27173	bASV194		-0.0190395	0.0265135		BPH	Bacteria	Gemmatimonadota	AKAU4049	AKAU4049	AKAU4049	AKAU4049	uncultured_bacterium	0.9075290	CK
A554	H99	A554xH99	8.27985	8.09006	7.88001	8.18496	8.09006	bASV194		-0.0259633	0.0435489		BPH	Bacteria	Gemmatimonadota	AKAU4049	AKAU4049	AKAU4049	AKAU4049	uncultured_bacterium	0.9075290	CK
Mo17	Oh43	Mo17xOh43	8.43851	8.60132	8.8212	8.51991	8.60132	bASV195		0.025563	0.0487983		BPH	Bacteria	Acidobacteriota	Vicinamibacteria	Vicinamibacterales	Vicinamibacteraceae	Vicinamibacteraceae	Unidentified	0.9998686	CK
Mo17	A554	Mo17xA554	8.43851	8.48207	8.7892	8.46029	8.48207	bASV195		0.0362102	0.0450278		BPH	Bacteria	Acidobacteriota	Vicinamibacteria	Vicinamibacterales	Vicinamibacteraceae	Vicinamibacteraceae	Unidentified	0.9998686	CK
Mo17	W64A	Mo17xW64A	8.36518	8.71568	8.91586	8.54043	8.71568	bASV196		0.0229684	0.0419344		BPH	Bacteria	Acidobacteriota	Vicinamibacteria	Vicinamibacterales	Vicinamibacteraceae	uncultured	Unidentified	0.9905886	CK
B73	Oh43	B73xOh43	8.72788	8.67575	8.52238	8.70182	8.67575	bASV196		-0.0176779	0.0275162		BPH	Bacteria	Acidobacteriota	Vicinamibacteria	Vicinamibacterales	Vicinamibacteraceae	uncultured	Unidentified	0.9905886	CK
W64A	H84	W64AxH84	8.71568	8.66863	8.61727	8.69215	8.66863	bASV196		-0.00592413	0.0466541		BPH	Bacteria	Acidobacteriota	Vicinamibacteria	Vicinamibacterales	Vicinamibacteraceae	uncultured	Unidentified	0.9905886	CK
Mo17	Oh43	Mo17xOh43	8.79669	8.8564	9.24629	8.82655	8.8564	bASV197		0.0440235	0.032455		BPH	Bacteria	Bacteroidota	Bacteroidia	Chitinophagales	Chitinophagaceae	Flavitalea	Unidentified	0.9999521	CK
Mo17	B73	Mo17xB73	8.79669	8.74041	9.19196	8.76855	8.79669	bASV197		0.0449332	0.0432349		BPH	Bacteria	Bacteroidota	Bacteroidia	Chitinophagales	Chitinophagaceae	Flavitalea	Unidentified	0.9999521	CK
B73	H84	B73xH84	8.74041	8.54027	9.21568	8.64034	8.74041	bASV197		0.0543763	0.0194618		BPH	Bacteria	Bacteroidota	Bacteroidia	Chitinophagales	Chitinophagaceae	Flavitalea	Unidentified	0.9999521	CK
B73	H99	B73xH99	8.74041	8.80464	8.9986	8.77253	8.80464	bASV197		0.0220293	0.0251682		BPH	Bacteria	Bacteroidota	Bacteroidia	Chitinophagales	Chitinophagaceae	Flavitalea	Unidentified	0.9999521	CK
A554	Oh43	A554xOh43	8.90213	8.8564	9.0115	8.87926	8.90213	bASV197		0.0122854	0.0390135		BPH	Bacteria	Bacteroidota	Bacteroidia	Chitinophagales	Chitinophagaceae	Flavitalea	Unidentified	0.9999521	CK
Mo17	B73	Mo17xB73	8.92657	8.97034	9.0575	8.94846	8.97034	bASV199		0.00971645	0.0478303		BPH	Bacteria	Bacteroidota	Bacteroidia	Sphingobacteriales	Sphingobacteriaceae	Pedobacter	Unidentified	0.7641715	CK
B73	Oh43	B73xOh43	8.97034	8.97422	8.60769	8.97228	8.97034	bASV199		-0.0404279	0.0343711		BPH	Bacteria	Bacteroidota	Bacteroidia	Sphingobacteriales	Sphingobacteriaceae	Pedobacter	Unidentified	0.7641715	CK
A554	Oh43	A554xOh43	8.99318	8.97422	9.11788	8.9837	8.99318	bASV199		0.013867	0.0390135		BPH	Bacteria	Bacteroidota	Bacteroidia	Sphingobacteriales	Sphingobacteriaceae	Pedobacter	Unidentified	0.7641715	CK
Mo17	Oh43	Mo17xOh43	8.71291	8.38994	8.22452	8.55142	8.38994	bASV200		-0.0197165	0.0388304		BPH	Bacteria	Actinobacteriota	Actinobacteria	Propionibacteriales	Nocardioidaceae	Marmoricola	Unidentified	0.8292980	CK
Mo17	W64A	Mo17xW64A	8.71291	8.51122	8.2779	8.61207	8.51122	bASV200		-0.0274135	0.0419344		BPH	Bacteria	Actinobacteriota	Actinobacteria	Propionibacteriales	Nocardioidaceae	Marmoricola	Unidentified	0.8292980	CK
Mo17	B73	Mo17xB73	8.71291	8.52566	8.21928	8.61929	8.52566	bASV200		-0.0359372	0.0475932		BPH	Bacteria	Actinobacteriota	Actinobacteria	Propionibacteriales	Nocardioidaceae	Marmoricola	Unidentified	0.8292980	CK
B73	Oh43	B73xOh43	8.52566	8.38994	8.7823	8.4578	8.52566	bASV200		0.0301015	0.0275162		BPH	Bacteria	Actinobacteriota	Actinobacteria	Propionibacteriales	Nocardioidaceae	Marmoricola	Unidentified	0.8292980	CK
Mo17	A554	Mo17xA554	8.71291	8.54	8.42493	8.62646	8.54	bASV200		-0.0134738	0.0457855		BPH	Bacteria	Actinobacteriota	Actinobacteria	Propionibacteriales	Nocardioidaceae	Marmoricola	Unidentified	0.8292980	CK
Mo17	H99	Mo17xH99	8.71291	8.42499	8.22264	8.56895	8.42499	bASV200		-0.0240173	0.0429727		BPH	Bacteria	Actinobacteriota	Actinobacteria	Propionibacteriales	Nocardioidaceae	Marmoricola	Unidentified	0.8292980	CK
Mo17	W64A	Mo17xW64A	8.77381	8.70234	8.60078	8.73807	8.70234	bASV201		-0.011671	0.0388047		BPH	Bacteria	Actinobacteriota	Actinobacteria	Micrococcales	Intrasporangiaceae	Terrabacter	Unidentified	0.9963314	CK
Mo17	B73	Mo17xB73	8.74249	8.59786	8.47003	8.67018	8.59786	bASV203		-0.0148682	0.0365518		BPH	Bacteria	Actinobacteriota	Thermoleophilia	Gaiellales	Gaiellaceae	Gaiella	Unidentified	0.8157339	CK
Mo17	H84	Mo17xH84	8.60234	8.56873	8.47874	8.58554	8.56873	bASV204		-0.0105024	0.0497682		BPH	Bacteria	Actinobacteriota	Thermoleophilia	Solirubrobacterales	67-14	67-14	uncultured_Rubrobacteria	0.9613015	CK
B73	H84	B73xH84	8.61151	8.56873	8.52213	8.59012	8.56873	bASV204		-0.00543918	0.0296038		BPH	Bacteria	Actinobacteriota	Thermoleophilia	Solirubrobacterales	67-14	67-14	uncultured_Rubrobacteria	0.9613015	CK
B73	Oh43	B73xOh43	8.61151	8.39978	8.82737	8.50564	8.61151	bASV204		0.0250674	0.0248389		BPH	Bacteria	Actinobacteriota	Thermoleophilia	Solirubrobacterales	67-14	67-14	uncultured_Rubrobacteria	0.9613015	CK
A554	H84	A554xH84	8.56806	8.56873	8.71841	8.5684	8.56873	bASV204		0.0174673	0.0481693		BPH	Bacteria	Actinobacteriota	Thermoleophilia	Solirubrobacterales	67-14	67-14	uncultured_Rubrobacteria	0.9613015	CK
A554	Oh43	A554xOh43	8.56806	8.39978	8.63569	8.48392	8.56806	bASV204		0.00789391	0.0454073		BPH	Bacteria	Actinobacteriota	Thermoleophilia	Solirubrobacterales	67-14	67-14	uncultured_Rubrobacteria	0.9613015	CK
W64A	H84	W64AxH84	8.67226	8.56873	8.59847	8.6205	8.67226	bASV204	-0.00255565			0.0330822	MPH	Bacteria	Actinobacteriota	Thermoleophilia	Solirubrobacterales	67-14	67-14	uncultured_Rubrobacteria	0.9613015	CK
W64A	H99	W64AxH99	8.67226	8.67726	8.63073	8.67476	8.67226	bASV204		-0.00478827	0.0496396		BPH	Bacteria	Actinobacteriota	Thermoleophilia	Solirubrobacterales	67-14	67-14	uncultured_Rubrobacteria	0.9613015	CK
W64A	Oh43	W64AxOh43	8.67226	8.39978	8.40553	8.53602	8.67226	bASV204	-0.0152871			0.0265752	MPH	Bacteria	Actinobacteriota	Thermoleophilia	Solirubrobacterales	67-14	67-14	uncultured_Rubrobacteria	0.9613015	CK
Mo17	Oh43	Mo17xOh43	8.16394	8.55494	8.55037	8.35944	8.55494	bASV205	0.0228404			0.0385093	MPH	Bacteria	Acidobacteriota	Vicinamibacteria	Vicinamibacterales	Vicinamibacteraceae	Vicinamibacteraceae	Unidentified	0.9999810	CK
A554	H99	A554xH99	8.59821	8.58891	8.29177	8.59356	8.58891	bASV205		-0.0345952	0.0435489		BPH	Bacteria	Acidobacteriota	Vicinamibacteria	Vicinamibacterales	Vicinamibacteraceae	Vicinamibacteraceae	Unidentified	0.9999810	CK
A554	Oh43	A554xOh43	8.59821	8.55494	8.361	8.57657	8.55494	bASV205		-0.0226692	0.0454073		BPH	Bacteria	Acidobacteriota	Vicinamibacteria	Vicinamibacterales	Vicinamibacteraceae	Vicinamibacteraceae	Unidentified	0.9999810	CK
Mo17	W64A	Mo17xW64A	8.58742	8.63529	8.83347	8.61135	8.63529	bASV206		0.0229507	0.0354675		BPH	Bacteria	Acidobacteriota	Vicinamibacteria	Vicinamibacterales	uncultured	uncultured	Unidentified	0.9991585	CK
Mo17	B73	Mo17xB73	8.58742	8.54584	8.80289	8.56663	8.58742	bASV206		0.0250911	0.0390233		BPH	Bacteria	Acidobacteriota	Vicinamibacteria	Vicinamibacterales	uncultured	uncultured	Unidentified	0.9991585	CK
B73	H99	B73xH99	8.54584	8.52584	8.87023	8.53584	8.54584	bASV206		0.0379586	0.04353		BPH	Bacteria	Acidobacteriota	Vicinamibacteria	Vicinamibacterales	uncultured	uncultured	Unidentified	0.9991585	CK
A554	H84	A554xH84	8.70717	8.91271	8.9043	8.80994	8.91271	bASV206	0.0107103			0.037686	MPH	Bacteria	Acidobacteriota	Vicinamibacteria	Vicinamibacterales	uncultured	uncultured	Unidentified	0.9991585	CK
W64A	H99	W64AxH99	8.63529	8.52584	8.91652	8.58056	8.63529	bASV206		0.0325685	0.0372057		BPH	Bacteria	Acidobacteriota	Vicinamibacteria	Vicinamibacterales	uncultured	uncultured	Unidentified	0.9991585	CK
Mo17	H99	Mo17xH99	8.58742	8.52584	9.07943	8.55663	8.58742	bASV206		0.057294	0.0246864		BPH	Bacteria	Acidobacteriota	Vicinamibacteria	Vicinamibacterales	uncultured	uncultured	Unidentified	0.9991585	CK
B73	Oh43	B73xOh43	8.68001	8.4967	8.86886	8.58835	8.68001	bASV207		0.0217572	0.0269251		BPH	Bacteria	Actinobacteriota	Thermoleophilia	Solirubrobacterales	67-14	67-14	Unidentified	0.9635735	CK
Mo17	Oh43	Mo17xOh43	8.47374	8.79727	9.31668	8.63551	8.79727	bASV208		0.0590425	0.0360855		BPH	Bacteria	Verrucomicrobiota	Verrucomicrobiae	Chthoniobacterales	Xiphinematobacteraceae	Candidatus_Xiphinematobacter	Unidentified	0.9999899	CK
Mo17	W64A	Mo17xW64A	8.47374	8.58942	8.99737	8.53158	8.58942	bASV208		0.0474944	0.0354675		BPH	Bacteria	Verrucomicrobiota	Verrucomicrobiae	Chthoniobacterales	Xiphinematobacteraceae	Candidatus_Xiphinematobacter	Unidentified	0.9999899	CK
Mo17	B73	Mo17xB73	8.47374	8.38732	9.1101	8.43053	8.47374	bASV208		0.0750981	0.0249616		BPH	Bacteria	Verrucomicrobiota	Verrucomicrobiae	Chthoniobacterales	Xiphinematobacteraceae	Candidatus_Xiphinematobacter	Unidentified	0.9999899	CK
Mo17	H84	Mo17xH84	8.47374	8.3767	8.79277	8.42522	8.47374	bASV208		0.0376495	0.0416902		BPH	Bacteria	Verrucomicrobiota	Verrucomicrobiae	Chthoniobacterales	Xiphinematobacteraceae	Candidatus_Xiphinematobacter	Unidentified	0.9999899	CK
B73	H84	B73xH84	8.38732	8.3767	9.06449	8.38201	8.38732	bASV208		0.0807374	0.0124675		BPH	Bacteria	Verrucomicrobiota	Verrucomicrobiae	Chthoniobacterales	Xiphinematobacteraceae	Candidatus_Xiphinematobacter	Unidentified	0.9999899	CK
B73	H99	B73xH99	8.38732	8.49275	8.94356	8.44004	8.49275	bASV208		0.0530814	0.019905		BPH	Bacteria	Verrucomicrobiota	Verrucomicrobiae	Chthoniobacterales	Xiphinematobacteraceae	Candidatus_Xiphinematobacter	Unidentified	0.9999899	CK
A554	H99	A554xH99	8.85654	8.49275	9.16948	8.67465	8.85654	bASV208		0.0353336	0.0384502		BPH	Bacteria	Verrucomicrobiota	Verrucomicrobiae	Chthoniobacterales	Xiphinematobacteraceae	Candidatus_Xiphinematobacter	Unidentified	0.9999899	CK
W64A	Oh43	W64AxOh43	8.58942	8.79727	9.13834	8.69335	8.79727	bASV208		0.0387695	0.0111329		BPH	Bacteria	Verrucomicrobiota	Verrucomicrobiae	Chthoniobacterales	Xiphinematobacteraceae	Candidatus_Xiphinematobacter	Unidentified	0.9999899	CK
Mo17	H99	Mo17xH99	8.47374	8.49275	8.91977	8.48325	8.49275	bASV208		0.0502804	0.0402735		BPH	Bacteria	Verrucomicrobiota	Verrucomicrobiae	Chthoniobacterales	Xiphinematobacteraceae	Candidatus_Xiphinematobacter	Unidentified	0.9999899	CK
Mo17	B73	Mo17xB73	8.50924	8.66985	9.03344	8.58955	8.66985	bASV209		0.0419362	0.0309259		BPH	Bacteria	Verrucomicrobiota	Verrucomicrobiae	Pedosphaerales	Pedosphaeraceae	Unidentified	Unidentified	1.0000000	CK
B73	H84	B73xH84	8.66985	8.63537	8.89959	8.65261	8.66985	bASV209		0.0264983	0.0438277		BPH	Bacteria	Verrucomicrobiota	Verrucomicrobiae	Pedosphaerales	Pedosphaeraceae	Unidentified	Unidentified	1.0000000	CK
W64A	H84	W64AxH84	8.71288	8.63537	8.52562	8.67413	8.63537	bASV209		-0.01271	0.0466541		BPH	Bacteria	Verrucomicrobiota	Verrucomicrobiae	Pedosphaerales	Pedosphaeraceae	Unidentified	Unidentified	1.0000000	CK
Mo17	Oh43	Mo17xOh43	8.71528	8.55538	8.84794	8.63533	8.71528	bASV210		0.0152213	0.032455		BPH	Bacteria	Actinobacteriota	Thermoleophilia	Solirubrobacterales	Solirubrobacteraceae	Solirubrobacter	Unidentified	0.9999881	CK
A554	H84	A554xH84	8.56486	8.945	8.90225	8.75493	8.945	bASV210	0.0168266			0.037686	MPH	Bacteria	Actinobacteriota	Thermoleophilia	Solirubrobacterales	Solirubrobacteraceae	Solirubrobacter	Unidentified	0.9999881	CK
A554	Oh43	A554xOh43	8.56486	8.55538	8.82031	8.56012	8.56486	bASV210		0.0298256	0.0390135		BPH	Bacteria	Actinobacteriota	Thermoleophilia	Solirubrobacterales	Solirubrobacteraceae	Solirubrobacter	Unidentified	0.9999881	CK
Mo17	H84	Mo17xH84	8.64939	8.68743	8.38286	8.66841	8.64939	bASV211		-0.0308159	0.0338486		BPH	Bacteria	Actinobacteriota	Actinobacteria	Frankiales	Geodermatophilaceae	Blastococcus	Unidentified	0.7377095	CK
W64A	H84	W64AxH84	8.54346	8.68743	8.86137	8.61544	8.68743	bASV211		0.0200218	0.0320087		BPH	Bacteria	Actinobacteriota	Actinobacteria	Frankiales	Geodermatophilaceae	Blastococcus	Unidentified	0.7377095	CK
B73	Oh43	B73xOh43	8.54131	8.58476	8.84177	8.56304	8.58476	bASV212		0.0299373	0.0309753		BPH	Bacteria	Actinobacteriota	Actinobacteria	Streptosporangiales	Streptosporangiaceae	Nonomuraea	Unidentified	0.9983838	CK
A554	H84	A554xH84	8.56053	8.4816	8.689	8.52107	8.56053	bASV212		0.0150062	0.0456304		BPH	Bacteria	Actinobacteriota	Actinobacteria	Streptosporangiales	Streptosporangiaceae	Nonomuraea	Unidentified	0.9983838	CK
Mo17	B73	Mo17xB73	8.7122	8.69981	8.37989	8.70601	8.69981	bASV213		-0.036774	0.0462438		BPH	Bacteria	Myxococcota	bacteriap25	bacteriap25	bacteriap25	bacteriap25	uncultured_soil	0.9094642	CK
W64A	H84	W64AxH84	8.66245	8.75292	8.47417	8.70768	8.66245	bASV214		-0.0217346	0.0210574		BPH	Bacteria	Acidobacteriota	Vicinamibacteria	Vicinamibacterales	uncultured	uncultured	Unidentified	0.9996042	CK
Mo17	W64A	Mo17xW64A	8.54674	8.54053	8.29265	8.54363	8.54053	bASV216		-0.0290244	0.0225217		BPH	Bacteria	Proteobacteria	Alphaproteobacteria	Rhizobiales	Methyloligellaceae	uncultured	Unidentified	0.9989962	CK
Mo17	B73	Mo17xB73	8.54674	8.48926	8.14923	8.518	8.48926	bASV216		-0.0400531	0.0179861		BPH	Bacteria	Proteobacteria	Alphaproteobacteria	Rhizobiales	Methyloligellaceae	uncultured	Unidentified	0.9989962	CK
Mo17	H84	Mo17xH84	8.54674	8.57927	8.27866	8.563	8.54674	bASV216		-0.0313653	0.0373683		BPH	Bacteria	Proteobacteria	Alphaproteobacteria	Rhizobiales	Methyloligellaceae	uncultured	Unidentified	0.9989962	CK
B73	Oh43	B73xOh43	8.48926	8.49181	8.31565	8.49053	8.48926	bASV216		-0.0204496	0.0275162		BPH	Bacteria	Proteobacteria	Alphaproteobacteria	Rhizobiales	Methyloligellaceae	uncultured	Unidentified	0.9989962	CK
A554	H84	A554xH84	8.47775	8.57927	8.22058	8.52851	8.47775	bASV216		-0.0303353	0.00982958		BPH	Bacteria	Proteobacteria	Alphaproteobacteria	Rhizobiales	Methyloligellaceae	uncultured	Unidentified	0.9989962	CK
A554	H99	A554xH99	8.47775	8.34217	8.17885	8.40996	8.34217	bASV216		-0.019578	0.030054		BPH	Bacteria	Proteobacteria	Alphaproteobacteria	Rhizobiales	Methyloligellaceae	uncultured	Unidentified	0.9989962	CK
A554	Oh43	A554xOh43	8.47775	8.49181	8.32971	8.48478	8.47775	bASV216		-0.017462	0.022358		BPH	Bacteria	Proteobacteria	Alphaproteobacteria	Rhizobiales	Methyloligellaceae	uncultured	Unidentified	0.9989962	CK
W64A	Oh43	W64AxOh43	8.54053	8.49181	8.33113	8.51617	8.49181	bASV216		-0.0189217	0.0437183		BPH	Bacteria	Proteobacteria	Alphaproteobacteria	Rhizobiales	Methyloligellaceae	uncultured	Unidentified	0.9989962	CK
B73	Oh43	B73xOh43	8.65574	8.61338	8.99672	8.63456	8.65574	bASV217		0.0393928	0.0214227		BPH	Bacteria	Actinobacteriota	Actinobacteria	Propionibacteriales	Nocardioidaceae	Nocardioides	Unidentified	0.9974970	CK
W64A	Oh43	W64AxOh43	8.67338	8.61338	8.47465	8.64338	8.61338	bASV217		-0.0161064	0.042579		BPH	Bacteria	Actinobacteriota	Actinobacteria	Propionibacteriales	Nocardioidaceae	Nocardioides	Unidentified	0.9974970	CK
Mo17	H99	Mo17xH99	8.73292	8.82919	8.57034	8.78105	8.73292	bASV217		-0.0186173	0.0361417		BPH	Bacteria	Actinobacteriota	Actinobacteria	Propionibacteriales	Nocardioidaceae	Nocardioides	Unidentified	0.9974970	CK
Mo17	B73	Mo17xB73	8.58203	8.58052	8.05086	8.58128	8.58052	bASV218		-0.0617283	0.0460415		BPH	Bacteria	Proteobacteria	Alphaproteobacteria	Rhizobiales	Methyloligellaceae	uncultured	Unidentified	0.8954854	CK
A554	H84	A554xH84	8.65699	8.44374	8.3723	8.55037	8.44374	bASV218		-0.0084605	0.0481693		BPH	Bacteria	Proteobacteria	Alphaproteobacteria	Rhizobiales	Methyloligellaceae	uncultured	Unidentified	0.8954854	CK
Mo17	B73	Mo17xB73	8.57772	8.54388	9.16609	8.5608	8.57772	bASV219		0.0685926	0.0418605		BPH	Bacteria	Chloroflexi	Chloroflexia	Thermomicrobiales	JG30-KF-CM45	JG30-KF-CM45	uncultured_Chloroflexi	0.7433490	CK
B73	Oh43	B73xOh43	8.54388	8.79619	9.09445	8.67003	8.79619	bASV219		0.0339083	0.041466		BPH	Bacteria	Chloroflexi	Chloroflexia	Thermomicrobiales	JG30-KF-CM45	JG30-KF-CM45	uncultured_Chloroflexi	0.7433490	CK
B73	H84	B73xH84	8.61386	8.59516	8.93182	8.60451	8.61386	bASV220		0.0369115	0.0474801		BPH	Bacteria	Actinobacteriota	Actinobacteria	Propionibacteriales	Nocardioidaceae	Kribbella	uncultured_bacterium	0.7035085	CK
B73	Oh43	B73xOh43	8.61386	8.63814	8.84528	8.626	8.63814	bASV220		0.0239802	0.0275162		BPH	Bacteria	Actinobacteriota	Actinobacteria	Propionibacteriales	Nocardioidaceae	Kribbella	uncultured_bacterium	0.7035085	CK
A554	H99	A554xH99	8.55451	8.5726	8.83846	8.56355	8.5726	bASV220		0.0310137	0.0363014		BPH	Bacteria	Actinobacteriota	Actinobacteria	Propionibacteriales	Nocardioidaceae	Kribbella	uncultured_bacterium	0.7035085	CK
Mo17	B73	Mo17xB73	8.57591	8.49773	9.16294	8.53682	8.57591	bASV222		0.0684509	0.0455981		BPH	Bacteria	Acidobacteriota	Blastocatellia	Blastocatellales	Blastocatellaceae	uncultured	uncultured_Acidobacteria	0.7686095	CK
B73	H99	B73xH99	8.49773	8.55231	8.78184	8.52502	8.55231	bASV222		0.0268383	0.0178443		BPH	Bacteria	Acidobacteriota	Blastocatellia	Blastocatellales	Blastocatellaceae	uncultured	uncultured_Acidobacteria	0.7686095	CK
A554	H84	A554xH84	8.77702	8.48686	8.5571	8.63194	8.77702	bASV222	-0.00867066			0.037686	MPH	Bacteria	Acidobacteriota	Blastocatellia	Blastocatellales	Blastocatellaceae	uncultured	uncultured_Acidobacteria	0.7686095	CK
A554	H99	A554xH99	8.77702	8.55231	8.97892	8.66466	8.77702	bASV222		0.0230034	0.0435489		BPH	Bacteria	Acidobacteriota	Blastocatellia	Blastocatellales	Blastocatellaceae	uncultured	uncultured_Acidobacteria	0.7686095	CK
Mo17	H99	Mo17xH99	8.57591	8.55231	8.81854	8.56411	8.57591	bASV222		0.0282918	0.0218081		BPH	Bacteria	Acidobacteriota	Blastocatellia	Blastocatellales	Blastocatellaceae	uncultured	uncultured_Acidobacteria	0.7686095	CK
Mo17	B73	Mo17xB73	8.45443	8.59234	9.04183	8.52339	8.59234	bASV223		0.0523133	0.0390233		BPH	Bacteria	Acidobacteriota	Vicinamibacteria	Vicinamibacterales	uncultured	uncultured	Unidentified	0.9989698	CK
A554	H84	A554xH84	8.62834	8.71942	8.50598	8.67388	8.62834	bASV223		-0.014181	0.0462427		BPH	Bacteria	Acidobacteriota	Vicinamibacteria	Vicinamibacterales	uncultured	uncultured	Unidentified	0.9989698	CK
A554	H99	A554xH99	8.62834	8.63083	8.80791	8.62958	8.63083	bASV223		0.0205172	0.032329		BPH	Bacteria	Acidobacteriota	Vicinamibacteria	Vicinamibacterales	uncultured	uncultured	Unidentified	0.9989698	CK
Mo17	H99	Mo17xH99	8.45443	8.63083	8.71771	8.54263	8.63083	bASV223		0.0100669	0.0370362		BPH	Bacteria	Acidobacteriota	Vicinamibacteria	Vicinamibacterales	uncultured	uncultured	Unidentified	0.9989698	CK
B73	H99	B73xH99	8.55273	8.47831	8.11091	8.51552	8.47831	bASV226		-0.0433334	0.0171422		BPH	Bacteria	Proteobacteria	Alphaproteobacteria	Rhizobiales	Xanthobacteraceae	uncultured	Unidentified	0.9797218	CK
Mo17	Oh43	Mo17xOh43	8.55097	9.05022	8.98047	8.80059	9.05022	bASV228	0.0204397			0.0283682	MPH	Bacteria	Gemmatimonadota	Gemmatimonadetes	Gemmatimonadales	Gemmatimonadaceae	Gemmatimonas	Unidentified	1.0000000	CK
Mo17	W64A	Mo17xW64A	8.55097	8.50719	8.94738	8.52908	8.55097	bASV228		0.0463584	0.0225217		BPH	Bacteria	Gemmatimonadota	Gemmatimonadetes	Gemmatimonadales	Gemmatimonadaceae	Gemmatimonas	Unidentified	1.0000000	CK
Mo17	B73	Mo17xB73	8.55097	8.52625	8.89214	8.53861	8.55097	bASV228		0.0398987	0.0221064		BPH	Bacteria	Gemmatimonadota	Gemmatimonadetes	Gemmatimonadales	Gemmatimonadaceae	Gemmatimonas	Unidentified	1.0000000	CK
Mo17	A554	Mo17xA554	8.55097	8.48644	9.06362	8.5187	8.55097	bASV228		0.0599524	0.0457855		BPH	Bacteria	Gemmatimonadota	Gemmatimonadetes	Gemmatimonadales	Gemmatimonadaceae	Gemmatimonas	Unidentified	1.0000000	CK
W64A	Oh43	W64AxOh43	8.6359	8.54045	8.2588	8.58818	8.54045	bASV229		-0.0329779	0.0327066		BPH	Bacteria	Proteobacteria	Alphaproteobacteria	Tistrellales	Geminicoccaceae	uncultured	Unidentified	0.9999960	CK
B73	H84	B73xH84	8.50723	8.64371	8.46321	8.57547	8.50723	bASV231		-0.00517469	0.0265135		BPH	Bacteria	Acidobacteriota	Vicinamibacteria	Vicinamibacterales	uncultured	uncultured	uncultured_Acidobacteria	0.8184142	CK
B73	H99	B73xH99	8.50723	8.46906	8.72497	8.48814	8.50723	bASV231		0.0255954	0.0226995		BPH	Bacteria	Acidobacteriota	Vicinamibacteria	Vicinamibacterales	uncultured	uncultured	uncultured_Acidobacteria	0.8184142	CK
B73	Oh43	B73xOh43	8.50723	8.60282	8.40013	8.55502	8.50723	bASV231		-0.0125889	0.0275162		BPH	Bacteria	Acidobacteriota	Vicinamibacteria	Vicinamibacterales	uncultured	uncultured	uncultured_Acidobacteria	0.8184142	CK
A554	H84	A554xH84	8.69399	8.64371	8.48254	8.66885	8.64371	bASV231		-0.0186466	0.0422685		BPH	Bacteria	Acidobacteriota	Vicinamibacteria	Vicinamibacterales	uncultured	uncultured	uncultured_Acidobacteria	0.8184142	CK
W64A	H84	W64AxH84	8.64057	8.64371	8.53199	8.64214	8.64057	bASV231		-0.012567	0.0320087		BPH	Bacteria	Acidobacteriota	Vicinamibacteria	Vicinamibacterales	uncultured	uncultured	uncultured_Acidobacteria	0.8184142	CK
Mo17	H99	Mo17xH99	8.4785	8.46906	8.78272	8.47378	8.4785	bASV231		0.035881	0.0246864		BPH	Bacteria	Acidobacteriota	Vicinamibacteria	Vicinamibacterales	uncultured	uncultured	uncultured_Acidobacteria	0.8184142	CK
B73	Oh43	B73xOh43	8.48508	8.55997	8.35562	8.52252	8.48508	bASV232		-0.0152578	0.0449745		BPH	Bacteria	RCP2-54	RCP2-54	RCP2-54	RCP2-54	RCP2-54	Unidentified	0.9879395	CK
B73	H99	B73xH99	8.41109	8.70429	8.23525	8.55769	8.41109	bASV233		-0.0209054	0.0296175		BPH	Bacteria	Actinobacteriota	Thermoleophilia	Gaiellales	uncultured	uncultured	Unidentified	0.9994193	CK
B73	H99	B73xH99	8.5796	8.55097	8.33615	8.56529	8.55097	bASV235		-0.0251226	0.0311065		BPH	Bacteria	Proteobacteria	Alphaproteobacteria	Rhizobiales	Xanthobacteraceae	uncultured	uncultured_Bradyrhizobiaceae	0.8641102	CK
B73	H84	B73xH84	8.61902	8.63721	8.79226	8.62811	8.63721	bASV236		0.0179513	0.036488		BPH	Bacteria	Myxococcota	bacteriap25	bacteriap25	bacteriap25	bacteriap25	metagenome	1.0000000	CK
A554	H99	A554xH99	8.56976	8.74076	8.85214	8.65526	8.74076	bASV236		0.0127425	0.030054		BPH	Bacteria	Myxococcota	bacteriap25	bacteriap25	bacteriap25	bacteriap25	metagenome	1.0000000	CK
Mo17	A554	Mo17xA554	8.60533	8.56976	8.93102	8.58755	8.60533	bASV236		0.0378471	0.0314016		BPH	Bacteria	Myxococcota	bacteriap25	bacteriap25	bacteriap25	bacteriap25	metagenome	1.0000000	CK
Mo17	H84	Mo17xH84	8.62491	8.59018	8.40025	8.60754	8.59018	bASV237		-0.02211	0.0393903		BPH	Bacteria	Actinobacteriota	Acidimicrobiia	Microtrichales	Iamiaceae	Iamia	Unidentified	0.9979899	CK
W64A	H84	W64AxH84	8.50775	8.59018	8.68515	8.54897	8.59018	bASV237		0.0110563	0.0320087		BPH	Bacteria	Actinobacteriota	Acidimicrobiia	Microtrichales	Iamiaceae	Iamia	Unidentified	0.9979899	CK
B73	Oh43	B73xOh43	8.45099	8.52565	8.80103	8.48832	8.52565	bASV238		0.0323002	0.0449745		BPH	Bacteria	Actinobacteriota	Actinobacteria	Micromonosporales	Micromonosporaceae	Dactylosporangium	Unidentified	0.9991591	CK
W64A	H84	W64AxH84	8.49457	8.62018	8.84238	8.55737	8.62018	bASV238		0.0257771	0.0488781		BPH	Bacteria	Actinobacteriota	Actinobacteria	Micromonosporales	Micromonosporaceae	Dactylosporangium	Unidentified	0.9991591	CK
Mo17	H99	Mo17xH99	8.6498	8.6548	8.38012	8.6523	8.6498	bASV238		-0.0311768	0.038624		BPH	Bacteria	Actinobacteriota	Actinobacteria	Micromonosporales	Micromonosporaceae	Dactylosporangium	Unidentified	0.9991591	CK
Mo17	Oh43	Mo17xOh43	8.66385	8.68695	8.42328	8.6754	8.66385	bASV239		-0.0277671	0.0487983		BPH	Bacteria	Actinobacteriota	Actinobacteria	Propionibacteriales	Nocardioidaceae	Nocardioides	Marmoricola_sp.	0.7867461	CK
Mo17	W64A	Mo17xW64A	8.66385	8.63431	8.32454	8.64908	8.63431	bASV239		-0.0358761	0.0410326		BPH	Bacteria	Actinobacteriota	Actinobacteria	Propionibacteriales	Nocardioidaceae	Nocardioides	Marmoricola_sp.	0.7867461	CK
Mo17	B73	Mo17xB73	8.66385	8.57105	8.39672	8.61745	8.57105	bASV239		-0.0203398	0.0455981		BPH	Bacteria	Actinobacteriota	Actinobacteria	Propionibacteriales	Nocardioidaceae	Nocardioides	Marmoricola_sp.	0.7867461	CK
W64A	H99	W64AxH99	8.63431	8.64144	8.50106	8.63787	8.63431	bASV239		-0.0154324	0.0369342		BPH	Bacteria	Actinobacteriota	Actinobacteria	Propionibacteriales	Nocardioidaceae	Nocardioides	Marmoricola_sp.	0.7867461	CK
Mo17	W64A	Mo17xW64A	8.33007	8.25049	7.53729	8.29028	8.25049	bASV240		-0.0864442	0.0268712		BPH	Bacteria	Proteobacteria	Alphaproteobacteria	Rhizobiales	Devosiaceae	Devosia	Unidentified	0.8441042	CK
Mo17	B73	Mo17xB73	8.33007	8.36022	7.53722	8.34514	8.33007	bASV240		-0.0951787	0.0221064		BPH	Bacteria	Proteobacteria	Alphaproteobacteria	Rhizobiales	Devosiaceae	Devosia	Unidentified	0.8441042	CK
B73	H84	B73xH84	8.36022	7.53746	7.53839	7.94884	8.36022	bASV240	-0.0516359			0.0320921	MPH	Bacteria	Proteobacteria	Alphaproteobacteria	Rhizobiales	Devosiaceae	Devosia	Unidentified	0.8441042	CK
B73	Oh43	B73xOh43	8.36022	7.53694	7.5372	7.94858	8.36022	bASV240	-0.0517556			0.0217501	MPH	Bacteria	Proteobacteria	Alphaproteobacteria	Rhizobiales	Devosiaceae	Devosia	Unidentified	0.8441042	CK
W64A	H84	W64AxH84	8.25049	7.53746	7.59314	7.89398	8.25049	bASV240	-0.0381097			0.0330822	MPH	Bacteria	Proteobacteria	Alphaproteobacteria	Rhizobiales	Devosiaceae	Devosia	Unidentified	0.8441042	CK
W64A	Oh43	W64AxOh43	8.25049	7.53694	7.53786	7.89372	8.25049	bASV240	-0.0450804			0.0265752	MPH	Bacteria	Proteobacteria	Alphaproteobacteria	Rhizobiales	Devosiaceae	Devosia	Unidentified	0.8441042	CK
Mo17	A554	Mo17xA554	8.33007	8.3186	7.5393	8.32433	8.3186	bASV240		-0.0936816	0.0424467		BPH	Bacteria	Proteobacteria	Alphaproteobacteria	Rhizobiales	Devosiaceae	Devosia	Unidentified	0.8441042	CK
W64A	H99	W64AxH99	8.47421	8.40887	8.60822	8.44154	8.47421	bASV241		0.015814	0.0339337		BPH	Bacteria	Actinobacteriota	Acidimicrobiia	Actinomarinales	uncultured	uncultured	Unidentified	0.9998735	CK
Mo17	Oh43	Mo17xOh43	8.48828	8.36628	8.13248	8.42728	8.36628	bASV242		-0.0279459	0.032455		BPH	Bacteria	Proteobacteria	Alphaproteobacteria	Rhizobiales	Hyphomicrobiaceae	Pedomicrobium	Unidentified	0.8811466	CK
Mo17	B73	Mo17xB73	8.48828	8.34105	8.08513	8.41467	8.34105	bASV242		-0.0306818	0.0432349		BPH	Bacteria	Proteobacteria	Alphaproteobacteria	Rhizobiales	Hyphomicrobiaceae	Pedomicrobium	Unidentified	0.8811466	CK
B73	Oh43	B73xOh43	8.34105	8.36628	8.62697	8.35367	8.36628	bASV242		0.0311598	0.0440541		BPH	Bacteria	Proteobacteria	Alphaproteobacteria	Rhizobiales	Hyphomicrobiaceae	Pedomicrobium	Unidentified	0.8811466	CK
Mo17	B73	Mo17xB73	8.5935	8.56667	8.76256	8.58008	8.5935	bASV243		0.0196737	0.0496567		BPH	Bacteria	Proteobacteria	Alphaproteobacteria	Azospirillales	Azospirillaceae	Skermanella	Unidentified	0.9994997	CK
W64A	Oh43	W64AxOh43	8.40123	8.34433	8.536	8.37278	8.40123	bASV243		0.0160425	0.0484656		BPH	Bacteria	Proteobacteria	Alphaproteobacteria	Azospirillales	Azospirillaceae	Skermanella	Unidentified	0.9994997	CK
Mo17	W64A	Mo17xW64A	8.42329	8.40069	8.57528	8.41199	8.42329	bASV245		0.0180438	0.0490889		BPH	Bacteria	Proteobacteria	Gammaproteobacteria	Burkholderiales	Nitrosomonadaceae	MND1	Unidentified	1.0000000	CK
Mo17	A554	Mo17xA554	8.48203	8.59847	8.34194	8.54025	8.48203	bASV246		-0.0165151	0.0434923		BPH	Bacteria	Actinobacteriota	Thermoleophilia	Solirubrobacterales	Solirubrobacteraceae	Conexibacter	Unidentified	0.9761062	CK
Mo17	W64A	Mo17xW64A	8.12397	8.39753	8.70028	8.26075	8.39753	bASV247		0.0360527	0.0471493		BPH	Bacteria	Acidobacteriota	Blastocatellia	Pyrinomonadales	Pyrinomonadaceae	RB41	Unidentified	0.9998884	CK
B73	H84	B73xH84	8.17734	8.16142	8.25337	8.16938	8.17734	bASV247		0.00929747	0.016773		BPH	Bacteria	Acidobacteriota	Blastocatellia	Pyrinomonadales	Pyrinomonadaceae	RB41	Unidentified	0.9998884	CK
Mo17	B73	Mo17xB73	8.59858	8.49195	8.24871	8.54527	8.49195	bASV248		-0.0286437	0.033644		BPH	Bacteria	Actinobacteriota	Thermoleophilia	Gaiellales	uncultured	uncultured	Unidentified	0.9997130	CK
Mo17	A554	Mo17xA554	8.59858	8.68094	8.37118	8.63976	8.59858	bASV248		-0.0264461	0.0424467		BPH	Bacteria	Actinobacteriota	Thermoleophilia	Gaiellales	uncultured	uncultured	Unidentified	0.9997130	CK
Mo17	H84	Mo17xH84	8.55047	8.64472	8.36572	8.59759	8.55047	bASV249		-0.0216074	0.0432637		BPH	Bacteria	Gemmatimonadota	Gemmatimonadetes	Gemmatimonadales	Gemmatimonadaceae	uncultured	uncultured_Gemmatimonadales	0.7501869	CK
B73	H84	B73xH84	8.39842	8.64472	8.30254	8.52157	8.39842	bASV249		-0.0114161	0.036488		BPH	Bacteria	Gemmatimonadota	Gemmatimonadetes	Gemmatimonadales	Gemmatimonadaceae	uncultured	uncultured_Gemmatimonadales	0.7501869	CK
B73	Oh43	B73xOh43	8.39842	8.42878	8.80921	8.4136	8.42878	bASV249		0.0451349	0.0152264		BPH	Bacteria	Gemmatimonadota	Gemmatimonadetes	Gemmatimonadales	Gemmatimonadaceae	uncultured	uncultured_Gemmatimonadales	0.7501869	CK
Mo17	H84	Mo17xH84	8.53467	8.31714	8.92232	8.42591	8.53467	bASV250		0.0454203	0.0497682		BPH	Bacteria	Firmicutes	Bacilli	Paenibacillales	Paenibacillaceae	Paenibacillus	Unidentified	0.9999931	CK
B73	Oh43	B73xOh43	8.72813	8.9119	8.49094	8.82001	8.72813	bASV250		-0.0271756	0.0384236		BPH	Bacteria	Firmicutes	Bacilli	Paenibacillales	Paenibacillaceae	Paenibacillus	Unidentified	0.9999931	CK
B73	H99	B73xH99	8.49773	8.41303	8.2827	8.45538	8.41303	bASV251		-0.0154916	0.0454098		BPH	Bacteria	Acidobacteriota	Vicinamibacteria	Vicinamibacterales	uncultured	uncultured	Unidentified	0.9998901	CK
B73	Oh43	B73xOh43	8.49773	8.30536	8.22441	8.40154	8.30536	bASV251		-0.00974597	0.0449745		BPH	Bacteria	Acidobacteriota	Vicinamibacteria	Vicinamibacterales	uncultured	uncultured	Unidentified	0.9998901	CK
W64A	H84	W64AxH84	8.46424	8.51356	8.30944	8.4889	8.46424	bASV251		-0.0182893	0.0466541		BPH	Bacteria	Acidobacteriota	Vicinamibacteria	Vicinamibacterales	uncultured	uncultured	Unidentified	0.9998901	CK
Mo17	H99	Mo17xH99	8.38731	8.41303	8.53047	8.40017	8.41303	bASV251		0.0139594	0.0218081		BPH	Bacteria	Acidobacteriota	Vicinamibacteria	Vicinamibacterales	uncultured	uncultured	Unidentified	0.9998901	CK
Mo17	Oh43	Mo17xOh43	8.24802	8.57269	8.7401	8.41035	8.57269	bASV252		0.0195282	0.0487983		BPH	Bacteria	Chloroflexi	KD4-96	KD4-96	KD4-96	KD4-96	Unidentified	1.0000000	CK
Mo17	B73	Mo17xB73	8.24802	8.261	8.72058	8.25451	8.261	bASV252		0.0556324	0.0445243		BPH	Bacteria	Chloroflexi	KD4-96	KD4-96	KD4-96	KD4-96	Unidentified	1.0000000	CK
B73	H84	B73xH84	8.261	8.75901	8.75562	8.51001	8.75901	bASV252	0.0288616			0.037199	MPH	Bacteria	Chloroflexi	KD4-96	KD4-96	KD4-96	KD4-96	Unidentified	1.0000000	CK
W64A	Oh43	W64AxOh43	8.47898	8.57269	8.70722	8.52583	8.57269	bASV252		0.015692	0.0248874		BPH	Bacteria	Chloroflexi	KD4-96	KD4-96	KD4-96	KD4-96	Unidentified	1.0000000	CK
Mo17	A554	Mo17xA554	8.24802	8.55472	8.74546	8.40137	8.55472	bASV252		0.0222963	0.0235037		BPH	Bacteria	Chloroflexi	KD4-96	KD4-96	KD4-96	KD4-96	Unidentified	1.0000000	CK
B73	H84	B73xH84	8.421	8.1218	8.59332	8.2714	8.421	bASV254		0.0204642	0.0398624		BPH	Bacteria	Proteobacteria	Gammaproteobacteria	Burkholderiales	Comamonadaceae	Unidentified	Unidentified	1.0000000	CK
Mo17	Oh43	Mo17xOh43	8.55039	8.48405	8.38827	8.51722	8.48405	bASV255		-0.0112905	0.032455		BPH	Bacteria	Acidobacteriota	Subgroup_25	Subgroup_25	Subgroup_25	Subgroup_25	uncultured_bacterium	0.9721436	CK
W64A	H84	W64AxH84	8.51125	8.3156	8.31881	8.41342	8.51125	bASV255	-0.0112454			0.0330822	MPH	Bacteria	Acidobacteriota	Subgroup_25	Subgroup_25	Subgroup_25	Subgroup_25	uncultured_bacterium	0.9721436	CK
W64A	Oh43	W64AxOh43	8.51125	8.48405	8.32091	8.49765	8.48405	bASV255		-0.0192295	0.0451685		BPH	Bacteria	Acidobacteriota	Subgroup_25	Subgroup_25	Subgroup_25	Subgroup_25	uncultured_bacterium	0.9721436	CK
B73	H84	B73xH84	8.5741	8.23001	8.54413	8.40206	8.5741	bASV256	0.0169097			0.0437121	MPH	Bacteria	Proteobacteria	Gammaproteobacteria	Burkholderiales	Nitrosomonadaceae	Nitrosospira	Unidentified	0.9957068	CK
A554	Oh43	A554xOh43	8.55532	8.54137	8.80024	8.54834	8.55532	bASV256		0.0286284	0.0456743		BPH	Bacteria	Proteobacteria	Gammaproteobacteria	Burkholderiales	Nitrosomonadaceae	Nitrosospira	Unidentified	0.9957068	CK
W64A	Oh43	W64AxOh43	8.51798	8.54137	8.68831	8.52968	8.54137	bASV256		0.0172035	0.0484922		BPH	Bacteria	Proteobacteria	Gammaproteobacteria	Burkholderiales	Nitrosomonadaceae	Nitrosospira	Unidentified	0.9957068	CK
Mo17	W64A	Mo17xW64A	8.62785	8.63287	8.30103	8.63036	8.62785	bASV257		-0.0378802	0.0419344		BPH	Bacteria	Actinobacteriota	Actinobacteria	Propionibacteriales	Nocardioidaceae	Nocardioides	Unidentified	0.9862792	CK
Mo17	B73	Mo17xB73	8.62785	8.47392	8.16914	8.55088	8.47392	bASV257		-0.035966	0.0478303		BPH	Bacteria	Actinobacteriota	Actinobacteria	Propionibacteriales	Nocardioidaceae	Nocardioides	Unidentified	0.9862792	CK
Mo17	H84	Mo17xH84	8.62785	8.60004	8.39032	8.61394	8.60004	bASV257		-0.0243852	0.0495009		BPH	Bacteria	Actinobacteriota	Actinobacteria	Propionibacteriales	Nocardioidaceae	Nocardioides	Unidentified	0.9862792	CK
B73	H99	B73xH99	8.47392	8.59403	8.43466	8.53397	8.47392	bASV257		-0.00463286	0.0387671		BPH	Bacteria	Actinobacteriota	Actinobacteria	Propionibacteriales	Nocardioidaceae	Nocardioides	Unidentified	0.9862792	CK
B73	Oh43	B73xOh43	8.47392	8.37284	8.5678	8.42338	8.47392	bASV257		0.011079	0.0448862		BPH	Bacteria	Actinobacteriota	Actinobacteria	Propionibacteriales	Nocardioidaceae	Nocardioides	Unidentified	0.9862792	CK
Mo17	H99	Mo17xH99	8.62785	8.59403	8.23048	8.61094	8.59403	bASV257		-0.0423027	0.0218081		BPH	Bacteria	Actinobacteriota	Actinobacteria	Propionibacteriales	Nocardioidaceae	Nocardioides	Unidentified	0.9862792	CK
Mo17	B73	Mo17xB73	8.17229	8.37975	8.52625	8.27602	8.37975	bASV258		0.017483	0.0432349		BPH	Bacteria	Chloroflexi	KD4-96	KD4-96	KD4-96	KD4-96	Unidentified	1.0000000	CK
Mo17	Oh43	Mo17xOh43	8.51937	8.53268	8.28725	8.52602	8.51937	bASV259		-0.0272461	0.032455		BPH	Bacteria	Proteobacteria	Alphaproteobacteria	Rhodobacterales	Rhodobacteraceae	Amaricoccus	Unidentified	0.9738675	CK
A554	H99	A554xH99	8.36314	8.40399	8.51403	8.38357	8.40399	bASV259		0.0130937	0.0459001		BPH	Bacteria	Proteobacteria	Alphaproteobacteria	Rhodobacterales	Rhodobacteraceae	Amaricoccus	Unidentified	0.9738675	CK
B73	H99	B73xH99	8.4208	8.33863	8.56491	8.37972	8.4208	bASV261		0.0171128	0.0431759		BPH	Bacteria	Entotheonellaeota	Entotheonellia	Entotheonellales	Entotheonellaceae	Entotheonellaceae	Unidentified	1.0000000	CK
W64A	H84	W64AxH84	8.53712	8.49949	8.33939	8.5183	8.49949	bASV262		-0.0188354	0.0364821		BPH	Bacteria	Acidobacteriota	Subgroup_5	Subgroup_5	Subgroup_5	Subgroup_5	uncultured_Acidobacteria	0.8834895	CK
A554	H84	A554xH84	8.70987	8.52825	8.2275	8.61906	8.52825	bASV263		-0.0352647	0.0490081		BPH	Bacteria	Acidobacteriota	Vicinamibacteria	Vicinamibacterales	Vicinamibacteraceae	Unidentified	Unidentified	0.9935498	CK
A554	H99	A554xH99	8.70987	8.54433	8.34773	8.6271	8.54433	bASV263		-0.0230095	0.0435489		BPH	Bacteria	Acidobacteriota	Vicinamibacteria	Vicinamibacterales	Vicinamibacteraceae	Unidentified	Unidentified	0.9935498	CK
Mo17	H84	Mo17xH84	8.45612	8.3032	8.44455	8.37966	8.45612	bASV265	0.00774346			0.040737	MPH	Bacteria	Proteobacteria	Gammaproteobacteria	KI89A_clade	KI89A_clade	KI89A_clade	Unidentified	0.9930966	CK
B73	H84	B73xH84	8.52644	8.3032	8.49536	8.41482	8.52644	bASV265	0.0095715			0.0213062	MPH	Bacteria	Proteobacteria	Gammaproteobacteria	KI89A_clade	KI89A_clade	KI89A_clade	Unidentified	0.9930966	CK
B73	Oh43	B73xOh43	8.52644	8.46667	8.31546	8.49655	8.46667	bASV265		-0.0178596	0.0269251		BPH	Bacteria	Proteobacteria	Gammaproteobacteria	KI89A_clade	KI89A_clade	KI89A_clade	Unidentified	0.9930966	CK
B73	H99	B73xH99	8.40303	8.43289	8.28405	8.41796	8.40303	bASV266		-0.0141593	0.0226995		BPH	Bacteria	Proteobacteria	Alphaproteobacteria	Rhizobiales	Xanthobacteraceae	uncultured	Unidentified	0.9959241	CK
A554	H99	A554xH99	8.43437	8.43289	8.19708	8.43363	8.43289	bASV266		-0.0279627	0.0405397		BPH	Bacteria	Proteobacteria	Alphaproteobacteria	Rhizobiales	Xanthobacteraceae	uncultured	Unidentified	0.9959241	CK
A554	Oh43	A554xOh43	8.43437	8.23854	8.13161	8.33645	8.23854	bASV266		-0.0129788	0.0390135		BPH	Bacteria	Proteobacteria	Alphaproteobacteria	Rhizobiales	Xanthobacteraceae	uncultured	Unidentified	0.9959241	CK
W64A	H99	W64AxH99	8.49732	8.43289	8.27021	8.4651	8.43289	bASV266		-0.0192908	0.0369342		BPH	Bacteria	Proteobacteria	Alphaproteobacteria	Rhizobiales	Xanthobacteraceae	uncultured	Unidentified	0.9959241	CK
Mo17	A554	Mo17xA554	8.45222	8.43437	8.25929	8.44329	8.43437	bASV266		-0.0207575	0.0450278		BPH	Bacteria	Proteobacteria	Alphaproteobacteria	Rhizobiales	Xanthobacteraceae	uncultured	Unidentified	0.9959241	CK
Mo17	B73	Mo17xB73	8.19535	8.31358	8.63612	8.25446	8.31358	bASV268		0.038797	0.0455981		BPH	Bacteria	Acidobacteriota	Vicinamibacteria	Vicinamibacterales	uncultured	uncultured	uncultured_bacterium	0.7882707	CK
B73	H99	B73xH99	8.31358	8.26608	8.45044	8.28983	8.31358	bASV268		0.0164621	0.0171422		BPH	Bacteria	Acidobacteriota	Vicinamibacteria	Vicinamibacterales	uncultured	uncultured	uncultured_bacterium	0.7882707	CK
W64A	H99	W64AxH99	8.40925	8.26608	8.58439	8.33766	8.40925	bASV268		0.0208277	0.0459704		BPH	Bacteria	Acidobacteriota	Vicinamibacteria	Vicinamibacterales	uncultured	uncultured	uncultured_bacterium	0.7882707	CK
Mo17	H99	Mo17xH99	8.19535	8.26608	8.52685	8.23071	8.26608	bASV268		0.0315474	0.0390093		BPH	Bacteria	Acidobacteriota	Vicinamibacteria	Vicinamibacterales	uncultured	uncultured	uncultured_bacterium	0.7882707	CK
B73	H99	B73xH99	8.47268	8.55401	8.79793	8.51335	8.55401	bASV269		0.0285147	0.0210385		BPH	Bacteria	Chloroflexi	Anaerolineae	Anaerolineales	Anaerolineaceae	Anaerolinea	Unidentified	0.9640354	CK
Mo17	W64A	Mo17xW64A	8.20789	8.45213	8.92975	8.33001	8.45213	bASV270		0.0565095	0.0157979		BPH	Bacteria	Acidobacteriota	Vicinamibacteria	Vicinamibacterales	uncultured	uncultured	uncultured_Acidobacteria	0.8305887	CK
A554	H99	A554xH99	8.49451	8.20422	8.85401	8.34937	8.49451	bASV270		0.0423208	0.0435489		BPH	Bacteria	Acidobacteriota	Vicinamibacteria	Vicinamibacterales	uncultured	uncultured	uncultured_Acidobacteria	0.8305887	CK
Mo17	H99	Mo17xH99	8.20789	8.20422	8.96416	8.20606	8.20789	bASV270		0.0921387	0.0302977		BPH	Bacteria	Acidobacteriota	Vicinamibacteria	Vicinamibacterales	uncultured	uncultured	uncultured_Acidobacteria	0.8305887	CK
Mo17	W64A	Mo17xW64A	8.31622	8.45354	9.12442	8.38488	8.45354	bASV272		0.0793611	0.0419344		BPH	Bacteria	Cyanobacteria	Cyanobacteriia	Cyanobacteriales	Nostocaceae	Nostoc_PCC-7524	Trichormus_variabilis	0.7022021	CK
Mo17	B73	Mo17xB73	8.31622	8.28871	9.33455	8.30247	8.31622	bASV272		0.12245	0.0366567		BPH	Bacteria	Cyanobacteria	Cyanobacteriia	Cyanobacteriales	Nostocaceae	Nostoc_PCC-7524	Trichormus_variabilis	0.7022021	CK
B73	H84	B73xH84	8.28871	8.50741	9.28976	8.39806	8.50741	bASV272		0.0919603	0.0252256		BPH	Bacteria	Cyanobacteria	Cyanobacteriia	Cyanobacteriales	Nostocaceae	Nostoc_PCC-7524	Trichormus_variabilis	0.7022021	CK
A554	H99	A554xH99	8.54587	8.69728	9.18689	8.62157	8.69728	bASV272		0.0562949	0.0396317		BPH	Bacteria	Cyanobacteria	Cyanobacteriia	Cyanobacteriales	Nostocaceae	Nostoc_PCC-7524	Trichormus_variabilis	0.7022021	CK
W64A	Oh43	W64AxOh43	8.45354	8.85345	9.1659	8.6535	8.85345	bASV272		0.0352912	0.0346947		BPH	Bacteria	Cyanobacteria	Cyanobacteriia	Cyanobacteriales	Nostocaceae	Nostoc_PCC-7524	Trichormus_variabilis	0.7022021	CK
Mo17	A554	Mo17xA554	8.31622	8.54587	8.82469	8.43104	8.54587	bASV272		0.0326264	0.0424467		BPH	Bacteria	Cyanobacteria	Cyanobacteriia	Cyanobacteriales	Nostocaceae	Nostoc_PCC-7524	Trichormus_variabilis	0.7022021	CK
Mo17	H99	Mo17xH99	8.30872	8.35735	8.49384	8.33304	8.35735	bASV273		0.0163312	0.0402735		BPH	Bacteria	Myxococcota	Myxococcia	Myxococcales	Myxococcaceae	Unidentified	Unidentified	0.9999996	CK
Mo17	W64A	Mo17xW64A	8.46178	8.35387	8.4889	8.40782	8.46178	bASV274		0.00320454	0.0471493		BPH	Bacteria	Acidobacteriota	Acidobacteriae	Solibacterales	Solibacteraceae	Candidatus_Solibacter	metagenome	0.9239344	CK
B73	H99	B73xH99	8.41337	8.30764	8.50915	8.36051	8.41337	bASV274		0.0113839	0.0171422		BPH	Bacteria	Acidobacteriota	Acidobacteriae	Solibacterales	Solibacteraceae	Candidatus_Solibacter	metagenome	0.9239344	CK
Mo17	W64A	Mo17xW64A	8.4498	8.34459	8.65699	8.3972	8.4498	bASV275		0.0245199	0.0477954		BPH	Bacteria	Proteobacteria	Gammaproteobacteria	Burkholderiales	Nitrosomonadaceae	Nitrosospira	Unidentified	0.9961471	CK
W64A	H99	W64AxH99	8.34459	8.30266	8.51058	8.32362	8.34459	bASV275		0.0198916	0.0339337		BPH	Bacteria	Proteobacteria	Gammaproteobacteria	Burkholderiales	Nitrosomonadaceae	Nitrosospira	Unidentified	0.9961471	CK
Mo17	H99	Mo17xH99	8.4498	8.30266	8.59972	8.37623	8.4498	bASV275		0.0177429	0.0397521		BPH	Bacteria	Proteobacteria	Gammaproteobacteria	Burkholderiales	Nitrosomonadaceae	Nitrosospira	Unidentified	0.9961471	CK
W64A	H99	W64AxH99	8.45021	8.54266	8.81196	8.49644	8.54266	bASV276		0.0315231	0.0339337		BPH	Bacteria	Proteobacteria	Gammaproteobacteria	Burkholderiales	Oxalobacteraceae	Unidentified	Unidentified	0.9997797	CK
W64A	Oh43	W64AxOh43	8.45021	8.59168	8.86324	8.52095	8.59168	bASV276		0.0316066	0.0248874		BPH	Bacteria	Proteobacteria	Gammaproteobacteria	Burkholderiales	Oxalobacteraceae	Unidentified	Unidentified	0.9997797	CK
Mo17	Oh43	Mo17xOh43	8.13638	8.20195	8.41947	8.16916	8.20195	bASV277		0.0265212	0.0487983		BPH	Bacteria	Acidobacteriota	Vicinamibacteria	Vicinamibacterales	Vicinamibacteraceae	Vicinamibacteraceae	Unidentified	0.9999992	CK
B73	H99	B73xH99	8.3373	8.4342	8.14857	8.38575	8.3373	bASV277		-0.0226371	0.04127		BPH	Bacteria	Acidobacteriota	Vicinamibacteria	Vicinamibacterales	Vicinamibacteraceae	Vicinamibacteraceae	Unidentified	0.9999992	CK
A554	H84	A554xH84	8.43699	8.63261	8.21473	8.5348	8.43699	bASV277		-0.0263435	0.0422685		BPH	Bacteria	Acidobacteriota	Vicinamibacteria	Vicinamibacterales	Vicinamibacteraceae	Vicinamibacteraceae	Unidentified	0.9999992	CK
Mo17	A554	Mo17xA554	8.13638	8.43699	8.22138	8.28669	8.43699	bASV277	-0.0078806			0.0181778	MPH	Bacteria	Acidobacteriota	Vicinamibacteria	Vicinamibacterales	Vicinamibacteraceae	Vicinamibacteraceae	Unidentified	0.9999992	CK
W64A	H99	W64AxH99	8.28162	8.27079	8.45368	8.2762	8.28162	bASV278		0.0207767	0.0339337		BPH	Bacteria	Actinobacteriota	Thermoleophilia	Gaiellales	Gaiellaceae	Gaiella	uncultured_Solirubrobacter	0.7001823	CK
Mo17	H84	Mo17xH84	8.56692	8.56521	8.36601	8.56607	8.56521	bASV280		-0.0232569	0.0144644		BPH	Bacteria	Myxococcota	Polyangia	Haliangiales	Haliangiaceae	Haliangium	uncultured_Myxococcales	0.9955218	CK
W64A	H99	W64AxH99	8.44757	8.57625	8.32425	8.51191	8.44757	bASV282		-0.0145974	0.0496396		BPH	Bacteria	Actinobacteriota	Acidimicrobiia	uncultured	uncultured	uncultured	Unidentified	0.7024152	CK
Mo17	H99	Mo17xH99	8.39403	8.57625	8.29466	8.48514	8.39403	bASV282		-0.0118381	0.0218081		BPH	Bacteria	Actinobacteriota	Acidimicrobiia	uncultured	uncultured	uncultured	Unidentified	0.7024152	CK
Mo17	B73	Mo17xB73	8.29062	8.30996	8.72904	8.30029	8.30996	bASV283		0.050432	0.033644		BPH	Bacteria	Acidobacteriota	Vicinamibacteria	Vicinamibacterales	uncultured	uncultured	uncultured_bacterium	0.8965253	CK
W64A	H84	W64AxH84	8.5293	8.55628	8.28756	8.54279	8.5293	bASV283		-0.0283416	0.0320087		BPH	Bacteria	Acidobacteriota	Vicinamibacteria	Vicinamibacterales	uncultured	uncultured	uncultured_bacterium	0.8965253	CK
[truncated: 4,523 more rows]

## Sheet: Table S8
Table S8 Heterotic fungal ASVs between each hybrid and their parents under each soil condition. CK: control soil; LN: low nitrogen soil; LP: low phosphorus soil. BPH: better-parent heterosis; MPH: mid-parent heterosis.
[truncated: 1,455 more rows]

[truncated: 3 more sheets: Table S9, Table S10, Table S11]
